# Supplementary material for: The Reading Palaeofire database: an expanded global resource to document changes in fire regimes from sedimentary charcoal records
Source: Copernicus journal article supplement (doi:10.5194/essd-2021-272), 2021-08-19
Supplement: Supplementary file 1 [file essd-2021-272-supplement.pdf]

**The Reading Palaeofire database: an expanded global resource to document changes in fire regimes from sedimentary charcoal records:  
Supplementary Information**

Sandy P. Harrison<sup>1,2</sup>, Roberto Villegas-Diaz<sup>1</sup>, Esmeralda Cruz-Silva<sup>1</sup>, Daniel Gallagher<sup>2,3</sup>, David Kesner<sup>1,2</sup>, Paul Lincoln<sup>1,2</sup>, Yicheng Shen<sup>1</sup>, Luke Sweeney<sup>1,2</sup>, Daniele Colombaroli<sup>2,3</sup>, Adam Ali<sup>4</sup>, Chéïma Barhoumi<sup>5</sup>, Yves Bergeron<sup>6,7</sup>, Tatiana Blyakharchuk<sup>8</sup>, Přemysl Bobek<sup>9</sup>, Richard Bradshaw<sup>10</sup>, Jennifer L. Clear<sup>11</sup>, Sambor Czerwiński<sup>12</sup>, Anne-Laure Daniau<sup>13</sup>, John Dodson<sup>14,15</sup>, Kevin J. Edwards<sup>16,17</sup>, Mary E. Edwards<sup>18</sup>, Angelica Feurdean<sup>19</sup>, David Foster<sup>20</sup>, Konrad Gajewski<sup>21</sup>, Mariusz Gałka<sup>22</sup>, Michelle Garneau<sup>23</sup>, Thomas Giesecke<sup>24</sup>, Graciela Gil Romera<sup>25,26</sup>, Martin P. Girardin<sup>27</sup>, Dana Hofer<sup>28</sup>, Kangyou Huang<sup>29</sup>, Jun Inoue<sup>30</sup>, Eva Jamrichová<sup>9</sup>, Nauris Jasiunas<sup>31</sup>, Wenying Jiang<sup>32</sup>, Gonzalo Jiménez-Moreno<sup>33</sup>, Monika Karpińska-Kołaczek<sup>12</sup>, Piotr Kołaczek<sup>12</sup>, Niina Kuosmanen<sup>34</sup>, Mariusz Lamentowicz<sup>35</sup>, Martin Lavoie<sup>36</sup>, Fang Li<sup>37</sup>, Jianyong Li<sup>38</sup>, Olga Lisitsyna<sup>39,40</sup>, José Antonio López-Sáez<sup>41</sup>, Reyes Luelmo-Lautenschlaeger<sup>41</sup>, Gabriel Magnan<sup>23</sup>, Eniko Katalin Magyari<sup>42</sup>, Alekss Maksims<sup>43</sup>, Katarzyna Marcisz<sup>12</sup>, Elena Marinova<sup>44</sup>, Jenn Marlon<sup>45</sup>, Scott Mensing<sup>46</sup>, Joanna Miroslaw-Grabowska<sup>47</sup>, Wyatt Oswald<sup>20,48</sup>, Sebastián Pérez-Díaz<sup>49</sup>, Ramón Pérez-Obiol<sup>50</sup>, Sanna Piilo<sup>51</sup>, Anneli Poska<sup>39,52</sup>, Xiaoguang Qin<sup>53</sup>, Cécile C. Remy<sup>54</sup>, Pierre Richard<sup>55</sup>, Sakari Salonen<sup>34</sup>, Naoko Sasaki<sup>56</sup>, Hieke Schneider<sup>57</sup>, William Shotyk<sup>58</sup>, Migle Stancikaite<sup>59</sup>, Dace Šteinberga<sup>43</sup>, Normunds Stivrins<sup>31,39,60</sup>, Hikaru Takahara<sup>61</sup>, Zhihai Tan<sup>62</sup>, Liva Trasune<sup>31,34</sup>, Charles E. Umbanhowar<sup>63</sup>, Minna Väiliranta<sup>51</sup>, Jüri Vassiljev<sup>39</sup>, Xiayun Xiao<sup>64</sup>, Qinghai Xu<sup>65</sup>, Xin Xu<sup>37</sup>, Edyta Zawisza<sup>66</sup>, Yan Zhao<sup>67</sup>, Zheng Zhou<sup>29</sup>

1: School of Archaeology, Geography & Environmental Science, Reading University, Whiteknights, Reading, RG6 6AH, UK

2: Leverhulme Centre for Wildfires, Environment and Society, Imperial College London, South Kensington, London, SW7 2BW, UK

3: Department of Geography, Royal Holloway, University of London, Egham, TW20 0 SS, UK

4: University de Montpellier, Institut des Sciences de l'Evolution (CNRS, IRD, EPHE), France

5: Department of Palynology and Climate Dynamics, Albrecht-von-Haller Institute for Plant Sciences, University of Göttingen, Untere Karspüle 2, 37073 Göttingen, Germany

6: Forest Research Institute (IRF), Université du Québec en Abitibi-Témiscamingue (UQAT), Rouyn-Noranda, QC, Canada J9X 5E4

7: Department of Biological Sciences, Université du Québec à Montréal (UQAM), Montréal, QC, Canada H3C 3P8

8: Institute of Monitoring of Climatic and Ecological Systems of Siberian branch of Russian Academy of Sciences (IMCES SB RAS), Tomsk, 634055, Russia

9: Institute of Botany, Czech Academy of Sciences, Lidická 25/27, 602 00 Brno, Czech Republic

10: Geography and Planning, University of Liverpool, Liverpool, L69 7ZT, UK

11: Department of Geography and Environmental Science, Liverpool Hope University, Taggart Street, Childwall, Liverpool, L16 9JD, UK

- 12: Climate Change Ecology Research Unit, Faculty of Geographical and Geological Sciences, Adam Mickiewicz University, Poznań, Bogumiła Krygowskiego 10, 61-680 Poznań, Poland
- 13: Environnements et Paléoenvironnements Océaniques et Continentaux (EPOC), Unité Mixte de Recherche (UMR) 5805, Centre National de la Recherche Scientifique (CNRS), Université de Bordeaux, 33615 Pessac, France
- 14: Institute of Earth Environment, Chinese Academy of Sciences, Keji 1st Rd, Yanta District, Xi'an, Shaanxi, China
- 15: School of Earth, Atmospheric and Life Sciences, University of Wollongong, Wollongong, NSW 2500, Australia
- 16: Department of Geography & Environment and Archaeology, University of Aberdeen, Aberdeen AB24 3UX, UK
- 17: McDonald Institute for Archaeological Research and Scott Polar Research Institute, University of Cambridge, Cambridge, UK
- 18: School of Geography and Environmental Science, University of Southampton, Southampton SO17 1BJ, UK
- 19: Department of Physical Geography, Goethe University, Altenhöferallee 1, 60438 Frankfurt am Main, Germany
- 20: Harvard Forest, Harvard University, Petersham MA 01366 USA
- 21: Département de Géographie, Environnement et Géomatique, Université d'Ottawa, Ottawa, ON, K1N6N5 Canada
- 22: University of Lodz, Faculty of Biology and Environmental Protection, Department of Biogeography, Paleoecology and Nature Protection, 1/3 Banacha Str., 90-237 Lodz, Poland
- 23: GEOTOP Research Center, Université du Québec à Montréal, Montréal QC, H2X 3Y7, Canada
- 24: Department of Physical Geography, Faculty of Geosciences, Utrecht University, Netherlands
- 25: Instituto Pirenaico de Ecología-CSIC, Avda. Montañana 1005, 50059, Zaragoza, Spain
- 26: Plant Ecology & Geobotany, Karl-Von-Frisch-Straße 8, Philipps University of Marburg, Marburg
- 27: Natural Resources Canada, Canadian Forest Service, Laurentian Forestry Centre, Quebec City, QC, Canada
- 28: Senckenberg Research Station of Quaternary Palaeontology, Am Jakobskirchhof 4, 99423 Weimar, Germany
- 29: School of Earth Sciences and Engineering, Sun Yat-sen University, Zhuhai 519082, China
- 30: Department of Geosciences, Graduate School of Science, Osaka City University, Osaka, Japan
- 31: Department of Geography, University of Latvia, Jelgavas iela 1, Riga, LV-1004, Latvia
- 32: Key Laboratory of Cenozoic Geology and Environment, Institute of Geology and Geophysics, Chinese Academy of Sciences, Beijing, China
- 33: Departamento de Estratigrafía y Paleontología, Facultad de Ciencias, Universidad de Granada, Avda. Fuente Nueva S/N, 18002 Granada, Spain
- 34: Department of Geosciences and Geography, University of Helsinki, P.O.Box 64, FI-00014, Helsinki, Finland
- 35: Faculty of Geographical and Geological Sciences, Adam Mickiewicz University in Poznan, Bogumiła Krygowskiego 10, 61-680 Poznan, Poland
- 36: Département de géographie, Université Laval, Québec, Canada
- 37: International Center for Climate and Environment Sciences, Institute of Atmospheric Physics, Chinese Academy of Sciences, Beijing, China
- 38: Shaanxi Key Laboratory of Earth Surface System and Environmental Carrying Capacity, College of Urban and Environmental Sciences, Northwest University, Xi'an 710127, China
- 39: Department of Geology, Tallinn University of Technology, Ehitajate tee 5, 19086 Tallinn, Estonia
- 40: Russian State Agrarian University, Timiryazevskaya st., 49, 127550, Moscow, Russia
- 41: Environmental Archaeology Research Group, Institute of History, CSIC, Madrid, Spain

- 42: Department of Environmental and Landscape Geography, ELKH-MTM-ELTE Research Group for Paleontology, Eotvos Lorand university, 1117 Budapest, Pazmany Peter stny 1/c, Budapest, Hungary
- 43: Department of Geology, University of Latvia, Jelgavas iela 1, Riga, LV-1004, Latvia
- 44: Laboratory for Archaeobotany, State Office for Cultural Heritage Baden-Württemberg, Fischersteig 9, 78343 Geienhofen-Hemmenhofen, Germany
- 45: Yale School of the Environment, New Haven, Connecticut 06511, USA
- 46: Department of Geography, University of Nevada Reno, 1664 N Virginia St, Reno, NV 89557, USA
- 47: Institute of Geological Sciences, Polish Academy of Sciences, Warsaw, Poland
- 48: Marlboro Institute for Liberal Arts and Interdisciplinary Studies, Emerson College, Boston MA 02116 USA
- 49: Department of Geography, Urban and Regional Planning, University of Cantabria, Santander, Spain
- 50: Unitat de Botànica, Facultat de Biociències, Universitat Autònoma de Barcelona, Cerdanyola del Vallès, 08193 Barcelona, Spain
- 51: Environmental Change Research Unit (ECRU), Ecosystems, Environment Research Programme, Faculty of Biological and Environmental Sciences, Viikinkaari 1, P.O. Box 65, 00014 University of Helsinki, Finland
- 52: Department of Physical Geography and Ecosystem Science, Lund University, Lund, Sweden
- 53: Key Laboratory of Cenozoic Geology and Environment, Institute of Geology and Geophysics, Chinese Academy of Sciences, No.19 Beitucheng West RD, Beijing, 100029, China
- 54: Institut für Geographie, Universität Augsburg, 86135 Augsburg, Germany
- 55: Département de géographie, Complexe des sciences, Université de Montréal, Montréal, H2V 0B3, Canada
- 56: Graduate School of Life and Environmental Sciences, Kyoto Prefectural University, 1-5 Hangi-cho, Shimogamo, Sakyo-ku, Kyoto 606-8522, Japan
- 57: Institut für Geographie, Friedrich-Schiller-Universität Jena, Löbdergraben 32, 07743 Jena, Germany
- 58: Department of Renewable Resources, University of Alberta, 348B South Academic Building, Edmonton, Alberta T6G 2H1, Canada
- 59: Institute of Geology and Geography, Nature Research Centre, Akademijos Str. 2, LT-08412, Vilnius, Lithuania
- 60: Latvian Institute of History, University of Latvia, Kalpaka blv. 4, Riga, LV-1050, Latvia
- 61: Graduate School of Agriculture, Kyoto Prefectural University, Shimogamo, Sakyo-ku, 1-5, Hangi-cho, 606-8522 Kyoto, Japan
- 62: School of Environment and Chemistry Engineering, Xi'an Polytechnic University, Xi'an, Shaanxi 710048, China
- 63: Departments of Biology and Environmental Studies, St Olaf College, 1520 St Olaf Ave, Northfield, MN 55057, USA
- 64: State Key Laboratory of Lake Science and Environment, Nanjing Institute of Geography and Limnology, Chinese Academy of Sciences, Nanjing 210008, China
- 65: College of Resources and Environment Sciences, Hebei Normal University, Shijiazhuang 050024, China
- 66: Institute of Geological Sciences, Polish Academy of Sciences, Twarda 51/55, 00-818 Warsaw, Poland
- 67: Institute of Geographic Sciences and Natural Resources Research, Chinese Academy of Sciences, Beijing 100101, China

This supplementary contains:

SI Table 1. Information of the charcoal records (sites and entities) in the Reading Palaeofire Database version 1. Latitude and longitude are in decimal degrees, and elevation in metres above/below sea level. Fields where information could be available but was never recorded or has subsequently been lost are represented by -999999, fields where we were unable to obtain this information but it could be included in subsequent updates of the database are represented by -777777, fields where specific information is not applicable are represented by -888888.

SI Table 2. List of pre-defined valid choices for restricted fields in the Reading Palaeofire Database version 1.

SI Table 3: List of charcoal measurement units currently used in the Reading Palaeofire Database version 1

SI Figure 1: Supplementary Figure 1. Summary of the stages used to select the optimum RBacon age models for from ageR. Plots A.-C. show the modelling output from ageR for an example entity from the RPD (Geral core), where the optimum age model selected by ageR A. is a table ranking the age model scenarios by the lowest area between the prior and posterior accumulation rate curves. Note that only the top 5 model scenarios of a total of 25 run for this entity are listed B. Shows the plots for the prior and posterior accumulation rates and the area between curves for the top 5 model scenarios. C. Is the top ranked RBacon age model (Accumulation rate = 15, thickness = 10) which was visually checked to verify that the interpolation through the dates was valid and consistent with the dates. In this example, the top ranked model scenario selected by ageR (Accumulation rate = 15, thickness= 10) was accepted as the chosen model scenario as the interpolation through the dates is valid.

SI Figure 2. An example of alternative model scenario selection where the top ranked ageR model scenario is deemed to be inaccurate. In this example, the top ranked model scenario from King Tableland Swamp (accumulation rate = 45, thickness = 5)(A.) with the lowest area between the prior and posterior accumulation rate curves (B.) does not accurately represent the date at 157.5cm. This age was included by the original authors and lies in stratigraphic order with the other dates. Therefore, this model is rejected in favour of the model with the next lowest abc score which accurately reflects the dates included (ageR model ranking 3 in A.). The RBacon plot for this age model scenario is shown in D. (accumulation rate = 90, thickness = 5) and is more accurately and precisely modelled through the dates than the model selected by ageR.

SI Table 1. Information of the charcoal records (sites and entities) in the Reading Palaeofire Database version 1. Latitude and longitude are in decimal degrees, and elevation in metres above/below sea level. Fields where information could be available but was never recorded or has subsequently been lost are represented by -999999, fields where we were unable to obtain this information but it could be included in subsequent updates of the database are represented by -777777, fields where specific information is not applicable are represented by -888888.

| Site name             | Entities (#) | Elevation (m) | Latitude (°) | Longitude (°) | Site Type                 | Water depth (m) | Basin size (km <sup>2</sup> ) | Citation(s)                                    |
|-----------------------|--------------|---------------|--------------|---------------|---------------------------|-----------------|-------------------------------|------------------------------------------------|
| 111                   | 1            | 225.00        | 59.912878    | -96.957600    | lacustrine                | 3.97            | 1.309                         | Umbanhowar Jr et al., 2021                     |
| 150                   | 1            | 299.00        | 59.875018    | -98.131800    | lacustrine                | 7.14            | 0.403                         | Umbanhowar Jr et al., 2021                     |
| 396                   | 1            | 317.00        | 59.571677    | -98.559100    | lacustrine                | 7.36            | 0.839                         | Umbanhowar Jr et al., 2021                     |
| 614                   | 1            | 268.00        | 59.321304    | -97.280400    | lacustrine                | 14.15           | 0.462                         | Umbanhowar Jr et al., 2021                     |
| 630                   | 1            | 271.00        | 59.314377    | -98.083600    | lacustrine                | 9.96            | 0.911                         | Umbanhowar Jr et al., 2021                     |
| 7-M Lake              | 1            | 213.00        | 62.500000    | -113.720000   | lacustrine                | 6.5             | 0.12                          | Lynch et al., 2002; Lynch et al., 2004         |
| 785                   | 1            | 234.00        | 59.118988    | -97.409300    | lacustrine                | 12.57           | 0.65                          | Umbanhowar Jr et al., 2021                     |
| Abalone Rocks Marsh   | 1            | 0.00          | 33.956389    | -119.976667   | coastal, salt marsh       |                 | -999999                       | Cole and Liu, 1994                             |
| Abbeyknockmoy Bog     | 1            | 60.00         | 53.440000    | -8.760000     | terrestrial, bog          | -777777         |                               | Barber et al., 2003                            |
| Abborrtjarnen         | 1            | 387.00        | 63.800000    | 14.370000     | lacustrine                | 6.5             | 0.03                          | Giesecke, 2005b                                |
| Abeille               | 1            | 441.00        | 54.114444    | -72.500278    | terrestrial, fen          | -888888         | 0.035                         | van Bellen et al., 2013                        |
| Ackgol                | 1            | 1000.00       | 37.300000    | 33.440000     | -777777                   | -777777         |                               | Turner et al., 2008                            |
| Adi Kolen I           | 1            | 2171.00       | 13.330000    | 39.360000     | terrestrial, soil         | -777777         |                               | Gebru et al., 2009                             |
| Adi Kolen II          | 1            | 2171.00       | 13.330000    | 39.360000     | terrestrial, soil         | -777777         |                               | Gebru et al., 2009                             |
| Adi Kolen III         | 1            | 2171.00       | 13.332167    | 39.364600     | terrestrial, soil         | -888888         | -999999                       | Gebru et al., 2009                             |
| Adigrat               | 1            | 2493.00       | 14.270433    | 39.447827     | terrestrial, soil         | -888888         | -999999                       | Moeyersons et al., 2006                        |
| Aeroporto             | 2            | 431.00        | 54.101027    | -72.516166    | terrestrial, fen          | -888888         | 0.03                          | van Bellen et al., 2013                        |
| Aguada de Petapilla   | 1            | 705.00        | 14.860000    | -89.120000    | terrestrial, mire         | -888888         | 0.09                          | Rue et al., 2002                               |
| Aguai Ramata          | 1            | 1950.00       | -6.560000    | 145.210000    | lacustrine, volcanic lake | 2.9             |                               | Haberle, 2007                                  |
| Agulhas Negras        | 1            | 2410.00       | -22.385319   | -44.669802    | terrestrial, mire         | -888888         | -999999                       | Behling et al., 2020                           |
| Ahlequellmoor         | 1            | 300.00        | 51.730000    | 9.510000      | terrestrial, fen          |                 | 0.1                           | Jahns, 2005                                    |
| Aino Pond             | 1            | 354.00        | 42.680759    | -71.925514    | lacustrine                | 2.5             | 0.018                         | Fuller et al., 1998; Parshall and Foster, 2002 |
| Airag Nuur            | 1            | 1030.00       | 48.908700    | 93.307600     | lacustrine                | 9.1             | 180.22                        | Umbanhowar Jr et al., 2009                     |
| Aire Crossing         | 1            | 180.00        | -38.640000   | 143.470000    | terrestrial               | -888888         | -999999                       | McKenzie and Kershaw, 2004                     |
| Airport 1             | 1            | 175.00        | 53.653500    | -77.729000    | terrestrial, bog          | -888888         | -999999                       | Magnan et al., 2012                            |
| Airport 2             | 1            | 175.00        | 53.653600    | -77.726300    | terrestrial, bog          | -888888         | -999999                       | Magnan et al., 2012                            |
| Aishihik WA01 (Yukon) | 2            | 1000.00       | 61.233000    | -136.917000   | lacustrine                | 1               | 0.001                         | Rainville and Gajewski, 2013                   |
| Ajax Bog              | 1            | 680.00        | -46.419200   | 169.292200    | terrestrial, bog          | 10              | -888888                       | McGlone, 2009                                  |
| Ajkwa 1               | 1            | 1.30          | -4.860000    | 136.960000    | coastal, estuarine        | -888888         | -888888                       | Ellison, 2005                                  |
| Ajkwa 2               | 1            | 1.30          | -4.860000    | 136.960000    | coastal, estuarine        | -888888         | -888888                       | Ellison, 2005                                  |

| Site name                                        | Entities (#) | Elevation (m) | Latitude (°) | Longitude (°) | Site Type                   | Water depth (m) | Basin size (km <sup>2</sup> ) | Citation(s)                                                                                           |
|--------------------------------------------------|--------------|---------------|--------------|---------------|-----------------------------|-----------------|-------------------------------|-------------------------------------------------------------------------------------------------------|
| Ajkwa 3                                          | 1            | 1.30          | -4.860000    | 136.960000    | coastal, estuarine          | -888888         | -888888                       | Ellison, 2005                                                                                         |
| Ajkwa 4                                          | 1            | 1.30          | -4.860000    | 136.960000    | coastal, estuarine          | -888888         | -888888                       | Ellison, 2005                                                                                         |
| Ajkwa 5                                          | 1            | 1.30          | -4.860000    | 136.960000    | coastal, estuarine          | -888888         | -888888                       | Ellison, 2005                                                                                         |
| Akali                                            | 1            | 30.50         | 58.408056    | 27.231944     | terrestrial, mire           | 0.2             | 25.68                         | Poska and Saarse, 2006                                                                                |
| Akkol Lake                                       | 1            | 2204.00       | 50.250000    | 89.625000     | lacustrine, glacial origin  | 2.8             | 3.2                           | Blyakharchuk et al., 2007                                                                             |
| Alahake                                          | 3            | 483.00        | 47.693806    | 87.544583     | lacustrine                  | 2               | 2.4                           | Li et al., 2019                                                                                       |
| Alamo Bog                                        | 1            | 2630.00       | 35.910000    | -106.580000   | terrestrial, bog            | -888888         | 0.5                           | Allen et al., 2008; Anderson et al., 2008a; Brunner Jass, 1999                                        |
| Albion                                           | 1            | 320.00        | 45.670800    | -71.325000    | lacustrine                  | 1               | 0.025                         | Carcaillet and Richard, 2000                                                                          |
| Aligol                                           | 1            | 1550.00       | 41.630000    | 44.010000     | terrestrial, bog            | 0.5             | -999999                       | Connor and Sagona, 2007; Connor, Unpublished                                                          |
| Allom Lake                                       | 1            | 100.00        | -25.230000   | 153.160000    | lacustrine                  | 3.7             | 0.015                         | Donders et al., 2006                                                                                  |
| Almalou                                          | 1            | 2491.00       | 37.665278    | 46.631944     | terrestrial, bog            | -888888         | -999999                       | Djamali et al., 2009; Djamali et al., 2010                                                            |
| Altar Lough                                      | 1            | 30.00         | 55.016700    | -8.400000     | lacustrine                  | 2.5             | 0.012                         | Fossitt, 1994                                                                                         |
| Alvor Estuary Ribeira do Farelo Ribeira da Torre | 2            | 0.60          | 37.151969    | -8.594376     | coastal, estuarine          | -888888         | -999999                       | Schneider et al., 2010; Schneider et al., 2016                                                        |
| Amber Lake Minnesota                             | 1            | 351.00        | 43.605300    | -94.472500    | lacustrine                  | 6               | 0.73                          | <a href="https://www.ncdc.noaa.gov/paleo/study/21017">https://www.ncdc.noaa.gov/paleo/study/21017</a> |
| Amont                                            | 1            | 335.00        | 53.730000    | -74.380000    | terrestrial, bog            | -888888         |                               | Cedric, 2008                                                                                          |
| Anderson Pond                                    | 1            | 300.00        | 36.028495    | -85.505116    | lacustrine                  | 1               | 0.35                          | Horn et al., 2019                                                                                     |
| Andy Lake                                        | 1            | 360.00        | 61.950000    | -109.810000   | lacustrine                  | 9.5             | 0.1                           | Lynch et al., 2004                                                                                    |
| Anggi Lakes                                      | 1            | 1945.00       | -1.390000    | 133.894893    | lacustrine, tectonic origin | 200             | -999999                       | Hope, 2007b                                                                                           |
| Anstey's Combe                                   | 1            | 282.00        | 51.054451    | -3.674715     | terrestrial, mire           | -888888         | -999999                       | Fyfe et al., 2003                                                                                     |
| Anteojos Valley                                  | 2            | 3984.00       | -0.965767    | -78.406617    | terrestrial, mire           | -888888         | -999999                       | Villota et al., 2015                                                                                  |
| Antu Sinjarv                                     | 2            | 95.00         | 59.062500    | 26.240000     | lacustrine                  | 7.3             | 0.024                         | Laumets et al., 2013                                                                                  |
| Anumon Swamp                                     | 1            | 45.00         | -20.162800   | 169.827500    | terrestrial, fen            | -888888         | -999999                       | Hope, 1996a                                                                                           |
| Anyang Huanhe River 01                           | 1            | 67.00         | 36.100000    | 114.400000    | fluvial                     |                 | -999999                       | Cao, 2008                                                                                             |
| Anyang Huanhe River 02                           | 1            | 103.00        | 36.160000    | 114.160000    | fluvial                     |                 | -999999                       | Cao, 2008                                                                                             |
| Anzac                                            | 1            | 497.00        | 56.471944    | -111.042778   | terrestrial, bog            | -888888         | -999999                       | Magnan et al., 2018                                                                                   |
| Appleman Lake                                    | 1            | 293.00        | 41.623331    | -85.212806    | lacustrine                  | 9               | 0.21                          | Gill et al., 2009                                                                                     |
| Apsuciems Mire                                   | 1            | 6.60          | 57.053642    | 23.317031     | terrestrial, fen            | -888888         | 0.15                          | Gaika et al., 2016                                                                                    |
| Aracatuba                                        | 1            | 1500.00       | -25.910000   | -48.980000    | terrestrial, mire           | -888888         | 0.006                         | Behling, 2007                                                                                         |
| Araisu lake                                      | 2            | 120.20        | 57.250912    | 25.289886     | lacustrine                  | 12.3            | 0.326                         | Stivrins et al., 2014; Stivrins et al., 2016                                                          |
| Arbarrain Mire                                   | 1            | 1004.00       | 43.211400    | -2.172900     | terrestrial, bog            | -888888         | 0.0156                        | Pérez-Díaz et al., 2018                                                                               |
| Argan Swamp                                      | 2            | 3.00          | -10.050000   | 142.060000    | coastal                     | 0               |                               | Rowe, 2006a                                                                                           |
| Armacao de Pera Ribeira de Alcantarilha          | 2            | 2.40          | 37.110107    | -8.344590     | coastal, estuarine          | -888888         | -999999                       | Schneider et al., 2010; Schneider et al., 2016                                                        |

| Site name                         | Entities (#) | Elevation (m) | Latitude (°) | Longitude (°) | Site Type                  | Water depth (m) | Basin size (km <sup>2</sup> ) | Citation(s)                                                                                                         |
|-----------------------------------|--------------|---------------|--------------|---------------|----------------------------|-----------------|-------------------------------|---------------------------------------------------------------------------------------------------------------------|
| Arrow Lake                        | 1            | 90.00         | 60.750000    | -150.516667   | lacustrine                 | 10.5            | 0.105                         | Lynch et al., 2002                                                                                                  |
| Arroyo de Aguas Frias             | 1            | 1120.00       | 40.266700    | -5.116700     | terrestrial, bog           | -888888         | 0.03                          | Camarero et al., 2019                                                                                               |
| Arroyo de las Carcavas            | 1            | 1300.00       | 40.841900    | -4.031400     | terrestrial, small hollow  | -888888         | 7e-04                         | Morales-Molino et al., 2017a                                                                                        |
| Arroyo de Valdeconejos            | 1            | 1380.00       | 40.862200    | -4.059700     | terrestrial, mire          | -888888         | 0.00126                       | Morales-Molino et al., 2017a                                                                                        |
| Artxilondo                        | 1            | 900.00        | 43.030000    | -1.130000     | terrestrial, mire          | -888888         | -999999                       | Galop et al., 2004                                                                                                  |
| Aru                               | 1            | 1.00          | -5.910000    | 134.200000    | terrestrial                | 0               |                               | Hope and Aplin, 2005                                                                                                |
| Asi Gonia                         | 1            | 780.00        | 35.248773    | 24.277500     | terrestrial, bog           | -888888         | -999999                       | Atherden and Hall, 1999; Jouffroy-Bapicot et al., 2016                                                              |
| Attekposmosse                     | 2            | 177.50        | 56.383333    | 12.850000     | terrestrial, bog           | 0               | -999999                       | Håkansson, 1984; Wohlfarth et al., 2018                                                                             |
| Auassat                           | 1            | 466.00        | 51.813600    | -63.691900    | terrestrial, fen           | -888888         | 0.22                          | Primeau and Garneau, 2021                                                                                           |
| Aurelie Lake                      | 1            | 428.00        | 50.418500    | -74.235444    | lacustrine                 | 5.7             | 0.0018                        | El-Guellab et al., 2015                                                                                             |
| Aval                              | 1            | 335.00        | 53.410000    | -73.860000    | terrestrial, bog           | 0               |                               | Cedric, 2008                                                                                                        |
| Avril Lake                        | 1            | 472.00        | 49.368740    | -89.418470    | lacustrine                 | 5               | 0.027                         | Senici et al., 2015                                                                                                 |
| Ayla Lake                         | 1            | 582.00        | 52.894250    | -67.040920    | lacustrine                 | 10.2            | 0.108                         | Remy et al., 2017                                                                                                   |
| Azzano Decimo                     | 1            | 10.00         | 45.880000    | 12.710000     | terrestrial                |                 |                               | Pini et al., 2009                                                                                                   |
| Badu 15                           | 2            | 20.00         | -10.060000   | 142.090000    | terrestrial                | -888888         | -999999                       | Rowe, 2006a; Rowe, 2006b; Rowe, 2007                                                                                |
| Baga Nuur                         | 1            | 981.00        | 49.920800    | 93.849300     | lacustrine                 | 7.1             | 3.14                          | Umbanhowar Jr et al., 2009                                                                                          |
| Bagno Kusowo                      | 3            | 155.00        | 53.807778    | 16.587222     | terrestrial, bog           | -888888         | 3.19                          | Marcisz et al., 2017; Marcisz et al., 2019                                                                          |
| Bagno Serebryskie                 | 1            | 173.00        | 51.176363    | 23.526241     | terrestrial, fen           |                 | 3.76                          | Galka et al., 2017                                                                                                  |
| Baie                              | 1            | 17.00         | 49.096600    | -68.250000    | terrestrial, bog           | -888888         | 24.2                          | Magnan et al., 2014                                                                                                 |
| Bakaly                            | 1            | 1879.00       | 42.450000    | 72.600000     | lacustrine                 | 5               |                               | Beer, Unpublished                                                                                                   |
| Baker Lake, Montana               | 1            | 2300.00       | 45.891785    | -114.263047   | lacustrine, glacial origin | 16              | -999999                       | Brunelle et al., 2005; Brunelle-Daines, 2002                                                                        |
| Ballachrink                       | 1            | 20.00         | 54.370000    | -4.470000     | terrestrial, buried fen    | -888888         | -999999                       | Innes et al., 2003                                                                                                  |
| Balywillin Crannog Lake Kinale    | 1            | 62.00         | 52.775000    | -7.416700     | lacustrine                 | 4               | 6                             | Brown et al., 2005a                                                                                                 |
| Banda Sea Core SHI-9014           | 1            | -3163.00      | -5.760000    | 126.960000    | marine                     | -888888         | -888888                       | van der Kaars et al., 2000                                                                                          |
| Bao-1                             | 1            | 1775.00       | 19.060000    | -71.030000    | terrestrial, mire          | 0.15            | -999999                       | Kennedy et al., 2006                                                                                                |
| Bar20                             | 1            | 18.00         | -10.100000   | 142.120000    | coastal                    | 0.8             | -999999                       | Rowe, 2006a; Rowe, 2007                                                                                             |
| Barrett Lake                      | 1            | 2816.00       | 37.588994    | -118.996235   | lacustrine                 | 8.1             | 0.032                         | Hallett and Anderson, 2010                                                                                          |
| Basa de la Mora                   | 1            | 1906.00       | 42.545270    | 0.325500      | lacustrine, glacial origin | 4.5             | 0.03                          | Pérez-Sanz et al., 2013                                                                                             |
| Bashania die-off soil profile     | 1            | -999999.00    | 33.660000    | 107.795000    | terrestrial                |                 | -999999                       | Rayle et al., 2015                                                                                                  |
| Bashania non-die-off soil profile | 1            | -999999.00    | 33.660000    | 107.795000    | terrestrial                |                 | -999999                       | Rayle et al., 2015                                                                                                  |
| Basin (COHMAP2k)                  | 1            | 125.00        | 44.466667    | -70.050000    | lacustrine                 | 32              | 0.134                         | Gajewski et al., 1987                                                                                               |
| Bass Lake Faribault County        | 1            | 314.00        | 43.820530    | -94.078250    | lacustrine                 | 6               | 0.81                          | Umbanhowar Jr, Unpublished                                                                                          |
| Bass Lake Kandiyohi County        | 1            | 361.00        | 45.197500    | -94.879100    | lacustrine                 | 10              | 19.61                         | <a href="https://www.ncdc.noaa.gov/paleo-search/study/21050">https://www.ncdc.noaa.gov/paleo-search/study/21050</a> |

| Site name                | Entities (#) | Elevation (m) | Latitude (°) | Longitude (°) | Site Type                     | Water depth (m) | Basin size (km <sup>2</sup> ) | Citation(s)                                                                   |
|--------------------------|--------------|---------------|--------------|---------------|-------------------------------|-----------------|-------------------------------|-------------------------------------------------------------------------------|
| Batbold Nuur             | 1            | 2150.00       | 51.347600    | 98.874930     | lacustrine                    | 15.5            | 0.14                          | Robinson, 2007                                                                |
| Bates Pond<br>Canterbury | 1            | 95.00         | 41.658780    | -72.016230    | lacustrine                    | 3.6             | 0.027                         | Kdster and Pienitz, 2006b                                                     |
| Batorliget Marsh         | 1            | 130.00        | 47.750000    | 22.500000     | terrestrial,<br>marsh         | -888888         | 0.035                         | Willis et al., 1995                                                           |
| Battle Ground Lake       | 1            | 154.00        | 45.800000    | -122.490000   | lacustrine                    | 16.13           | 0.135                         | Juvigné, 1986; Walsh et al., 2008                                             |
| Bayan Nuur               | 1            | 1540.00       | 48.463100    | 95.160400     | lacustrine                    | 14              | 64.01                         | Umbanhowar Jr et al., 2009                                                    |
| Bayangdian Lake          | 1            | 7.97          | 38.840000    | 115.990000    | lacustrine                    | 2               | -999999                       | Fan et al., 2019                                                              |
| Bazu bog                 | 1            | 15.00         | 57.700040    | 22.450210     | terrestrial, bog              | -888888         | 2646                          | Stivrins, Unpublished                                                         |
| BC 1                     | 4            | 120.00        | 57.147783    | -120.651383   | terrestrial, bog              | -888888         | -999999                       | Väliranta et al., Unpublished                                                 |
| BC 2                     | 4            | 120.00        | 58.431900    | -120.119444   | terrestrial, bog              | -888888         | -999999                       | Väliranta et al., Unpublished                                                 |
| BC 4                     | 4            | 120.00        | 58.852222    | -122.422778   | terrestrial, bog              | -888888         | -999999                       | Väliranta et al., Unpublished                                                 |
| Beach Lake               | 1            | 81.00         | 65.216667    | -127.050000   | lacustrine                    | -999999         | -999999                       | Rowe et al., 1975                                                             |
| BEAT, Glen Affric        | 1            | 270.00        | 57.259899    | -4.966109     | terrestrial                   | -888888         | -999999                       | Shaw and Tipping, 2006                                                        |
| Beaver Lake,<br>Nebraska | 1            | 900.00        | 42.460044    | -100.670164   | lacustrine                    | -777777         |                               | Clark et al., 2001                                                            |
| Beaver Lake, Ontario     | 1            | 468.00        | 49.534350    | -90.400190    | lacustrine                    | 4               | 0.032                         | Senici et al., 2015                                                           |
| Beaver Lake, Oregon      | 1            | 69.00         | 44.917167    | 123.296333    | lacustrine,<br>fluvial origin | 1.5             | 0.01                          | Walsh et al., 2010a                                                           |
| Beef Pasture             | 3            | 3060.00       | 37.416667    | -108.150000   | terrestrial                   | -888888         | 0.75                          | Petersen, 1988                                                                |
| Beg Bunar                | 1            | 1750.00       | 42.150000    | 22.550000     | terrestrial, bog              | -888888         | -999999                       | Lazarova et al., 2015                                                         |
| Bega Swamp               | 1            | 1080.00       | -36.510000   | 149.500000    | terrestrial, bog              | -888888         | -999999                       | Polach and Singh, 1980                                                        |
| Belauer See              | 1            | 26.00         | 54.100000    | 10.253300     | lacustrine                    | 29              | 1.15                          | Dörfler et al., 2012; Wiethold, 1998                                          |
| Beliya Kanton            | 1            | 1547.00       | 41.730000    | 24.140000     | terrestrial, bog              |                 | 0.095                         | Marinova, Unpublished                                                         |
| Ben Lake                 | 1            | 480.00        | 49.356950    | -89.769560    | lacustrine                    | 5               | 0.016                         | Senici et al., 2013                                                           |
| Bereket Basin            | 1            | 1410.00       | 37.545000    | 30.295000     | terrestrial,<br>marsh         | -888888         | -999999                       | Kaniewski et al., 2008                                                        |
| Bermu Mire               | 2            | 783.00        | 39.434100    | -4.146000     | terrestrial, bog              | -888888         | 5e-04                         | Luelmo-Lautenschlaeger et al., 2018                                           |
| Berry East Pond          | 1            | 43.00         | 42.620100    | -71.087330    | lacustrine                    | -999999         | 0.016                         | Oswald et al., 2007; Oswald, Unpublished                                      |
| BI02 (North Quebec)      | 1            | 210.00        | 57.120000    | -76.380000    | lacustrine                    | 7.5             | 0.007                         | Gajewski, 2019                                                                |
| Bialowieza forest Site 2 | 4            | 165.00        | 52.751900    | 23.878900     | terrestrial,<br>small hollow  | -888888         | 1e-05                         | Mitchell and Cole, 1998                                                       |
| Bibersee                 | 1            | 430.00        | 47.206944    | 8.466667      | terrestrial, mire             | -888888         | -999999                       | Tinner and Lotter, 2006                                                       |
| Bielice                  | 1            | 185.00        | 48.620000    | 18.340000     | terrestrial, fen              |                 | -999999                       | Hájková et al., 2013                                                          |
| Big Beer                 | 1            | 315.00        | 53.122810    | -60.103610    | lacustrine                    | 1.25            | 1.35                          | Umbanhowar Jr and Camill, 2020                                                |
| Big Fish Lake            | 1            | 320.00        | 42.883960    | -83.392430    | lacustrine                    | 21              | 0.43                          | Ballard, 2009                                                                 |
| Big Spirit Lake Iowa     | 1            | 449.00        | 43.484620    | -95.106170    | lacustrine                    | 7.3             | 23                            | Umbanhowar Jr, Unpublished                                                    |
| Binnewater Pond          | 1            | 256.00        | 41.409742    | -74.551738    | lacustrine                    | -999999         | 0.26                          | Robinson et al., 2005                                                         |
| Birzulis                 | 2            | 148.00        | 55.780000    | 22.470000     | lacustrine                    | 4.5             | 1                             | Stančikaitė et al., 2006                                                      |
| Biviere di Gela          | 1            | 7.00          | 37.016700    | 14.330000     | lacustrine                    | 6               | 1.2                           | Noti et al., 2009                                                             |
| Bjornfjelltjorn          | 1            | 510.00        | 68.444160    | 18.071660     | lacustrine                    | 12.9            | -999999                       | Bjune et al., 2008                                                            |
| Black HF                 | 1            | 13.00         | 41.328100    | -70.792300    | lacustrine                    | -999999         | 0.014                         | Oswald et al., 2018; Oswald et al., 2020                                      |
| Black Loch               | 4            | 90.00         | 56.000000    | -3.000000     | lacustrine                    | 3               | 0.015                         | Edwards and Whittington, 2000; Edwards et al., 2000; Whittington et al., 1991 |



| Site name               | Entities (#) | Elevation (m) | Latitude (°) | Longitude (°) | Site Type                 | Water depth (m) | Basin size (km <sup>2</sup> ) | Citation(s)                                                                                                                                                                                               |
|-------------------------|--------------|---------------|--------------|---------------|---------------------------|-----------------|-------------------------------|-----------------------------------------------------------------------------------------------------------------------------------------------------------------------------------------------------------|
| Black Pond              | 1            | 262.00        | 35.620000    | -84.180000    | lacustrine                | 0.1             |                               | Cridlebaugh, 1984; Delcourt and Delcourt, 1997a; Delcourt and Delcourt, 1997b; Delcourt and Delcourt, 1998; Delcourt et al., 1983; Delcourt et al., 1986; Delcourt et al., 1998; Meeks, 2004; Meeks, 2005 |
| Black Swamp             | 1            | 1450.00       | -32.050000   | 151.466700    | terrestrial, bog          | -888888         | -999999                       | Dodson et al., 1986                                                                                                                                                                                       |
| Blaneys Pond HF         | 1            | 5.00          | 41.471700    | -70.765200    | lacustrine                | -999999         | 0.01                          | Oswald et al., 2018; Oswald et al., 2020                                                                                                                                                                  |
| Blood Pond HF           | 1            | 214.00        | 42.080000    | -71.961500    | lacustrine                | 3.6             | 0.085                         | Lindbladh et al., 2007; Oswald and Foster, 2013; Oswald et al., 2007; Oswald et al., 2020                                                                                                                 |
| Blue Lake Kosciuzko     | 1            | 1950.00       | -36.140000   | 148.430000    | lacustrine                | 28              | 0.16                          | Raine, 1974                                                                                                                                                                                               |
| Bluff Lake CA           | 1            | 1926.00       | 41.346415    | -122.559950   | lacustrine                | 1.7             | 0.03                          | Mohr et al., 2000                                                                                                                                                                                         |
| Blundells Flat          | 2            | 762.00        | -35.190000   | 148.490000    | terrestrial, fen          | -888888         | -999999                       | Hope et al., 2006b                                                                                                                                                                                        |
| BN07 (North Quebec)     | 1            | 395.00        | 55.000000    | -73.520000    | lacustrine                | 2.8             | 0.34                          | Gajewski, 2019                                                                                                                                                                                            |
| Bobundara Swamp         | 1            | 75.00         | -36.583300   | 150.060000    | coastal, estuarine        | -999999         | 1.2                           | Hope et al., 2006a                                                                                                                                                                                        |
| Bogdanowka-Belo         | 3            | 675.00        | 49.754200    | 19.794350     | terrestrial, buried fen   | -888888         | 0.003                         | Kołaczek et al., 2017; Kołaczek et al., 2020                                                                                                                                                              |
| Boggy Swamp             | 1            | 1160.00       | -29.960000   | 151.490000    | terrestrial, bog          | -888888         | -999999                       | Dodson et al., 1986                                                                                                                                                                                       |
| Bohult Hollow           | 1            | 77.00         | 57.233300    | 16.166700     | terrestrial, small hollow | -888888         | 0.005                         | Axelsson, 1995; Lindbladh et al., 2000                                                                                                                                                                    |
| Boigu Gawat             | 1            | 10.00         | -10.100000   | 142.140000    | coastal                   | 0.1             | -999999                       | Rowe, 2006a; Rowe, 2007                                                                                                                                                                                   |
| Bolan Lake              | 1            | 1637.00       | 41.022500    | -122.458300   | lacustrine                | 11.25           | 0.05                          | Briles et al., 2005                                                                                                                                                                                       |
| Bolin Billabong         | 1            | 50.00         | -37.766700   | 145.066700    | fluvial                   | 3               | 0.017                         | Leahy et al., 2005                                                                                                                                                                                        |
| Bolshoe Bog             | 1            | 450.00        | 51.460000    | 104.500000    | terrestrial, mire         | -888888         | -999999                       | Krivanogov et al., 2004; Takahara and Krivanogov, Unpublished                                                                                                                                             |
| Bolton Fell Moss        | 1            | 110.00        | 55.020000    | -2.850000     | terrestrial, bog          | -888888         | 3.65                          | Barber et al., 2003                                                                                                                                                                                       |
| Boluo Pond              | 1            | -999999.00    | 44.380000    | 124.820000    | terrestrial, bog          |                 | 70                            | He et al., 2015                                                                                                                                                                                           |
| Bonatoa                 | 1            | 4.00          | -18.070000   | 178.530000    | terrestrial, bog          | 0.5             | -999999                       | Hope et al., 1999; Hope, 1996b                                                                                                                                                                            |
| Bondi Lake              | 2            | 22.00         | -36.800000   | 149.930000    | coastal                   | 4.5             | 0.7                           | Dodson et al., 1993                                                                                                                                                                                       |
| Boomerang Lake          | 1            | 360.00        | 49.180000    | -124.150000   | lacustrine                | 7               | 0.627                         | Brown et al., 2006                                                                                                                                                                                        |
| Bopaiah                 | 1            | 910.00        | 12.153889    | 75.713056     | terrestrial, mire         | -888888         | -999999                       | Nogué et al., 2017                                                                                                                                                                                        |
| Borreguil de la Caldera | 1            | 2992.00       | 37.050600    | -3.323300     | terrestrial, bog          | -888888         | 0.0017                        | Ramos-Román et al., 2016                                                                                                                                                                                  |
| Borsteler Moor          | 2            | 36.21         | 52.638810    | 8.972081      | terrestrial, bog          | -888888         | -999999                       | Shumilovskikh et al., 2015                                                                                                                                                                                |
| Bortala River           | 1            | 1300.00       | 44.973730    | 81.031340     | terrestrial, marsh        |                 | 38.4                          | Li and Wang, 2020                                                                                                                                                                                         |
| Botucatu                | 1            | 500.00        | -23.180000   | -48.000000    | terrestrial, soil         | -888888         | -888888                       | Marques Gouveia et al., 2002; Ruiz Pessenda et al., 2004                                                                                                                                                  |
| Boulder Flat            | 1            | 25.00         | -37.450000   | 148.920000    | terrestrial               | -888888         | -999999                       | Kenyon, 1989                                                                                                                                                                                              |
| Bouleau                 | 1            | 108.00        | 50.523900    | -63.207300    | terrestrial, bog          | -888888         | 1.51                          | Primeau and Garneau, 2021; Primeau and Garneau, Unpublished                                                                                                                                               |
| Braamhoek               | 1            | 1700.00       | -28.230000   | 25.580000     | terrestrial, fen          | -888888         |                               | Norström et al., 2009                                                                                                                                                                                     |
| Breadalbane             | 1            | 694.00        | -34.800000   | 149.510000    | lacustrine, drained lake  | -888888         | -999999                       | Dodson, 1986                                                                                                                                                                                              |

| Site name                        | Entities (#) | Elevation (m) | Latitude (°) | Longitude (°) | Site Type                  | Water depth (m) | Basin size (km <sup>2</sup> ) | Citation(s)                                                                                                                                                                                               |
|----------------------------------|--------------|---------------|--------------|---------------|----------------------------|-----------------|-------------------------------|-----------------------------------------------------------------------------------------------------------------------------------------------------------------------------------------------------------|
| Breclav                          | 1            | 160.00        | 48.770000    | 16.875469     | terrestrial, fen           | -888888         | 0.125                         | Jamrichová, Unpublished                                                                                                                                                                                   |
| Brenda Lake                      | 1            | 207.00        | 62.350000    | -119.190000   | lacustrine                 | 5.86            | -999999                       | Lynch et al., 2004                                                                                                                                                                                        |
| Bricu lake                       | 1            | 208.40        | 57.115374    | 25.870619     | lacustrine                 | 2.7             | 0.16                          | Steinberga and Stivirins, 2021                                                                                                                                                                            |
| Bridgewater Lakes                | 1            | 20.00         | -38.300000   | 141.380000    | lacustrine                 | 5               | -999999                       | Head, 1988                                                                                                                                                                                                |
| Brooks Ridge Fen                 | 1            | 1450.00       | -36.150000   | 148.590000    | terrestrial, fen           | -888888         |                               | Mooney et al., 1997                                                                                                                                                                                       |
| Bruckmisse                       | 3            | 670.00        | 48.732500    | 8.644200      | terrestrial, bog           | -888888         | -999999                       | Rösch et al., 2005; Rösch, 2007                                                                                                                                                                           |
| Brule (Quebec Ontario)           | 1            | 270.00        | 45.717000    | -75.433000    | lacustrine                 | 45              | 0.1                           | Lafontaine-Boyer and Gajewski, 2014                                                                                                                                                                       |
| Brurskardtjorni                  | 1            | 1309.00       | 61.416667    | 8.666667      | lacustrine                 | 10              | -999999                       | Bjune, 2005                                                                                                                                                                                               |
| Brve                             | 1            | 362.00        | 50.066660    | 14.238880     | terrestrial, fen           | -888888         | 0.06                          | Pokorný and van der Knaap, 2011                                                                                                                                                                           |
| Buhaiescu Mare                   | 1            | 1918.00       | 47.570000    | 23.643333     | lacustrine, glacial origin | 0.5             | 0.009                         | Feurdean et al., 2020b; Geantă et al., 2014                                                                                                                                                               |
| Burnt Knob Lake                  | 1            | 2250.00       | 45.700000    | -114.980000   | lacustrine, glacial origin | 5.5             | 0.035                         | Brunelle and Whitlock, 2003                                                                                                                                                                               |
| Burruga Swamp                    | 1            | 1462.00       | -32.020000   | 151.430000    | terrestrial, bog           | -888888         |                               | Dodson et al., 1994c                                                                                                                                                                                      |
| Burralow Creek Swamp             | 1            | 320.00        | -33.530000   | 150.630000    | terrestrial, fen           | -888888         |                               | Chalson, 1991                                                                                                                                                                                             |
| Butchers Swamp                   | 1            | 1230.00       | -29.970000   | 151.450000    | terrestrial, bog           | -888888         | -999999                       | Dodson et al., 1986                                                                                                                                                                                       |
| Butler Lake                      | 1            | 316.00        | 43.662484    | -88.134088    | lacustrine                 | 4               | 0.03                          | Long et al., 2011b                                                                                                                                                                                        |
| Buxton                           | 1            | 235.00        | -37.440000   | 145.690000    | terrestrial, bog           | -888888         |                               | McKenzie, 2002                                                                                                                                                                                            |
| Byenup Lagoon                    | 2            | 175.00        | -34.460000   | 116.730000    | lacustrine                 | 2.8             | 12                            | Dodson and Lu, 2000                                                                                                                                                                                       |
| Cahaba Pond                      | 1            | 204.00        | 33.500000    | -86.530000    | lacustrine                 | 1.34            | 0.002                         | Cridlebaugh, 1984; Delcourt and Delcourt, 1997a; Delcourt and Delcourt, 1997b; Delcourt and Delcourt, 1998; Delcourt et al., 1983; Delcourt et al., 1986; Delcourt et al., 1998; Meeks, 2004; Meeks, 2005 |
| Caihe Town                       | 1            | 1190.00       | 47.510000    | 120.870000    | lacustrine, volcanic lake  | 6.5             | 0.03                          | Wu and Liu, 2013                                                                                                                                                                                          |
| Cain HF                          | 1            | 20.00         | 41.858300    | -70.978400    | lacustrine                 | -999999         | 0.013                         | Oswald et al., 2020                                                                                                                                                                                       |
| Cajanuma valley                  | 2            | 3285.00       | -4.149722    | -79.156944    | terrestrial, bog           | -888888         | 7e-04                         | Villota and Behling, 2014                                                                                                                                                                                 |
| Caledonia Fen                    | 1            | 1280.00       | -37.333300   | 146.733300    | terrestrial, fen           | 0.1             | 0.15                          | Kershaw et al., 2007b                                                                                                                                                                                     |
| Calineasa                        | 1            | 1300.00       | 46.563100    | 22.829200     | terrestrial, bog           |                 | 0.01                          | Feurdean et al., 2009; Feurdean et al., 2020b                                                                                                                                                             |
| Cambara do Sul                   | 1            | 1040.00       | -29.052500   | -50.101100    | terrestrial, bog           | -888888         | 0.00196                       | Behling et al., 2004                                                                                                                                                                                      |
| Cameron's Lagoon                 | 1            | 1045.00       | -41.960000   | 146.680000    | terrestrial, bog           | 1               | 0.0025                        | Thomas and Hope, 1994                                                                                                                                                                                     |
| Camillan Wood                    | 1            | 17.00         | 52.030000    | -9.560000     | terrestrial, small hollow  | -888888         | 0.001                         | Mitchell, 1988                                                                                                                                                                                            |
| Camp Lake Albion County          | 1            | 316.00        | 45.159300    | -94.091600    | lacustrine                 | 17              | 47.76                         | <a href="https://www.ncdc.noaa.gov/paleo-search/study/21051">https://www.ncdc.noaa.gov/paleo-search/study/21051</a>                                                                                       |
| Campbell Lake CA                 | 1            | 1750.00       | 41.532802    | -123.105499   | lacustrine                 | 7.12            | 0.12                          | Briles et al., 2011                                                                                                                                                                                       |
| Campo Lameiro                    | 5            | 295.00        | 42.533300    | -8.516700     | terrestrial                | -888888         | -999999                       | Kaal et al., 2008; Kaal et al., 2011; Kaal et al., 2013; López-Merino et al., 2012                                                                                                                        |
| Cana Swamp                       | 1            | 500.00        | 7.750000     | -77.580000    | terrestrial, fen           | -888888         | 1                             | Bush and Colinvaux, 1994                                                                                                                                                                                  |
| Canada de la Cruz                | 1            | 1595.00       | 38.067500    | -2.687500     | lacustrine                 | 1               | 0.6875                        | Carrión et al., 2001b                                                                                                                                                                                     |
| Canada del Gitano Sierra de Baza | 1            | 1900.00       | 37.233300    | -2.700000     | terrestrial, bog           | -888888         | 2                             | Carrión et al., 2007                                                                                                                                                                                      |

| Site name                   | Entities (#) | Elevation (m) | Latitude (°) | Longitude (°) | Site Type                   | Water depth (m) | Basin size (km <sup>2</sup> ) | Citation(s)                                                                                   |
|-----------------------------|--------------|---------------|--------------|---------------|-----------------------------|-----------------|-------------------------------|-----------------------------------------------------------------------------------------------|
| Canal de la Puntilla        | 1            | 120.00        | -40.952500   | -72.905000    | terrestrial, fen            | -888888         | -999999                       | Moreno, 1997                                                                                  |
| Canoe                       | 1            | 166.00        | 53.048890    | -57.671750    | lacustrine                  | 0.637           | 3.63                          | Umbanhowar Jr and Camill, 2020                                                                |
| Cantarrana                  | 1            | 36.00         | 10.430000    | -84.000000    | terrestrial, bog            | 0.01            | 0.005                         | Kennedy and Horn, 2007                                                                        |
| Caohu Lake                  | 1            | -999999.00    | 31.560000    | 117.390000    | lacustrine                  | 2.69            | 825                           | Wu et al., 2008                                                                               |
| Caotianhu relic site        | 1            | 380.00        | 44.420000    | 113.020000    | terrestrial, bog            | -888888         | -999999                       | Zhang et al., 2014                                                                            |
| Carajas                     | 1            | 250.00        | -6.000000    | -50.160000    | lacustrine                  |                 |                               | Cordeiro et al., 2008                                                                         |
| CASA                        | 3            | 270.00        | 49.552292    | -78.987178    | terrestrial, bog            | -888888         | -999999                       | Beaulne et al., 2021                                                                          |
| Castello Lagoon             | 1            | 2.40          | 42.281556    | 3.099528      | coastal                     | 1               | 2.2                           | Ejarque et al., 2016                                                                          |
| Castor                      | 1            | 220.00        | 46.613900    | -72.998900    | lacustrine                  | -999999         | 0.001                         | Carcaillet and Richard, 2000                                                                  |
| Catas Altas                 | 1            | 755.00        | -20.083333   | -43.366670    | terrestrial, soil           | -888888         | -999999                       | Behling and Lichte, 1997                                                                      |
| Cedar Lake CA               | 1            | 1740.00       | 41.207395    | -122.496677   | lacustrine                  | 2.6             | 0.04                          | Whitlock et al., 2004                                                                         |
| Cederberg Pakhuisch         | 1            | 460.00        | -32.100000   | 19.060000     | terrestrial                 |                 |                               | Scott and Woodborne, 2007                                                                     |
| Cedres Lake                 | 1            | 307.00        | 49.346000    | -79.208000    | lacustrine                  | 16              | 0.04                          | Ali et al., 2008                                                                              |
| Cenote Kail                 | 2            | 1534.00       | 16.000000    | -91.554000    | lacustrine                  | -777777         | -999999                       | Harvey et al., 2019                                                                           |
| Cepicko polje               | 1            | 27.00         | 45.190000    | 14.159100     | lacustrine, drained lake    | 0               | 1.2                           | Balbo et al., 2006; Balbo, Unpublished; Feurdean et al., 2020b                                |
| Cepkeliai                   | 1            | 131.00        | 54.010000    | 24.617000     | terrestrial, bog            | -888888         | 58.58                         | Stančikaitė et al., 2019a                                                                     |
| Cerna Horna                 | 1            | 1190.00       | 50.660000    | 15.750000     | -777777                     |                 |                               | Speranza et al., 2000                                                                         |
| Cerro Toledo                | 2            | 3244.00       | -4.116083    | -79.172056    | terrestrial, bog            |                 | -999999                       | Brunschön and Behling, 2009                                                                   |
| Cha das Lameiras            | 2            | 950.00        | 40.942800    | -7.676100     | terrestrial                 | -888888         | -999999                       | López-Sáez et al., 2017a                                                                      |
| Chai-ku Lake                | 1            | 129.00        | 62.000000    | 130.060000    | lacustrine                  | 1               | 0.44                          | Katamura et al., 2009b                                                                        |
| Champ Gazon                 | 1            | 585.00        | 47.203333    | 4.048611      | terrestrial, bog            | -888888         | 0.2                           | Jouffroy-Bapicot et al., 2013; Jouffroy-Bapicot, 2010                                         |
| Chang Cheng Cun             | 2            | 1400.00       | 35.870000    | 106.780000    | terrestrial, loess          |                 | -999999                       | Tan et al., 2018                                                                              |
| Changwu County              | 1            | -999999.00    | 35.150000    | 107.930000    | fluvial                     |                 | -999999                       | Zhao, 2005                                                                                    |
| Chapple Vale Swamp          | 1            | 30.00         | -38.620000   | 143.320000    | terrestrial, fen            | 0               |                               | McKenzie and Kershaw, 1997                                                                    |
| Charco da Candieira         | 1            | 1409.00       | 40.343600    | -7.578100     | lacustrine                  | 0.5             | 0.008                         | Connor et al., 2012; van der Knaap and van Leeuwen, 1995; van der Knaap and van Leeuwen, 1997 |
| Chasseur Lake               | 1            | 275.00        | 47.745775    | -79.087453    | lacustrine                  | 5.2             | 0.0015                        | Paillard, Unpublished                                                                         |
| Chatsworth Bog              | 1            | 290.00        | 40.675830    | -88.323060    | terrestrial, fen            | 1               | 0.25                          | Nelson et al., 2006                                                                           |
| Cheinu                      | 3            | 461.00        | 52.647000    | -72.192600    | terrestrial, fen            | -888888         | 0.148                         | Robitaille et al., 2021                                                                       |
| Chenghai Lake               | 2            | 1509.00       | 26.450000    | 100.630000    | lacustrine                  | 31.8            | 77.2                          | Xiao et al., 2018                                                                             |
| Chengjiang River            | 1            | 1721.00       | 24.420000    | 102.870000    | lacustrine, tectonic origin | 81.2            | 212                           | Sun et al., 2018                                                                              |
| Chengzishan site            | 1            | 553.00        | 41.310000    | 119.480000    | archaeological site         |                 | -999999                       | Zhao et al., 2011                                                                             |
| Cheremushuka bog            | 1            | 462.00        | 52.750000    | 108.080000    | terrestrial, mire           | -888888         | 0.5                           | Krivosogov et al., 2004; Shichi et al., 2009                                                  |
| Chiba Lake                  | 1            | -999999.00    | 29.580000    | 113.000000    | lacustrine, fluvial origin  | 6               | -999999                       | Gao, 2017                                                                                     |
| Chichi (Changbai Mountains) | 1            | 1832.00       | 42.000000    | 128.000000    | terrestrial, bog            |                 | 0.5                           | Gao et al., 2016                                                                              |
| Chickaree Lake              | 1            | 2796.00       | 40.334125    | -105.841095   | lacustrine                  | 7.9             | 0.015                         | Dunnette et al., 2014                                                                         |

| Site name                       | Entities (#) | Elevation (m) | Latitude (°) | Longitude (°) | Site Type                  | Water depth (m) | Basin size (km <sup>2</sup> ) | Citation(s)                                                                                                   |
|---------------------------------|--------------|---------------|--------------|---------------|----------------------------|-----------------|-------------------------------|---------------------------------------------------------------------------------------------------------------|
| Chihuahuenos Bog                | 1            | 2925.00       | 36.040000    | -106.500000   | terrestrial, bog           | 3               | 0.023                         | Allen et al., 2008; Anderson et al., 2008a; Anderson et al., 2008b; Anderson, Unpublished; Brunner Jass, 1999 |
| Chopper Lake                    | 1            | -999999.00    | 66.002250    | -146.275320   | lacustrine                 | 9.4             | -999999                       | Kelly et al., 2013                                                                                            |
| Chyornaya Valley                | 1            | 2.00          | 44.560000    | 33.620000     | fluvial                    | 2               |                               | Cordova and Lehman, 2005                                                                                      |
| Clarks Junction                 | 1            | 560.00        | -45.710000   | 170.110000    | terrestrial                | -888888         | -999999                       | McGlone, 2001                                                                                                 |
| Clayoquot Lake                  | 1            | 15.00         | 49.250000    | -125.500000   | lacustrine, glacial origin | 3.8             | 0.47                          | Gavin et al., 2003                                                                                            |
| Clear (COHMAP2k)                | 1            | 513.00        | 43.750000    | -74.016667    | lacustrine                 | 11              | 0.035                         | Gajewski et al., 1987                                                                                         |
| Cliff Palace Pond               | 1            | 424.00        | 37.520000    | -83.920000    | terrestrial, small hollow  | 0.14            | 0.001                         | Delcourt and Delcourt, 1997b; Delcourt et al., 1998                                                           |
| Club Lake                       | 1            | 1995.00       | -36.400000   | 148.310000    | lacustrine                 | 2               | -999999                       | Dodson et al., 1994a                                                                                          |
| Coast Trail Pond                | 1            | 230.00        | 37.980000    | -122.800000   | lacustrine                 | 0               |                               | Anderson, 2005; Rypins et al., 1989                                                                           |
| Cobrico Swamp                   | 1            | 140.00        | -38.300000   | 143.030000    | terrestrial, fen           | 1               | -888888                       | Dodson et al., 1994b                                                                                          |
| Coldwater Lake, McIntosh County | 1            | 596.00        | 46.016660    | -99.066660    | lacustrine                 | 6               | 0.5                           | Umbanhowar Jr, 2004; Xia et al., 1997                                                                         |
| Colonia basin                   | 1            | 700.00        | -23.867500   | -46.707500    | terrestrial, mire          | -999999         | -999999                       | Rodríguez-Zorro et al., 2020                                                                                  |
| Como Lake                       | 1            | 3523.00       | 37.550000    | -105.500000   | lacustrine                 | -999999         | -999999                       | Shafer, 1989                                                                                                  |
| Congping                        | 1            | 2120.00       | 31.400000    | 110.040000    | terrestrial, bog           | 0.1             | 10                            | Dodson et al., 2021                                                                                           |
| Conroy (COHMAP2k)               | 1            | 140.00        | 46.283333    | -67.883333    | lacustrine                 | 33              | 0.105                         | Gajewski et al., 1987                                                                                         |
| Cooley Lake BC                  | 1            | 1515.00       | 49.490867    | -117.645321   | lacustrine                 | 11              | 0.045                         | Gavin et al., 2006                                                                                            |
| Copper Falls Lake               | 1            | 392.00        | 47.417000    | -88.192000    | lacustrine                 | 3               | 0.3                           | Pompeani et al., 2018                                                                                         |
| Core Fr10 95-GC-17              | 1            | -1093.00      | -22.040000   | 113.500000    | marine                     | 1093            |                               | van der Kaars and de Deckker, 2002                                                                            |
| Core Trident 163 31B            | 1            | -3210.00      | -3.620000    | -83.966700    | marine                     |                 |                               | Heusser and Shackleton, 1994                                                                                  |
| Corral Lake                     | 1            | 75.00         | 57.320000    | -100.850000   | lacustrine                 | 7.5             | 0.08                          | Lynch et al., 2004                                                                                            |
| Cothill Fen                     | 1            | 80.00         | 51.697753    | -1.332935     | terrestrial, fen           | -888888         | 0.433                         | Day, 1991                                                                                                     |
| Cotter Source Bog               | 1            | 1755.00       | -35.755000   | 148.857500    | terrestrial, bog           | -888888         | 0.05                          | Jones, 1990                                                                                                   |
| Cotter Source Bog center        | 1            | 1755.00       | -35.960000   | 148.810000    | terrestrial, bog           | 0               |                               | Hope and Clark, 2008                                                                                          |
| Crag Lough                      | 1            | 250.00        | 55.006008    | -2.367383     | lacustrine, glacial origin | 2               | 0.11                          | Dark, 2005                                                                                                    |
| Craigrossie                     | 1            | 112.00        | -29.820000   | 30.990000     | -777777                    | 0               |                               | Scott, 2002                                                                                                   |
| Crane Lake                      | 1            | 2590.00       | 36.716667    | -112.210000   | lacustrine                 | -999999         | -999999                       | Shafer, 1989                                                                                                  |
| Crater Lake Alaska              | 1            | 806.00        | 62.101714    | -146.238431   | lacustrine                 | 4.2             | 0.01                          | Barrett et al., 2013                                                                                          |
| Crater Lake CA                  | 1            | 2288.00       | 41.383600    | -122.579700   | lacustrine                 | 12.15           | 0.06                          | Mohr et al., 2000                                                                                             |
| Crawford Lake Ontario           | 1            | 279.00        | 43.468529    | -79.948817    | lacustrine                 | 28.5            | 0.025                         | Clark and Royall, 1996                                                                                        |
| Creag na Caillich               | 1            | 685.00        | 56.500000    | -4.330000     | terrestrial, bog           | -888888         | -999999                       | Tipping et al., 1993                                                                                          |
| Crevice Lake                    | 2            | 1713.00       | 45.000000    | -110.578000   | lacustrine, glacial origin | 31              | 0.0776                        | Power, Unpublished; Whitlock et al., 2008                                                                     |
| Crominia                        | 1            | 710.00        | -17.270000   | -49.410000    | terrestrial, marsh         | -888888         | -999999                       | Salgado-Labouriau et al., 1997                                                                                |
| Crooked Pond                    | 1            | 28.00         | 41.891667    | 70.650000     | lacustrine                 | 3.5             | 0.09                          | Shuman et al., 2001                                                                                           |
| Crudale Meadow                  | 1            | 9.00          | 59.010000    | -3.320000     | terrestrial, bog           | -888888         | 0.12                          | Bunting, 1994; Edwards et al., 2000                                                                           |

| Site name              | Entities (#) | Elevation (m) | Latitude (°) | Longitude (°) | Site Type                           | Water depth (m) | Basin size (km <sup>2</sup> ) | Citation(s)                                                                                                            |
|------------------------|--------------|---------------|--------------|---------------|-------------------------------------|-----------------|-------------------------------|------------------------------------------------------------------------------------------------------------------------|
| Crystal Lake Minnesota | 1            | 284.00        | 44.333900    | -93.211300    | lacustrine                          | 11              | 1.13                          | <a href="https://www.ncdc.noaa.gov/paleo/study/21054">https://www.ncdc.noaa.gov/paleo/study/21054</a>                  |
| Cubelles               | 1            | 2.00          | 41.200000    | -1.670000     | coastal                             | -888888         | -999999                       | Riera-Mora and Esteban-Amat, 1994                                                                                      |
| Cuddie Springs         | 1            | 127.00        | -30.370000   | 147.310000    | lacustrine, drained lake            | -888888         | 3                             | Field et al., 2002                                                                                                     |
| Cuguron                | 1            | 513.00        | 43.100000    | 0.540000      | terrestrial, mire                   | -888888         | 0.8                           | Vannière and Laggoun-Défarge, 2002                                                                                     |
| Curt Pond              | 1            | 336.00        | 36.900000    | -84.030000    | terrestrial, small hollow           | 0.2             | -999999                       | Cridlebaugh, 1984; Delcourt and Delcourt, 1998; Delcourt et al., 1983; Delcourt et al., 1986; Meeks, 2004; Meeks, 2005 |
| Cvitova                | 1            | 228.00        | 49.215830    | 24.468200     | terrestrial, buried fen             | -888888         | 0.012                         | Feurdean et al., 2020b; Kołaczek et al., 2016                                                                          |
| Cygnat Lake            | 1            | 2530.00       | 44.660000    | -110.610000   | lacustrine, glacial origin          | 6.1             | 0.11                          | Millsbaugh et al., 2000; Millsbaugh, 1997                                                                              |
| Daihai Lake            | 1            | 1221.00       | 40.530000    | 112.670000    | lacustrine                          | 13.1            | 133.5                         | Wang et al., 2013                                                                                                      |
| Daiyunshan Mountain 01 | 1            | 1030.00       | 25.840000    | 118.270000    | terrestrial                         |                 | -999999                       | Zhao et al., 2017a                                                                                                     |
| Daiyunshan Mountain 02 | 1            | 950.00        | 25.770000    | 118.110000    | terrestrial                         |                 | -999999                       | Zhao et al., 2017a                                                                                                     |
| Daktariske             | 1            | 148.00        | 55.800000    | 22.400000     | -777777                             |                 |                               | Rimantienė, 1992                                                                                                       |
| Dalane                 | 1            | 40.00         | 58.244167    | 8.004445      | lacustrine                          | 5.15            | 0.028                         | Eide et al., 2005                                                                                                      |
| Dalhousie Springs      | 1            | 150.00        | -26.410000   | 135.520000    | terrestrial, mound spring or spring | 0               |                               | Boyd, 1990                                                                                                             |
| Dallican Water         | 1            | 56.00         | 60.391670    | -1.100000     | lacustrine                          | 4               | 0.01                          | Bennett et al., 1992                                                                                                   |
| Dallund So North Funen | 1            | 12.00         | 55.480000    | 10.260000     | -777777                             |                 |                               | Bradshaw et al., 2005; Rasmussen and Bradshaw, 2005                                                                    |
| Dalmutladdo            | 1            | 355.00        | 69.166667    | 20.716667     | lacustrine                          | 4               | 0.072                         | Bjune et al., 2004                                                                                                     |
| Dark Lake (COHMAP2k)   | 1            | 335.00        | 45.266667    | -91.466667    | lacustrine                          | 4               | 0.138                         | Gajewski et al., 1985                                                                                                  |
| Daxigou                | 1            | 3450.00       | 43.140000    | 86.910000     | terrestrial                         | 0               |                               | Zhang et al., 2004b                                                                                                    |
| Dead Horse Lake        | 1            | 2248.00       | 42.560600    | -120.778100   | lacustrine, glacial origin          | 0               | 0.15                          | Minckley et al., 2007                                                                                                  |
| Deep Pond Falmouth     | 1            | 23.00         | 41.564087    | -70.635791    | lacustrine                          | -999999         | 0.01                          | Oswald et al., 2020; Parshall et al., 2003                                                                             |
| Deep Taunton           | 1            | 7.00          | 41.882400    | -71.011500    | lacustrine                          | -999999         | 0.015                         | Oswald et al., 2018; Oswald et al., 2020                                                                               |
| DeHerrera Lake         | 1            | 3343.00       | 37.740000    | -107.700000   | lacustrine                          | 0               |                               | Anderson et al., 2008a; Anderson, Unpublished                                                                          |
| Delta del Rio Besos    | 1            | 0.00          | 41.380278    | 2.248333      | terrestrial                         | -888888         | -999999                       | Riera-Mora and Esteban-Amat, 1994                                                                                      |
| Deming Lake Minnesota  | 1            | 464.00        | 47.170177    | -95.168432    | lacustrine                          | 16.6            | 0.054                         | Clark and Royall, 1996                                                                                                 |
| Den Plain              | 1            | 350.00        | -41.502780   | 146.341670    | fluvial                             | -888888         | -999999                       | Moss et al., 2007                                                                                                      |
| Derragh Bog            | 1            | 70.50         | 53.766700    | -7.416700     | terrestrial, bog                    |                 | 0.374                         | Brown et al., 2005a                                                                                                    |
| Derragh Lough          | 1            | 62.00         | 53.761100    | -7.577800     | lacustrine                          | 2               | 0.4                           | Brown et al., 2005a                                                                                                    |
| Derrycunihy Wood       | 1            | 75.00         | 52.010000    | -9.410000     | terrestrial, small hollow           | -888888         | -999999                       | Mitchell, 1988                                                                                                         |
| Desautels              | 1            | 480.00        | 49.457800    | -73.256700    | lacustrine                          | 7               | 0.3                           | Carcaillet and Richard, 2000                                                                                           |

| Site name                | Entities (#) | Elevation (m) | Latitude (°) | Longitude (°) | Site Type                      | Water depth (m) | Basin size (km <sup>2</sup> ) | Citation(s)                                                                                           |
|--------------------------|--------------|---------------|--------------|---------------|--------------------------------|-----------------|-------------------------------|-------------------------------------------------------------------------------------------------------|
| Deuce Lake               | 1            | 170.00        | 65.516670    | -147.516700   | lacustrine, thermokarst origin | 5               | 0.03                          | Lynch et al., 2002                                                                                    |
| Dimple Lake Alaska       | 1            | 394.00        | 69.956951    | -150.201839   | lacustrine                     | 8               | 0.1                           | Hu et al., 2010                                                                                       |
| Dingnan County           | 1            | 250.00        | 24.750000    | 115.030000    | fluvial                        |                 | -999999                       | Dodson et al., 2006                                                                                   |
| Doe HF                   | 1            | 79.00         | 42.175400    | -72.702400    | lacustrine                     | -999999         | 0.014                         | Oswald et al., 2018; Oswald et al., 2020                                                              |
| Doel                     | 1            | -1.00         | 51.320830    | 4.245270      | coastal, estuarine             | -888888         | -888888                       | Deforce, 2011                                                                                         |
| Dog Lake                 | 1            | 1183.00       | 50.760000    | -116.100000   | lacustrine                     | 4.7             | 0.151                         | Hallett and Walker, 2000                                                                              |
| Doge Doge Swamp          | 1            | 8.00          | -17.900000   | 177.270000    | terrestrial, bog               | 0.5             | 0.05                          | Hope et al., 2009                                                                                     |
| Dolbeau                  | 1            | 965.00        | 48.966900    | -65.955800    | lacustrine                     | 0.45            | 0.031                         | Carcaillet and Richard, 2000                                                                          |
| Dom Lake                 | 1            | 470.00        | 49.439660    | -89.632040    | lacustrine                     | 6               | 0.031                         | Senici et al., 2015                                                                                   |
| Dongganchi site          | 1            | 49.00         | 40.200000    | 116.000000    | terrestrial                    | -777777         |                               | Zhang et al., 1996; Zhang et al., 1997; Zhang et al., 1999                                            |
| Dongxiafeng North        | 1            | 500.00        | 35.250000    | 111.350000    | archaeological site            |                 | -999999                       | Huang et al., 2006                                                                                    |
| Dongxiafeng South        | 1            | 500.00        | 35.150000    | 111.350000    | archaeological site            |                 | -999999                       | Huang et al., 2006                                                                                    |
| Doroo Nuur               | 1            | 2394.00       | 48.245900    | 90.663900     | lacustrine                     | 9.1             | 14.12                         | Umbanhowar Jr et al., 2009                                                                            |
| Dragonfly Lake           | 1            | 760.00        | 60.811944    | -135.340000   | lacustrine                     | 2               | 0.06                          | Edwards et al., 2015                                                                                  |
| Duarte Pond HF           | 1            | 15.00         | 41.420000    | -70.615500    | lacustrine                     | 3               | 0.014                         | Foster et al., 2002b                                                                                  |
| Dubh-Lochan              | 1            | 150.00        | 57.290000    | -4.430000     | lacustrine, glacial origin     | 3.5             | 0.012                         | Froyd, 2006                                                                                           |
| Dublin Bog               | 1            | 710.00        | -41.720000   | 146.230000    | terrestrial, bog               | -888888         | 0.5                           | Colhoun et al., 1991                                                                                  |
| Dubrava Wood             | 1            | 190.00        | 48.867300    | 17.102400     | terrestrial, bog               |                 | -999999                       | Jamrichová et al., 2017                                                                               |
| Duck Pond Naushon        | 1            | 3.00          | 41.494745    | -70.714160    | lacustrine                     | 18              | -999999                       | Oswald, Unpublished                                                                                   |
| Duck Pond Wellfleet      | 1            | 2.50          | 41.932448    | -70.000651    | lacustrine                     | 18              | 0.051                         | Winkler, 1985                                                                                         |
| Duguldzeiri River bog    | 1            | 529.00        | 54.450000    | 109.530000    | terrestrial, mire              | -888888         | -777777                       | Krivosnogov et al., 2004; Takahara and Krivosnogov, Unpublished                                       |
| Dukes Tarn               | 1            | 830.00        | -44.964180   | 168.492690    | lacustrine                     | -999999         | 0.015                         | McWethy et al., 2014                                                                                  |
| Duliha bog               | 1            | 510.00        | 51.510000    | 105.000000    | terrestrial, mire              | -888888         | -999999                       | Krivosnogov et al., 2004; Takahara and Krivosnogov, Unpublished                                       |
| Dune Lake                | 1            | 134.00        | 64.416670    | -149.900000   | lacustrine                     | 9               | 0.12                          | Lynch et al., 2002                                                                                    |
| Durchenbergried          | 1            | 432.00        | 47.783333    | 8.983333      | terrestrial, bog               | 0               | 0.0225                        | Rösch, 1986; Rösch, 1997                                                                              |
| Durnoye                  | 1            | 118.00        | 55.090000    | 40.893900     | terrestrial, bog               |                 | 0.03                          | Feurdean et al., 2020b; Novenko et al., 2016b                                                         |
| Dyanushka                | 1            | 33.00         | 65.030000    | 125.030000    | terrestrial, bog               | -777777         |                               | Werner et al., 2005                                                                                   |
| E5                       | 1            | 805.00        | 68.640000    | -149.460000   | lacustrine                     | 12              | 0.1                           | Vachula et al., 2019                                                                                  |
| Eagle Lake Carver County | 1            | 294.00        | 44.808700    | -93.933600    | lacustrine                     | 4               | 0.74                          | <a href="https://www.ncdc.noaa.gov/paleo/study/21055">https://www.ncdc.noaa.gov/paleo/study/21055</a> |
| Eagle Pond HF            | 1            | 11.00         | 41.698000    | -70.137000    | lacustrine                     | 6.4             | 0.04                          | Oswald et al., 2020; Parshall et al., 2003                                                            |
| East Lake                | 1            | 2863.00       | 37.170000    | -119.020000   | lacustrine, glacial origin     | 5               |                               | Power, 1998                                                                                           |
| East Moor                | 1            | 250.00        | 50.530000    | -4.470000     | terrestrial, bog               | -888888         | -999999                       | Gearey et al., 2000                                                                                   |
| East Sooke Fen           | 1            | 155.00        | 48.351900    | -123.681700   | terrestrial, fen               | -888888         | 0.001                         | Brown and Hebda, 2002; Brown et al., 2006                                                             |
| EC01 (North Quebec)      | 1            | 250.00        | 56.280000    | -75.100000    | lacustrine                     | 8.65            | 0.04                          | Gajewski, 2019                                                                                        |

| Site name                                           | Entities (#) | Elevation (m) | Latitude (°) | Longitude (°) | Site Type                   | Water depth (m) | Basin size (km <sup>2</sup> ) | Citation(s)                                                                    |
|-----------------------------------------------------|--------------|---------------|--------------|---------------|-----------------------------|-----------------|-------------------------------|--------------------------------------------------------------------------------|
| EC02 (North Quebec)                                 | 1            | 260.00        | 56.020000    | -74.950000    | lacustrine                  | 8.85            | 0.025                         | Gajewski, 2019                                                                 |
| EC03 (North Quebec)                                 | 1            | 279.00        | 56.020000    | -74.980000    | lacustrine                  | 4.18            | 0.025                         | Gajewski, 2019                                                                 |
| Egg Lagoon                                          | 1            | 20.00         | -39.650000   | 143.950000    | terrestrial, bog            | 0               |                               | D'Costa et al., 1993                                                           |
| El Brezosa                                          | 2            | 733.00        | 39.349100    | -4.361100     | terrestrial, bog            | -888888         | 0.106                         | Morales-Molino et al., 2018                                                    |
| El Carrizal                                         | 1            | 860.00        | 41.318500    | -4.145000     | lacustrine                  | 1.5             | 0.11                          | Franco-Múgica et al., 2005                                                     |
| El Patia                                            | 1            | 760.00        | 2.030000     | -77.000000    | lacustrine                  | -888888         | 0.018                         | Vélez et al., 2005                                                             |
| El Payo mire                                        | 4            | 1000.00       | 40.253500    | 6.771200      | terrestrial, fen            | -888888         | -999999                       | Silva Sánchez et al., 2016                                                     |
| El Perro mire                                       | 1            | 690.00        | 39.051300    | -4.759600     | terrestrial, mire           | -888888         | 3.3                           | Luelmo-Lautenschlaeger et al., 2019a; Luelmo-Lautenschlaeger et al., 2019b     |
| El Portalet                                         | 2            | 1802.00       | 42.798990    | -0.398830     | terrestrial, bog            | -888888         | 0.1                           | González-Sampéris et al., 2006                                                 |
| El Redondo                                          | 2            | 1765.00       | 40.221400    | -5.656900     | terrestrial, bog            | -888888         | 0.00125                       | López-Sáez et al., 2016a                                                       |
| El Salto                                            | 1            | 67.00         | -41.640000   | -73.090000    | lacustrine                  | -777777         |                               | Alloway et al., 2017; Moreno and Videla, 2016                                  |
| El Tiemblo                                          | 1            | 1250.00       | 40.357500    | -4.526300     | terrestrial, bog            | -888888         | 2e-04                         | López-Sáez et al., 2017b                                                       |
| El Tiro Bog                                         | 1            | 2810.00       | -3.840000    | -79.140000    | terrestrial, bog            | -888888         | -999999                       | Niemann and Behling, 2008                                                      |
| ELA-320 Lake                                        | 1            | 370.00        | 49.500000    | -93.500000    | lacustrine                  | 17.3            | 0.045                         | Lynch et al., 2004                                                             |
| Elferdalen                                          | 1            | 380.00        | 59.650000    | 9.300000      | terrestrial, bog            | -777777         |                               | Tryterud, 2000                                                                 |
| Elim                                                | 1            | 1757.00       | -28.510000   | 28.500000     | lacustrine                  | 1               |                               | Scott, 2002                                                                    |
| Ely (COHMAP2k)                                      | 1            | 384.00        | 41.766667    | -75.833333    | lacustrine                  | -999999         | 0.129                         | Gajewski et al., 1987                                                          |
| Enos Lake                                           | 1            | 50.00         | 49.280000    | -124.150000   | lacustrine                  | -999999         | 0.18                          | Brown et al., 2006                                                             |
| Epilobium Lake                                      | 1            | 366.00        | 65.972480    | -145.567120   | lacustrine                  | 13.1            | -999999                       | Kelly et al., 2013                                                             |
| Erethizon Lake                                      | 1            | -999999.00    | 61.599383    | -161.160417   | lacustrine                  | 4.1             | 0.43                          | Higuera, Unpublished; Hu, 2015                                                 |
| Erhai Lake                                          | 1            | 1974.00       | 25.760000    | 100.200000    | lacustrine, tectonic origin | 10.8            |                               | Jing et al., 2003                                                              |
| Erlongwan Maar Lake                                 | 1            | 724.00        | 42.300000    | 126.380000    | lacustrine, volcanic lake   | 36              | 0.3                           | Li et al., 2013                                                                |
| Ertangcun                                           | 1            | 1050.00       | 35.150000    | 107.800000    | archaeological site         |                 | -999999                       | Huang et al., 2006                                                             |
| Esambu                                              | 1            | 1191.00       | -2.711913    | 37.554357     | -777777                     |                 |                               | Courtney-Mustaphi et al., 2015; Githumbi et al., 2018a; Githumbi et al., 2018b |
| Eski Acigol                                         | 1            | 1270.00       | 38.550000    | 34.540000     | lacustrine, drained lake    | -888888         | 0.2                           | Turner et al., 2008                                                            |
| Espinosa de Cerrato                                 | 1            | 885.00        | 41.956700    | -3.935000     | terrestrial, marsh          | -888888         | 0.088                         | Morales-Molino et al., 2017b                                                   |
| Estacion Cientifica San Francisco Cerro de Consuelo | 1            | 3155.00       | -4.002444    | -79.059583    | terrestrial, soil           |                 | -999999                       | Niemann and Behling, 2009a                                                     |
| Estacion Cientifica San Francisco Refugio           | 1            | 1534.00       | 16.000000    | -91.554000    | terrestrial, soil           |                 | -999999                       | Niemann and Behling, 2009a                                                     |
| Estacion Cientifica San Francisco T2250             | 1            | 3495.00       | -4.730417    | -79.424064    | terrestrial, soil           |                 | -999999                       | Niemann and Behling, 2009a                                                     |
| Etang de la Gruere                                  | 2            | 1005.00       | 47.240600    | 7.050000      | terrestrial, bog            |                 | 0.225                         | Roos-Barraclough et al., 2004                                                  |
| Etu-Mustajarvi                                      | 1            | 157.00        | 60.980000    | 25.000000     | lacustrine                  | 9               | 0.045                         | Sarmaja-Korjonen, 1998                                                         |
| Eustach                                             | 1            | 387.00        | 50.890667    | 14.428425     | terrestrial, bog            | -888888         | 0.005                         | Bobek et al., 2017                                                             |

| Site name                     | Entities (#) | Elevation (m) | Latitude (°) | Longitude (°) | Site Type                  | Water depth (m) | Basin size (km <sup>2</sup> ) | Citation(s)                                                                                           |
|-------------------------------|--------------|---------------|--------------|---------------|----------------------------|-----------------|-------------------------------|-------------------------------------------------------------------------------------------------------|
| Evoran Pond                   | 1            | 194.00        | -18.760000   | 169.010000    | lacustrine                 | -777777         |                               | Hope, Unpublished                                                                                     |
| Eweburn Bog                   | 1            | 320.00        | -45.320000   | 167.800000    | terrestrial, bog           | 0               |                               | Ogden et al., 1998                                                                                    |
| Excelsior Basin               | 2            | 2631.00       | 52.783333    | -117.116667   | lacustrine                 | -999999         | -999999                       | Kearney and Luckman, 1983a                                                                            |
| Fargesia die-off soil profile | 1            | -999999.00    | 33.660000    | 107.795000    | terrestrial                |                 | -999999                       | Rayle et al., 2015                                                                                    |
| Fariya Lake                   | 2            | 225.00        | 59.848333    | -111.291111   | lacustrine                 | 5.6             | 0.012                         | Larsen and MacDonald, 1998; Larsen et al., 2000; Larsen, 1994                                         |
| Fazendo do Pinto              | 1            | 900.00        | -29.400000   | -50.560000    | terrestrial, mire          | -888888         | -999999                       | Behling et al., 2001                                                                                  |
| Fenton Cottage                | 1            | 200.00        | 53.840005    | -2.928430     | terrestrial, mire          | -888888         | -999999                       | Wells et al., 1997                                                                                    |
| Ferry Lake                    | 1            | 25.00         | 46.010000    | -92.130000    | lacustrine, glacial origin | 12              |                               | Jensen et al., 2007                                                                                   |
| Fish                          | 1            | 423.00        | 43.850000    | -95.040000    | lacustrine                 | -777777         |                               | Clark et al., 2001                                                                                    |
| Fish Lake Le Sueur County     | 1            | 310.00        | 44.227400    | -93.664800    | lacustrine                 | 16.7            | 0.31                          | <a href="https://www.ncdc.noaa.gov/paleo/study/21058">https://www.ncdc.noaa.gov/paleo/study/21058</a> |
| Fish Lake Scott County        | 1            | 288.00        | 44.649200    | -93.459700    | lacustrine                 | 8.5             | 0.7                           | <a href="https://www.ncdc.noaa.gov/paleo/study/21064">https://www.ncdc.noaa.gov/paleo/study/21064</a> |
| Five Lakes                    | 1            | 780.00        | 48.080000    | -118.920000   | lacustrine                 | 2.84            |                               | Scharf, 2010                                                                                          |
| Fleck's Loch Bog, Foula       | 1            | 170.00        | 60.146022    | -2.093045     | terrestrial, bog           | -888888         | -999999                       | van Leeuwen and van der Knaap, 2008                                                                   |
| Flotatjonn                    | 1            | 890.00        | 59.670270    | 7.540550      | lacustrine                 | 8               | -999999                       | Birks, 2006                                                                                           |
| Folly                         | 1            | 133.00        | 45.458260    | -75.777750    | terrestrial, bog           |                 | 0.14                          | Blarquez et al., 2018                                                                                 |
| Forest Pond 1                 | 1            | 2797.00       | 43.471667    | -109.938889   | lacustrine                 | 0.5             | -999999                       | Lynch, 1995; Lynch, 1998                                                                              |
| Forest Pond 2                 | 1            | 2766.00       | 43.438889    | -109.950000   | lacustrine                 | 0.5             | -999999                       | Lynch, 1995; Lynch, 1998                                                                              |
| Fox Lake Martin County        | 1            | 381.00        | 43.675280    | -94.692220    | lacustrine                 | 6               | 3.85                          | Umbanhowar Jr, Unpublished                                                                            |
| Fox Lake Yukon                | 1            | -999999.00    | 68.009783    | -160.170133   | lacustrine                 | 6               | 0.02                          | Higuera, Unpublished; Hu, 2015                                                                        |
| Foy                           | 2            | 1006.00       | 48.160000    | -114.350000   | lacustrine                 | 39.9            |                               | Power et al., 2006                                                                                    |
| Fred South Swamp              | 1            | 27.00         | -38.130000   | 141.780000    | terrestrial, bog           | 1               | 0.012                         | Builth et al., 2008                                                                                   |
| Fresh Pond Falmouth HF        | 1            | 6.00          | 41.593500    | -70.533800    | lacustrine                 | 5.9             | 0.053                         | Oswald et al., 2020; Parshall et al., 2003                                                            |
| Frozen Lake                   | 1            | 1180.00       | 49.600000    | -121.460000   | lacustrine                 | 17              | 0.03                          | Hallett et al., 2003                                                                                  |
| Frying Pan Lake               | 1            | 2720.00       | 38.616667    | -111.666667   | lacustrine                 | -999999         | -999999                       | Shafer, 1989                                                                                          |
| Fuente de la Leche            | 1            | 1382.00       | 40.346800    | -5.056900     | terrestrial, bog           | -888888         | -999999                       | Robles-López et al., 2018                                                                             |
| Fuente del Pino Blanco        | 1            | 1343.00       | 40.236300    | -4.977600     | terrestrial, bog           | -888888         | 0.0137                        | Robles-López et al., 2018                                                                             |
| Fuldera-Palu Lunga            | 1            | 1822.00       | 46.610000    | 10.360000     | terrestrial, bog           | -888888         | 0.01                          | Stahli et al., 2006                                                                                   |
| Fuller Lake Stearns County    | 1            | 292.00        | 45.420600    | -94.074300    | lacustrine                 | 8.5             | 0.12                          | <a href="http://www.ncdc.noaa.gov/paleo/study/21057">http://www.ncdc.noaa.gov/paleo/study/21057</a>   |
| Funduzi                       | 1            | 429.00        | -22.850000   | 30.890000     | lacustrine                 | 0               |                               | Scott, 2002                                                                                           |
| Fur Lake                      | 1            | 288.00        | 46.710217    | -78.789733    | lacustrine                 | 5.5             | 0.0725                        | Paillard, Unpublished                                                                                 |
| Fusedame                      | 1            | 120.00        | 35.080000    | 136.180000    | lacustrine                 | 0               |                               | Nishimura, Unpublished                                                                                |
| Gabarn                        | 1            | 525.00        | 43.170000    | -0.550000     | terrestrial, bog           | 0               |                               | Rius et al., 2009                                                                                     |
| Gaillard                      | 2            | 392.00        | 50.113270    | -68.808760    | terrestrial, bog           | -888888         | -999999                       | Unpublished                                                                                           |
| Gallaghers Swamp              | 1            | 535.00        | -34.490300   | 150.723000    | terrestrial, bog           | -888888         | 0.18                          | Hope and Macphail, 2005; Hope, 2010                                                                   |



| Site name                | Entities (#) | Elevation (m) | Latitude (°) | Longitude (°) | Site Type                         | Water depth (m) | Basin size (km <sup>2</sup> ) | Citation(s)                                                                                                             |
|--------------------------|--------------|---------------|--------------|---------------|-----------------------------------|-----------------|-------------------------------|-------------------------------------------------------------------------------------------------------------------------|
| Galway Tarn              | 1            | 130.00        | -43.408300   | 169.873300    | lacustrine                        | 5.5             | -999999                       | Vandergoes et al., 2013                                                                                                 |
| Gammelheimenvatnet       | 1            | 290.00        | 68.482220    | 17.759440     | lacustrine                        | 4.8             | -999999                       | Bjune et al., 2008                                                                                                      |
| Ganbold Nuur             | 1            | 2102.00       | 51.334600    | 98.875533     | lacustrine                        | 21.9            | 0.12                          | <a href="http://www.ncdc.noaa.gov/paleo/study/20513">http://www.ncdc.noaa.gov/paleo/study/20513</a> ;<br>Robinson, 2007 |
| Gaoyao County            | 2            | 29.00         | 22.900000    | 112.340000    | terrestrial, bog                  |                 | -999999                       | Ma et al., 2018b                                                                                                        |
| Garba Guracha            | 1            | 3950.00       | 6.881938     | 39.871212     | lacustrine                        | 6               | 0.15                          | Gil-Romera et al., 2019                                                                                                 |
| Gasak II                 | 1            | 81.00         | 52.460000    | 19.391266     | terrestrial, bog                  |                 | -999999                       | Wacnik et al., 2011                                                                                                     |
| Gazwa                    | 1            | 155.00        | 53.872500    | 21.219722     | terrestrial, bog                  | -888888         | 2.05                          | Marcisz et al., 2017                                                                                                    |
| GB01 (North Quebec)      | 1            | 325.00        | 55.120000    | -75.250000    | lacustrine                        | 4.82            | 0.07                          | Gajewski, 2019                                                                                                          |
| GB02 (North Quebec)      | 1            | 300.00        | 55.100000    | -75.280000    | lacustrine                        | 4.8             | 0.05                          | Gajewski, 2019                                                                                                          |
| Geais Lake               | 1            | 280.00        | 49.892280    | -78.655100    | lacustrine                        | 10.15           | 0.037                         | Ali et al., 2009                                                                                                        |
| Gem Lake Colorado        | 1            | 3101.00       | 40.881000    | -106.734000   | lacustrine                        | 6.5             | 0.028                         | Calder et al., 2015                                                                                                     |
| Gentry Lake              | 1            | 270.00        | -12.170000   | -69.090000    | lacustrine                        | 3               | 0.35                          | Bush et al., 2007b                                                                                                      |
| GeoB1023-5               | 1            | -1978.00      | -17.157217   | 11.011667     | marine                            | -888888         | -888888                       | Shi et al., 1998                                                                                                        |
| Geral                    | 1            | 130.00        | -1.640000    | -53.590000    | lacustrine                        | 6               | 3                             | Bush et al., 2000                                                                                                       |
| Ghab                     | 1            | 240.00        | 35.650000    | 36.250000     | lacustrine,<br>drained lake       | -888888         | -999999                       | Yasuda et al., 2000                                                                                                     |
| Ginini Flats             | 2            | 1590.00       | -35.310000   | 148.460000    | terrestrial, bog                  | 0               |                               | Hope et al., 2005                                                                                                       |
| Ginkunai Lake            | 1            | 107.00        | 55.950000    | 23.338600     | lacustrine                        | -999999         | 0.722                         | Stančikaitė et al., 2015                                                                                                |
| Glaswaldsee              | 1            | 839.00        | 48.426166    | 8.246156      | lacustrine,<br>glacial origin     | 11              | 0.029                         | Rösch, 2009                                                                                                             |
| Gleboczek                | 1            | 110.00        | 53.868066    | 18.209629     | terrestrial, bog                  | -888888         | 0.001                         | Lamentowicz et al., 2019                                                                                                |
| Glendhu Bog              | 1            | 600.00        | -45.833300   | 169.750000    | terrestrial, bog                  | -888888         | 0.036                         | McGlone and Wilmshurst, 1999                                                                                            |
| Glenmire                 | 1            | 399.00        | 37.990000    | -122.770000   | terrestrial, bog                  | -888888         | -999999                       | Scott and Woodborne, 2007                                                                                               |
| Gold Creek Lake          | 1            | 2917.00       | 40.781000    | -106.678000   | lacustrine                        | 10.6            | 0.037                         | Calder et al., 2015                                                                                                     |
| Golebiewo I              | 1            | 130.00        | 54.450000    | 18.500000     | terrestrial, bog                  |                 | 0.06                          | Latałowa et al., 2013; Pędziszewska and Latałowa, 2016; Święta-Musznicka et al., 2021                                   |
| Gonghe Basin             | 1            | 3780.00       | 35.650000    | 101.100000    | terrestrial                       |                 | 13800                         | Miao et al., 2017                                                                                                       |
| Gooches Swamp            | 1            | 960.00        | -33.450000   | 150.260000    | terrestrial, fen                  | -888888         | 0.4                           | Black and Mooney, 2006                                                                                                  |
| Goose Lake Meeker County | 1            | 334.00        | 44.985500    | -94.586300    | lacustrine                        | 3.5             | 0.48                          | <a href="https://www.ncdc.noaa.gov/paleo/study/21066">https://www.ncdc.noaa.gov/paleo/study/21066</a>                   |
| Gorenje jezero           | 2            | 550.00        | 45.740000    | 14.408300     | terrestrial, mire                 | 0.1             | 0.1                           | Andrič and Willis, 2003; Andrič, 2004; Andrič, Unpublished; Feurdean et al., 2020b                                      |
| Gorgo Basso              | 1            | 6.00          | 37.610000    | 12.650000     | lacustrine                        | 10              | 0.03                          | Tinner, 2008                                                                                                            |
| Gourte Mires             | 1            | 291.00        | 51.060000    | -3.670000     | terrestrial, mire                 |                 | -999999                       | Fyfe et al., 2003                                                                                                       |
| Graham Lake              | 1            | 381.00        | 45.183300    | -77.350000    | -777777                           | -999999         | 0.025                         | Fuller, 1997                                                                                                            |
| Granger Lake             | 1            | -999999.00    | 66.057540    | -145.652090   | lacustrine                        | 9.5             | -999999                       | Kelly et al., 2013                                                                                                      |
| Grauthelleren            | 1            | 80.00         | 58.144160    | 7.913610      | lacustrine                        | 7.8             | -999999                       | Birks, 2006                                                                                                             |
| Green HF                 | 1            | 82.00         | 42.566800    | -72.511100    | lacustrine                        | -999999         | 0.05                          | Oswald et al., 2018; Oswald et al., 2020                                                                                |
| Green Pond               | 1            | 80.00         | 42.566800    | -72.511000    | lacustrine                        | 5.7             | 0.05                          | Fuller et al., 1998; Parshall and Foster, 2002                                                                          |
| Greenpepper Lake         | 1            | 207.00        | 66.089000    | -146.730000   | lacustrine,<br>thermokarst origin | 15.5            | 1.5                           | Anderson et al., 2019                                                                                                   |
| Greens Bush              | 1            | 160.00        | -38.430000   | 144.930000    | coastal                           | 0               |                               | Jenkins, 1992                                                                                                           |

| Site name                           | Entities (#) | Elevation (m) | Latitude (°) | Longitude (°) | Site Type                  | Water depth (m) | Basin size (km <sup>2</sup> ) | Citation(s)                               |
|-------------------------------------|--------------|---------------|--------------|---------------|----------------------------|-----------------|-------------------------------|-------------------------------------------|
| Grey Pole Swamp<br>Broughton Island | 1            | 9.00          | -32.610000   | 152.310000    | terrestrial, bog           | 0               |                               | Horn, 2005                                |
| Griblje                             | 1            | 160.00        | 45.567500    | 15.281900     | terrestrial, marsh         | 0.01            | 0.008                         | Andrič, 2011; Feurdean et al., 2020b      |
| Griblje Marsh                       | 1            | 160.00        | 45.560000    | 15.270000     | -777777                    | 0               |                               | Andrič, 2007                              |
| Griffith Swamp                      | 1            | 20.00         | -33.280000   | 151.000000    | terrestrial, bog           | 0.1             |                               | Mooney et al., 2007                       |
| Grosser Krebssee                    | 1            | 5.00          | 52.850000    | 14.099300     | lacustrine                 | 7.5             | 0.3                           | Jahns, 2000                               |
| Grosser Treppensee                  | 1            | 52.20         | 52.150000    | 14.452778     | lacustrine                 | 5.55            | 0.71                          | Giesecke, 2001                            |
| Grostjorna Setesdal<br>Valley       | 1            | 180.00        | 58.533300    | 7.733300      | lacustrine                 | 9.5             | 0.03                          | Eide et al., 2005                         |
| Grusha Lake                         | 1            | 2413.00       | 50.383300    | 89.416700     | lacustrine, glacial origin | 3.5             | 1.6                           | Blyakharchuk et al., 2007                 |
| Gushantun bogs                      | 1            | 500.00        | 42.000000    | 126.000000    | terrestrial, bog           |                 | 0.79                          | Zhao et al., 2015                         |
| Gutian wetland                      | 2            | 1677.00       | 26.090000    | 110.370000    | terrestrial, bog           |                 | -999999                       | Ma et al., 2018b                          |
| Haeapugua                           | 1            | 1650.00       | -5.830000    | 142.780000    | terrestrial, marsh         | -888888         |                               | Haberle and Ledru, 2001                   |
| Haerbaling (Changbai<br>Mountains)  | 1            | 550.00        | 43.300000    | 128.600000    | terrestrial, bog           |                 | 9.17                          | Gao et al., 2016                          |
| Haircut Lake                        | 2            | 1000.00       | 60.515555    | -133.205555   | lacustrine                 | 8.64            | 0.1                           | Edwards et al., 2015                      |
| Halledammen<br>Hallands Vadero      | 1            | NA            | 56.440000    | 12.570000     | -777777                    |                 |                               | Molinari, 2002                            |
| Hanlongwan maar<br>lake             | 1            | 700.00        | 42.680000    | 126.500000    | lacustrine, drained lake   | 0               | 0.85                          | Zhao et al., 2015                         |
| Hardibo                             | 1            | 2150.00       | 11.230000    | 39.760000     | -777777                    | 0               |                               | Moeyersons et al., 2006                   |
| Harlock Pond HF                     | 1            | 23.00         | 41.403000    | -70.713000    | lacustrine                 | 5.9             | 0.055                         | Foster et al., 2002b; Oswald et al., 2020 |
| Hasseldala Port                     | 2            | 63.00         | 56.266667    | 15.016667     | terrestrial, bog           | 0               | -999999                       | Wohlfarth et al., 2017                    |
| Hatchodaira                         | 1            | 810.00        | 35.230000    | 135.830000    | terrestrial, mire          | -888888         | 0.05                          | Sasaki and Takahara, Unpublished          |
| Hayk                                | 1            | 1920.00       | 11.350000    | 39.710000     | -777777                    | 0               |                               | Moeyersons et al., 2006                   |
| Head Lake                           | 1            | 2300.00       | 37.700000    | -105.500000   | lacustrine                 | -999999         | -999999                       | Jodry et al., 1989; Shafer, 1989          |
| Hells Kitchen Lake<br>(COHMAP2k)    | 1            | 500.00        | 46.183333    | -89.700000    | lacustrine                 | 19              | 0.045                         | Swain, 1973                               |
| Henty Bridge                        | 1            | 115.00        | -41.990000   | 145.470000    | lacustrine, drained lake   | -888888         | -999999                       | Colhoun, 1985                             |
| Herrenwieser See                    | 2            | 830.00        | 48.669167    | 8.296389      | lacustrine                 | 9.5             | 0.013                         | Rösch, 2012                               |
| Heshui County                       | 1            | 1400.00       | 36.030000    | 108.170000    | archaeological site        |                 | -999999                       | Tan et al., 2010                          |
| Hidden Lake Mount<br>Zirkel         | 1            | 2704.00       | 40.504000    | -106.607000   | lacustrine, glacial origin | 9               | 0.038                         | Shuman et al., 2006                       |
| High Lake                           | 1            | 192.00        | 44.516700    | -76.600000    | lacustrine                 | -999999         | 0.025                         | Fuller, 1997                              |
| Hinman Lake                         | 1            | 2501.00       | 40.771000    | -106.827000   | lacustrine                 | 5               | 0.027                         | Calder et al., 2015                       |
| Hino                                | 1            | 181.00        | 57.583056    | 27.238611     | terrestrial, fen           | -888888         | 0.02                          | Laul and Kihno, 1999                      |
| Hinojos Marsh                       | 2            | 1.50          | 36.960200    | -6.385800     | terrestrial, marsh         | -888888         | -999999                       | López-Sáez et al., 2018                   |
| Hogan's Billabong                   | 1            | 140.00        | -36.020000   | 146.710000    | lacustrine                 | 3.5             |                               | Reid et al., 2006                         |

| Site name                     | Entities (#) | Elevation (m) | Latitude (°) | Longitude (°) | Site Type                  | Water depth (m) | Basin size (km <sup>2</sup> ) | Citation(s)                                                                                           |
|-------------------------------|--------------|---------------|--------------|---------------|----------------------------|-----------------|-------------------------------|-------------------------------------------------------------------------------------------------------|
| Hogayaku                      | 1            | 3580.00       | -3.980000    | 137.380000    | lacustrine, glacial origin | 0               |                               | Hope, 2007a                                                                                           |
| Holbicky                      | 1            | 183.00        | 48.510000    | 17.109167     | terrestrial, bog           | -888888         | -999999                       | Jamrichová et al., 2019                                                                               |
| Holebudalen                   | 1            | 1144.00       | 59.841389    | 6.008611      | lacustrine                 | 8.2             | 0.02                          | Eide et al., 2005                                                                                     |
| Holtjarnen                    | 1            | 232.00        | 60.650000    | 14.916667     | lacustrine, glacial origin | 7               | 0.01                          | Brown and Giesecke, 2014; Giesecke, 2005a                                                             |
| Hoodoo Lake                   | 1            | 1770.00       | 46.320193    | -114.651545   | lacustrine                 | 4               | 0.046                         | Brunelle et al., 2005; Brunelle-Daines, 2002                                                          |
| Hopwoods Lagoon               | 1            | 38.00         | -33.210000   | 150.990000    | lacustrine                 | 0               |                               | Smeulders, 1999                                                                                       |
| Hornstaad                     | 1            | 393.00        | 47.690000    | 8.900000      | -777777                    |                 |                               | Rösch, 1992; Rösch, 1993                                                                              |
| Horse Cove Bog                | 1            | 887.00        | 35.040000    | -83.150000    | terrestrial, bog           | -888888         | 0.12                          | Delcourt and Delcourt, 1997a                                                                          |
| Horton Plains                 | 1            | 2200.00       | 6.800000     | 80.490000     | terrestrial, bog           | -888888         | -999999                       | Premathilake, 2006                                                                                    |
| Hougongzhai village           | 1            | -999999.00    | 35.680000    | 107.580000    | archaeological site        |                 | -999999                       | Zhou et al., 2011                                                                                     |
| Hovorany                      | 1            | 246.00        | 48.950000    | 17.057496     | terrestrial, fen           | -888888         | -999999                       | Jamrichová, Unpublished                                                                               |
| Howes Prairie Marsh           | 1            | 185.00        | 41.650000    | -87.072222    | terrestrial, marsh         | -888888         | 6e-04                         | Cole and Taylor, 1995                                                                                 |
| Howes Waterhole Swamp         | 1            | 280.00        | -33.010000   | 150.660000    | terrestrial, fen           | 0               |                               | Mason, 2004                                                                                           |
| Hoya del Castillo             | 2            | 258.00        | 41.482000    | -0.158300     | lacustrine, playa          | 4.5             | 0.17                          | Davis and Stevenson, 2007                                                                             |
| Huangqihai Lake               | 1            | 1280.00       | 40.830000    | 113.380000    | lacustrine, drained lake   | 0               | 80                            | Ling et al., 2016                                                                                     |
| Hudson Lake                   | 2            | 860.00        | 61.897711    | -145.670722   | lacustrine                 | 1.4             | 2.7                           | Barrett et al., 2013                                                                                  |
| Huguangyan Maar Lake          | 1            | 87.60         | 21.150000    | 110.280000    | lacustrine                 | 22              | 2.3                           | Chu, 2001                                                                                             |
| Hula                          | 1            | 70.00         | 33.040000    | 35.370000     | -777777                    | -777777         |                               | Turner et al., 2010                                                                                   |
| Hunnemara Lake Blekinge coast | 1            | 3.00          | 56.166700    | 14.883300     | lacustrine, drained lake   | -888888         | 0.2                           | Yu et al., 2005                                                                                       |
| Hunt Lake Rice County         | 1            | 327.00        | 44.331400    | -93.445400    | lacustrine                 | 8               | 0.71                          | <a href="https://www.ncdc.noaa.gov/paleo/study/21067">https://www.ncdc.noaa.gov/paleo/study/21067</a> |
| Hunter's Lake                 | 1            | 3516.00       | 37.600000    | -106.840000   | lacustrine                 | 0               |                               | Anderson et al., 2008a; Anderson, Unpublished                                                         |
| Hute pod Smrkem               | 1            | 533.00        | 49.470000    | 18.418517     | terrestrial, bog           | -888888         | -999999                       | Jamrichová, Unpublished                                                                               |
| Huzenbacher See               | 2            | 747.00        | 48.574657    | 8.348487      | lacustrine, glacial origin | 8               | 0.025                         | Rösch and Tserendorj, 2011a; Rösch and Tserendorj, 2011b                                              |
| Hyde Park                     | 1            | 74.00         | 41.780000    | -73.890000    | terrestrial, mire          | -888888         | -999999                       | Robinson et al., 2005                                                                                 |
| Icehouse Pond HF              | 1            | 19.00         | 41.798000    | -69.961000    | lacustrine                 | 6.3             | 0.018                         | Oswald et al., 2020; Parshall et al., 2003                                                            |
| Iezerul Sadovei               | 1            | 930.00        | 47.600000    | 25.449444     | lacustrine                 | 4.7             | 0.02                          | Florescu et al., 2017                                                                                 |
| Ijomba                        | 1            | 3630.00       | -4.030000    | 137.210000    | terrestrial, fen           | 0               |                               | Haberle and Ledru, 2001                                                                               |
| Imera                         | 1            | 1610.00       | 41.650000    | 44.210000     | terrestrial, bog           | 2               | 0.06                          | Connor and Sagona, 2007; Connor et al., 2004; Connor, Unpublished                                     |
| Ingar Swamp                   | 1            | 584.00        | -33.760000   | 150.450000    | terrestrial, mire          | -888888         | -999999                       | Chalson and Martin, 2009; Chalson, 1991                                                               |
| Isbentjorn                    | 1            | 787.00        | 59.765000    | 0.434440      | lacustrine                 | 11.5            | -999999                       | Birks, 2006                                                                                           |
| Iso Lehmälampi                | 1            | 106.00        | 60.350000    | 24.600000     | lacustrine                 | 8.1             | 0.028                         | Sarmaja-Korjonen, 1998                                                                                |
| Ispani                        | 1            | 2.00          | 41.860000    | 41.800000     | terrestrial, bog           | -888888         | -999999                       | Connor et al., 2007                                                                                   |

| Site name                     | Entities (#) | Elevation (m) | Latitude (°) | Longitude (°) | Site Type                  | Water depth (m) | Basin size (km <sup>2</sup> ) | Citation(s)                                                                                   |
|-------------------------------|--------------|---------------|--------------|---------------|----------------------------|-----------------|-------------------------------|-----------------------------------------------------------------------------------------------|
| Iztapa                        | 1            | 10.00         | 13.951908    | -90.659736    | terrestrial, marsh         |                 | -999999                       | Larmon, 2013                                                                                  |
| J'Arrive                      | 1            | 56.00         | 49.247200    | -65.376400    | lacustrine                 | 2.4             | 0.024                         | Carcaillet and Richard, 2000                                                                  |
| Jack Pine Lake                | 1            | 341.00        | 50.270556    | -86.962778    | lacustrine                 | 12.8            | 0.028                         | Ali, Unpublished                                                                              |
| Jackfish                      | 1            | 655.00        | 63.020000    | -136.470000   | lacustrine, glacial origin | 8               |                               | Edwards, Unpublished                                                                          |
| Jaczno                        | 1            | 164.00        | 54.276971    | 22.876204     | terrestrial, bog           | -888888         | 0.013                         | Marcisz et al., 2020                                                                          |
| Jagaike                       | 1            | 610.00        | 35.240000    | 135.450000    | terrestrial, mire          | -888888         | 0.002                         | Manabe and Takahara, Unpublished; Sasaki and Takahara, 2012; Sasaki and Takahara, Unpublished |
| Jagniecy Potok                | 1            | 850.00        | 50.850000    | 15.360000     | terrestrial, bog           |                 | 0.14                          | Kajukalo et al., 2016                                                                         |
| Jan Lake                      | 2            | 485.00        | 63.566670    | -143.900000   | lacustrine                 | 12              | 0.143                         | Barber and Finney, 2000; Carlson and Finney, 2004                                             |
| Jarveotsa                     | 1            | 42.20         | 59.095556    | 24.154167     | lacustrine                 | 2.65            | 0.17                          | Poska, 1994                                                                                   |
| Jason                         | 1            | 120.00        | 61.680000    | -107.780000   | lacustrine                 | 12.6            | 0.01                          | Lynch et al., 2004                                                                            |
| Jeleni louze                  | 1            | 460.00        | 50.892778    | 14.270000     | terrestrial, mire          | 1               | 0.02                          | Pokorný and Kuneš, 2005                                                                       |
| Jemima Pond HF                | 1            | 3.00          | 41.829000    | -69.985000    | lacustrine                 | 4.3             | 0.022                         | Oswald et al., 2020; Parshall et al., 2003                                                    |
| Jiandi Pond                   | 1            | -999999.00    | 45.000000    | 122.340000    | terrestrial, bog           |                 | 230                           | He et al., 2015                                                                               |
| Jianghan Plain                | 1            | 33.00         | 30.770000    | 113.080000    | archaeological site        |                 | -999999                       | Zhu et al., 2017                                                                              |
| Jiangxigou village            | 1            | 3312.00       | 36.590000    | 100.300000    | archaeological site        |                 | -999999                       | Jiang et al., 2015                                                                            |
| Jiangyangcun                  | 1            | 685.00        | 34.470000    | 107.880000    | archaeological site        |                 | -999999                       | Huang et al., 2006                                                                            |
| Jibbon Lagoon                 | 2            | 65.00         | -34.080000   | 151.150000    | terrestrial, bog           | 0               |                               | Chalson, 1991                                                                                 |
| Jicarita Bog                  | 1            | 3207.00       | 36.070000    | -105.580000   | -777777                    | 0               |                               | Anderson et al., 2008a; Anderson, Unpublished; Bair, 2004                                     |
| Jierstivaara                  | 1            | 457.00        | 68.660000    | 23.730000     | lacustrine, playa          | 2.5             | 0.112                         | Sarmaja-Korjonen, 1998                                                                        |
| Jinchuan (Changbai Mountains) | 1            | 614.00        | 42.300000    | 126.400000    | terrestrial, bog           |                 | 1.1                           | Gao et al., 2016                                                                              |
| Jinchuan peat bog             | 2            | 662.00        | 42.370000    | 126.430000    | terrestrial, bog           |                 | 3.14                          | Gao et al., 2016; Jiang et al., 2008                                                          |
| Jingjie                       | 1            | 1159.00       | 38.740000    | 110.180000    | terrestrial                |                 | 42200                         | Cai et al., 2015                                                                              |
| Jonah Lake                    | 1            | -999999.00    | 66.068000    | -145.084880   | lacustrine                 | 9.2             | -999999                       | Kelly et al., 2013                                                                            |
| Jones Lake                    | 1            | 409.00        | 49.446389    | -99.291111    | lacustrine                 | 4.4             | 0.56                          | Teed et al., 2009                                                                             |
| JPH4                          | 1            | 336.00        | 57.112222    | -111.423333   | terrestrial, bog           | -888888         | -999999                       | Magnan et al., 2018                                                                           |
| Juodonys                      | 1            | 20.00         | 55.740000    | 25.440000     | terrestrial, bog           | -888888         | -999999                       | Stancikaitė et al., 2004; Stancikaitė et al., 2009                                            |
| Kabata Swamp                  | 1            | 1370.00       | 0.480000     | 30.260000     | lacustrine, volcanic lake  | 0               |                               | Taylor et al., 1999                                                                           |
| Kahala                        | 2            | 33.20         | 59.486740    | 25.531503     | lacustrine                 | 1.2             | 3.45                          | Poska and Saarse, 1999                                                                        |
| Kaipō                         | 1            | 555.00        | -38.400000   | 177.100000    | terrestrial, bog           | 0               |                               | Hajdas et al., 2006; Newnham and Lowe, 2000                                                   |
| Kalksjon                      | 1            | 14.20         | 60.130000    | 13.050000     | lacustrine                 | 14.2            | 0.4                           | Lindbladh et al., 2000                                                                        |
| Kammekka hollow               | 3            | 156.00        | 61.242500    | 25.055278     | terrestrial, small hollow  | -888888         | 1e-06                         | Stivrins et al., 2017a; Stivrins et al., 2019                                                 |

| Site name                           | Entities (#) | Elevation (m) | Latitude (°) | Longitude (°) | Site Type                  | Water depth (m) | Basin size (km <sup>2</sup> ) | Citation(s)                                                                                           |
|-------------------------------------|--------------|---------------|--------------|---------------|----------------------------|-----------------|-------------------------------|-------------------------------------------------------------------------------------------------------|
| Kankaanjarvi                        | 3            | 85.00         | 61.539167    | 22.714722     | lacustrine, glacial origin | 10              | -999999                       | Kaakinen et al., 2010                                                                                 |
| Kapteinstjorn Siljan                | 1            | 590.00        | 59.330000    | 9.660000      | -777777                    |                 |                               | Molinari et al., 2005                                                                                 |
| Karakol                             | 1            | 2353.00       | 42.830000    | 77.390000     | lacustrine                 | 3               |                               | Beer and Tinner, 2008                                                                                 |
| Kashiru Swamp                       | 1            | 2240.00       | -3.460000    | 29.560000     | terrestrial, bog           | -888888         | -999999                       | Aucour et al., 1994                                                                                   |
| Katoomba Swamp                      | 1            | 950.00        | -33.710000   | 150.310000    | terrestrial, fen           | -888888         | -999999                       | Chalson, 1991                                                                                         |
| Kazanie fen                         | 1            | 101.00        | 52.458694    | 17.296352     | terrestrial, mire          | -888888         | 0.03                          | Czerwiński et al., 2019; Czerwiński et al., 2021                                                      |
| Keche Lake                          | 1            | 740.00        | 68.017444    | -146.923806   | lacustrine                 | 14.5            | 0.802                         | Chipman et al., 2015                                                                                  |
| Kelela Swamp                        | 1            | 1650.00       | -4.020000    | 138.910000    | terrestrial, bog           | 0               |                               | Haberle et al., 1991                                                                                  |
| Kelly Dudley Lake                   | 1            | 321.00        | 44.352300    | -93.370800    | lacustrine                 | 18              | 0.77                          | <a href="https://www.ncdc.noaa.gov/paleo/study/21069">https://www.ncdc.noaa.gov/paleo/study/21069</a> |
| Kendegelukol Lake<br>Ulagan Plateau | 1            | 2050.00       | 50.505600    | 87.641700     | lacustrine, glacial origin | 6               | -999999                       | Blyakharchuk et al., 2004                                                                             |
| Kentra Moss                         | 1            | 10.00         | 56.750000    | -5.830000     | terrestrial, bog           | -888888         | 0.95                          | Ellis and Tallis, 2000                                                                                |
| Kettle Lake, ND                     | 1            | 610.00        | 48.607198    | -103.623723   | lacustrine                 | 10.2            | 0.022                         | Brown et al., 2005b; Grimm et al., 2011; Grimm, 2011                                                  |
| Kettlehole Bog                      | 2            | 600.00        | -43.050000   | 171.780000    | terrestrial, bog           | 0               |                               | McGlone et al., 2004                                                                                  |
| Kevojarvi                           | 1            | 74.70         | 69.758940    | 27.000180     | lacustrine                 | 35              | 1.02                          | Lisitsyna, Unpublished                                                                                |
| Keyhole (Yukon)                     | 1            | 826.00        | 61.078000    | -138.375000   | lacustrine                 | 4               | 0.0406                        | Gajewski et al., 2014                                                                                 |
| Kholboo Nuur                        | 1            | 2570.00       | 49.701400    | 91.091400     | lacustrine                 | 2.9             | 0.09                          | Umbanhowar Jr et al., 2009                                                                            |
| Khundt Nuur                         | 1            | 1933.00       | 49.051300    | 97.160000     | lacustrine                 | 6.8             | 26.78                         | Umbanhowar Jr et al., 2009                                                                            |
| Kichikol                            | 1            | 2541.00       | 39.980000    | 73.550000     | lacustrine                 | 10              |                               | Beer, Unpublished                                                                                     |
| Kiilaspere                          | 1            | 22.60         | 58.796944    | 24.436111     | terrestrial, bog           | -888888         | 0.43                          | Veski, 1998                                                                                           |
| Kilden Islet of Melkoya             | 1            | 15.00         | 70.670000    | 23.640000     | terrestrial, fen           |                 | 0.00015                       | Jensen, 2004                                                                                          |
| Killalea Lagoon                     | 1            | 22.00         | -34.600000   | 150.860000    | coastal, estuarine         | 1               | 0.23                          | Dodson et al., 1993                                                                                   |
| Killymaddy Lough                    | 1            | 70.00         | 54.530000    | -6.760000     | lacustrine                 | 10.5            | 0.025                         | Hirons and Edwards, 1986                                                                              |
| Kimble Pond                         | 1            | 314.00        | 44.219020    | -93.840090    | lacustrine, glacial origin | 16              | 0.049                         | Camill et al., 2003; Geiss et al., 2003; Umbanhowar Jr et al., 2006                                   |
| Kings Tableland Swamp               | 1            | 780.00        | -33.730000   | 150.480000    | terrestrial, mire          | -888888         | -999999                       | Chalson and Martin, 2009; Chalson, 1991                                                               |
| Kings Waterhole                     | 1            | 280.00        | -33.010000   | 150.660000    | terrestrial, bog           | 0.1             | -999999                       | Black, 2001; Chalson, 1991                                                                            |
| Kinloch                             | 1            | -999999.00    | 57.025431    | -6.299902     | terrestrial, mire          | -888888         | -999999                       | Hirons and Edwards, 1990                                                                              |
| Kinnshaugen                         | 1            | 591.00        | 61.108330    | 10.359160     | lacustrine                 | 4.6             | -999999                       | Birks et al., 2012                                                                                    |
| Kis-Mohos Ro                        | 1            | 310.00        | 48.400000    | 20.400000     | terrestrial, bog           |                 | 0.0036                        | Willis et al., 1997                                                                                   |
| Klotjarnen                          | 1            | 235.00        | 61.816667    | 16.533333     | lacustrine, glacial origin | 6               | 0.012                         | Brown and Giesecke, 2014; Giesecke, 2005a                                                             |
| Klukvennoye                         | 1            | 171.00        | 54.780000    | 43.450000     | terrestrial, bog           |                 | 0.15                          | Feurdean et al., 2020b; Novenko et al., 2018                                                          |
| Knob Hill Pond HF                   | 1            | 370.00        | 44.360500    | -72.373700    | lacustrine                 | 4.2             | 0.071                         | Oswald et al., 2018; Oswald, Unpublished                                                              |
| Kohuora                             | 1            | 30.00         | -36.978700   | 174.842700    | lacustrine, volcanic lake  | 0               | -999999                       | Newnham et al., 2007a                                                                                 |
| Koivasoo                            | 1            | 27.50         | 58.908611    | 22.199444     | terrestrial, bog           | -888888         | 0.34                          | Königsson et al., 1998                                                                                |
| Kontolanrahka bog<br>Poytya         | 1            | 80.00         | 60.790000    | 22.770000     | terrestrial, bog           | -888888         | 8.8                           | Sillasoo et al., 2011; Väiliranta et al., 2007                                                        |

| Site name                       | Entities (#) | Elevation (m) | Latitude (°) | Longitude (°) | Site Type                   | Water depth (m) | Basin size (km <sup>2</sup> ) | Citation(s)                                                                                                               |
|---------------------------------|--------------|---------------|--------------|---------------|-----------------------------|-----------------|-------------------------------|---------------------------------------------------------------------------------------------------------------------------|
| Kosipe Swamp                    | 2            | 1960.00       | -8.460000    | 147.200000    | terrestrial, marsh          | -888888         | 12                            | Hope, 2009                                                                                                                |
| Koumac                          | 1            | 2.00          | -20.650000   | 164.280000    | coastal, salt marsh         | -999999         | -888888                       | Hope et al., 1999                                                                                                         |
| Kozcaroniacute                  | 1            | 460.00        | 49.376389    | 14.025833     | terrestrial, mire           | -888888         | 0.001                         | Pokorný and Kuneš, 2009                                                                                                   |
| Kragso                          | 1            | 47.00         | 56.291465    | 9.091028      | lacustrine                  | 1               | 0.22                          | Odgaard, 1994                                                                                                             |
| Krepelcí dul                    | 1            | 357.00        | 50.931874    | 14.438233     | terrestrial, bog            | -888888         | 6e-04                         | Bobek et al., 2019                                                                                                        |
| Krimda                          | 1            | 200.00        | 35.280000    | 6.630000      | terrestrial, bog            | -777777         |                               | Damblon, 1991                                                                                                             |
| Krugloe Bog West Siberian Plain | 1            | 100.00        | 56.895600    | 84.576100     | terrestrial, bog            | -888888         | -999999                       | Blyakharchuk et al., 2019a                                                                                                |
| Kukka Hollow                    | 1            | 136.00        | 61.649300    | 32.752900     | terrestrial, small hollow   | -888888         | 0.001                         | Kuosmanen et al., 2015                                                                                                    |
| Kumata                          | 1            | 1770.00       | 42.590400    | 23.251900     | terrestrial, bog            |                 | 0.001                         | Feurdean et al., 2020b; Tonkov and Possnert, 2016a; Tonkov and Possnert, 2016b                                            |
| Kumisi                          | 1            | 469.00        | 41.580000    | 44.830000     | lacustrine, tectonic origin | 3               | 5                             | Connor, 2006                                                                                                              |
| Kunming Lake                    | 2            | 48.60         | 39.980000    | 116.260000    | lacustrine                  | -777777         |                               | Huang et al., 1994; Huang, 1996                                                                                           |
| Kurnell Fen                     | 1            | 15.00         | -34.010000   | 151.100000    | coastal, estuarine          | 0               |                               | Martin, 1994                                                                                                              |
| Kurnell Swamp                   | 1            | 2.00          | -34.030000   | 151.210000    | terrestrial, fen            | 0               |                               | Martin, 1994                                                                                                              |
| Kuttura                         | 1            | 277.00        | 68.406140    | 26.503390     | terrestrial, bog            | 0               | 0.18                          | Lisitsyna, Unpublished                                                                                                    |
| Kwasebuge                       | 1            | 1939.00       | -4.292015    | 37.922840     | -777777                     |                 |                               | Finch et al., 2016                                                                                                        |
| La Laguna                       | 1            | 560.00        | 28.492222    | -16.318333    | -777777                     |                 |                               | de Nascimento et al., 2009                                                                                                |
| La Loge a Magnard Chavannes     | 1            | 150.00        | 46.840000    | 2.360000      | terrestrial, mire           | -888888         | -999999                       | Vannière and Martineau, 2005; Vannière, 2001                                                                              |
| La Yeguada                      | 1            | 650.00        | 8.450000     | -80.850000    | lacustrine                  | 0               |                               | Haberle and Ledru, 2001                                                                                                   |
| La-Teta                         | 1            | 1020.00       | 3.080000     | -76.530000    | lacustrine                  | -999999         | -999999                       | Berrío et al., 2002                                                                                                       |
| Labelle Lake                    | 1            | 375.00        | 48.180242    | -79.457011    | lacustrine                  | 9.6             | 0.105                         | Paillard, Unpublished                                                                                                     |
| Lac a Euloge                    | 1            | 83.00         | 49.244400    | -65.372200    | lacustrine                  | 2.2             | 0.012                         | Carcaillet and Richard, 2000; Carcaillet et al., 2002; Marcoux and Richard, 1995                                          |
| Lac a Jean-Marie Boulay         | 1            | 276.00        | 48.969800    | -64.486100    | -777777                     |                 |                               | Richard, Unpublished                                                                                                      |
| Lac a l'ange                    | 1            | 648.00        | 47.460000    | -70.400000    | lacustrine                  |                 |                               | Richard, Unpublished                                                                                                      |
| Lac a la Main                   | 1            | 730.00        | 47.700000    | -70.622200    | lacustrine                  | -999999         | 0.096                         | Bussieres, 1992; Carcaillet and Richard, 2000; Carcaillet et al., 2002                                                    |
| Lac a la Montagne Ronde         | 1            | 150.00        | 48.320800    | -68.565300    | lacustrine                  | -999999         | 0.035                         | Carcaillet and Richard, 2000; Carcaillet et al., 2002; Richard and Larouche, 1994                                         |
| Lac a la Pessiere               | 1            | 280.00        | 49.508300    | -79.240300    | lacustrine                  | 16              | 0.036                         | Carcaillet and Richard, 2000; Carcaillet et al., 2001; Carcaillet et al., 2002; Carcaillet et al., 2006; Carcaillet, 1998 |
| Lac a la Tortue                 | 3            | 125.00        | 46.542883    | -72.615028    | terrestrial, bog            | -888888         | 66                            | Pilote et al., 2018                                                                                                       |
| Lac a Leonard                   | 1            | 17.00         | 49.207800    | -65.812800    | lacustrine                  | 0.6             | 0.002                         | Carcaillet and Richard, 2000; Carcaillet et al., 2002; Flannigan et al., 2001; Labelle and Richard, 1984                  |
| Lac aux Atocas                  | 1            | 114.00        | 45.542800    | -73.310800    | lacustrine                  | 1               | 0.012                         | Carcaillet and Richard, 2000; Carcaillet et al., 2002; Flannigan et al., 2001; Gauthier, 1981                             |

| Site name            | Entities (#) | Elevation (m) | Latitude (°) | Longitude (°) | Site Type                  | Water depth (m) | Basin size (km <sup>2</sup> ) | Citation(s)                                                                                                                                        |
|----------------------|--------------|---------------|--------------|---------------|----------------------------|-----------------|-------------------------------|----------------------------------------------------------------------------------------------------------------------------------------------------|
| Lac Bride            | 1            | 437.00        | 47.313600    | -74.504600    | -777777                    |                 |                               | Richard, Unpublished                                                                                                                               |
| Lac Caribou          | 1            | 116.00        | 48.197800    | -64.940000    | lacustrine                 | 2.3             | 0.026                         | Carcaillet and Richard, 2000; Carcaillet et al., 2002; Flannigan et al., 2001; Jetté and Richard, 1992                                             |
| Lac Christelle       | 1            | 291.00        | 49.732140    | -84.254530    | lacustrine                 | 7               | 0.024                         | Genries et al., 2012                                                                                                                               |
| Lac Clo              | 1            | 280.00        | 48.496900    | -79.352800    | lacustrine                 | 3               | 0.007                         | Carcaillet and Richard, 2000; Carcaillet et al., 2002; Richard, 1980                                                                               |
| Lac Daumont          | 1            | 607.00        | 54.882800    | -69.402800    | lacustrine                 | 3               | 0.015                         | Carcaillet and Richard, 2000; Carcaillet et al., 2002; Richard et al., 1982                                                                        |
| Lac Delorme          | 1            | 538.00        | 54.423900    | -69.929700    | lacustrine                 | 4.5             | 0.011                         | Carcaillet and Richard, 2000; Carcaillet et al., 2002; Richard et al., 1982                                                                        |
| Lac des Ilets        | 1            | 120.00        | 48.190000    | -71.240000    | terrestrial, mire          | 0               |                               | Simard et al., 2006                                                                                                                                |
| Lac Diana            | 1            | 114.00        | 60.980000    | -69.950000    | lacustrine                 | -777777         |                               | Blarquez et al., 2015; Richard, Unpublished                                                                                                        |
| Lac du Berger        | 1            | 479.00        | 49.418510    | -90.475870    | lacustrine                 | 4               | 0.004                         | Senici et al., 2015                                                                                                                                |
| Lac du Lait          | 1            | 2180.00       | 45.310000    | 6.810000      | lacustrine                 | 1               |                               | Carcaillet et al., 2009; Genries et al., 2009b                                                                                                     |
| Lac du Loup          | 1            | 2032.00       | 45.180000    | 6.530000      | lacustrine                 | 1.4             |                               | Carcaillet et al., 2009                                                                                                                            |
| Lac du Loup, Quebec  | 1            | 206.00        | 53.055030    | -77.400530    | lacustrine                 | 3               | 0.016                         | Oris et al., 2014                                                                                                                                  |
| Lac du Thyl          | 1            | 2038.00       | 45.240000    | 6.490000      | terrestrial, bog           | 0.5             |                               | Carcaillet et al., 2009; Genries et al., 2009a                                                                                                     |
| Lac du Triangle      | 1            | 465.00        | 48.710000    | -65.413900    | lacustrine                 | 1.6             | 0.015                         | Asnong and Richard, 2003; Asnong, 2000; Carcaillet et al., 2002; Carcaillet et al., 2006                                                           |
| Lac du Verney-Dessus | 1            | 2276.00       | 45.693333    | 6.872500      | lacustrine                 | 1               | -999999                       | Millet et al., 2008a; Miras et al., 2006a                                                                                                          |
| Lac Flevy            | 1            | 381.00        | 48.216900    | -71.218900    | lacustrine                 | 4.5             | 0.015                         | Carcaillet and Richard, 2000                                                                                                                       |
| Lac Francis          | 1            | 305.00        | 48.526400    | -79.472200    | lacustrine, glacial origin | 6               | 0.008                         | Carcaillet and Richard, 2000; Carcaillet et al., 2001; Carcaillet et al., 2002; Carcaillet et al., 2006; Carcaillet et al., 2007; Carcaillet, 1998 |
| Lac Garot            | 1            | 248.00        | 51.099640    | -77.553580    | lacustrine                 | 6.9             | 0.051                         | Oris et al., 2014                                                                                                                                  |
| Lac Geai SBL         | 1            | 360.00        | 45.995878    | -73.993222    | lacustrine                 | 8.2             | -999999                       | Richard, Unpublished                                                                                                                               |
| Lac Hertel           | 1            | 75.00         | 45.680000    | -74.050000    | -777777                    | 0               |                               | Richard, Unpublished                                                                                                                               |
| Lac Huard            | 1            | 343.00        | 50.164140    | -86.826500    | lacustrine                 | 8.3             | 0.037                         | Genries et al., 2012                                                                                                                               |
| Lac Le Caron         | 2            | 248.00        | 52.292611    | -75.830500    | terrestrial, bog           | -888888         | 2.24                          | van Bellen et al., 2012                                                                                                                            |
| Lac Marcotte         | 1            | 503.00        | 47.070000    | -71.420000    | lacustrine                 | -777777         |                               | Blarquez et al., 2015; Richard, Unpublished                                                                                                        |
| Lac Marie-Eve        | 1            | 296.00        | 52.061690    | -75.516670    | lacustrine                 | 8.7             | 0.165                         | Oris et al., 2014                                                                                                                                  |
| Lac Martini          | 1            | 242.00        | 47.475000    | -72.764700    | lacustrine                 | -999999         | 0.002                         | Carcaillet and Richard, 2000; Carcaillet et al., 2002                                                                                              |
| Lac Miroir           | 1            | 2214.00       | 44.630000    | 6.790000      | lacustrine                 | -777777         |                               | Carcaillet and Blarquez, 2017                                                                                                                      |
| Lac Nano             | 1            | 206.00        | 53.023750    | -77.364250    | lacustrine                 | 3.2             | 0.004                         | Oris et al., 2014                                                                                                                                  |
| Lac Nans             | 1            | 431.00        | 50.368639    | -74.305917    | lacustrine                 | 5               | 0.045                         | Ali et al., 2012; El-Guellab et al., 2015                                                                                                          |
| Lac Ouellet          | 1            | 300.00        | 47.532800    | -68.943900    | lacustrine                 | 1.9             | 0.006                         | Carcaillet and Richard, 2000; Carcaillet et al., 2002; Flannigan et al., 2001; Richard et al., 1992                                                |
| Lac Perdu            | 1            | 152.00        | 49.170800    | -66.323600    | lacustrine                 | 7               | 0.005                         | Carcaillet and Richard, 2000; Carcaillet et al., 2002; Flannigan et al., 2001                                                                      |
| Lac Rond             | 1            | 360.00        | 46.000000    | -74.000000    | lacustrine                 | -777777         |                               | Clark et al., 2001                                                                                                                                 |
| Lac Schon            | 1            | 291.00        | 50.594920    | -77.568360    | lacustrine                 | 7               | 0.028                         | Oris et al., 2014                                                                                                                                  |
| Lac St Gabriel       | 1            | 250.00        | 46.275800    | -73.475800    | lacustrine                 | 1               | 0.003                         | Carcaillet and Richard, 2000; Carcaillet et al., 2002; Flannigan et al., 2001; Richard, 1977                                                       |

| Site name              | Entities (#) | Elevation (m) | Latitude (°) | Longitude (°) | Site Type                      | Water depth (m) | Basin size (km <sup>2</sup> ) | Citation(s)                                                                     |
|------------------------|--------------|---------------|--------------|---------------|--------------------------------|-----------------|-------------------------------|---------------------------------------------------------------------------------|
| Lac Superieur de Fully | 1            | 2135.00       | 46.176667    | 7.093611      | lacustrine, glacial origin     | 2               | 0.25                          | Finsinger and Tinner, 2007                                                      |
| Lac Suprin             | 2            | 230.00        | -22.300000   | 166.983300    | lacustrine                     | 1               | 0.01                          | Hope and Pask, 1998                                                             |
| Lac Trefle             | 1            | 270.00        | 51.850140    | -76.045140    | lacustrine                     | 5.4             | 0.068                         | Oris et al., 2014                                                               |
| Lagaccione             | 1            | 355.00        | 42.566700    | 11.850000     | lacustrine, drained lake       | -888888         | 0.6                           | Magri, 1999; Magri, 2004                                                        |
| Laghi dell'Orgials     | 1            | 2240.00       | 44.230000    | 7.130000      | terrestrial, bog               | -888888         | -999999                       | Ortu et al., 2005                                                               |
| Lago Alimini Piccolo   | 1            | 1.00          | 40.180000    | 18.430000     | lacustrine                     | 2               | 1.05                          | di Rita and Magri, 2009                                                         |
| Lago Battaglia         | 1            | 1.00          | 41.905278    | 16.134167     | lacustrine, drained lake       | -888888         | -999999                       | Caroli and Caldara, 2006                                                        |
| Lago Catemaco          | 1            | 340.00        | 18.666667    | -95.000000    | lacustrine, volcanic lake      | 22.5            | 75                            | Byrne and Horn, 1989                                                            |
| Lago Chirripo          | 1            | 3520.00       | 9.483000     | -83.496000    | lacustrine                     | 9               | 0.05                          | Horn, 1989; Horn, 1993                                                          |
| Lago Condorito         | 1            | 60.00         | -41.750000   | -73.110000    | lacustrine, thermokarst origin | 2.7             | -999999                       | Moreno and León, 2003; Moreno et al., 1999                                      |
| Lago Crispim           | 1            | 2.00          | -0.620000    | -47.640000    | lacustrine                     | 1               | 0.03                          | Behling and da Costa, 2001                                                      |
| Lago de las Morrenas   | 1            | 3480.00       | 9.480000     | -83.480000    | lacustrine                     | 8.3             | -777777                       | Horn, 1993                                                                      |
| Lago del Greppo        | 1            | 1442.00       | 44.110000    | 11.660000     | lacustrine                     | 1               | 1.8e-05                       | Chiarugi, 1936; Vescovi et al., 2010                                            |
| Lago Dell'Accesa       | 1            | 155.00        | 42.987933    | 10.895122     | lacustrine                     | 37.5            | 0.226                         | Vannière et al., 2008                                                           |
| Lago della Costa       | 2            | 7.00          | 45.270278    | 11.743056     | lacustrine                     | 5               | 0.03                          | Kaltenrieder et al., 2004; Kaltenrieder et al., 2009; Kaltenrieder et al., 2010 |
| Lago delle Fate        | 1            | 2130.00       | 44.266667    | 7.100000      | lacustrine                     | 3               | -999999                       | Ortu et al., 2005; Ortu et al., 2006; Ortu et al., 2008                         |
| Lago di Basso          | 1            | 2250.00       | 46.416700    | 9.283300      | lacustrine                     | 0.8             | 7e-04                         | Carcaillet et al., 2002; Wick, 1994                                             |
| Lago di Fimon          | 1            | 23.00         | 45.466700    | 11.533300     | lacustrine                     | 3.9             | 0.67                          | Valsecchi et al., 2008                                                          |
| Lago di Massaciuccoli  | 1            | 1.00          | 43.850000    | 10.310000     | coastal                        | 3               | 7                             | Colombaroli et al., 2007                                                        |
| Lago di Muzzano        | 1            | 337.00        | 45.994444    | 8.927778      | lacustrine, glacial origin     | 3               | 0.22                          | Tinner et al., 2005                                                             |
| Lago di Origlio        | 1            | 416.00        | 46.055556    | 8.944444      | lacustrine, glacial origin     | 5               | 0.08                          | Tinner et al., 1999; Tinner et al., 2005                                        |
| Lago di Pergusa        | 1            | 674.00        | 37.510000    | 14.300000     | lacustrine                     | 1               | 1.4                           | Sadori et al., 2008                                                             |
| Lago do Pires          | 1            | 390.00        | -17.950000   | -42.210000    | lacustrine                     | 5               | 0.025                         | Behling, 1995                                                                   |
| Lago Guanaco           | 1            | 60.00         | -51.130000   | -73.100000    | lacustrine, glacial origin     | 16              | 0.13                          | François, Unpublished                                                           |
| Lago Huala Hue         | 1            | 849.00        | -41.510752   | -71.507515    | lacustrine, glacial origin     | -999999         | -999999                       | Iglesias et al., 2012                                                           |
| Lago Lepue             | 1            | 152.00        | -42.804780   | -73.712150    | lacustrine, thermokarst origin | 10              | -999999                       | Pesce and Moreno, 2014                                                          |
| Lago los Ninos         | 1            | 1015.00       | -44.007105   | -71.494142    | lacustrine, glacial origin     | -999999         | 0.8                           | Iglesias et al., 2016                                                           |
| Lago Lucone            | 1            | 249.00        | 45.550000    | 10.483300     | lacustrine, drained lake       | -888888         | -999999                       | Valsecchi et al., 2005                                                          |



| Site name                 | Entities (#) | Elevation (m) | Latitude (°) | Longitude (°) | Site Type                      | Water depth (m) | Basin size (km <sup>2</sup> ) | Citation(s)                                                             |
|---------------------------|--------------|---------------|--------------|---------------|--------------------------------|-----------------|-------------------------------|-------------------------------------------------------------------------|
| Lago Mosquito             | 1            | 556.00        | -42.493858   | -71.404047    | lacustrine, thermokarst origin | 8               | 4.61                          | Whitlock et al., 2006                                                   |
| Lago Perso                | 1            | 1801.00       | 44.905833    | 6.797222      | lacustrine                     | 3               | 0.000408                      | Blarquez et al., 2010                                                   |
| Lago Piccolo di Avigliana | 1            | 356.00        | 45.050000    | 7.383300      | lacustrine, glacial origin     | 12.5            | 0.6                           | Finsinger and Tinner, 2006; Valsecchi et al., 2008                      |
| Lago Pichilafquen         | 1            | 301.00        | -39.220472   | -72.208021    | lacustrine                     | 19              | -999999                       | Jara and Moreno, 2014                                                   |
| Lago Pollux               | 1            | 640.00        | -45.670000   | -71.860000    | terrestrial, bog               | -888888         | -999999                       | Markgraf et al., 2007                                                   |
| Lago Rogaguado            | 2            | 125.00        | -4.374611    | -79.111528    | lacustrine                     | 4               | 315                           | Brugger et al., 2016                                                    |
| Lago Tapajos              | 1            | 15.00         | -2.770000    | -55.080000    | fluvial                        | 0               | 2250                          | Bush et al., 2007a                                                      |
| Lago Theobald             | 1            | 678.00        | -43.437932   | -71.561818    | -777777                        |                 |                               | Iglesias et al., 2014                                                   |
| Lago Trifoglietti         | 1            | 1056.00       | 39.548880    | 16.022220     | lacustrine                     | 1.5             | 0.00973                       | de Beaulieu et al., 2017                                                |
| Lago Verde                | 1            | 149.00        | 18.610000    | -95.340000    | lacustrine, volcanic lake      | 4               | -999999                       | Caballero et al., 2006; Lozano-García et al., 2007; Ortega et al., 2006 |
| Lagoa da Curuca           | 1            | 35.00         | -0.760000    | -47.850000    | lacustrine                     | 2               | 0.15                          | Behling, 2001                                                           |
| Lagoa do Caco             | 1            | 120.00        | -2.970219    | -43.267808    | lacustrine                     | 12              | 1.5                           | Ledru et al., 2001; Ledru et al., 2002; Ledru et al., 2006              |
| Lagoa Nova                | 1            | 390.00        | -17.950000   | -42.200000    | lacustrine                     | 6               | 0.02                          | Behling, 2003                                                           |
| Laguna Aculeo             | 1            | 350.00        | -33.833300   | -70.910000    | lacustrine, thermokarst origin | 6               | 12                            | Villa-Martínez et al., 2003; Villa-Martínez et al., 2004                |
| Laguna Azul               | 2            | 100.00        | -52.120000   | -69.520000    | lacustrine, volcanic lake      | 56              | -999999                       | Mayr et al., 2005                                                       |
| Laguna Bella Vista        | 1            | 191.00        | -13.616700   | -61.550000    | lacustrine, tectonic origin    | 2               | 29                            | Burbridge et al., 2004; Mayle et al., 2000                              |
| Laguna Bonillita          | 1            | 450.00        | 9.990000     | -83.610000    | lacustrine                     | 20              |                               | Northrop and Horn, 1996                                                 |
| Laguna Chaplin            | 1            | 200.00        | -14.466667   | -61.066667    | lacustrine, tectonic origin    | 2               | 17                            | Burbridge et al., 2004; Mayle et al., 2000                              |
| Laguna Charco Verde       | 1            | 33.00         | 11.470000    | -85.630000    | lacustrine, volcanic lake      | -999999         | -999999                       | Avnery et al., 2011                                                     |
| Laguna Chorreras          | 2            | 3700.00       | -2.750000    | -79.160000    | lacustrine, glacial origin     | 14              | 0.17                          | Hansen et al., 2003                                                     |
| Laguna Cocha Caranga      | 3            | 2710.00       | -4.045861    | -79.159583    | lacustrine                     | 2               | 2                             | Niemann and Behling, 2009b                                              |
| Laguna Cuzcachapa         | 1            | 709.00        | 13.980000    | -89.680000    | lacustrine                     | 7               |                               | Dull, 2001                                                              |
| Laguna de Chochos         | 1            | 3285.00       | -7.630000    | -77.470000    | lacustrine, glacial origin     | 10              | -999999                       | Bush et al., 2005                                                       |
| Laguna de la Mosca        | 1            | 2889.00       | 37.059700    | -3.314700     | lacustrine, glacial origin     | 3.4             | 0.0048                        | Manzano et al., 2019                                                    |
| Laguna de la Mula         | 1            | 2497.00       | 37.059700    | -3.416800     | lacustrine, glacial origin     | 0.57            | 0.002                         | Jiménez-Moreno et al., 2013                                             |
| Laguna de Rio Seco        | 1            | 3020.00       | 37.052057    | -3.345810     | lacustrine                     | 3               | 0.0042                        | Anderson et al., 2011                                                   |
| Laguna de Salvador        | 1            | 990.00        | 18.795786    | -70.886979    | lacustrine                     | 2.8             | -999999                       | Lane et al., 2009                                                       |
| Laguna de Tagua Tagua     | 1            | 200.00        | -34.500000   | -71.160000    | lacustrine, drained lake       | -888888         | 50                            | Heusser, 1990a                                                          |

| Site name                | Entities (#) | Elevation (m) | Latitude (°) | Longitude (°) | Site Type                      | Water depth (m) | Basin size (km <sup>2</sup> ) | Citation(s)                                                            |
|--------------------------|--------------|---------------|--------------|---------------|--------------------------------|-----------------|-------------------------------|------------------------------------------------------------------------|
| Laguna de Valleseco      | 2            | 870.00        | 28.064461    | -15.563570    | -777777                        |                 |                               | de Nascimento et al., 2016                                             |
| Laguna del Condor        | 1            | 818.00        | -42.350679   | -71.288481    | lacustrine                     | 8.5             | 1.75                          | Iglesias et al., 2011                                                  |
| Laguna EkNaab            | 1            | 160.00        | 17.421145    | -89.236475    | lacustrine                     | 2.1             | 0.0017                        | Wahl et al., 2019                                                      |
| Laguna Grande            | 2            | 1250.00       | 28.116667    | -17.250000    | -777777                        |                 |                               | Nogué et al., 2013                                                     |
| Laguna Guallar           | 2            | 336.00        | 41.408300    | -0.227800     | lacustrine, playa              | 0.3             | 0.092                         | Davis and Stevenson, 2007; Davis, Unpublished                          |
| Laguna Herradura         | 1            | -777777.00    | 22.010000    | -98.150000    | lacustrine, fluvial origin     | -777777         |                               | Dull et al., 2010                                                      |
| Laguna la Pava           | 1            | 731.00        | -44.279673   | -71.523314    | lacustrine, glacial origin     | -999999         | -999999                       | Iglesias et al., 2016                                                  |
| Laguna la Zeta           | 1            | 774.00        | -42.890163   | -71.349370    | lacustrine                     | -999999         | -999999                       | Iglesias et al., 2014                                                  |
| Laguna Las Margaritas    | 1            | 290.00        | 3.380000     | -73.430000    | lacustrine, fluvial origin     | 1.5             | 0.44                          | Wille et al., 2003                                                     |
| Laguna Lincoln           | 1            | 19.00         | -45.360000   | -74.060000    | lacustrine                     | 0               |                               | Villa-Martínez et al., 2012                                            |
| Laguna Llana del Espino  | 1            | 700.00        | 13.950000    | -89.520000    | lacustrine, tectonic origin    | 4.6             | 1                             | Dull, 2004a                                                            |
| Laguna Lofel             | 1            | 13.00         | -44.920000   | -74.320000    | lacustrine                     | 0               |                               | Villa-Martínez et al., 2012                                            |
| Laguna Melli             | 1            | 70.00         | -42.760000   | -73.550000    | lacustrine, glacial origin     | -777777         |                               | Abarzúa and Moreno, 2008; Alloway et al., 2017; Pesce and Moreno, 2014 |
| Laguna Metapan           | 1            | 450.00        | 14.300000    | -89.470000    | lacustrine, volcanic lake      | -999999         | -999999                       | Dull et al., 2010                                                      |
| Laguna Oprasa            | 1            | 50.00         | -44.355556   | -73.655556    | lacustrine, thermokarst origin | 3.66            |                               | Haberle and Bennett, 2004                                              |
| Laguna Padre Laguna      | 1            | 1280.00       | -41.359762   | -71.508487    | lacustrine, glacial origin     | -999999         | -999999                       | Iglesias et al., 2012                                                  |
| Laguna Pallcacocha       | 1            | 4060.00       | -2.750000    | -79.160000    | lacustrine, glacial origin     | 8               | 0.06                          | Hansen et al., 2003                                                    |
| Laguna Pompal            | 1            | 700.00        | 18.370000    | -94.950000    | lacustrine                     | 0               | -999999                       | Goman and Byrne, 1998                                                  |
| Laguna Rabadilla de Vaca | 1            | 1990.00       | -3.980917    | -79.074472    | lacustrine                     | 5               | 0.06                          | Niemann et al., 2009                                                   |
| Laguna Santa Elena       | 1            | 1100.00       | 8.560000     | -82.560000    | lacustrine                     | 4               |                               | Anchukaitis and Horn, 2005                                             |
| Laguna Six Minutes       | 1            | 15.00         | -46.410000   | -74.330000    | lacustrine                     | 0               |                               | Villa-Martínez et al., 2012                                            |
| Laguna Stibnite          | 1            | 15.00         | -46.410000   | -74.400000    | lacustrine                     | 0               |                               | Villa-Martínez et al., 2012                                            |
| Laguna Venus             | 1            | 600.00        | -45.530000   | -72.010000    | lacustrine, tectonic origin    | 5.5             | 0.004                         | Szeicz et al., 1998                                                    |
| Laguna Verde             | 1            | 1600.00       | 13.890000    | -89.780000    | lacustrine                     | 4.15            |                               | Dull, 2001; Dull, 2004b                                                |
| Laguna Volcan            | 1            | 1500.00       | 8.750000     | -82.680000    | lacustrine, volcanic lake      | 12              | 0.01                          | Behling, 2000                                                          |
| Laguna Zoncho            | 2            | 1190.00       | 8.813000     | -82.963000    | lacustrine, tectonic origin    | 2.3             | 0.0075                        | Clement and Horn, 2001                                                 |
| Laguna Zurita            | 1            | 3155.00       | -4.002444    | -79.059583    | lacustrine                     | 3               | 2                             | Niemann and Behling, 2009a                                             |
| Lagunas Natasas Bosque   | 1            | 3495.00       | -4.730417    | -79.424064    | terrestrial, bog               |                 | -999999                       | Rodríguez and Behling, 2012                                            |

| Site name                      | Entities (#) | Elevation (m) | Latitude (°) | Longitude (°) | Site Type                        | Water depth (m) | Basin size (km <sup>2</sup> ) | Citation(s)                                                                                                                                                      |
|--------------------------------|--------------|---------------|--------------|---------------|----------------------------------|-----------------|-------------------------------|------------------------------------------------------------------------------------------------------------------------------------------------------------------|
| Lake Acarabixi                 | 2            | 33.00         | -0.345833    | -64.498889    | lacustrine, fluvial origin       | -999999         | 0.4                           | Rodríguez-Zorro et al., 2017b                                                                                                                                    |
| Lake Aljojuca                  | 1            | 2376.00       | 19.091130    | -97.533602    | lacustrine, volcanic lake        | 30              | 0.78                          | Bhattacharya and Byrne, 2016                                                                                                                                     |
| Lake Banyoles                  | 1            | 174.00        | 42.129100    | 2.751800      | lacustrine                       | 46              | 1.2                           | Revelles et al., 2015                                                                                                                                            |
| Lake Baraba Thirlmere Lakes    | 1            | 305.00        | -34.230000   | 150.530000    | lacustrine                       | 6               | 0.128                         | Black et al., 2006                                                                                                                                               |
| Lake Biale                     | 1            | 72.00         | 52.500000    | 19.494999     | lacustrine                       | 31.3            | 1.502                         | Wacnik et al., 2011                                                                                                                                              |
| Lake Biwa                      | 4            | 84.00         | 35.245000    | 136.054000    | lacustrine                       | 63              | 670                           | Hayashida et al., 2007; Inoue and Yoshikawa, 2005; Inoue et al., 2001; Inoue et al., 2018; Inoue et al., 2021; Mourguiart and Ledru, 2003; Takemura et al., 2000 |
| Lake Bled                      | 1            | 475.00        | 46.364400    | 14.094700     | lacustrine                       | 30              | 1.45                          | Andrič et al., 2009; Feurdean et al., 2020b; Lane et al., 2011                                                                                                   |
| Lake Brazi                     | 1            | 1740.00       | 45.400000    | 22.901667     | lacustrine                       | 1               | 0.005                         | Finsinger et al., 2018                                                                                                                                           |
| Lake Bucura                    | 1            | 2040.00       | 45.360000    | 22.874167     | lacustrine                       | 17.5            | 0.0892                        | Vincze et al., 2017                                                                                                                                              |
| Lake Burg                      | 1            | 1821.00       | 42.505000    | 1.306111      | lacustrine, glacial origin       | 0.4             | 0.3                           | Bal et al., 2011                                                                                                                                                 |
| Lake Carana                    | 1            | 5.00          | -2.834645    | -55.041785    | lacustrine                       | 3               | 0.7                           | Maezumi et al., 2018                                                                                                                                             |
| Lake Chalalan                  | 1            | 330.00        | -14.420000   | -67.920000    | lacustrine                       | -777777         | -777777                       | Urrego, 2006                                                                                                                                                     |
| Lake Chignahuapan              | 1            | 2570.00       | 19.160000    | -99.530000    | lacustrine, volcanic lake        | 2               |                               | Lozano-García et al., 2005                                                                                                                                       |
| Lake Comprida                  | 1            | 130.00        | -1.620000    | -53.990000    | lacustrine, fluvial origin       | 5               | 0.78                          | Bush et al., 2000                                                                                                                                                |
| Lake Condah                    | 1            | 60.00         | -38.060000   | 141.830000    | lacustrine                       | 0.5             | 1.8                           | Builth et al., 2008                                                                                                                                              |
| Lake Couridjah Thirlmere Lakes | 1            | 310.00        | -34.230000   | 150.540000    | lacustrine                       | 0               |                               | Clark, 1997                                                                                                                                                      |
| Lake Curlip                    | 1            | 2.00          | -37.830000   | 148.560000    | lacustrine                       | 0               |                               | Ladd, 1978                                                                                                                                                       |
| Lake Czarne Bog                | 1            | 147.00        | 54.295000    | 22.059200     | terrestrial, bog                 |                 | 0.06                          | Karpińska-Kołaczek et al., 2014; Karpińska-Kołaczek et al., 2016                                                                                                 |
| Lake Czechowskie               | 1            | 109.00        | 53.874170    | 18.236670     | lacustrine                       | 32              | 0.77                          | Dietze et al., 2019                                                                                                                                              |
| Lake Dojran                    | 1            | 144.00        | 41.191225    | 22.732638     | lacustrine                       | 3               | 43                            | Masi et al., 2018                                                                                                                                                |
| Lake Doukoulou                 | 1            | 400.00        | 4.252778     | 18.423611     | lacustrine                       | 2.35            | 0.36                          | Aleman et al., 2013                                                                                                                                              |
| Lake Dove                      | 1            | 934.00        | -41.660000   | 145.960000    | lacustrine                       | 157             | 0.86                          | Dyson, 1995                                                                                                                                                      |
| Lake Durankulak                | 1            | 0.40          | 43.670000    | 28.550000     | lacustrine                       | 4               | 3                             | Marinova and Atanassova, 2006                                                                                                                                    |
| Lake Eileen                    | 1            | 3135.00       | 40.902000    | -106.673000   | lacustrine                       | 5.73            | 0.012                         | Calder et al., 2015                                                                                                                                              |
| Lake Emily Wisconsin           | 1            | 344.00        | 44.314000    | -93.914300    | lacustrine                       | 11              | 0.44                          | <a href="https://www.ncdc.noaa.gov/paleo/study/21056">https://www.ncdc.noaa.gov/paleo/study/21056</a>                                                            |
| Lake Euramoo                   | 1            | 718.00        | -17.150000   | 145.620000    | lacustrine, volcanic lake        | 18              | -999999                       | Haberle, 2005                                                                                                                                                    |
| Lake Eyre                      | 1            | -15.00        | -28.500000   | 137.250000    | lacustrine, salt lake, permanent | 15              | 9000                          | Gillespie et al., 1991; Luly, 2001                                                                                                                               |
| Lake Facil                     | 1            | 10.00         | -44.325000   | -74.283300    | lacustrine                       | 3               |                               | Szeicz et al., 2003                                                                                                                                              |
| Lake Farskjon                  | 1            | 7.00          | 56.170000    | 14.990000     | -777777                          |                 |                               | Yu et al., 2004; Yu, 2003                                                                                                                                        |

| Site name                  | Entities (#) | Elevation (m) | Latitude (°) | Longitude (°) | Site Type                        | Water depth (m) | Basin size (km <sup>2</sup> ) | Citation(s)                                                                                                           |
|----------------------------|--------------|---------------|--------------|---------------|----------------------------------|-----------------|-------------------------------|-----------------------------------------------------------------------------------------------------------------------|
| Lake Flannigan King Island | 1            | 40.00         | -39.600000   | 143.950000    | terrestrial, bog                 | 0               |                               | D'Costa, 1997                                                                                                         |
| Lake Frome                 | 1            | 40.00         | -30.680000   | 139.780000    | lacustrine, salt lake, permanent | -777777         | 2550                          | Luly and Jacobson, 2000; Singh and Luly, 1991                                                                         |
| Lake Gbali                 | 1            | 400.00        | 4.818611     | 18.262778     | lacustrine                       | 2               | 0.02                          | Aleman et al., 2013                                                                                                   |
| Lake George                | 1            | 673.00        | -35.060000   | 149.410000    | lacustrine                       | -999999         | 155                           | Singh and Geissler, 1985; Singh et al., 1981                                                                          |
| Lake Gropile               | 1            | 1920.00       | 47.579700    | 24.627300     | lacustrine, glacial origin       | 1.15            | 0.038                         | Feurdean et al., 2020b; Florescu et al., 2018                                                                         |
| Lake Habbema               | 1            | 3120.00       | -4.110000    | 138.700000    | lacustrine                       | 0               |                               | Haberle et al., 2001                                                                                                  |
| Lake Hordern               | 1            | 3.00          | -38.784000   | 143.467000    | lacustrine                       | -888888         | -999999                       | Head and Stuart, 1980                                                                                                 |
| Lake Hordorli              | 1            | 680.00        | -2.530000    | 140.550000    | terrestrial, bog                 | 0               |                               | Hope and Tulip, 1994                                                                                                  |
| Lake Huila                 | 2            | 2608.00       | -0.423008    | -78.018008    | lacustrine, volcanic lake        | 1.2             | -999999                       | Loughlin et al., 2018b                                                                                                |
| Lake Ifrah                 | 1            | 1610.00       | 33.559294    | -4.930555     | lacustrine                       | 2               | 2                             | Damnati and Reddad, 2017; Reddad et al., 2013                                                                         |
| Lake Innu                  | 2            | 399.00        | 50.070000    | -68.811000    | lacustrine                       | 7.7             | 0.014                         | Remy et al., 2017; Remy et al., 2018                                                                                  |
| Lake Johnston              | 1            | 900.00        | -41.860000   | 145.550000    | lacustrine                       | 0               |                               | Anker et al., 2001; Dodson et al., 1998                                                                               |
| Lake Khamra                | 1            | 340.00        | 59.990910    | 112.983730    | lacustrine                       | 22              | 4.6                           | Glückler et al., 2020a; Glückler et al., 2020b; Glückler et al., 2020c; Glückler et al., 2020d; Glückler et al., 2021 |
| Lake Kharinei              | 2            | 108.00        | 67.370000    | 62.750000     | lacustrine                       | 16              | 0.5                           | Jones et al., 2011; Salonen et al., 2011                                                                              |
| Lake Kipojarvi             | 1            | 159.40        | 69.300000    | 27.533333     | lacustrine, glacial origin       | 1.5             | 1.6                           | Juutinen et al., 2013; Väiliranta et al., 2011; Wohlfarth et al., 2018                                                |
| Lake Kipojarvi (Kiposuo)   | 1            | 159.40        | 69.300000    | 27.533333     | terrestrial, bog                 | 2.5             | 1.6                           | Juutinen et al., 2013; Wohlfarth et al., 2018                                                                         |
| Lake Kirjavalampi          | 1            | 5.00          | 61.733300    | 30.766700     | lacustrine                       | 4               | 0.024                         | Alenius et al., 2004                                                                                                  |
| Lake Kirkpatrick           | 1            | 570.00        | -45.027060   | 168.573740    | lacustrine                       | -999999         | 0.03                          | McWethy et al., 2014                                                                                                  |
| Lake Kojle                 | 1            | 149.00        | 54.020000    | 22.880000     | terrestrial, bog                 | 33              | 0.17                          | Galka and Obremaska, Unpublished                                                                                      |
| Lake Kumpaka               | 1            | 333.00        | -2.836389    | -77.961389    | lacustrine, volcanic lake        | 19.5            | 0.1385                        | Åkesson et al., 2021                                                                                                  |
| Lake Lia                   | 1            | 1910.00       | 45.350000    | 22.876750     | lacustrine                       | 4.5             | 0.0126                        | Finsinger et al., 2018                                                                                                |
| Lake Lielais Svetinu       | 2            | 96.20         | 56.760682    | 27.149276     | lacustrine                       | 4               | 0.188                         | Feurdean et al., 2017b; Stivrins et al., 2015b                                                                        |
| Lake Lisan                 | 2            | -430.00       | 31.510000    | 35.470000     | lacustrine                       | -999999         | 760                           | Kitagawa et al., 2017; Miebach et al., 2019                                                                           |
| Lake Llet-Ti               | 1            | 50.00         | 66.538889    | 59.331389     | lacustrine                       | 1.5             | -999999                       | Väiliranta et al., 2006                                                                                               |
| Lake Lucerne               | 1            | 434.00        | 47.050000    | 8.590000      | lacustrine                       | 110             | 113.6                         | Thevenon and Anselmetti, 2007                                                                                         |
| Lake Majo                  | 1            | 140.00        | -1.460000    | 127.480000    | lacustrine                       | 0               |                               | Haberle and Ledru, 2001                                                                                               |
| Lake Martha Wright County  | 1            | 295.00        | 45.142200    | -93.739200    | lacustrine                       | 6.7             | 0.38                          | <a href="https://www.ncdc.noaa.gov/paleo/study/21073">https://www.ncdc.noaa.gov/paleo/study/21073</a>                 |
| Lake Miragoane             | 1            | 20.00         | 18.400000    | -73.050000    | lacustrine, tectonic origin      | 41              | 7.06                          | Higuera-Gundy et al., 1999                                                                                            |
| Lake Mountain              | 1            | 1450.00       | -37.460000   | 145.870000    | terrestrial, bog                 | 0               |                               | McKenzie, 1997                                                                                                        |
| Lake Naleng                | 1            | 4200.00       | 31.100000    | 99.750000     | lacustrine                       | -999999         | 1.8                           | Kramer et al., 2010                                                                                                   |
| Lake Nguengue              | 1            | 385.00        | 3.761111     | 18.121944     | lacustrine                       | 2.3             | 0.14                          | Aleman et al., 2013                                                                                                   |
| Lake Nicaragua             | 1            | 30.00         | 11.762580    | -85.872528    | lacustrine, tectonic origin      | -777777         | 8264                          | Dull et al., 2010                                                                                                     |

| Site name                     | Entities (#) | Elevation (m) | Latitude (°) | Longitude (°) | Site Type                   | Water depth (m) | Basin size (km <sup>2</sup> ) | Citation(s)                                                           |
|-------------------------------|--------------|---------------|--------------|---------------|-----------------------------|-----------------|-------------------------------|-----------------------------------------------------------------------|
| Lake Njargajavri              | 1            | 355.00        | 69.866667    | 27.166667     | lacustrine                  | 2               | -999999                       | Väliranta et al., 2005                                                |
| Lake of the Clouds (COHMAP2k) | 1            | 462.00        | 48.000000    | -91.016667    | lacustrine                  | 12              | 0.5                           | Swain, 1978                                                           |
| Lake Okadensko                | 1            | 2475.00       | 41.780000    | 23.350000     | lacustrine, glacial origin  | 0               | -999999                       | Atanassova and Stefanova, 2005                                        |
| Lake Oltina                   | 1            | 40.00         | 44.140000    | 27.630800     | lacustrine, fluvial origin  | 2               | 33                            | Feurdean et al., 2020b; Feurdean et al., 2021                         |
| Lake Orijarvi, Mikkeli        | 1            | 89.70         | 61.662891    | 27.211239     | lacustrine                  | 5               | 0.288                         | Alenius et al., 2007                                                  |
| Lake Ostrezko-2               | 1            | 2320.00       | 42.130000    | 23.460000     | lacustrine                  | 1.5             | 0.15                          | Tonkov and Marinova, 2005                                             |
| Lake Ostrezko-3               | 1            | 2340.00       | 42.130000    | 23.460000     | lacustrine                  | 1.7             | 0.1                           | Tonkov and Marinova, 2005                                             |
| Lake Oswego                   | 1            | 30.00         | 45.410000    | -122.660000   | lacustrine                  | 17              | 1.64                          | Walsh et al., 2010b                                                   |
| Lake Pacucha                  | 1            | 3095.00       | -13.607200   | -73.495000    | lacustrine                  | 30              | 7.5                           | Hillyer et al., 2009; Valencia et al., 2010                           |
| Lake Parishan                 | 1            | 823.00        | 29.513890    | 51.802220     | lacustrine                  | 2.1             | -999999                       | Djamali et al., 2016                                                  |
| Lake Pata                     | 1            | 300.00        | 0.260000     | -66.060000    | lacustrine                  | 7               | -999999                       | Bush and de Oliveira, 2006; Bush, Unpublished; Colinvaux et al., 1996 |
| Lake Pikku Harkajarvi         | 1            | 188.00        | 68.853200    | 28.644700     | lacustrine                  | 6.4             | 0.0373                        | Stivrins, Unpublished                                                 |
| Lake Refugio1                 | 1            | 3401.00       | -13.091358   | -71.708429    | lacustrine                  | 1.6             | -999999                       | Urrego et al., 2011                                                   |
| Lake Refugio2                 | 1            | 3406.00       | -13.094888   | -71.705260    | lacustrine                  | 2               | -999999                       | Urrego et al., 2011                                                   |
| Lake Refugio3                 | 1            | 3404.00       | -13.099145   | -71.703140    | lacustrine                  | 2.5             | -999999                       | Urrego et al., 2011                                                   |
| Lake Rosalia                  | 1            | 180.00        | 68.912800    | 28.369200     | lacustrine                  | 9               | 0.03017                       | Stivrins, Unpublished                                                 |
| Lake Ruskowiejskie            | 1            | 144.00        | 53.950000    | 21.311700     | lacustrine                  | 11.5            | 0.291                         | Szal et al., 2017                                                     |
| Lake Rutundu                  | 1            | 3140.00       | -0.040000    | 37.460000     | lacustrine                  | 11              | 0.4                           | Wooller et al., 2003                                                  |
| Lake Ryssjon                  | 1            | 5.00          | 56.170000    | 15.080000     | -777777                     |                 |                               | Yu et al., 2008; Yu, 2003                                             |
| Lake Salet                    | 1            | 132.00        | 53.940000    | 21.322400     | lacustrine                  | 17.2            | 3.277                         | Szal et al., 2014                                                     |
| Lake Santa Rosa               | 1            | 350.00        | -14.470000   | -67.870000    | lacustrine                  | -777777         | -777777                       | Urrego, 2006                                                          |
| Lake Selina                   | 1            | 516.00        | -41.880000   | 145.600000    | lacustrine                  | 6.5             | -999999                       | Colhoun et al., 1999                                                  |
| Lake Sibaya                   | 1            | 20.00         | -27.200000   | 32.360000     | lacustrine                  | 15              |                               | Neumann et al., 2008                                                  |
| Lake Sidi Ali                 | 1            | 2080.00       | 33.068430    | -4.998376     | lacustrine                  | 40              | 2.8                           | Campbell et al., 2017                                                 |
| Lake Skogstjern               | 1            | 57.20         | 59.007050    | 9.638547      | lacustrine, glacial origin  | 4.1             | 0.026                         | Wieckowska-Lüth et al., 2017                                          |
| Lake Skrzyzka                 | 1            | 121.00        | 53.810000    | 17.521400     | lacustrine                  | 4.3             | 0.21                          | Apolinarska et al., 2012                                              |
| Lake Stiol                    | 1            | 1670.00       | 47.570000    | 24.813600     | lacustrine, glacial origin  | 1.3             | 0.016                         | Feurdean et al., 2020b; Haliuc et al., 2016                           |
| Lake Stiucii                  | 1            | 240.00        | 46.970000    | 23.899700     | lacustrine                  | 6               | 0.38                          | Feurdean et al., 2013; Feurdean et al., 2020b                         |
| Lake Suchar IV                | 1            | 143.00        | 54.090000    | 23.024700     | lacustrine, glacial origin  | 8               | 0.0095                        | Zawisza et al., 2019                                                  |
| Lake Suho Breznishko          | 1            | 1963.00       | 41.810000    | 23.350000     | lacustrine, glacial origin  | 1               | 0.01                          | Atanassova and Stefanova, 2005                                        |
| Lake Suminko                  | 1            | 163.00        | 54.180000    | 17.798333     | lacustrine                  | 17.2            | 0.15                          | Pędziszewska et al., 2015                                             |
| Lake Surprise                 | 1            | 93.00         | -38.060000   | 141.920000    | lacustrine, volcanic lake   | 12              | 0.126                         | Builth et al., 2008                                                   |
| Lake Svarcenberk              | 1            | 412.00        | 49.145833    | 14.705000     | lacustrine, drained lake    | -888888         | 0.5                           | Pokorný and Jankovská, 2000; Pokorný, 2002                            |
| Lake Tanganyika               | 1            | 773.00        | -6.550000    | 29.970000     | lacustrine, tectonic origin | 309             |                               | Tierney et al., 2010                                                  |

| Site name                           | Entities (#) | Elevation (m) | Latitude (°) | Longitude (°) | Site Type                        | Water depth (m) | Basin size (km <sup>2</sup> ) | Citation(s)                                |
|-------------------------------------|--------------|---------------|--------------|---------------|----------------------------------|-----------------|-------------------------------|--------------------------------------------|
| Lake Teletskoye                     | 1            | 1900.00       | 51.529167    | 87.714722     | lacustrine                       | 325             | 233                           | Andreev et al., 2007; Kalugin et al., 2005 |
| Lake Teza                           | 1            | 8.00          | -28.510000   | 32.300000     | lacustrine                       | 0               |                               | Scott, 2002                                |
| Lake Tilla                          | 1            | 690.00        | 10.544598    | 12.131373     | lacustrine, volcanic lake        | 4.5             | 0.8                           | Salzmann et al., 2002                      |
| Lake Titicaca                       | 1            | 3810.00       | -16.130000   | -69.150000    | lacustrine, tectonic origin      | 152             | 8500                          | Paduano et al., 2003                       |
| Lake Tritrivakely                   | 1            | 1514.00       | -19.780000   | 46.910000     | lacustrine, volcanic lake        | 0               |                               | Burney, 1987                               |
| Lake Tulane                         | 2            | 36.00         | 27.585000    | -81.503600    | lacustrine                       | 25              | 0.36                          | Grimm et al., 1993; Grimm et al., 2006     |
| Lake Tumbulovaty (Khosedayu mire 1) | 1            | 110.00        | 67.116667    | 59.566667     | terrestrial, bog                 | 0               | -999999                       | Kultti et al., 2004                        |
| Lake Tumbulovaty (Khosedayu mire 2) | 1            | 110.00        | 67.116667    | 59.566667     | terrestrial, bog                 | 0               | -999999                       | Kultti et al., 2004                        |
| Lake Tumbulovaty (Khosedayu mire 3) | 2            | 90.00         | 67.166667    | 59.500000     | terrestrial, bog                 | 0               | -999999                       | Kultti et al., 2004                        |
| Lake Tyrrell                        | 2            | 42.00         | -35.310000   | 142.780000    | lacustrine, salt lake, permanent | 0               |                               | Luly et al., 1986; Luly, 1993              |
| Lake Urmia                          | 1            | 1265.00       | 37.793610    | 45.375830     | lacustrine, tectonic origin      | 12              | 5000                          | Djamali et al., 2008                       |
| Lake Van                            | 1            | 1648.00       | 38.550000    | 42.530000     | lacustrine, tectonic origin      | 430             |                               | Wick et al., 2003a                         |
| Lake Wangoom                        | 1            | 100.00        | -38.350000   | 142.600000    | lacustrine, volcanic lake        |                 | 1.13                          | Harle et al., 2002                         |
| Lake Wodehouse                      | 1            | 500.00        | 7.650000     | -77.550000    | terrestrial, marsh               | 0               | 9                             | Bush and Colinvaux, 1994                   |
| Landing Lake                        | 1            | 394.00        | 65.903370    | -145.777070   | lacustrine                       | 4.2             | -999999                       | Kelly et al., 2013                         |
| Lantianyan peat bog                 | 2            | 902.00        | 28.430000    | 119.310000    | terrestrial, bog                 |                 | -999999                       | Ma et al., 2018b                           |
| Lanzahita                           | 1            | 588.00        | 40.222200    | -4.935800     | terrestrial, bog                 | -888888         | 0.00015                       | López-Sáez et al., 2017b                   |
| Lanzhot                             | 1            | 150.00        | 48.710000    | 16.950639     | terrestrial, fen                 | -888888         | 0.45                          | Jamrichová, Unpublished                    |
| Laravita                            | 1            | 3570.00       | -8.390000    | 147.350000    | terrestrial, bog                 | 0               |                               | Hope, 2009                                 |
| Larix Hollow                        | 1            | 155.00        | 61.845917    | 37.756500     | terrestrial, small hollow        | -888888         | 0.001                         | Kuosmanen et al., 2014                     |
| Las Animas Mire                     | 2            | 1403.00       | 36.685800    | -5.030000     | terrestrial, bog                 | -888888         | 2e-04                         | Alba-Sánchez et al., 2019                  |
| Las Pardillas                       | 1            | 1850.00       | 42.033300    | -3.033300     | lacustrine                       | 1.5             | 0.005                         | Sánchez-Gofí and Hannon, 1999              |
| Las Vinuelas                        | 2            | 761.00        | 39.374400    | -4.488400     | terrestrial, bog                 | -888888         | 2e-04                         | Morales-Molino et al., 2019                |
| Lashmars Lagoon                     | 1            | 2.00          | -35.800000   | 138.067000    | lacustrine                       | -999999         | 0.5                           | Clark, 1983                                |
| Last Chance                         | 1            | 250.00        | 67.070000    | -150.750000   | lacustrine, thermokarst origin   | 8.5             | 0.34                          | Higuera, 2006                              |
| Lasva                               | 1            | 72.20         | 57.859444    | 27.175000     | lacustrine                       | 19.15           | 0.11                          | Niinemets and Saarse, 2007a                |
| Latitude Lake                       | 1            | -999999.00    | 65.926890    | -146.142230   | lacustrine                       | 17.5            | -999999                       | Kelly et al., 2013                         |
| Lattok Arjeplog                     | 1            | 480.00        | 65.956944    | 18.345000     | lacustrine, glacial origin       | 5.1             | 0.011                         | Carcaillet et al., 2007                    |

| Site name                  | Entities (#) | Elevation (m) | Latitude (°) | Longitude (°) | Site Type          | Water depth (m) | Basin size (km <sup>2</sup> ) | Citation(s)                                                                                           |
|----------------------------|--------------|---------------|--------------|---------------|--------------------|-----------------|-------------------------------|-------------------------------------------------------------------------------------------------------|
| Laukutu Swamp              | 1            | 20.00         | -9.470000    | 160.080000    | terrestrial, bog   | 0               |                               | Haberle, 1996                                                                                         |
| LB01 (North Quebec)        | 1            | 200.00        | 57.920000    | -75.620000    | lacustrine         | 10.28           | 0.06                          | Gajewski, 2019                                                                                        |
| Le Vernay                  | 1            | 595.00        | 47.261944    | 4.079167      | terrestrial, bog   | -888888         | -999999                       | Jouffroy-Bapicot et al., 2013; Jouffroy-Bapicot, 2010                                                 |
| Lebel                      | 1            | 22.00         | 49.098300    | -68.221600    | terrestrial, bog   | -888888         | -999999                       | Magnan et al., 2014                                                                                   |
| Leguna Castilla            | 1            | 976.00        | 18.797800    | -70.876100    | lacustrine         | 4.5             | -999999                       | Lane et al., 2009                                                                                     |
| Lej da San Murrezzan       | 1            | 1768.00       | 46.490000    | 9.840000      | lacustrine         | 44              | 0.78                          | Gobet et al., 2003                                                                                    |
| Lena                       | 1            | 50.00         | 69.380000    | 125.130000    | terrestrial, bog   | -888888         | 3                             | Jasinski et al., 1998                                                                                 |
| Les Amburnex Mire          | 1            | 1370.00       | 46.539720    | 6.231667      | terrestrial, bog   | -888888         | 0.002                         | Sjögren and Lamentowicz, 2008                                                                         |
| Les Comailles              | 1            | 215.00        | 47.660000    | 3.220000      | terrestrial, bog   | 0               |                               | Vannière and Rius, Unpublished                                                                        |
| LG4-01                     | 1            | 470.00        | 54.035800    | -72.872800    | lacustrine         | -999999         | 0.003                         | Carcaillet and Richard, 2000; Carcaillet et al., 2002                                                 |
| LG4-05                     | 1            | 350.00        | 54.063300    | -72.915300    | lacustrine         | -999999         | 0.001                         | Carcaillet and Richard, 2000; Carcaillet et al., 2002                                                 |
| LG4-06                     | 1            | 365.00        | 54.075000    | -72.941900    | lacustrine         | -999999         | 0.071                         | Carcaillet and Richard, 2000; Carcaillet et al., 2002                                                 |
| LG4-09                     | 1            | 442.00        | 54.901100    | -72.777200    | lacustrine         | -999999         | 0.053                         | Carcaillet and Richard, 2000; Carcaillet et al., 2002                                                 |
| LG4-12                     | 1            | 534.00        | 52.842800    | -73.316400    | lacustrine         | -999999         | 0.038                         | Carcaillet and Richard, 2000; Carcaillet et al., 2002                                                 |
| Liang Jia Cun              | 2            | 640.00        | 34.450000    | 107.670000    | terrestrial, loess |                 | -999999                       | Tan et al., 2018                                                                                      |
| Liang Jia Yao              | 1            | 640.00        | 34.450000    | 107.670000    | terrestrial, loess |                 | -999999                       | Tan et al., 2013                                                                                      |
| Liangjing village          | 1            | -999999.00    | 22.950000    | 114.570000    | lacustrine         | 7.2             | 0.8                           | Chen et al., 2014                                                                                     |
| Liangzhu City              | 1            | -999999.00    | 30.470000    | 120.070000    | terrestrial        |                 | -999999                       | Liu, 2014                                                                                             |
| Libouse                    | 1            | 1806.00       | 44.590000    | 6.320000      | terrestrial, bog   |                 |                               | Court-Picon, 2007                                                                                     |
| Lielais Vīpēdis            | 1            | 96.00         | 56.591480    | 23.000940     | lacustrine         | 4               | 21                            | Stivrins, Unpublished                                                                                 |
| Lijiyuan                   | 1            | 1850.00       | 36.110000    | 104.850000    | terrestrial, loess | 0               |                               | Wang et al., 2005                                                                                     |
| Lilaste lake               | 1            | 0.50          | 57.179000    | 24.351639     | coastal            | 2               | 1.8                           | Grudzinska et al., 2017; Stivrins, Unpublished                                                        |
| Lili Bog                   | 3            | 317.00        | 49.172300    | -79.370300    | terrestrial, bog   | -888888         | -999999                       | Magnan et al., 2020                                                                                   |
| Lili Lake                  | 1            | 320.00        | 49.173750    | -79.374147    | lacustrine         | 1.4             | 0.19                          | Remy et al., 2018                                                                                     |
| Lilla Glopssjon            | 1            | 198.00        | 59.802778    | 14.627778     | lacustrine         | 27              | 0.05                          | Almquist-Jacobson, 1994                                                                               |
| Lille Kjelavatn            | 1            | 978.00        | 59.796111    | 7.001944      | lacustrine         | 3.5             | 0.005                         | Eide et al., 2005                                                                                     |
| Lily Lake Warner Mountains | 1            | 2042.00       | 41.975800    | -120.209700   | lacustrine         | -999999         | 0.037                         | Minckley et al., 2007                                                                                 |
| Lily Lake Waseca County    | 1            | 311.00        | 44.191200    | -93.640100    | lacustrine         | 7               | 0.46                          | <a href="https://www.ncdc.noaa.gov/paleo/study/21070">https://www.ncdc.noaa.gov/paleo/study/21070</a> |
| Lily Pond New Salem        | 1            | 303.00        | 42.418100    | -72.346800    | lacustrine         | 3               | -999999                       | Foster et al., 2002a                                                                                  |
| Lily Pond Warwick          | 1            | 269.00        | 42.680000    | -72.330000    | lacustrine         | 1.32            | 0.008                         | Fuller et al., 1998; Parshall and Foster, 2002                                                        |
| Lin                        | 2            | 2.00          | 61.480000    | -163.430000   | lacustrine         | 1               | 0.003                         | Sae-Lim et al., 2019                                                                                  |
| Lingtai section            | 1            | 1400.00       | 35.000000    | 107.500000    | terrestrial, loess | 0               |                               | Wang et al., 2005                                                                                     |
| Linje                      | 2            | 90.00         | 53.187352    | 18.309571     | terrestrial, bog   | -888888         | 0.0595                        | Marcisz et al., 2015                                                                                  |
| Lios Lairthin Mor          | 1            | 270.00        | 53.080000    | -9.210000     | terrestrial, bog   | -888888         | -999999                       | Jeličić and O'Connell, 1992                                                                           |
| Lisletonn                  | 1            | 520.00        | 59.343610    | 7.305000      | lacustrine         | 7.1             | -999999                       | Birks, 2006                                                                                           |
| Litlvatnet                 | 1            | 106.00        | 68.526940    | 14.930830     | lacustrine         | 6               | -999999                       | Bjune et al., 2008                                                                                    |
| Little Isac                | 1            | 210.00        | 67.941083    | -160.797111   | lacustrine         | 5.4             | 0.029                         | Higuera et al., 2011                                                                                  |

| Site name                   | Entities (#) | Elevation (m) | Latitude (°) | Longitude (°) | Site Type                   | Water depth (m) | Basin size (km <sup>2</sup> ) | Citation(s)                                                            |
|-----------------------------|--------------|---------------|--------------|---------------|-----------------------------|-----------------|-------------------------------|------------------------------------------------------------------------|
| Little Lake, Oregon         | 2            | 210.00        | 44.167778    | -123.582222   | lacustrine, tectonic origin | 10              | 0.015                         | Grigg and Whitlock, 1998; Long et al., 2007; Worona and Whitlock, 1995 |
| Little Molas Lake           | 1            | 3370.00       | 37.740000    | -107.700000   | lacustrine                  | 0               |                               | Anderson et al., 2008a; Toney and Anderson, 2006                       |
| Little Pine Lake (COHMAP2k) | 1            | 334.00        | 45.283333    | -91.483333    | lacustrine                  | 5               | 0.065                         | Gajewski et al., 1985                                                  |
| Little Pond, Bolton         | 1            | 99.00         | 42.422340    | -71.587738    | lacustrine                  | 3.2             | 0.05                          | Fuller et al., 1998; Oswald, Unpublished; Parshall and Foster, 2002    |
| Little Pond, Royalston      | 1            | 302.00        | 42.675000    | -72.191670    | lacustrine                  | -999999         | 0.04                          | Oswald et al., 2007; Oswald, Unpublished                               |
| Litzelsee                   | 1            | 413.00        | 47.770000    | 8.930600      | lacustrine                  | 8               | 0.013                         | Rösch and Lechterbeck, 2016                                            |
| Liupanshan Mountain         | 1            | 1400.00       | 35.870000    | 106.780000    | terrestrial, loess          |                 | -999999                       | Tan et al., 2013                                                       |
| Ljustjärnen                 | 1            | 183.00        | 59.750000    | 14.430000     | lacustrine                  | 0               |                               | Almquist-Jacobson, 1994                                                |
| LM01 (North Quebec)         | 1            | 320.00        | 55.620000    | -74.580000    | lacustrine                  | 7.75            | 0.02                          | Gajewski, 2019                                                         |
| Lobsigensee                 | 1            | 514.00        | 47.030000    | 7.290000      | lacustrine, glacial origin  | 3               |                               | Ammann, 1989                                                           |
| Loch a'Bhogaidh             | 1            | 65.00         | 55.725000    | -6.403333     | terrestrial, mire           | -888888         | 0.175                         | Edwards and Berridge, 1994                                             |
| Loch a'Phuinnd              | 1            | 10.00         | 57.366667    | -7.266667     | lacustrine                  | 5.7             | 0.015                         | Fossitt, 1996                                                          |
| Loch an Amair               | 1            | 315.00        | 57.280000    | -4.890000     | lacustrine, glacial origin  | 3.25            | 0.008                         | Froyd, 2006                                                            |
| Loch an t'Suidhe            | 1            | 32.00         | 56.312599    | -6.253752     | lacustrine                  | 1.5             | 0.002                         | Edwards et al., 2007                                                   |
| Loch Buailaval Beag         | 1            | 50.00         | 58.265056    | -6.770299     | lacustrine                  | 3.5             | 0.01                          | Fossitt, 1996                                                          |
| Loch Laxford                | 1            | 0.00          | 58.360000    | -5.000000     | coastal, estuarine          | -888888         | -999999                       | Stefanova et al., 2008; Weiss et al., 2002                             |
| Loch of Clickimin           | 1            | 1.00          | 60.150238    | -1.165115     | coastal                     | 2               | 0.175                         | Edwards et al., 2005                                                   |
| Loch of Knitchen            | 1            | 160.00        | 59.130000    | -3.000000     | -777777                     |                 |                               | Bunting, 1996                                                          |
| Loch of Torness             | 1            | 15.00         | 58.770000    | -3.290000     | -777777                     |                 |                               | Bunting, 1996                                                          |
| Loch Sport Swamp            | 1            | 2.00          | -37.960000   | 147.680000    | terrestrial, fen            | 0               |                               | Hooley et al., 1980                                                    |
| Lochan na h-Inghinn         | 1            | 65.00         | 58.250000    | -5.090000     | lacustrine, glacial origin  | 3.14            | 0.01                          | Froyd, 2006                                                            |
| Lombok Ridge Core G6-4 B    | 1            | -3510.00      | -10.780000   | 118.060000    | marine                      | 3510            |                               | Wang et al., 1999                                                      |
| Lone Pine Lake              | 1            | 3016.00       | 40.232733    | -105.731650   | lacustrine                  | 10              | 0.048                         | Higuera et al., 2014                                                   |
| Long Breach                 | 1            | 341.00        | 51.065870    | -3.687402     | terrestrial, mire           | -888888         | -999999                       | Fyfe et al., 2003                                                      |
| Long Gang Volcanic Field    | 1            | 500.00        | 42.310000    | 126.280000    | terrestrial, bog            |                 | 3.14                          | Meng et al., 2019                                                      |
| Long Swamp                  | 1            | 2.00          | -38.080000   | 141.080000    | terrestrial, fen            | -888888         | -999999                       | Head, 1988                                                             |
| Longgan Lake                | 1            | 12.10         | 30.160000    | 116.160000    | lacustrine                  | 3.78            | 316                           | Yang et al., 2002                                                      |
| Loon Lake                   | 1            | 140.00        | 67.929269    | -161.966944   | lacustrine                  | 12.2            | 0.14                          | Chipman and Hu, 2017                                                   |
| Lost Lake                   | 1            | 449.00        | 45.822988    | -123.579517   | lacustrine, fluvial origin  | 6               | 0.06                          | Long et al., 2007                                                      |
| Lough Catherine             | 1            | 60.00         | 54.700000    | -7.466670     | lacustrine                  | 6.5             | 0.4                           | Hirons and Edwards, 1986                                               |
| Lough Maumeen               | 1            | 250.00        | 53.405608    | -10.022521    | lacustrine, glacial origin  | 5               | 0.56                          | Huang, 2002                                                            |
| Lough Mullaghlahan          | 1            | 40.00         | 54.775000    | -8.466944     | lacustrine                  | 5.6             | 0.005                         | Fossitt, 1994                                                          |
| Lough Nabraddan             | 1            | 20.00         | 55.016700    | -8.350000     | lacustrine                  | 5.6             | 0.006                         | Fossitt, 1994                                                          |



| Site name                                  | Entities (#) | Elevation (m) | Latitude (°) | Longitude (°) | Site Type                   | Water depth (m) | Basin size (km <sup>2</sup> ) | Citation(s)                                                            |
|--------------------------------------------|--------------|---------------|--------------|---------------|-----------------------------|-----------------|-------------------------------|------------------------------------------------------------------------|
| Loutre Lake                                | 1            | 274.00        | 49.711694    | -78.335833    | lacustrine                  | 10.63           | 0.021                         | Ali et al., 2009                                                       |
| Lovnas Arjeplog                            | 1            | 515.00        | 66.310833    | 17.900833     | lacustrine, glacial origin  | 3.7             | 0.003                         | Carcaillet et al., 2007                                                |
| Lower Gaylor Lake                          | 1            | 3062.00       | 37.909380    | -119.286309   | lacustrine                  | 3.7             | 0.03                          | Hallett and Anderson, 2010                                             |
| LR01 (North Quebec)                        | 1            | 170.00        | 58.580000    | -75.250000    | lacustrine                  | 9.13            | 0.02                          | Gajewski, 2019                                                         |
| LR03 (North Quebec)                        | 1            | 160.00        | 58.570000    | -75.220000    | lacustrine                  | 10.8            | 0.022                         | Gajewski, 2019                                                         |
| LT01 (North Quebec)                        | 1            | 150.00        | 59.140000    | -75.150000    | lacustrine                  | 3.4             | 0.075                         | Gajewski, 2019                                                         |
| Lucky Lake                                 | 1            | -999999.00    | 66.017370    | -145.525010   | lacustrine                  | 9.4             | -999999                       | Kelly et al., 2013                                                     |
| Lugovoe mire<br>Western Sayan<br>Mountains | 1            | 1299.00       | 52.862500    | 94.355000     | terrestrial, mire           | -888888         | -999999                       | Blyakharchuk et al., 2019b                                             |
| Lugu Lake                                  | 1            | 2692.20       | 27.680000    | 100.800000    | lacustrine, tectonic origin | 44              | 57.7                          | Liao, 2017                                                             |
| Luka                                       | 1            | 226.00        | 49.196806    | 24.512778     | terrestrial, buried fen     | -888888         | 0.06                          | Kořaczek et al., 2018a                                                 |
| Luoyang basin                              | 1            | -999999.00    | 34.650000    | 112.650000    | archaeological site         |                 | -999999                       | Wang, 2015                                                             |
| Lynchs Crater                              | 2            | 760.00        | -17.360000   | 145.700000    | lacustrine, drained lake    | -888888         | 0.4                           | Kershaw et al., 2007a; Kershaw, 1983                                   |
| M14                                        | 1            | 330.00        | 50.075556    | -95.402222    | lacustrine                  | 1.2             | 0.086                         | Waito et al., 2018                                                     |
| M15                                        | 1            | 337.00        | 49.785833    | -95.190278    | lacustrine                  | 5.7             | 0.053                         | Waito et al., 2018                                                     |
| M16                                        | 1            | 341.00        | 49.815833    | -95.265556    | lacustrine                  | 2.5             | 0.05                          | Waito et al., 2018                                                     |
| M34                                        | 1            | 290.00        | 50.230000    | -95.577778    | lacustrine                  | 4.5             | 0.043                         | Waito et al., 2018                                                     |
| Maardu                                     | 1            | 31.30         | 59.441667    | 25.000000     | lacustrine                  | 0.9             | 1.59                          | Veski, 1998                                                            |
| Madeleine                                  | 1            | 800.00        | 47.672200    | -70.719400    | lacustrine                  | 3.8             | 0.083                         | Carcaillet and Richard, 2000                                           |
| Mago Island                                | 1            | 2.00          | -17.440000   | 179.150000    | terrestrial, bog            | 0               |                               | Hope et al., 2009                                                      |
| Mai Maikden I                              | 1            | 2228.00       | 13.583833    | 39.364600     | terrestrial                 | -888888         | -999999                       | Gebru et al., 2009                                                     |
| Mai Maikden II                             | 1            | 2228.00       | 13.583625    | 39.568911     | terrestrial                 | -888888         | -999999                       | Gebru et al., 2009                                                     |
| Mai Maikden III                            | 1            | 2228.00       | 13.578578    | 39.567956     | terrestrial                 | -888888         | -999999                       | Gebru et al., 2009                                                     |
| Main Lake Tower Hill                       | 1            | 20.00         | -38.310000   | 142.360000    | lacustrine                  | 0               |                               | D'Costa et al., 1989                                                   |
| Mala niva                                  | 1            | 753.00        | 48.913760    | 13.816060     | terrestrial, bog            | -888888         | 0.8                           | Bobek et al., 2019; Kozáková et al., 2021; Svobodová et al., 2001      |
| Maligne Lake                               | 2            | 1675.00       | 52.708479    | -117.608897   | lacustrine                  | 35              | 19.71                         | Kearney and Luckman, 1983a; Kearney and Luckman, 1987                  |
| Mallard Lake                               | 1            | 570.00        | 51.287669    | -101.324722   | lacustrine                  | 8.78            | 0.08                          | Teed et al., 2009                                                      |
| Maio Jezero                                | 1            | 0.00          | 42.783300    | 17.350000     | lacustrine                  | 29              | 0.25                          | Colombaroli et al., 2009; Jahns and van den Bogaard, 1998; Jahns, 2002 |
| Maluyo Swamp                               | 1            | 5.00          | 18.180000    | 121.580000    | terrestrial                 | -888888         |                               | Stevenson, Unpublished                                                 |
| Manaderos                                  | 1            | 1292.00       | 40.342400    | -4.693900     | terrestrial, bog            | -888888         | 5e-05                         | Bisculm et al., 2012                                                   |
| Manic                                      | 1            | 22.00         | 49.118300    | -68.305000    | terrestrial, bog            | -888888         | 5.38                          | Magnan et al., 2014                                                    |
| Mannikjarve                                | 1            | 90.00         | 58.866700    | 26.250000     | terrestrial, bog            | -888888         | 3.2                           | Sillasoo et al., 2007; Sillasoo et al., 2011                           |
| Mansell Pond                               | 1            | 58.00         | 45.041670    | -68.733000    | lacustrine                  | 7               | 0.04                          | Almquist-Jacobson and Sanger, 1995                                     |
| Manzherok Lake Altai<br>Mts.               | 1            | 423.00        | 51.820800    | 85.809700     | lacustrine                  | 3               | 0.5                           | Blyakharchuk et al., 2017                                              |

| Site name               | Entities (#) | Elevation (m) | Latitude (°) | Longitude (°) | Site Type                      | Water depth (m) | Basin size (km <sup>2</sup> ) | Citation(s)                                                                                           |
|-------------------------|--------------|---------------|--------------|---------------|--------------------------------|-----------------|-------------------------------|-------------------------------------------------------------------------------------------------------|
| Marais du Grand-Chaumet | 1            | 140.00        | 46.930000    | 1.900000      | terrestrial, fen               | -777777         |                               | Vannière and Laggoun-Défarge, 2002; Vannière, 2001                                                    |
| Maralay Alas            | 1            | 134.00        | 63.116667    | 130.600000    | lacustrine, thermokarst origin | -888888         | 1.21                          | Katamura et al., 2006; Katamura et al., 2009a                                                         |
| Marbore                 | 1            | 2612.00       | 42.695631    | 0.040019      | lacustrine                     | 30              | 0.1                           | Leunda et al., 2017                                                                                   |
| Marcacocha              | 1            | 3355.00       | -13.210000   | -72.200000    | lacustrine                     | 0               |                               | Chepstow-Lusty et al., 1998                                                                           |
| Marcella Lake           | 2            | 697.00        | 60.073611    | -133.807777   | lacustrine                     | 9.7             | 0.04                          | Anderson et al., 2005; Edwards et al., 2015; Franklin-Smith, 2007                                     |
| Mare Tatos              | 2            | 21.00         | -20.212222   | 57.772778     | -777777                        |                 |                               | Gosling et al., 2017                                                                                  |
| Martins                 | 1            | 1415.00       | 47.710000    | -123.540000   | lacustrine                     | 0               |                               | Gavin et al., 2001                                                                                    |
| Marys Pond HF           | 1            | 26.00         | 41.506151    | -70.713474    | lacustrine                     | -999999         | -999999                       | Unpublished                                                                                           |
| Masatjornet             | 1            | 841.00        | 61.562500    | 10.267770     | lacustrine                     | 3.6             | -999999                       | Birks et al., 2012                                                                                    |
| Masoko                  | 2            | 770.00        | -9.330000    | 33.750000     | lacustrine, volcanic lake      | 39              |                               | Thevenon et al., 2003                                                                                 |
| Matsabory Ampozalana    | 1            | 740.00        | -12.500000   | 49.150000     | terrestrial, bog               | -888888         | -888888                       | Burney, 1987                                                                                          |
| Maxus                   | 1            | 3.00          | -0.700000    | -76.450000    | lacustrine, fluvial origin     | 0               |                               | Athens and Ward, 1999                                                                                 |
| McGinnis                | 1            | 256.00        | 44.600000    | -78.030000    | lacustrine                     | 18              |                               | Carcaillet et al., 2006                                                                               |
| McKay                   | 1            | 302.00        | 57.228333    | -111.700000   | terrestrial, bog               | -888888         | -999999                       | Magnan et al., 2018                                                                                   |
| McKenzie Road Bog       | 1            | 50.00         | -38.430000   | 146.760000    | terrestrial, bog               | 0.5             |                               | Robertson, 1986                                                                                       |
| McMurray                | 1            | 387.00        | 56.627778    | -111.194167   | terrestrial, bog               | -888888         | -999999                       | Magnan et al., 2018                                                                                   |
| MD04-2845               | 1            | -4175.00      | 45.350000    | -5.210000     | marine                         | -888888         | -888888                       | Daniau et al., 2009                                                                                   |
| MD95-2042               | 2            | -3146.00      | 37.750000    | -10.160000    | marine                         | -888888         | -888888                       | Bard et al., 2013; Chabaud et al., 2014; Daniau et al., 2007                                          |
| MD96-2098               | 1            | -2909.00      | -25.600000   | 12.630000     | marine                         |                 |                               | Daniau et al., 2013                                                                                   |
| MD97-2140               | 1            | -2547.00      | 2.060000     | 142.260000    | marine                         | 2547            |                               | Thevenon et al., 2004                                                                                 |
| Mechacz Wielki          | 1            | 200.00        | 54.331974    | 22.441504     | terrestrial, bog               | -888888         | 1.47                          | Marcisz et al., 2017                                                                                  |
| Megali Limni            | 1            | 323.00        | 39.102000    | 26.321000     | lacustrine, drained lake       |                 | 1.48                          | Margari et al., 2007; Margari et al., 2009                                                            |
| Mela Swamp              | 1            | 20.00         | -9.470000    | 160.080000    | terrestrial, bog               | 0               |                               | Haberle, 1996                                                                                         |
| Micalong Swamp          | 1            | 1100.00       | -35.330000   | 148.510000    | terrestrial, bog               | -888888         | 1                             | Kemp and Hope, 2014; Kemp, 1993                                                                       |
| Middle Patriarch Swamp  | 1            | 19.00         | -39.990000   | 148.180000    | lacustrine, drained lake       | -888888         |                               | Ladd et al., 1992                                                                                     |
| Middle Rainbow Lake     | 1            | 3001.00       | 40.648000    | -106.624000   | lacustrine                     | 5.8             | 0.028                         | Calder et al., 2015                                                                                   |
| Migneint                | 1            | 440.00        | 52.820000    | -3.820000     | terrestrial, mire              | -888888         | 1.2                           | Ellis and Tallis, 2001                                                                                |
| Mildred                 | 1            | 334.00        | 56.930556    | -111.475000   | terrestrial, bog               | -888888         | -999999                       | Magnan et al., 2018                                                                                   |
| Mill Creek              | 1            | 4.00          | -33.400000   | 151.030000    | terrestrial                    | -777777         |                               | Devoy et al., 1994                                                                                    |
| Mindelsee               | 1            | 406.00        | 47.755550    | 9.023050      | lacustrine, glacial origin     | 14              | 0.99                          | Rösch et al., 2014; Rösch, 2013                                                                       |
| Minnesota Plateau Lake  | 1            | 827.00        | 62.541794    | -146.238431   | lacustrine                     | 5.4             | 0.05                          | Barrett et al., 2013                                                                                  |
| Minnreg Lake            | 1            | -999999.00    | 44.690500    | -93.319700    | lacustrine                     | -999999         | -999999                       | <a href="https://www.ncdc.noaa.gov/paleo/study/21071">https://www.ncdc.noaa.gov/paleo/study/21071</a> |

| Site name                         | Entities (#) | Elevation (m) | Latitude (°) | Longitude (°) | Site Type                   | Water depth (m) | Basin size (km <sup>2</sup> ) | Citation(s)                                                                                                                                                           |
|-----------------------------------|--------------|---------------|--------------|---------------|-----------------------------|-----------------|-------------------------------|-----------------------------------------------------------------------------------------------------------------------------------------------------------------------|
| Misask                            | 3            | 475.00        | 52.724800    | -72.212800    | terrestrial, fen            | -888888         | 0.102                         | Primeau and Garneau, 2021                                                                                                                                             |
| Mista                             | 1            | 372.00        | 50.805900    | -63.343200    | terrestrial, bog            | -888888         | 0.17                          | Primeau and Garneau, 2021                                                                                                                                             |
| Miticka slatina                   | 1            | 330.00        | 48.810000    | 18.108083     | terrestrial, bog            |                 | -999999                       | Jamrichová et al., 2018                                                                                                                                               |
| Mizorogaike Pond                  | 1            | 75.00         | 35.058300    | 135.769400    | terrestrial, mire           | -888888         | 0.09                          | Ogura, 2002; Sasaki and Takahara, 2011                                                                                                                                |
| Mlaka                             | 1            | 150.00        | 45.500000    | 15.121900     | terrestrial, marsh          | 0.1             | 0.07                          | Andrič, 2007; Feurdean et al., 2020b                                                                                                                                  |
| Mobutu Sese Seko Lake Albert      | 1            | 619.00        | 1.830000     | 31.160000     | lacustrine, tectonic origin | 46              | 5300                          | Beuning et al., 1997                                                                                                                                                  |
| Mogielica                         | 1            | 845.00        | 49.665906    | 20.279906     | terrestrial, buried fen     | -888888         | 0.00028                       | Czerwiński et al., 2020                                                                                                                                               |
| Mojiaoshan site 01                | 1            | -999999.00    | 30.400000    | 119.990000    | archaeological site         |                 | -999999                       | Wang et al., 2017                                                                                                                                                     |
| Mojiaoshan site 02                | 1            | -999999.00    | 30.400000    | 119.980000    | archaeological site         |                 | -999999                       | Wang et al., 2017                                                                                                                                                     |
| Molhasul Mare                     | 1            | 1124.00       | 46.590000    | 22.764200     | terrestrial, bog            |                 | 0.08                          | Feurdean and Willis, 2008; Feurdean et al., 2020b                                                                                                                     |
| Mongan Bog                        | 1            | 45.00         | 53.330000    | -7.930000     | terrestrial, bog            | -888888         | 6                             | Barber et al., 2003                                                                                                                                                   |
| Mont Valin                        | 1            | 356.00        | 48.610000    | -70.830000    | lacustrine                  | -777777         |                               | Couillard et al., 2013                                                                                                                                                |
| Montezuma Well                    | 1            | 1125.00       | 34.000000    | -112.000000   | lacustrine                  | 0               |                               | Davis and Shafer, 1992                                                                                                                                                |
| Moon Lake                         | 1            | 456.00        | 46.857601    | -98.158626    | lacustrine                  | 12.8            | 0.35                          | Clark et al., 1996                                                                                                                                                    |
| Moose                             | 1            | 1508.00       | 47.880000    | -123.350000   | lacustrine                  | 0               |                               | Gavin et al., 2001                                                                                                                                                    |
| Moreletta River                   | 1            | 417.00        | -28.820000   | 30.990000     | -777777                     | 0               |                               | Scott, 2002                                                                                                                                                           |
| Morro de Itapeva                  | 1            | 1850.00       | -22.780000   | -45.570000    | terrestrial, bog            | 0               |                               | Behling, 1997a                                                                                                                                                        |
| Morts                             | 1            | 14.00         | 50.263300    | -63.668300    | terrestrial, bog            | -888888         | -999999                       | Magnan et al., 2014                                                                                                                                                   |
| Morttjern                         | 1            | 227.00        | 59.059720    | 11.617770     | lacustrine                  | 12              | -999999                       | Birks et al., 2012                                                                                                                                                    |
| Mosaik                            | 2            | 300.00        | 51.985694    | -75.385440    | terrestrial, bog            | -888888         | 2.67                          | van Bellen et al., 2012                                                                                                                                               |
| Mosquito Hollow                   | 1            | 155.00        | 61.851867    | 37.770283     | terrestrial, small hollow   | -888888         | 0.001                         | Kuosmanen et al., 2014                                                                                                                                                |
| Motianling peatland               | 1            | 1645.00       | 47.370000    | 120.650000    | terrestrial, bog            |                 | 0.5                           | He et al., 2017                                                                                                                                                       |
| Mound G Pond Shiloh Indian Mounds | 1            | 143.00        | 35.140000    | -88.200000    | terrestrial, small hollow   | 0.48            |                               | Cridlebaugh, 1984; Delcourt and Delcourt, 1997a; Delcourt and Delcourt, 1997b; Delcourt and Delcourt, 1998; Delcourt et al., 1986; Delcourt et al., 1998; Meeks, 2005 |
| Mount Barr Cirque                 | 1            | 1376.00       | 49.260000    | -121.510000   | lacustrine                  | 9               | 0.02                          | Hallett et al., 2003                                                                                                                                                  |
| Mountain Lagoon                   | 1            | 604.00        | -33.500000   | 150.510000    | lacustrine                  | -777777         | -777777                       | Robbie, 1998                                                                                                                                                          |
| Mozgovitsa River                  | 1            | 1800.00       | 41.410000    | 23.110000     | terrestrial, bog            | -888888         | 7e-04                         | Marinova and Tonkov, 2012; Tonkov, 2003                                                                                                                               |
| Mt Constitution C11               | 1            | 611.00        | 48.659979    | -122.833612   | terrestrial, small hollow   | -888888         | -999999                       | Higuera et al., 2005; Sugimura et al., 2008                                                                                                                           |
| Mt Constitution C32               | 1            | 611.00        | 48.664006    | -122.838676   | terrestrial, small hollow   | -888888         | -999999                       | Higuera et al., 2005; Sugimura et al., 2008                                                                                                                           |
| Mt Constitution C38               | 1            | 735.00        | 48.676420    | -122.838074   | terrestrial, small hollow   | -888888         | -999999                       | Higuera et al., 2005; Sugimura et al., 2008                                                                                                                           |
| Mubwindi Swamp                    | 1            | 2100.00       | -1.080000    | 29.750000     | terrestrial, bog            | -888888         | -999999                       | Marchant et al., 1997                                                                                                                                                 |
| Muchang                           | 2            | 308.40        | 43.030000    | 122.200000    | terrestrial, marsh          | 0               |                               | Li et al., 2003; Zhang et al., 2004a                                                                                                                                  |
| Muellers Rock                     | 1            | 1102.00       | -35.390000   | 148.500000    | terrestrial, bog            | 0               |                               | Worthy, 2005                                                                                                                                                          |

| Site name                               | Entities (#) | Elevation (m) | Latitude (°) | Longitude (°) | Site Type                  | Water depth (m) | Basin size (km <sup>2</sup> ) | Citation(s)                                                                                                          |
|-----------------------------------------|--------------|---------------|--------------|---------------|----------------------------|-----------------|-------------------------------|----------------------------------------------------------------------------------------------------------------------|
| Mukhrino Mire                           | 1            | 35.00         | 60.888900    | 68.702600     | terrestrial, bog           |                 | 10                            | Lamentowicz et al., 2015                                                                                             |
| Mulloon Creek Swamp                     | 1            | 799.00        | -35.396667   | 149.585000    | terrestrial, fen           | -888888         | 0.14                          | Hope, Unpublished                                                                                                    |
| Mumbo Lake                              | 1            | 1860.00       | 41.191147    | -122.510445   | lacustrine                 | 3.2             | 0.04                          | Daniels et al., 2005                                                                                                 |
| Murphy Lake St Louis County             | 1            | 411.00        | 44.710500    | -93.341700    | lacustrine                 | 7.3             | 1.6                           | <a href="https://www.ncdc.noaa.gov/paleo/study/21072">https://www.ncdc.noaa.gov/paleo/study/21072</a>                |
| Mustei Nuur                             | 1            | 2353.00       | 51.239230    | 99.007560     | lacustrine                 | 28              | 0.34                          | <a href="http://www.ncdc.noaa.gov/paleo/study/20514">http://www.ncdc.noaa.gov/paleo/study/20514</a> ; Robinson, 2007 |
| Mustjarve                               | 1            | 38.90         | 59.076944    | 24.099722     | terrestrial, bog           | -888888         | 2.78                          | Veski, 1998                                                                                                          |
| MV01 (North Quebec)                     | 1            | 300.00        | 56.940000    | -74.900000    | lacustrine                 | 5.06            | 0.045                         | Gajewski, 2019                                                                                                       |
| Myrvatnet                               | 1            | 197.00        | 68.660550    | 16.381380     | lacustrine                 | 4.8             | -999999                       | Bjune et al., 2008                                                                                                   |
| Mythadi Sacred Grove                    | 1            | 879.00        | 12.220278    | 75.791944     | terrestrial, mire          | -888888         | -999999                       | Nogué et al., 2017                                                                                                   |
| Na Bahne                                | 1            | 240.00        | 50.198889    | 15.961389     | terrestrial, fen           | 1               | 0.01                          | Pokorný and van der Knaap, 2010; Pokorný et al., 2000                                                                |
| Na mahu                                 | 1            | 290.00        | 45.970000    | 14.538900     | lacustrine, drained lake   | -888888         | 160                           | Andrič et al., 2008; Feurdean et al., 2020b                                                                          |
| Naava hollow                            | 3            | 156.00        | 61.241389    | 25.056111     | terrestrial, small hollow  | -888888         | 3e-04                         | Stivirins et al., 2017a; Stivirins et al., 2019                                                                      |
| Nad Dolskym mlynem                      | 1            | 240.00        | 50.852500    | 14.338889     | terrestrial, bog           | -888888         | 5e-04                         | Abraham, 2006; Pokorný et al., 2008                                                                                  |
| Nadrau                                  | 1            | 680.00        | -17.750000   | 177.880000    | terrestrial, bog           | 0.5             | 1.5                           | Hope et al., 2009                                                                                                    |
| Nadym frozen mire north of West Siberia | 1            | 50.00         | 65.315600    | 72.874200     | terrestrial, mire          | -888888         | -999999                       | Blyakharchuk, Unpublished                                                                                            |
| Nakri                                   | 2            | 48.50         | 57.895119    | 26.273144     | lacustrine                 | 3.2             | 0.01                          | Amon et al., 2011                                                                                                    |
| Nam Co area                             | 1            | 4718.00       | 30.920000    | 90.880000     | terrestrial, mire          |                 | -999999                       | Herrmann et al., 2010                                                                                                |
| Nanwangcun                              | 1            | 10.00         | 37.000000    | 118.000000    | terrestrial                | -777777         |                               | Wang et al., 2003; Wang et al., 2004b                                                                                |
| Nar Lake                                | 1            | 1363.00       | 38.370000    | 34.450000     | lacustrine, volcanic lake  | 26              | 0.7                           | Turner et al., 2008                                                                                                  |
| Nataloup                                | 1            | 515.00        | 47.227500    | 4.035278      | terrestrial, bog           | -888888         | -999999                       | Jouffroy-Bapicot et al., 2013; Jouffroy-Bapicot, 2010                                                                |
| Native Companion Lagoon                 | 1            | 20.00         | -27.676040   | 153.410470    | lacustrine                 | 0.5             | -999999                       | Petherick et al., 2008                                                                                               |
| Navamuno                                | 1            | 1505.00       | 40.321300    | -5.778600     | terrestrial, bog           | -888888         | 0.14                          | López-Sáez et al., 2020                                                                                              |
| Navarres                                | 1            | 225.00        | 39.100000    | -0.683300     | terrestrial, bog           |                 | -999999                       | Carrion and Van Geel, 1999                                                                                           |
| Navatu                                  | 1            | 4.00          | -18.070000   | 178.530000    | terrestrial, bog           | 0.5             |                               | Hope et al., 2009                                                                                                    |
| NE Yellowstone National Park            | 1            | 2250.00       | 45.000000    | -110.000000   | other                      | -777777         |                               | Meyer et al., 1995                                                                                                   |
| Neihuang County                         | 1            | 57.00         | 35.730000    | 114.770000    | archaeological site        |                 | -999999                       | Liu, 2012                                                                                                            |
| Nekkeng                                 | 1            | 9.00          | 7.450000     | 134.520000    | terrestrial                | 0               |                               | Athens and Ward, 2005                                                                                                |
| Nelson Lake                             | 1            | 211.00        | 41.832780    | -88.380000    | lacustrine, glacial origin | 1.2             | 0.25                          | Nelson et al., 2006                                                                                                  |
| Neon                                    | 1            | 2875.00       | -8.470000    | 147.300000    | terrestrial, bog           | 0               |                               | Hope, 2009                                                                                                           |
| Neublans                                | 1            | 205.00        | 46.910000    | 5.340000      | terrestrial, fen           | -777777         |                               | Vannière et al., 2003; Vannière, 2001                                                                                |
| Neume                                   | 1            | 363.00        | 47.587800    | -77.110800    | lacustrine                 | 5.5             | 0.029                         | Carcaillet and Richard, 2000                                                                                         |
| Newall Creek                            | 1            | 140.00        | -42.070000   | 145.440000    | terrestrial, bog           | -888888         | -999999                       | van de Geer et al., 1989                                                                                             |
| Newnes Swamp                            | 1            | 1060.00       | -33.382500   | 150.222200    | terrestrial, mire          | -888888         | -999999                       | Chalson and Martin, 2009; Chalson, 1991                                                                              |

| Site name                   | Entities (#) | Elevation (m) | Latitude (°) | Longitude (°) | Site Type                 | Water depth (m) | Basin size (km <sup>2</sup> ) | Citation(s)                                         |
|-----------------------------|--------------|---------------|--------------|---------------|---------------------------|-----------------|-------------------------------|-----------------------------------------------------|
| Ngardmau                    | 1            | 10.00         | 7.600000     | 134.570000    | terrestrial               | 0               |                               | Athens and Ward, 2005                               |
| Ngerchau                    | 1            | 9.00          | 7.630000     | 134.520000    | terrestrial               | 0               |                               | Athens and Ward, 2005                               |
| Ngerdok                     | 1            | 25.00         | 7.520000     | 134.600000    | lacustrine                | 4.6             |                               | Athens and Ward, 2005                               |
| Ngerkell                    | 1            | 10.00         | 7.600000     | 134.620000    | terrestrial               | 0               |                               | Athens and Ward, 2005                               |
| Nicole Lake                 | 1            | 300.00        | 62.898592    | -114.806868   | lacustrine                | 5.6             | 0.08                          | Lynch et al., 2004                                  |
| Nihewan Basin               | 1            | 850.00        | 40.110000    | 114.450000    | fluvial                   |                 | 9000                          | Hu et al., 2015                                     |
| Niliq Lake                  | 1            | 270.00        | 67.867867    | -160.431633   | lacustrine                | 4.3             | -999999                       | Hu and Chipman, 2016; Hu and Chipman, Unpublished   |
| Ninisith Lake               | 5            | 225.00        | 59.580000    | -113.000000   | lacustrine                | 3.2             | 0.01                          | Larsen et al., 2000                                 |
| Noir (Quebec Ontario)       | 1            | 176.00        | 45.775000    | -75.133000    | lacustrine                | 16.2            | 0.1                           | Paquette and Gajewski, 2013                         |
| Noir Lake                   | 1            | -999999.00    | 66.002610    | -145.926130   | lacustrine                | 15.3            | -999999                       | Kelly et al., 2013                                  |
| Nong Pa Kho                 | 1            | 380.00        | 17.010000    | 102.930000    | terrestrial, fen          | 3.5             | -999999                       | Penny and Kealhofer, 2005                           |
| Noreikora Swamp             | 1            | 1750.00       | -6.330000    | 145.830000    | terrestrial, marsh        | 0               |                               | Haberle and Ledru, 2001                             |
| Noricka graba               | 1            | 240.00        | 46.620000    | 16.007500     | terrestrial, marsh        | -888888         | 0.001                         | Andrič and Willis, 2003; Feurdean et al., 2020b     |
| North Round Pond            | 1            | 317.00        | 42.847600    | -72.451900    | lacustrine                | 3.4             | 0.043                         | Francis and Foster, 2001; Kdster and Pienitz, 2006a |
| North Torbreck              | 1            | 564.00        | -37.480000   | 146.940000    | fluvial                   | 0               |                               | McKenzie, 2002                                      |
| Northwest Crater Tower Hill | 1            | 20.00         | -38.310000   | 142.360000    | lacustrine, volcanic lake | 0.36            | -999999                       | D'Costa et al., 1989                                |
| Northwest Lake              | 1            | 331.00        | 52.500000    | -92.500000    | lacustrine                | 8.1             | 0.1                           | Lynch et al., 2004                                  |
| Notts Swamp                 | 1            | 682.00        | -33.809840   | 150.407700    | terrestrial, mire         | -888888         | -999999                       | Chalson and Martin, 2009; Chalson, 1991             |
| Novoalexandrovskoye         | 1            | 113.00        | 55.120000    | 41.040000     | terrestrial, bog          |                 | 0.17                          | Feurdean et al., 2020b; Novenko et al., 2016b       |
| Nursery Swamp               | 1            | 1092.00       | -35.675567   | 148.967200    | terrestrial, bog          | -888888         | 0.26                          | Rogers and Hope, 2006                               |
| Nussbaumersee               | 1            | 450.00        | 47.600000    | 8.810000      | lacustrine                | 0               |                               | Haas and Hadorn, 1998                               |
| NW 1                        | 1            | 120.00        | 61.845917    | -122.400000   | terrestrial, bog          | -888888         | -999999                       | Väliranta and Piilo, Unpublished                    |
| O14                         | 1            | 332.00        | 50.028333    | -94.824444    | lacustrine                | 8.3             | 0.07                          | Waito et al., 2018                                  |
| O15                         | 1            | 339.00        | 50.008056    | -94.982500    | lacustrine                | 3.9             | 0.062                         | Waito et al., 2018                                  |
| O4                          | 1            | 366.00        | 49.757500    | -94.877778    | lacustrine                | 7.2             | 0.146                         | Waito et al., 2018                                  |
| O6                          | 1            | 361.00        | 49.821389    | -94.783611    | lacustrine                | 3.3             | 0.063                         | Waito et al., 2018                                  |
| Oaks Creek                  | 1            | 610.00        | -37.580000   | 146.160000    | terrestrial, bog          | 0               |                               | McKenzie, 2002                                      |
| Oberderdingen-Grossvillars  | 2            | 207.00        | 49.042500    | 8.760278      | terrestrial, fen          | -888888         | -999999                       | Rösch, 2005                                         |
| Odersprungmoor              | 1            | 811.00        | 51.771389    | 10.567778     | terrestrial, fen          | -888888         | -999999                       | Galka et al., 2019                                  |
| Odessa Lake                 | 1            | 3051.00       | 40.330367    | -105.685400   | lacustrine                | 6.9             | 0.033                         | Higuera et al., 2014                                |
| ODP Site 820                | 1            | -280.00       | -16.630000   | 146.300000    | marine                    | -888888         | -888888                       | Moss and Kershaw, 2000                              |
| ODP-1144                    | 1            | -2037.00      | 20.050000    | 117.410000    | marine                    | 2037            | -888888                       | Luo et al., 2001                                    |
| ODP-668B                    | 1            | -3965.00      | -20.920000   | 4.770000      | marine                    | 2693            |                               | Bird and Cali, 2002                                 |
| ODP1078C                    | 1            | -426.00       | -11.910000   | 13.400000     | marine                    | -888888         | -888888                       | Dupont et al., 2008                                 |
| ODP893A                     | 1            | -577.00       | 34.280000    | -120.030000   | marine                    |                 |                               | Heusser, 1998; Heusser, 2000; Heusser, Unpublished  |
| Ofuke                       | 1            | 510.00        | 38.640000    | 135.170000    | terrestrial, bog          | -888888         | -999999                       | Miyoshi and Takahara, Unpublished                   |
| Ojos del Tremendal          | 1            | 1650.00       | 40.541700    | -2.045000     | terrestrial, bog          | -888888         | 0.6                           | Stevenson, 2000                                     |
| OK Lake                     | 1            | 108.00        | 54.800000    | -95.250000    | lacustrine                | 16.4            | 0.1                           | Lynch et al., 2004                                  |

| Site name                       | Entities (#) | Elevation (m) | Latitude (°) | Longitude (°) | Site Type                  | Water depth (m) | Basin size (km <sup>2</sup> ) | Citation(s)                                                                |
|---------------------------------|--------------|---------------|--------------|---------------|----------------------------|-----------------|-------------------------------|----------------------------------------------------------------------------|
| Okame-ike Swamp                 | 1            | 712.00        | 34.480000    | 135.930000    | terrestrial, mire          | 1               | 0.024                         | Inoue et al., 2012                                                         |
| Okarito Pakihi                  | 1            | 70.00         | -43.241700   | 170.216700    | terrestrial, bog           | -888888         | -999999                       | Newnham et al., 2007b; Vandergoes et al., 2005                             |
| Okna                            | 1            | 277.00        | 50.532070    | 14.675930     | terrestrial, fen           | -888888         | 0.12                          | Bobek et al., 2019                                                         |
| Olbed                           | 1            | 20.00         | 7.500000     | 134.540000    | terrestrial                | 0               |                               | Athens and Ward, 2005                                                      |
| Old Lake Coomboo Depression     | 1            | 86.40         | -25.230500   | 153.179900    | lacustrine                 | -777777         | -999999                       | Longmore and Heijnis, 1999; Longmore, 1997                                 |
| Olga Hollow                     | 1            | 200.00        | 61.201600    | 37.590500     | terrestrial, small hollow  | -888888         | 0.001                         | Kuosmanen et al., 2014                                                     |
| Oops                            | 1            | 488.00        | 65.440000    | -147.630000   | lacustrine                 | -777777         |                               | Finney and Krumhardt, 2004                                                 |
| Ortino river basin              | 4            | NA            | 68.000000    | 54.000000     | terrestrial, bog           | 0               | -999999                       | Väliranta et al., 2003                                                     |
| Otter Pond                      | 1            | 107.00        | 42.650000    | -72.530000    | lacustrine                 | 2.6             | 0.031                         | Fuller et al., 1998; Parshall and Foster, 2002                             |
| Ours                            | 2            | 458.00        | 54.049780    | -72.454060    | terrestrial, fen           | -888888         | 0.01                          | van Bellen et al., 2013                                                    |
| Oygartjonn                      | 1            | 665.00        | 59.625830    | 7.986660      | lacustrine                 | 12.5            | -999999                       | Birks, 2006                                                                |
| Pancavska louka                 | 1            | 1336.00       | 50.766389    | 15.541111     | terrestrial, bog           | -888888         | 0.28                          |                                                                            |
| Panggu Town                     | 1            | 495.00        | 52.550000    | 123.740000    | terrestrial, mire          |                 | -999999                       | Zhao and Li, 2012                                                          |
| Panther Potholes                | 1            | 1100.00       | 48.650000    | -121.033300   | lacustrine                 | 5               | 0.004                         | Prichard et al., 2009                                                      |
| Paoay Lake                      | 2            | 15.00         | 18.200000    | 120.540000    | lacustrine                 | 4               |                               | Stevenson et al., 2009                                                     |
| Paradox Lake                    | 1            | 68.00         | 60.623074    | -150.757767   | lacustrine                 | 15.8            | 0.12                          | Anderson et al., 2006                                                      |
| Parika                          | 1            | 48.50         | 58.490278    | 25.774167     | terrestrial, bog           | -888888         | 34.26                         | Niinemets et al., 2002                                                     |
| Parizske Mire                   | 2            | 123.00        | 47.870000    | 18.465300     | terrestrial, bog           |                 | -999999                       | Jamrichová et al., 2014; Jamrichová et al., 2017                           |
| Park Pond 1                     | 1            | 2705.00       | 43.468056    | -109.959444   | lacustrine                 | 0.5             | -999999                       | Lynch, 1998                                                                |
| Park Pond 2                     | 1            | 2714.00       | 43.450000    | -109.940000   | lacustrine                 | 0.5             | -999999                       | Lynch, 1998                                                                |
| Park Pond 3                     | 1            | 2739.00       | 43.450000    | -109.920000   | lacustrine                 | 0.5             | -999999                       | Lynch, 1998                                                                |
| Parker Lake                     | 1            | 276.00        | -12.140000   | -69.020000    | lacustrine                 | 2               | 0.33                          | Bush et al., 2007b                                                         |
| Pas-de-Fond                     | 1            | 290.00        | 48.808300    | -78.808300    | lacustrine, glacial origin | 11              | 0.02                          | Carcaillet et al., 2001; Carcaillet et al., 2002; Carcaillet et al., 2006  |
| Path (Nova Scotia)              | 1            | 15.00         | 45.869000    | 63.077000     | lacustrine                 | 7               | 0.219                         | Neil et al., 2014                                                          |
| Patterson Lake Warner Mountains | 1            | 2743.00       | 41.386700    | -120.223600   | lacustrine, glacial origin | -999999         | 0.12                          | Minckley et al., 2007                                                      |
| Pechora                         | 1            | 127.00        | 62.000000    | 52.000000     | terrestrial, bog           | -777777         |                               | Väliranta et al., 2003                                                     |
| Pecker Pond                     | 1            | 370.00        | 42.713300    | -71.965000    | lacustrine                 | 4.8             | 0.165                         | Francis and Foster, 2001                                                   |
| Pemerak Swamp                   | 1            | 40.00         | 0.780000     | 112.050000    | terrestrial, bog           | -888888         | -999999                       | Anshari et al., 2001                                                       |
| Pena da Cadela                  | 1            | 970.00        | 42.830000    | -7.170000     | terrestrial, bog           | -888888         | 0.005                         | Martínez Cortizas et al., 2002                                             |
| Pena Negra                      | 1            | 1000.00       | 40.334700    | -5.792200     | terrestrial, bog           | -888888         | -999999                       | Abel-Schaad and López-Sáez, 2012                                           |
| Penningholmen Lake Uddjaure     | 1            | 425.00        | 66.030000    | 17.430000     | terrestrial, soil          | -888888         | -999999                       | Bradshaw and Zackrisson, 1990                                              |
| Penrith Lakes                   | 1            | 18.00         | -33.710000   | 150.670000    | lacustrine                 | -777777         | -777777                       | Chalson, 1991                                                              |
| Perch Lake                      | 1            | 400.00        | 68.941494    | -150.499372   | lacustrine                 | 12.6            | 0.14                          | Chipman et al., 2015                                                       |
| Petit Lac Bouchard              | 1            | 145.00        | 48.853900    | -64.597800    | lacustrine                 | 1.5             | 0.02                          | Asnong and Richard, 2003; Carcaillet et al., 2002; Carcaillet et al., 2006 |
| Petresiunai                     | 1            | 107.00        | 55.850000    | 25.702800     | lacustrine                 | 5               | 0.02                          | Stančikaitė et al., 2019b                                                  |
| Peyre                           | 1            | 1100.00       | 44.960000    | 2.710000      | terrestrial, mire          | -777777         |                               | Miras et al., 2006b                                                        |
| Pian di Gembro                  | 1            | 1350.00       | 46.160000    | 10.150000     | terrestrial, fen           | -888888         | 0.625                         | Pini, 2002                                                                 |
| Pian Segna                      | 1            | 1162.00       | 46.180000    | 8.630000      | terrestrial, bog           | 0               |                               | Valsecchi, 2005                                                            |
| Piano                           | 1            | 1439.00       | 46.320000    | 8.620000      | terrestrial, bog           |                 | 0.002                         | Valsecchi and Tinner, 2010; Valsecchi et al., 2010                         |

| Site name             | Entities (#) | Elevation (m) | Latitude (°) | Longitude (°) | Site Type                  | Water depth (m) | Basin size (km <sup>2</sup> ) | Citation(s)                                                                  |
|-----------------------|--------------|---------------|--------------|---------------|----------------------------|-----------------|-------------------------------|------------------------------------------------------------------------------|
| Picea Lake            | 1            | 269.00        | 65.881620    | -145.587680   | lacustrine                 | 7.3             | -999999                       | Kelly et al., 2013                                                           |
| Piermont Marsh        | 1            | 29.00         | 41.000000    | -73.916700    | terrestrial, marsh         |                 | 1.1                           | Pederson et al., 2005                                                        |
| Pimenta Bueno         | 1            | 229.00        | -11.816600   | -61.166600    | terrestrial, soil          | 0               |                               | Ruiz Pessenda et al., 1998                                                   |
| Pine Camp             | 1            | 21.40         | -34.750000   | 141.130000    | lacustrine, playa          | 0.2             | 0.5                           | Cupper, 2005; Cupper, 2006                                                   |
| Pine hollow           | 3            | 155.00        | 61.870278    | 37.993611     | terrestrial, small hollow  | -888888         | 1e-06                         | Stivrins, Unpublished                                                        |
| Pintlar               | 1            | 1921.00       | 45.840000    | -113.440000   | lacustrine                 | 0               |                               | Brunelle et al., 2005; Brunelle-Daines, 2002                                 |
| Piston Core RC24-07   | 1            | -3899.00      | -11.910000   | 1.350000      | marine                     | 3899            |                               | Verardo and Ruddiman, 1996                                                   |
| Pixie Lake            | 1            | 70.00         | 48.595187    | -124.197301   | lacustrine, glacial origin | -999999         | 0.053                         | Brown and Hebda, 2002; Brown et al., 2006                                    |
| Pla de l'Orri         | 1            | 2100.00       | 42.500000    | 1.880000      | terrestrial, mire          | 0               |                               | Vannière et al., 2001; Vannière, 2001                                        |
| Plaani                | 1            | 244.10        | 57.676944    | 27.077222     | lacustrine                 | 4.4             | 0.24                          | Niinemets and Saarse, 2007b                                                  |
| Plaine                | 1            | 34.00         | 50.275000    | -63.538300    | terrestrial, bog           | -888888         | -999999                       | Magnan et al., 2014                                                          |
| Plan Bouchet          | 1            | 2405.00       | 45.240000    | 6.560000      | terrestrial, bog           | -777777         |                               | Carcaillet et al., 2009; Genries et al., 2009b                               |
| Plotnikovo Mire       | 1            | 120.00        | 56.835520    | 83.284014     | terrestrial, bog           |                 | -999999                       | Feurdean et al., 2019a; Feurdean et al., 2020a                               |
| Plum Swamp            | 1            | 40.00         | -22.260000   | 166.610000    | terrestrial, bog           | 0               |                               | Stevenson, 1998                                                              |
| Poets Hill            | 1            | 600.00        | -41.880000   | 145.550000    | lacustrine, glacial origin | 0               |                               | Colhoun, 1992                                                                |
| Poiana Stiol          | 1            | 1520.00       | 47.590000    | 24.811900     | terrestrial, bog           | -888888         | 0.006                         | Feurdean et al., 2017a; Feurdean et al., 2020b                               |
| Poktovik Lake         | 2            | 160.00        | 68.031778    | -161.374722   | lacustrine                 | 13.4            | 0.063                         | Higuera et al., 2011                                                         |
| Poley Creek           | 1            | 630.00        | -37.400000   | 145.210000    | terrestrial, mire          | -888888         | -777777                       | Pittock, 1989                                                                |
| Polomovy dul          | 1            | 313.00        | 50.882869    | 14.317496     | terrestrial, bog           | -888888         | 5e-04                         | Bobek et al., 2019                                                           |
| Poittiais hollow      | 3            | 140.00        | 62.275833    | 36.750833     | terrestrial, small hollow  | -888888         | 1e-06                         | Stivrins et al., 2017a; Stivrins et al., 2019                                |
| Pontes e Lacerda      | 1            | 260.00        | -15.260000   | -59.210000    | terrestrial, soil          | 0               |                               | Marques Gouveia et al., 2002                                                 |
| Porphyry              | 1            | 1100.00       | 48.900916    | -123.835013   | lacustrine                 | -999999         | 0.0035                        | Brown and Hebda, 2003                                                        |
| Portage Lake          | 1            | 75.00         | 60.716667    | -150.533300   | lacustrine                 | 15.6            | 0.116                         | Lynch et al., 2002                                                           |
| Porter Lake           | 1            | 73.00         | 44.440000    | -123.240000   | lacustrine                 | 3               | 0.014                         | Walsh et al., 2010b                                                          |
| Porto Velho           | 1            | 90.00         | -8.350000    | -63.950000    | terrestrial, soil          | -888888         | -888888                       | de Freitas et al., 2001                                                      |
| Poselsky rybník       | 1            | 274.00        | 50.544398    | 14.675370     | terrestrial, fen           | -888888         | 0.085                         | Bobek et al., 2019                                                           |
| Posy Lake             | 1            | 2653.00       | 37.950000    | -111.700000   | lacustrine                 | -999999         | -999999                       | Shafer, 1989                                                                 |
| Potrok Aike           | 2            | 100.00        | -51.960000   | -70.380000    | lacustrine, volcanic lake  | 100             | 9.46                          | Haberzettl et al., 2005; Haberzettl et al., 2006                             |
| Pout Pond             | 1            | 232.00        | 43.420000    | -71.500000    | lacustrine                 | -777777         |                               | Clark and Hussey, 1996                                                       |
| Powelltown            | 1            | 168.00        | -37.860000   | 145.700000    | terrestrial, bog           | 0               |                               | McKenzie, 2002                                                               |
| Pozo de la Nieve      | 1            | 1600.00       | 40.353200    | -4.551600     | terrestrial, bog           | -888888         | 0.0381                        | Robles-López et al., 2017                                                    |
| Prapoce               | 1            | 480.00        | 45.420000    | 14.122300     | terrestrial, marsh         | -888888         | 0.28                          | Andrič and Willis, 2003; Andrič, 2004; Andrič, 2006b; Feurdean et al., 2020b |
| Prasilske Jezero      | 1            | 1079.00       | 49.060000    | 13.400000     | lacustrine                 | 14.8            | 0.037                         | Carter et al., 2018                                                          |
| Pravcicky dul         | 1            | 382.00        | 50.884236    | 14.296834     | terrestrial, bog           | -888888         | 1e-04                         | Bobek et al., 2019                                                           |
| Profond Lake          | 1            | 270.00        | 49.861139    | -78.613306    | lacustrine                 | 20              | 0.006                         | Ali et al., 2009                                                             |
| Pryskyrichny dul      | 1            | 423.00        | 50.887778    | 14.413333     | terrestrial, bog           | -888888         | 0.002                         | Abraham and 'y, 2008; Kuneš et al., 2007                                     |
| Puerto de Serranillos | 2            | 1700.00       | 40.307200    | -4.934200     | terrestrial, bog           | -888888         | 0.024                         | López-Sáez et al., 2017b                                                     |

| Site name              | Entities (#) | Elevation (m) | Latitude (°) | Longitude (°) | Site Type                  | Water depth (m) | Basin size (km <sup>2</sup> ) | Citation(s)                                                                |
|------------------------|--------------|---------------|--------------|---------------|----------------------------|-----------------|-------------------------------|----------------------------------------------------------------------------|
| Puerto del Hambre      | 1            | 6.25          | -53.600000   | -70.910000    | terrestrial, bog           | -888888         | -999999                       | McCulloch and Davies, 2001                                                 |
| Puerto del Pico        | 2            | 1395.00       | 40.323300    | -5.014500     | terrestrial, bog           | -888888         | 2e-04                         | López-Sáez et al., 2016b                                                   |
| Puerto Haberton        | 1            | 20.00         | -54.880000   | -67.160000    | terrestrial, bog           | -777777         |                               | Heusser, 1990b                                                             |
| Puerto Octay           | 4            | 120.00        | -40.933333   | -72.900000    | terrestrial, bog           |                 | -999999                       | Moreno, 1993                                                               |
| Puklina                | 1            | 386.00        | 50.932394    | 14.439768     | terrestrial, small hollow  | -888888         | 1e-04                         | Bobek et al., 2019                                                         |
| Punta Arenas           | 1            | 75.00         | -53.150000   | -70.950000    | terrestrial, mire          | -888888         | 0.5                           | Heusser, 1995                                                              |
| Putaanlampi            | 1            | 230.00        | 66.380000    | 29.410000     | lacustrine                 | 1               | 0.01                          | Sarmaja-Korjonen, 1998                                                     |
| Qiaocun village        | 1            | -999999.00    | 35.100000    | 107.500000    | archaeological site        |                 | -999999                       | Zhou et al., 2011                                                          |
| Qindeli peat           | 1            | 74.00         | 47.920000    | 133.220000    | terrestrial, mire          | 80              |                               | Li et al., 2005                                                            |
| Qinghai Lake           | 2            | 1885.00       | 25.130000    | 98.570000     | lacustrine, volcanic lake  | 6.3             | 0.25                          | Xiao et al., 2017                                                          |
| Qishan County          | 1            | 608.00        | 32.430000    | 107.750000    | archaeological site        |                 | -999999                       | Tan et al., 2010                                                           |
| Quambie Lagoon         | 3            | 20.00         | -12.500000   | 131.170000    | lacustrine                 | 1               |                               | Stevenson, Unpublished                                                     |
| Quart du Bois          | 1            | 420.00        | 46.892500    | 4.034167      | terrestrial, bog           | -888888         | -999999                       | Jouffroy-Bapicot et al., 2013; Jouffroy-Bapicot, 2010                      |
| Queens Swamp           | 1            | 665.00        | -33.900000   | 150.590000    | terrestrial, fen           | 0               |                               | Mooney, Unpublished                                                        |
| Quilichao              | 1            | 1020.00       | 3.100000     | -76.510000    | lacustrine                 | -999999         | 3                             | Berrio et al., 2002                                                        |
| Quoyloo Meadow         | 2            | 33.00         | 59.060000    | -3.310000     | terrestrial, mire          |                 | 0.18                          | Abrook et al., 2020; Bunting, 1994; Timms et al., 2017; Timms et al., 2019 |
| Rabadilla de Vaca mire | 1            | 2590.00       | -3.974667    | -79.117611    | terrestrial, bog           |                 | 0.6                           | Rodriguez and Behling, 2010                                                |
| Radisson               | 1            | 174.00        | 53.724400    | -77.703100    | terrestrial, bog           | -888888         | -888888                       | Magnan et al., 2012                                                        |
| Raigejebbe Arjeplog    | 1            | 480.00        | 66.156944    | 18.213333     | lacustrine, glacial origin | 5.1             | 0.004                         | Carcaillet et al., 2007                                                    |
| Rainbow Lake A         | 1            | 225.00        | 59.800000    | -112.160000   | lacustrine                 | 10              | 0.027                         | Larsen and MacDonald, 1998; Larsen et al., 2000; Larsen, 1994              |
| Rajus                  | 1            | 824.00        | 12.178611    | 75.817500     | terrestrial, mire          | -888888         | -999999                       | Nogué et al., 2017                                                         |
| Raseliniste Jizery     | 1            | 843.00        | 50.861706    | 15.301881     | terrestrial, bog           | -888888         | 0.03                          | Bobek et al., 2019                                                         |
| Rasna                  | 1            | 679.00        | 49.227306    | 15.374528     | terrestrial, bog           |                 | -999999                       | Szabó et al., 2017                                                         |
| Ratasjoen              | 1            | 1169.00       | 62.266660    | 9.833330      | lacustrine, glacial origin | 8.3             | 0.125                         | Velle et al., 2005                                                         |
| Raven Lake             | 1            | 118.00        | 68.009028    | -162.035694   | lacustrine                 | 4.9             | 0.057                         | Higuera et al., 2011                                                       |
| Rawa Danau             | 1            | 100.00        | -6.183300    | 105.966700    | lacustrine                 | 1               | 25                            | Haberle and Ledru, 2001; van der Kaars et al., 2001                        |
| Raynald Lake           | 1            | 250.00        | 49.809278    | -78.535833    | lacustrine                 | 10.3            | 0.015                         | Ali et al., 2009                                                           |
| Red Lake Kobuk Valley  | 1            | -999999.00    | 68.081317    | -162.121617   | lacustrine                 | 8.2             | 0.03                          | Higuera, Unpublished; Hu, 2015                                             |
| Redhead Lagoon         | 1            | 65.00         | -32.990000   | 151.720000    | lacustrine                 | 2               | -777777                       | Williams, 2005                                                             |
| Reiarsdalsvatn         | 1            | 245.00        | 58.326380    | 7.785830      | lacustrine                 | 9.2             | -999999                       | Birks, 2006                                                                |
| Reidh-lochan           | 1            | 160.00        | 58.030000    | -4.120000     | lacustrine, glacial origin | 4.57            | 0.008                         | Froyd, 2006                                                                |
| Rennix Gap             | 1            | 1570.00       | -36.220000   | 148.300000    | terrestrial                | 0               |                               | Hope, Unpublished                                                          |
| Rentukka Hollow        | 1            | 150.00        | 61.192300    | 25.152600     | terrestrial, small hollow  | -888888         | 0.001                         | Kuosmanen et al., 2016                                                     |



| Site name                    | Entities (#) | Elevation (m) | Latitude (°) | Longitude (°) | Site Type                  | Water depth (m) | Basin size (km <sup>2</sup> ) | Citation(s)                                  |
|------------------------------|--------------|---------------|--------------|---------------|----------------------------|-----------------|-------------------------------|----------------------------------------------|
| Reservoir                    | 1            | 2161.00       | 45.130000    | -113.460000   | lacustrine                 | -777777         |                               | Clark et al., 2001                           |
| Resnikov prekop              | 2            | 290.00        | 45.970000    | 14.540000     | archaeological site        | -888888         | -999999                       | Andrič, 2006a                                |
| Reunion Lake                 | 1            | 306.00        | 66.009250    | -146.107800   | lacustrine                 | 7.7             | -999999                       | Kelly et al., 2013                           |
| Rice Lake Ward county        | 1            | 620.00        | 48.009420    | -101.539720   | lacustrine                 | 10              | 0.75                          | Umbanhowar Jr, 2004                          |
| Richard Lake                 | 1            | 432.00        | 50.619417    | -74.686083    | lacustrine                 | 5.3             | 0.04                          | Ali et al., 2012; El-Guellab et al., 2015    |
| Rietvlei Dam                 | 1            | 112.00        | -29.820000   | 30.990000     | -777777                    | 0               |                               | Scott and Vogel, 1983                        |
| Rifugio Mondovi              | 1            | 1760.00       | 44.183333    | 7.733333      | terrestrial, bog           | -888888         | -999999                       | Ortu et al., 2003; Ortu et al., 2008         |
| Ringarooma River             | 4            | 885.00        | -41.300000   | 147.610000    | terrestrial                | 0               |                               | Dodson et al., 1998                          |
| Rio Curua                    | 1            | 3.00          | -1.730000    | -51.450000    | fluvial                    | 5               | -999999                       | Behling and da Costa, 2000                   |
| Rio Rubens Bog               | 1            | 220.00        | -52.137500   | -71.881389    | terrestrial, bog           | -888888         | 0.25                          | Huber and Markgraf, 2003; Huber et al., 2004 |
| Robinson Lake                | 1            | -999999.00    | 65.971580    | -145.699250   | lacustrine                 | 8.1             | -999999                       | Kelly et al., 2013                           |
| Rock Arch Swamp              | 1            | 575.00        | -34.300000   | 150.390000    | terrestrial, fen           | 0.1             |                               | Hope and Macphail, 2005                      |
| Rock Lake                    | 1            | 285.00        | 60.416667    | -150.250000   | lacustrine                 | 5.3             | 0.03                          | Lynch et al., 2002                           |
| Rockslide Lake               | 1            | 1539.00       | 49.550849    | -117.520880   | lacustrine                 | 14.1            | 0.032                         | Gavin et al., 2006                           |
| Rojkov                       | 1            | 472.00        | 49.150000    | 19.155000     | terrestrial, bog           | -888888         | -999999                       | Jamrichová, Unpublished                      |
| Romaine                      | 1            | 24.00         | 50.294700    | -63.715700    | terrestrial, bog           | -888888         | -999999                       | Magnan et al., 2014                          |
| Romoty                       | 1            | 119.00        | 53.800000    | 22.632800     | lacustrine, drained lake   |                 | 13.36                         | Mirosław-Grabowska et al., 2015              |
| Rotten Swamp                 | 2            | 1445.00       | -35.700000   | 148.883300    | terrestrial, fen           | -888888         | 0.28                          | Clark, 1986; Hope and Clark, 2008            |
| Rouge-Tougjarv               | 1            | 109.00        | 57.738889    | 26.905000     | lacustrine                 | 17              | 0.044                         | Veski et al., 2005                           |
| Round Lake Mount Zirkel      | 1            | 3071.00       | 40.473000    | -106.663000   | lacustrine                 | 11.83           | 0.062                         | Calder et al., 2015                          |
| Round Pond                   | 1            | 548.00        | 44.000000    | -74.000000    | lacustrine                 | -777777         |                               | Clark et al., 2001                           |
| Round Pond Truro             | 1            | 4.00          | 41.971000    | -70.011000    | lacustrine                 | 7.5             | 0.016                         | Oswald et al., 2020; Parshall et al., 2003   |
| Ruby Lake (COHMAP2k)         | 1            | 330.00        | 45.266667    | -91.450000    | lacustrine                 | 3               | 0.129                         | Gajewski et al., 1985                        |
| Rue des Boîteux–Rue d'Argent | 1            | 17.00         | 50.850000    | 4.350000      | terrestrial, bog           | -888888         | -999999                       | Marinova et al., 2021                        |
| Ruila                        | 2            | 43.80         | 59.175833    | 24.429722     | lacustrine                 | 0.9             | 0.46                          | Poska and Saarse, 2002a                      |
| Rumuiku Swamp                | 1            | 2154.00       | -0.185800    | 37.919300     | lacustrine                 | 0.5             | 0.018                         | Rucina et al., 2009                          |
| Ruppert Lake                 | 1            | 230.00        | 67.071111    | -154.245833   | lacustrine, glacial origin | -999999         | 0.03                          | Higuera et al., 2009                         |
| Rusaka Swamp                 | 1            | 2070.00       | -3.430000    | 29.610000     | terrestrial, bog           | -888888         | -999999                       | Bonnefille et al., 1995                      |
| Ryans Swamp                  | 1            | 8.00          | -35.090000   | 150.390000    | terrestrial, bog           | 1               |                               | Radclyffe, 1993                              |
| Rynholec                     | 1            | 478.00        | 50.129444    | 13.929722     | terrestrial, bog           | 1               | 0.03                          | Pokorný, 2005                                |
| Sacramento Mountains         | 1            | 2400.00       | 32.840000    | -105.700000   | terrestrial, soil          | 0               |                               | Frechette, 2007; New, 2007                   |
| Sacred Lake                  | 1            | 2350.00       | 0.040000     | 37.520000     | lacustrine                 | 5               | 0.51                          | Wooller et al., 2000                         |
| Sagistalsee                  | 1            | 1953.00       | 46.680000    | 7.980000      | -777777                    |                 |                               | Wick et al., 2003b                           |
| Saint Louis Lac              | 1            | 3.00          | -22.230000   | 166.550000    | terrestrial, bog           | -999999         | -999999                       | Stevenson, 2004                              |
| Sakhare                      | 1            | 800.00        | 41.580000    | 45.310000     | lacustrine, playa          | 0.5             | 0.1                           | Connor, 2006                                 |

| Site name                            | Entities (#) | Elevation (m) | Latitude (°) | Longitude (°) | Site Type                  | Water depth (m) | Basin size (km <sup>2</sup> ) | Citation(s)                                                                                                          |
|--------------------------------------|--------------|---------------|--------------|---------------|----------------------------|-----------------|-------------------------------|----------------------------------------------------------------------------------------------------------------------|
| Salitre                              | 1            | 970.00        | -19.000000   | -46.760000    | terrestrial, soil          | 0               |                               | Ruiz Pessenda et al., 2001; Ruiz Pessenda et al., 2004                                                               |
| Salmo Lake                           | 2            | 866.00        | 60.445555    | -133.561389   | lacustrine                 | 8               | -999999                       | Edwards et al., 2015                                                                                                 |
| San Joaquin Marsh                    | 1            | 2.00          | 33.650000    | -117.850000   | lacustrine                 | -999999         | -999999                       | Davis, 1992                                                                                                          |
| Sand Beach Lake                      | 1            | 3140.00       | 40.218767    | -105.601800   | lacustrine                 | 9.3             | 0.049                         | Higuera et al., 2014                                                                                                 |
| Sands of Time                        | 1            | 256.00        | 66.028500    | -147.549000   | lacustrine                 | 10              | 0.7                           | Edwards, Unpublished                                                                                                 |
| Sandy Hill Pond                      | 1            | 16.00         | 41.689600    | -70.364800    | lacustrine                 | 3               | 0.024                         | Oswald et al., 2020; Parshall et al., 2003                                                                           |
| Sanger Lake CA                       | 1            | 1547.00       | 41.900000    | -123.640000   | lacustrine                 | 7.19            |                               | Briles et al., 2008                                                                                                  |
| Sanjiang Plain HE                    | 1            | 71.00         | 47.580000    | 133.500000    | terrestrial, bog           | 0.5             | -999999                       | Zhang et al., 2015                                                                                                   |
| Sanjin Nuur                          | 1            | 2250.00       | 51.231830    | 99.023280     | lacustrine                 | 17.4            | 0.08                          | <a href="http://www.ncdc.noaa.gov/paleo/study/20515">http://www.ncdc.noaa.gov/paleo/study/20515</a> ; Robinson, 2007 |
| Santa Maria                          | 1            | 17.00         | -1.570000    | -53.600000    | lacustrine                 | 0               |                               | Bush et al., 2007a                                                                                                   |
| Sao Francisco de Assis               | 1            | 100.00        | -29.580000   | -55.210000    | terrestrial, mire          | 0               |                               | Behling et al., 2005                                                                                                 |
| Sapphire Swamp                       | 1            | 1260.00       | -30.030000   | 151.560000    | terrestrial, bog           | 0               |                               | Dodson et al., 1986                                                                                                  |
| Saquinho                             | 1            | 480.00        | -10.400000   | -43.210000    | terrestrial, fen           | -999999         | -999999                       | de Oliveira et al., 1999                                                                                             |
| Saracuri                             | 1            | 18.00         | -1.670000    | -53.570000    | lacustrine, fluvial origin | 0               | -999999                       | Bush et al., 2007a                                                                                                   |
| Sari                                 | 1            | 67.00         | -16.630000   | 179.500000    | terrestrial, bog           | 0.5             |                               | Hope et al., 2009                                                                                                    |
| Sarup So                             | 1            | -888888.00    | 55.200000    | 10.060000     | lacustrine                 | 4.1             | 0.036                         | Bjerring et al., 2012                                                                                                |
| Savkarrs mosse                       | 1            | 65.00         | 59.160000    | 18.300000     | terrestrial, bog           | -888888         | 0.05                          | von Stedingk, 1999                                                                                                   |
| Sayram Lake                          | 1            | 2071.90       | 44.580000    | 81.150000     | lacustrine                 | 86              | 453                           | Jiang et al., 2012                                                                                                   |
| Scotty Lake                          | 1            | 305.00        | 54.710000    | -101.680000   | lacustrine                 | 10              | 0.12                          | Lynch et al., 2004                                                                                                   |
| Screaming Lynx Lake                  | 1            | 276.00        | 66.068150    | -145.404400   | lacustrine                 | 7.4             | 0.035                         | Kelly et al., 2013                                                                                                   |
| Sears HF                             | 1            | 2.00          | 40.884500    | -72.578300    | lacustrine                 | -999999         | 0.061                         | Oswald et al., 2018; Oswald et al., 2020                                                                             |
| Seba                                 | 1            | 807.00        | 53.476111    | -114.878611   | terrestrial, bog           | -888888         | -999999                       | Magnan et al., 2018                                                                                                  |
| Seedorf                              | 1            | 609.00        | 46.795220    | 7.040450      | lacustrine                 | 7.5             | 0.135                         | Richoz et al., 1994; Richoz, 1998                                                                                    |
| Selikhovo                            | 1            | 209.00        | 53.230000    | 35.770000     | terrestrial, bog           |                 | 0.01                          | Feurdean et al., 2020b; Novenko et al., 2016a                                                                        |
| Semenic                              | 1            | 1500.00       | 45.180000    | 22.059444     | terrestrial, bog           |                 | -999999                       | Rösch and Fischer, 2000                                                                                              |
| Serra Campos Gerais                  | 2            | 1200.00       | -24.660000   | -50.210000    | terrestrial, bog           | -888888         | 0.07                          | Behling, 1997b                                                                                                       |
| Serra da Bocaina                     | 1            | 1500.00       | -22.740000   | -44.550000    | terrestrial, bog           | -777777         |                               | Behling et al., 2007                                                                                                 |
| Serra do Tepequem                    | 1            | 635.00        | 3.792011     | -61.704331    | terrestrial, soil          |                 |                               | Rodríguez-Zorro et al., 2017a                                                                                        |
| Seven Lake                           | 1            | 307.00        | 43.613705    | -88.143562    | lacustrine                 | 7               | 0.1                           | Long et al., 2011b                                                                                                   |
| Seven Lake Mount Zirkel              | 1            | 3276.00       | 40.896000    | -106.681000   | lacustrine                 | 5.75            | 0.032                         | Calder et al., 2015                                                                                                  |
| Shanghai City                        | 1            | 6.00          | 31.130000    | 120.910000    | fluvial                    |                 | -999999                       | Itzstein-Davey et al., 2007                                                                                          |
| Sharkey Lake                         | 1            | 305.00        | 44.590000    | -93.410000    | lacustrine, glacial origin | 15              | 0.28                          | Camill et al., 2003; Geiss et al., 2003; Umbanhowar Jr et al., 2006                                                  |
| Shenjiadian peatland, Sanjiang Plain | 1            | -999999.00    | 46.580000    | 130.660000    | terrestrial, bog           |                 | -999999                       | Gao et al., 2014                                                                                                     |
| Shishou City                         | 1            | -999999.00    | 29.850000    | 112.570000    | lacustrine, fluvial origin | 20              | -999999                       | Gao, 2017                                                                                                            |
| Shuangchi Lake                       | 1            | 40.00         | 19.940000    | 110.190000    | lacustrine, volcanic lake  | 1               | 0.02                          | Dodson et al., 2019                                                                                                  |

| Site name                               | Entities (#) | Elevation (m) | Latitude (°) | Longitude (°) | Site Type                  | Water depth (m) | Basin size (km <sup>2</sup> ) | Citation(s)                                 |
|-----------------------------------------|--------------|---------------|--------------|---------------|----------------------------|-----------------|-------------------------------|---------------------------------------------|
| Shuizhuyang peat bog                    | 2            | 1007.00       | 26.770000    | 119.030000    | terrestrial, bog           |                 | -999999                       | Ma et al., 2018b                            |
| Shuttle                                 | 1            | 276.00        | 59.846160    | -97.635100    | lacustrine                 | 3.31            | 0.957                         | Umbanhowar Jr et al., 2021                  |
| Siberia                                 | 1            | 2920.00       | -17.833333   | -64.718889    | terrestrial, bog           | -888888         | 0.2                           | Mourguiart and Ledru, 2003                  |
| Sidlings Copse                          | 1            | 53.00         | 51.782709    | -1.193905     | terrestrial, fen           | -888888         | -999999                       | Day, 1991                                   |
| Sierra de Gador                         | 1            | 1530.00       | 36.900000    | -2.916700     | lacustrine, drained lake   | -888888         | 0.14                          | Carrión et al., 2003                        |
| Siesta Lake                             | 1            | 2430.00       | 37.850000    | -119.660000   | lacustrine                 | 1.35            | 0.13                          | Brunelle and Anderson, 2003                 |
| Siles Lake                              | 1            | 1320.00       | 38.400000    | -2.500000     | lacustrine                 | 3.5             | 0.0027                        | Carrión, 2002                               |
| Siroki Nyirjes To                       | 1            | 200.00        | 47.926352    | 20.183213     | terrestrial, fen           | -888888         | 0.009                         | Gardner, 2002                               |
| Skanso                                  | 1            | 8.00          | 56.509377    | 8.828720      | lacustrine                 | 8.5             | 0.115                         | Odgaard, 1994                               |
| Sky Lake                                | 1            | 145.00        | 56.483601    | -94.787937    | lacustrine                 | 5               | 0.12                          | Lynch et al., 2004                          |
| Slack Lake Michigan                     | 1            | 282.00        | 42.871670    | -83.610420    | lacustrine                 | 9.45            | 0.19                          | Ballard, 2009                               |
| Slough Creek Pond                       | 1            | 1884.00       | 44.910000    | -110.340000   | lacustrine                 | -999999         | -999999                       | Whitlock and Bartlein, 1993                 |
| Slowinskie Blota Bog                    | 1            | 20.00         | 54.580000    | 16.920000     | terrestrial, bog           | -888888         | -999999                       | de Vleeschouwer et al., 2009                |
| Small Lake, Ontario                     | 1            | 478.00        | 49.581111    | -90.385556    | lacustrine                 | 3.9             | 0.005                         | Senici et al., 2013                         |
| Smygen Bay Blekinge coast               | 1            | -1.00         | 56.150000    | 15.116700     | coastal, estuarine         | 1.4             | -888888                       | Yu et al., 2005                             |
| Snobs Creek                             | 1            | 775.00        | -37.550000   | 145.920000    | terrestrial, bog           | 0               |                               | McKenzie, 1997                              |
| Snowy Flats                             | 1            | 1618.00       | -35.565500   | 148.864167    | terrestrial, bog           | -888888         | 0.12                          | Hope et al., 2005                           |
| Soleve                                  | 1            | 2.00          | -17.250000   | -179.490000   | terrestrial, bog           | 0.5             | -999999                       | Clark and Hope, 1997                        |
| Solomons Jewel Lake                     | 1            | 1185.00       | -41.800000   | 146.260000    | lacustrine                 | -999999         | -999999                       | Dodson, 2001                                |
| Solso                                   | 1            | 41.00         | 56.128367    | 8.613735      | lacustrine                 | 6.5             | 0.02                          | Odgaard, 1994                               |
| Sondambile                              | 1            | 2850.00       | -6.340000    | 147.110000    | lacustrine, glacial origin | 4.8             |                               | Haberle et al., 2005                        |
| Sonenuma Swamp                          | 1            | 86.00         | 35.230000    | 136.190000    | lacustrine                 | 2               | 0.2                           | Hayashi et al., 2012; Inoue et al., 2005    |
| Song Mu Ping Swamp (Jinggang Mountains) | 1            | 1269.00       | 26.580000    | 114.080000    | fluvial                    |                 | -999999                       | Huang et al., 2014                          |
| SONNE95                                 | 1            | -1727.00      | 20.110000    | 117.380000    | marine                     | -888888         | -888888                       | Sun et al., 2000                            |
| Soppensee                               | 1            | 596.00        | 47.091667    | 8.083333      | lacustrine, glacial origin | 27              | 0.24                          | Lotter, 1999; Tinner et al., 2005           |
| South Fork Payette                      | 1            | 1984.00       | 44.200000    | -115.500000   | other                      | -777777         |                               | Pierce et al., 2004                         |
| South Salvation Creek Swamp             | 1            | 132.00        | -33.630000   | 151.250000    | terrestrial, fen           | 0               |                               | Kodela and Dodson, 1988                     |
| Spearman                                | 1            | 368.00        | 46.543900    | -78.502800    | lacustrine                 | 1.5             | 0.031                         | Carcaillet and Richard, 2000                |
| Spring Lake                             | 1            | NA            | 48.577778    | -80.880722    | -777777                    |                 |                               | Senici et al., 2013                         |
| Spruce Pond                             | 1            | 223.00        | 41.239400    | -74.204167    | lacustrine                 | 5               | 0.026                         | Maenza-Gmelch, 1997a; Maenza-Gmelch, 1997b  |
| St Francois                             | 1            | 358.00        | 48.290000    | -72.140000    | lacustrine                 | -777777         |                               | Blarquez et al., 2015; Richard, Unpublished |
| Stara jimka                             | 1            | 1129.00       | 49.068764    | 13.402947     | lacustrine, drained lake   | -888888         | 0.04                          | Bobek et al., 2019                          |
| Stavsakra Bog                           | 1            | 187.00        | 57.024167    | 14.813056     | terrestrial, bog           | -888888         | 0.02                          | Greisman and Gaillard, 2009                 |
| Stazki bog                              | 1            | 195.00        | 54.430000    | 18.084400     | terrestrial, bog           |                 | -999999                       | Gaika et al., 2013                          |
| Steel Lake, Hubbard County              | 1            | 425.00        | 46.973100    | -94.683700    | lacustrine, glacial origin | 21              | 0.23                          | Nelson et al., 2003                         |
| Steerenmoos                             | 1            | 1000.00       | 47.816700    | 8.183300      | terrestrial, bog           | -888888         | 0.2                           | Rösch, 2000                                 |
| Steeve Lake                             | 1            | 548.00        | 51.939972    | -68.155333    | lacustrine                 | 3.5             | 0.034                         | Remy et al., 2017                           |

| Site name                     | Entities (#) | Elevation (m) | Latitude (°) | Longitude (°) | Site Type                  | Water depth (m) | Basin size (km <sup>2</sup> ) | Citation(s)                                          |
|-------------------------------|--------------|---------------|--------------|---------------|----------------------------|-----------------|-------------------------------|------------------------------------------------------|
| Stereoiu                      | 1            | 790.00        | 47.810000    | 23.540000     | -777777                    |                 |                               | Björkman et al., 2003; Feurdean, 2005                |
| Sterne                        | 2            | 304.00        | 52.045388    | -75.158944    | terrestrial, bog           | -888888         | 1.72                          | van Bellen et al., 2012                              |
| Stockyard Swamp Hunter Island | 1            | 65.00         | -40.550000   | 144.750000    | terrestrial, bog           | 0.1             |                               | Hope, 1999                                           |
| Stoll (Quebec Ontario)        | 1            | 303.00        | 44.967000    | -77.283000    | lacustrine                 | 5               | 0.37                          | Keizer et al., 2015                                  |
| Storasjo                      | 1            | 225.00        | 56.933330    | 15.266670     | lacustrine                 | -999999         | 0.025                         | Olsson and Lemdahl, 2010; Olsson et al., 2010        |
| Storm Creek                   | 1            | 1177.00       | -37.444170   | 145.800600    | terrestrial, fen           | -888888         | 0.2                           | McKenzie, 1997                                       |
| Storsandvatnet                | 1            | 106.00        | 63.457500    | 8.454440      | lacustrine                 | 0.7             | -999999                       | Birks et al., 2012                                   |
| Stubno-Naklo                  | 1            | 186.50        | 49.863056    | 22.968889     | lacustrine, drained lake   | -888888         | 0.1                           | Kołaczek et al., 2018b                               |
| Studencheskoe                 | 1            | 124.00        | 55.266400    | 40.201400     | terrestrial, bog           | 0.2             | 0.27                          | Feurdean et al., 2020b; Kupriyanov and Novenko, 2019 |
| Subei Basin                   | 1            | 50.00         | 33.400000    | 119.550000    | terrestrial                |                 | 32800                         | Chen, 2017                                           |
| Sudenpesä Hollow              | 1            | 167.00        | 61.183300    | 25.150000     | terrestrial, small hollow  | -888888         | 0.001                         | Clear et al., 2015                                   |
| Sugun Lake                    | 1            | 198.00        | 62.080000    | 129.480000    | lacustrine                 | 1.6             | 0.48                          | Katamura et al., 2009b                               |
| Sulphur (Yukon)               | 2            | 847.00        | 60.959000    | -137.852000   | lacustrine                 | 10              | 1.5                           | Gajewski et al., 2014                                |
| Summit Lake Mount Zirkel      | 1            | 3149.00       | 40.545000    | -106.682000   | lacustrine                 | 5.85            | 0.019                         | Calder et al., 2015                                  |
| Sundown Swamp                 | 1            | 10.00         | -41.160000   | 144.660000    | terrestrial, bog           | 0               |                               | Hope, 1999                                           |
| Sungai Buluh                  | 1            | 18.00         | -1.236110    | 103.620000    | terrestrial, bog           | -888888         | 180                           | Hapsari et al., 2018                                 |
| Super Cub Lake                | 1            | 486.00        | 62.296611    | -145.347172   | lacustrine                 | 4.7             | 0.03                          | Barrett et al., 2013                                 |
| Supulah Hill                  | 1            | 1580.00       | -4.110000    | 138.960000    | terrestrial, bog           | 1               | -888888                       | Haberle et al., 1991; Hope, 1998                     |
| Surucucho                     | 2            | 3180.00       | -3.060000    | -78.000000    | lacustrine                 | 14              | -777777                       | Colinvaux et al., 1997                               |
| Surusoo                       | 1            | 43.00         | 58.529722    | 22.423056     | terrestrial, bog           | -888888         | 1.08                          | Veski, 1998                                          |
| Sutherland Pond               | 1            | 380.00        | 41.391400    | -74.037700    | lacustrine                 | 2.57            | 0.0405                        | Maenza-Gmelch, 1997a                                 |
| Svartvatnet                   | 1            | 183.00        | 63.351380    | 8.877770      | lacustrine                 | 10              | -999999                       | Birks et al., 2012                                   |
| Swamp Lake Yosemite           | 1            | 1554.00       | 37.950000    | -119.816667   | lacustrine                 | 20              | 0.08                          | Smith and Anderson, 1992                             |
| Swift Lake Michigan           | 1            | 286.00        | 42.885200    | -83.622810    | lacustrine                 | 9.75            | 0.02                          | Ballard, 2009                                        |
| Tadpole Swamp                 | 1            | 60.00         | -38.130000   | 145.270000    | terrestrial, bog           | 0               |                               | Aitken and Kershaw, 1993                             |
| Tagamaucia                    | 1            | 820.00        | -16.490000   | -179.560000   | lacustrine                 | 2               |                               | Hope, 1996b                                          |
| Taibai Lake                   | 2            | 10.00         | 30.000000    | 115.810000    | lacustrine                 | 1.5             | 28.98                         | Tong et al., 2009                                    |
| Taihu Lake                    | 1            | 1.30          | 30.980000    | 120.580000    | terrestrial                |                 | 24.2                          | Li, 2014                                             |
| Tajga                         | 1            | 817.00        | 50.026100    | 12.680355     | terrestrial, bog           | -888888         | 0.65                          | Bobek et al., 2019                                   |
| Takhilt Nuur                  | 1            | 1502.00       | 48.806400    | 96.806200     | lacustrine                 | 5.4             | 4.82                          | Umbanhowar Jr et al., 2009                           |
| Talita Kupai                  | 2            | 33.00         | -10.100000   | 142.120000    | coastal, estuarine         | 0               |                               | Rowe, 2006a                                          |
| Tashkol Lake Ulagan plateau   | 1            | 2150.00       | 50.450000    | 87.670800     | lacustrine, glacial origin | 6.25            | -999999                       | Blyakharchuk et al., 2004                            |
| Taul Muced                    | 1            | 1340.00       | 47.573900    | 24.544600     | terrestrial, bog           |                 | 0.015                         | Feurdean et al., 2015; Feurdean et al., 2020b        |
| Tawney (Quebec Ontario)       | 1            | 276.00        | 44.817000    | -77.183000    | lacustrine                 | 3               | 0.02                          | Keizer et al., 2015                                  |
| Taylor Lake CA                | 1            | 1979.00       | 41.361440    | -122.968648   | lacustrine                 | 9.45            | 0.05                          | Briles et al., 2011                                  |
| Taylor Lake, Oregon           | 1            | 4.00          | 46.100556    | 123.906667    | lacustrine                 | 4.5             | 0.04                          | Long and Whitlock, 2002                              |

| Site name                  | Entities (#) | Elevation (m) | Latitude (°) | Longitude (°) | Site Type                  | Water depth (m) | Basin size (km <sup>2</sup> ) | Citation(s)                                                                                                          |
|----------------------------|--------------|---------------|--------------|---------------|----------------------------|-----------------|-------------------------------|----------------------------------------------------------------------------------------------------------------------|
| Tea Shettigeri             | 1            | 820.00        | 12.046667    | 75.975556     | terrestrial, mire          | -888888         | -999999                       | Nogué et al., 2017                                                                                                   |
| Tea Tree Swamp             | 3            | 900.00        | -37.210000   | 148.830000    | terrestrial, fen           | -888888         | 0.2                           | Gell et al., 1993                                                                                                    |
| Teal Lake Colorado         | 1            | 2689.00       | 40.583000    | -106.608000   | lacustrine                 | 13.09           | 0.061                         | Calder et al., 2015                                                                                                  |
| Teici bog                  | 1            | 114.00        | 56.622408    | 26.440808     | terrestrial, bog           | -888888         | 144                           | Stivrins et al., 2017b; Stivrins, Unpublished                                                                        |
| Tempest Lake Yukon         | 1            | -999999.00    | 69.942250    | -159.383300   | lacustrine                 | 4.8             | 0.115                         | Higuera, Unpublished; Hu, 2015                                                                                       |
| Three Creeks               | 1            | 1996.00       | 44.090000    | -121.620000   | lacustrine                 |                 |                               | Long et al., 2011b                                                                                                   |
| Thunder Lake               | 1            | 3231.00       | 40.221900    | -105.647283   | lacustrine                 | 12              | 0.06                          | Higuera et al., 2014                                                                                                 |
| Tiago Lake Mount Zirkel    | 1            | 2700.00       | 40.579000    | -106.613000   | lacustrine                 | 15              | 0.042                         | Calder et al., 2015                                                                                                  |
| Tiam Point                 | 1            | 3.00          | -10.120000   | 142.180000    | coastal, salt marsh        | -888888         | -999999                       | Rowe, 2006a; Rowe, 2007                                                                                              |
| Tianchi Lake               | 1            | 2430.00       | 35.260000    | 106.310000    | lacustrine                 | 8.2             | 0.02                          | Zhao et al., 2010                                                                                                    |
| Tianluoshan site           | 1            | -999999.00    | 30.020000    | 121.380000    | archaeological site        |                 | -999999                       | Ma et al., 2018a                                                                                                     |
| Tiavatnet                  | 1            | 464.00        | 63.059720    | 9.416940      | lacustrine                 | 7               | -999999                       | Birks et al., 2012                                                                                                   |
| Tiger Snake Swamp          | 1            | 60.00         | -38.130000   | 145.270000    | terrestrial, fen           | 0               |                               | Aitken and Kershaw, 1993                                                                                             |
| Tisice                     | 1            | 160.00        | 50.236944    | 14.532778     | lacustrine, fluvial origin | -888888         | 0.01                          | Dreslerová et al., 2004; Pokorný and Kuneš, 2005; Pokorný, 2005                                                      |
| Todd Lake                  | 1            | 1875.00       | 44.020000    | -121.680000   | lacustrine                 |                 |                               | Long et al., 2011b                                                                                                   |
| Tom Burns                  | 2            | 1075.00       | -37.385560   | 145.818100    | terrestrial, mire          | -888888         | 0.2                           | McKenzie, 1997                                                                                                       |
| Tom Gregory Swamp          | 1            | 1024.00       | -35.648330   | 148.830500    | terrestrial, bog           | -888888         | 0.013                         | Hope, 2005                                                                                                           |
| Tompuda bog                | 1            | 459.00        | 55.130000    | 109.760000    | terrestrial, bog           | -888888         | -999999                       | Krivosnogov et al., 2004; Ogura et al., Unpublished                                                                  |
| Tonquin Creek              | 2            | 1935.00       | 52.733333    | -118.366667   | terrestrial, bog           | -888888         | -999999                       | Kearney and Luckman, 1983a; Kearney and Luckman, 1983b                                                               |
| Torbiera del Biecai        | 1            | 1920.00       | 44.200000    | 7.700000      | terrestrial, bog           | -888888         | -999999                       | Ortu et al., 2008                                                                                                    |
| Torres del Paine           | 1            | 100.00        | -51.080000   | -73.060000    | lacustrine                 | 1               | 0.01                          | Heusser, 1995                                                                                                        |
| Torveraz                   | 1            | 2345.00       | 45.695696    | 6.863743      | terrestrial, bog           | -888888         | -999999                       | Millet et al., 2008b; Miras et al., 2000                                                                             |
| Tourbiere de La Lande      | 1            | 1040.00       | 43.560000    | 2.960000      | terrestrial, bog           | -888888         | -999999                       | Pulido, 2006                                                                                                         |
| Tourbiere des Narses Morte | 1            | 1400.00       | 44.430000    | 3.600000      | terrestrial, bog           | -888888         | -999999                       | Pulido, 2006                                                                                                         |
| Tourbiere du Peschio       | 1            | 1370.00       | 44.450000    | 3.600000      | terrestrial, bog           | -888888         | -999999                       | Pulido, 2006                                                                                                         |
| Toushe Basin               | 2            | 650.00        | 23.820000    | 120.880000    | terrestrial, bog           |                 | 1.75                          | Huang et al., 2020a; Huang et al., 2020b; Huang et al., 2020c                                                        |
| Trail                      | 1            | 2362.00       | 44.280000    | -110.170000   | lacustrine                 | 0               |                               | Whitlock et al., 2003                                                                                                |
| Trebol Lake                | 1            | 758.00        | -41.070000   | -71.490000    | lacustrine                 | 10.5            | 0.4                           | Whitlock et al., 2006                                                                                                |
| Trettetjorn                | 1            | 810.00        | 60.716700    | 7.000000      | lacustrine                 | 7.5             | 0.008                         | Bjune et al., 2005; Bjune, 2005                                                                                      |
| Trikatas lake              | 2            | 50.00         | 57.541160    | 25.714468     | lacustrine                 | 4               | 0.13                          | Stivrins et al., 2015a                                                                                               |
| Trygasen                   | 1            | 549.00        | 61.770000    | 13.300000     | terrestrial, fen           | 0               |                               | Segerström, 1997                                                                                                     |
| Tsagaan Nuur               | 1            | 1382.00       | 48.911800    | 94.867000     | lacustrine                 | 6.6             | 12.42                         | Umbanhowar Jr et al., 2009                                                                                           |
| Tsavkisi                   | 1            | 1100.00       | 41.680000    | 44.710000     | terrestrial, bog           | 0.5             | 0.03                          | Connor and Kvavadze, 2005; Connor, 2006                                                                              |
| Tsogtoo Nuur               | 1            | 2063.00       | 51.345630    | 98.897360     | lacustrine                 | 4               | 0.38                          | <a href="http://www.ncdc.noaa.gov/paleo/study/20516">http://www.ncdc.noaa.gov/paleo/study/20516</a> ; Robinson, 2007 |

| Site name                         | Entities (#) | Elevation (m) | Latitude (°) | Longitude (°) | Site Type                  | Water depth (m) | Basin size (km <sup>2</sup> ) | Citation(s)                                                                                                                                                                                               |
|-----------------------------------|--------------|---------------|--------------|---------------|----------------------------|-----------------|-------------------------------|-----------------------------------------------------------------------------------------------------------------------------------------------------------------------------------------------------------|
| Tswaing Crater                    | 1            | 1100.00       | -25.415800   | 28.100600     | lacustrine                 | 3               | 0.4                           | Partridge et al., 1997; Scott et al., 2008; Scott, Unpublished                                                                                                                                            |
| Tubilla del Lago                  | 1            | 900.00        | 41.808400    | -3.572700     | terrestrial, bog           |                 | 0.05                          | Morales-Molino et al., 2017b                                                                                                                                                                              |
| Tugupugua                         | 1            | 2300.00       | -5.660000    | 142.610000    | terrestrial, fen           | 0               |                               | Haberle and Ledru, 2001                                                                                                                                                                                   |
| Tumalo Lake                       | 1            | 1536.00       | 44.040833    | -121.903056   | lacustrine                 | -999999         | 0.07                          | Long et al., 2011a                                                                                                                                                                                        |
| Tungak Lake                       | 1            | 25.00         | 61.430000    | -164.200000   | lacustrine                 | 15.4            | 1.17                          | Chipman et al., 2015                                                                                                                                                                                      |
| Tuqiang Town                      | 1            | 468.00        | 52.940000    | 122.860000    | terrestrial, mire          |                 | -999999                       | Xin and Yiyin, 2015                                                                                                                                                                                       |
| Turbuta                           | 1            | 275.00        | 47.372500    | 23.498600     | lacustrine, drained lake   |                 | 0.015                         | Feurdean et al., 2007                                                                                                                                                                                     |
| Turtle Lake                       | 1            | 80.00         | 49.327300    | -124.961100   | lacustrine                 | 10              | 0.15                          | Brown et al., 2006                                                                                                                                                                                        |
| Tuskegee Pond                     | 1            | 240.00        | 35.580000    | -84.210000    | lacustrine                 | 0.4             |                               | Cridlebaugh, 1984; Delcourt and Delcourt, 1997a; Delcourt and Delcourt, 1997b; Delcourt and Delcourt, 1998; Delcourt et al., 1983; Delcourt et al., 1986; Delcourt et al., 1998; Meeks, 2004; Meeks, 2005 |
| Twin Lake                         | 1            | 376.00        | 50.952472    | -74.575333    | lacustrine                 | 5.7             | 0.029                         | El-Guellab et al., 2015                                                                                                                                                                                   |
| Two Hill Lake                     | 1            | 200.00        | 55.980000    | -97.280000    | lacustrine                 | 16              | 0.1                           | Lynch et al., 2004                                                                                                                                                                                        |
| Tyrendarra Swamp                  | 1            | 13.00         | -38.190000   | 141.760000    | terrestrial, marsh         | 0.3             | 0.12                          | Builth et al., 2008                                                                                                                                                                                       |
| Uchugrak                          | 2            | 216.00        | 68.050000    | -161.720000   | lacustrine                 | 9.2             | 0.092                         | Higuera et al., 2011                                                                                                                                                                                      |
| Umpawaug HF                       | 1            | 138.00        | 41.306100    | -73.449700    | lacustrine                 | -999999         | 0.053                         | Oswald et al., 2018; Oswald et al., 2020                                                                                                                                                                  |
| Uncle Seth's HF                   | 1            | 13.00         | 41.433100    | -70.664700    | lacustrine                 | -999999         | 0.046                         | Oswald et al., 2018; Oswald et al., 2020                                                                                                                                                                  |
| Union Lake Rice County            | 1            | 306.00        | 44.461100    | -93.307400    | lacustrine                 | 3               | 1.61                          | <a href="https://www.ncdc.noaa.gov/paleo/study/21074">https://www.ncdc.noaa.gov/paleo/study/21074</a>                                                                                                     |
| Unit Lake                         | 1            | 249.00        | 59.404000    | -97.493000    | lacustrine                 | 11.4            | 0.644                         | Camill et al., 2012                                                                                                                                                                                       |
| Upper Capsule Lake                | 1            | 800.00        | 68.628600    | -149.413528   | lacustrine                 | 5.7             | 0.011                         | Chipman et al., 2015                                                                                                                                                                                      |
| Upper Rocket Creek Bog            | 2            | 1710.00       | 47.040000    | -115.880000   | terrestrial, mire          |                 | -999999                       | Benson and Mensing, Unpublished                                                                                                                                                                           |
| Upper Squaw Lake                  | 1            | 930.00        | 42.030000    | -123.010000   | lacustrine                 | 14.1            | 0.072                         | Colombaroli and Gavin, 2010                                                                                                                                                                               |
| UpperFly (Yukon)                  | 2            | 1326.00       | 61.040000    | -138.090000   | lacustrine                 | 4               | 0.105                         | Gajewski et al., 2014                                                                                                                                                                                     |
| Utikuma                           | 1            | 675.00        | 56.076389    | -115.475278   | terrestrial, bog           | -888888         | -999999                       | Magnan et al., 2018                                                                                                                                                                                       |
| Uzunkol Lake                      | 1            | 1985.00       | 50.483300    | 87.108300     | lacustrine, glacial origin | 5.9             | -999999                       | Blyakharchuk et al., 2004                                                                                                                                                                                 |
| Vaike Juusa                       | 2            | 122.00        | 58.050000    | 26.500000     | lacustrine                 | 6               | 0.03                          | Kangur, 2009; Punning et al., 2005                                                                                                                                                                        |
| Valle di Castiglione              | 1            | 44.00         | 41.891700    | 12.759700     | lacustrine, drained lake   | 0               | 0.8                           | Alessio et al., 1986; Magri, 2004                                                                                                                                                                         |
| Valle do Lobo Ribeira de Carcavai | 2            | 2.30          | 37.057965    | -8.074734     | coastal, estuarine         | -888888         | -888888                       | Schneider et al., 2010; Schneider et al., 2016                                                                                                                                                            |
| Valle Pequeno                     | 1            | 2520.00       | -3.975000    | -79.073611    | terrestrial, bog           |                 | 0.08                          | Rodríguez and Behling, 2010                                                                                                                                                                               |
| Vapsko-2                          | 1            | 2120.00       | 42.070000    | 23.524500     | terrestrial, bog           | -888888         | 0.002                         | Feurdean et al., 2019b; Feurdean et al., 2020b                                                                                                                                                            |
| Vargas Lake                       | 1            | 246.00        | -12.370000   | -68.890000    | lacustrine                 | 2               | 0.8                           | Bush et al., 2007b                                                                                                                                                                                        |
| Vedruka                           | 1            | 21.00         | 58.330278    | 22.060556     | terrestrial, bog           | -888888         | 0.9                           | Poska and Saarse, 2002b                                                                                                                                                                                   |
| Vega Nandu                        | 1            | 200.00        | -50.930000   | -72.760000    | terrestrial, mire          | -888888         | -999999                       | Villa-Martínez and Moreno, 2007                                                                                                                                                                           |
| Velise                            | 1            | 26.40         | 58.756667    | 24.460278     | terrestrial, bog           | 1               | 0.32                          | Veski, 1998                                                                                                                                                                                               |
| Velke ohbí                        | 1            | 528.00        | 50.604057    | 16.127125     | terrestrial, bog           | -888888         | 0.02                          | Bobek et al., 2019                                                                                                                                                                                        |

| Site name                     | Entities (#) | Elevation (m) | Latitude (°) | Longitude (°) | Site Type                        | Water depth (m) | Basin size (km <sup>2</sup> ) | Citation(s)                                                      |
|-------------------------------|--------------|---------------|--------------|---------------|----------------------------------|-----------------|-------------------------------|------------------------------------------------------------------|
| Verdeospesoa                  | 1            | 1015.00       | 43.055000    | -2.861400     | terrestrial, bog                 | -888888         | 0.000516                      | Pérez-Díaz and López-Sáez, 2017; Pérez-Díaz and López-Sáez, 2019 |
| Verijarv                      | 1            | 90.00         | 57.808333    | 27.058333     | lacustrine                       | 19.3            | 0.25                          | Niinemets and Saarse, 2006                                       |
| Verny des Brulons             | 1            | 565.00        | 47.317778    | 4.122778      | terrestrial, bog                 | -888888         | -999999                       | Jouffroy-Bapicot et al., 2013; Jouffroy-Bapicot, 2010            |
| Vesijako Hollow               | 1            | 160.00        | 61.383300    | 25.033300     | terrestrial, small hollow        | -888888         | 0.001                         | Clear et al., 2013                                               |
| Vestre Oykjamyrtn             | 1            | 570.00        | 59.816700    | 6.000000      | lacustrine                       | 8               | 0.018                         | Bjune et al., 2005; Bjune, 2005                                  |
| Viitna Pikkjarv               | 2            | 76.50         | 59.446389    | 26.010556     | lacustrine                       | 4.2             | 0.16                          | Saarse et al., 1998                                              |
| Vilamora Ribeira de Quarteira | 2            | 3.50          | 37.085422    | -8.136923     | coastal, estuarine               | -888888         | -888888                       | Schneider et al., 2010; Schneider et al., 2016                   |
| Villaverde                    | 1            | 870.00        | 38.800000    | -2.366700     | terrestrial, fen                 | -888888         | 1                             | Carrión et al., 2001a                                            |
| Villebois                     | 3            | 272.00        | 49.421100    | -79.003000    | terrestrial, bog                 | -888888         | -999999                       | Magnan et al., 2020                                              |
| Vinillos                      | 2            | 2090.00       | -0.591412    | -77.858561    | terrestrial                      | -888888         | -999999                       | Loughlin et al., 2018a                                           |
| Vlcek                         | 1            | 769.00        | 50.039798    | 12.731939     | terrestrial, fen                 | -888888         | 0.165                         | Bobek et al., 2019                                               |
| Voli Voli                     | 1            | 2.00          | -18.160000   | 177.480000    | terrestrial, bog                 | 0.5             | 0.2                           | Dickinson et al., 1998                                           |
| Vrbka                         | 1            | 189.00        | 50.386660    | 14.130550     | terrestrial, bog                 | -888888         | -999999                       | Pokorný, 2016                                                    |
| Vunimoli                      | 1            | 251.00        | -18.220000   | 177.880000    | terrestrial, bog                 | 0.5             |                               | Hope et al., 2009                                                |
| Vuoskkujarvi                  | 1            | 384.00        | 68.345550    | 19.100000     | lacustrine                       | 18              | 0.68                          | Bigler et al., 2002                                              |
| Wadi Shallalah                | 2            | 385.00        | 32.590000    | 35.940000     | fluvial                          | 0               | -999999                       | Cordova, 2008                                                    |
| Wadian village                | 1            | -999999.00    | 34.190000    | 113.400000    | archaeological site              |                 | 1.06                          | Li et al., 2017                                                  |
| Waikaremoana                  | 1            | 582.00        | -38.774500   | 177.112400    | lacustrine, tectonic origin      | 248             | 56                            | Newnham et al., 1998                                             |
| Waitabu                       | 1            | 43.00         | -18.230000   | -178.780000   | other                            | 0.5             |                               | Latham et al., 1983                                              |
| Walker Lake                   | 1            | 950.00        | 48.529101    | -124.003118   | lacustrine                       | -999999         | 0.0038                        | Brown and Hebda, 2003                                            |
| Wanda                         | 1            | 440.00        | -2.330000    | 121.230000    | terrestrial, bog                 | 0               | 0.05                          | Hope, 2001                                                       |
| Wanum                         | 1            | 35.00         | -6.630000    | 146.790000    | lacustrine                       | 3.5             |                               | Haberle et al., 2005                                             |
| Ware HF                       | 1            | 4.00          | 42.482500    | -70.882500    | lacustrine                       | -999999         | 0.011                         | Oswald et al., 2018; Oswald et al., 2020                         |
| Warner Lake                   | 1            | 590.00        | 44.240000    | -122.950000   | lacustrine                       | 18              | 0.155                         | Walsh et al., 2010b                                              |
| Warrananga                    | 1            | 22.00         | -33.970000   | 141.560000    | lacustrine, salt lake, permanent | 0.2             |                               | Cupper, 2005; Cupper, 2006                                       |
| Warrimoo Swamp                | 1            | 195.00        | -33.720000   | 150.610000    | terrestrial, mire                | -888888         | -999999                       | Chalson and Martin, 2009; Chalson, 1991                          |
| Waruid                        | 2            | 5.00          | -10.400000   | 142.090000    | coastal                          | 0.5             | -999999                       | Rowe, 2006a; Rowe, 2007                                          |
| Weinan                        | 1            | 650.00        | 34.060000    | 109.000000    | terrestrial, loess               | 0               |                               | Wang et al., 2005                                                |
| Wentworth Lake                | 1            | 47.00         | 48.016667    | -124.533333   | lacustrine                       | 27              | 0.19                          | Gavin and Brubaker, 2015                                         |
| Werth Lake                    | 1            | 302.00        | -11.740000   | -69.230000    | lacustrine                       | 1.5             | 0.25                          | Bush et al., 2007b                                               |
| West Crazy Lake               | 1            | -999999.00    | 65.891420    | -145.621950   | lacustrine                       | 6.1             | -999999                       | Kelly et al., 2013                                               |
| West Lomond                   | 1            | 522.00        | 56.250000    | -3.280000     | terrestrial, bog                 | -888888         | -999999                       | Edwards and Whittington, 1997                                    |
| West Olaf Lake                | 1            | 402.00        | 46.610000    | -96.180000    | lacustrine                       | 18              | 0.58                          | Nelson et al., 2003                                              |
| Westside HF                   | 1            | 390.00        | 41.855600    | -73.256600    | lacustrine                       | -999999         | 0.157                         | Oswald et al., 2018; Oswald et al., 2020                         |
| Wet Lagoon                    | 1            | 700.00        | -34.470000   | 149.250000    | terrestrial, bog                 | 0               |                               | Dodson, 1986                                                     |

| Site name                   | Entities (#) | Elevation (m) | Latitude (°) | Longitude (°) | Site Type                      | Water depth (m) | Basin size (km <sup>2</sup> ) | Citation(s)                                                                |
|-----------------------------|--------------|---------------|--------------|---------------|--------------------------------|-----------------|-------------------------------|----------------------------------------------------------------------------|
| Whale Lake Mount Zirkel     | 1            | 3059.00       | 40.556000    | -106.675000   | lacustrine                     | 11.48           | 0.039                         | Calder et al., 2015                                                        |
| Whitehaven Swamp            | 1            | 45.00         | -20.300000   | 148.900000    | terrestrial, fen               | 1.1             | -999999                       | Genever et al., 2003                                                       |
| Whyac Lake                  | 1            | 15.00         | 48.672200    | -124.844400   | lacustrine, glacial origin     | -999999         | 0.025                         | Brown and Hebda, 2002; Brown et al., 2006                                  |
| Wickett Pond                | 1            | 330.00        | 42.570000    | -72.431670    | lacustrine                     | 2.25            | 0.115                         | Francis and Foster, 2001                                                   |
| Wilcox Pass                 | 2            | 2355.00       | 52.241667    | -117.216667   | terrestrial                    | -888888         | -999999                       | Beaudoin and King, 1986; Beaudoin and King, 1990; Beaudoin, 1984           |
| wild tussock                | 1            | 250.00        | 67.150000    | -151.860000   | lacustrine, thermokarst origin | -999999         | 0.02                          | Higuera et al., 2009                                                       |
| Wild Tussock Lake           | 1            | 290.00        | 67.128000    | -151.382000   | lacustrine, glacial origin     | -999999         | 0.15                          | Higuera et al., 2009                                                       |
| Wildcat Lake                | 1            | 67.00         | 37.960000    | -122.780000   | lacustrine                     | 8.65            | -999999                       | Scott and Woodborne, 2007                                                  |
| Wilder See am Ruhestein     | 1            | 910.00        | 48.569700    | 8.236900      | lacustrine, glacial origin     | 11.5            | 0.021                         | Rösch, 2009                                                                |
| Wildes Meadow Swamp         | 1            | 670.00        | -34.620000   | 150.510000    | terrestrial, fen               | 0               |                               | Kodela, 1996                                                               |
| Wildseemoor bei Kaltenbronn | 2            | 909.00        | 48.719700    | 8.458900      | lacustrine                     | -999999         | 0.0115                        | Rösch, 2007                                                                |
| Wildwood Lake               | 1            | 5.00          | 40.892000    | -72.673300    | lacustrine                     | 18              | 0.26                          | Oswald et al., 2010; Oswald et al., 2020                                   |
| Wilson Bog                  | 1            | 425.00        | -34.970000   | 138.690000    | terrestrial, bog               | 0               |                               | Buckman et al., 2009                                                       |
| Windy Lake                  | 1            | -999999.00    | 66.041690    | -145.754710   | lacustrine                     | 11.6            | -999999                       | Kelly et al., 2013                                                         |
| Wingecarribee Swamp         | 1            | 685.00        | -34.560000   | 150.510000    | terrestrial, fen               | 0               |                               | de Montford, 2008                                                          |
| Wonderkrater                | 2            | 1100.00       | -24.433600   | 28.751900     | archaeological site            |                 | -999999                       | McCarthy et al., 2010; Scott et al., 2003; Scott et al., 2008; Scott, 2002 |
| Worimi Swamp                | 1            | 8.00          | -32.510000   | 152.330000    | terrestrial, bog               | 0.1             |                               | Mooney and Maltby, 2006                                                    |
| Wulan Pond                  | 1            | -999999.00    | 45.150000    | 121.950000    | terrestrial, bog               |                 | 76                            | He et al., 2015                                                            |
| Wyelangta                   | 1            | 450.00        | -38.647220   | 143.461400    | fluvial                        | -888888         | -999999                       | McKenzie and Kershaw, 2000                                                 |
| Xere Wapo                   | 3            | 220.00        | -22.290000   | 166.970000    | lacustrine                     | 2               | 0.85                          | Stevenson and Hope, 2005; Stevenson et al., 2010                           |
| Xiadawu                     | 1            | 3988.00       | 35.000000    | 99.260000     | archaeological site            |                 | -999999                       | Zhao et al., 2016                                                          |
| Xialu peatland              | 1            | -999999.00    | 21.300000    | 109.820000    | terrestrial, bog               |                 | -999999                       | Xue et al., 2015                                                           |
| Xiang'ao village            | 1            | 5.00          | 30.010000    | 121.370000    | archaeological site            |                 | -999999                       | Shuyun et al., 2010                                                        |
| Xiangcheng County           | 1            | -999999.00    | 33.950000    | 113.480000    | terrestrial, loess             |                 | -999999                       | Mu et al., 2017                                                            |
| Xiaoshan district, Hangzhou | 1            | -999999.00    | 30.150000    | 120.220000    | fluvial                        |                 | -999999                       | Shu et al., 2010                                                           |
| Xindi Lake                  | 1            | 240.00        | 67.111667    | 152.491667    | lacustrine, glacial origin     | -999999         | 0.07                          | Higuera et al., 2009                                                       |



| Site name                    | Entities (#) | Elevation (m) | Latitude (°) | Longitude (°) | Site Type                  | Water depth (m) | Basin size (km <sup>2</sup> ) | Citation(s)                         |
|------------------------------|--------------|---------------|--------------|---------------|----------------------------|-----------------|-------------------------------|-------------------------------------|
| Xindian, Guanzhong Basin     | 1            | 608.00        | 34.380000    | 107.800000    | terrestrial, loess         |                 | -999999                       | Li et al., 2009                     |
| Xingyun Lake                 | 1            | 1723.00       | 24.330000    | 102.770000    | lacustrine                 | 7.3             | 34.329                        | Ji et al., 2018                     |
| Xinwopu Village              | 1            | -999999.00    | 34.570000    | 109.530000    | terrestrial, loess         |                 | -999999                       | Mu et al., 2016                     |
| Xishan relic site            | 2            | 130.00        | 34.910000    | 113.530000    | terrestrial, loess         | 0               |                               | Wang et al., 2004a                  |
| Xishuangbanna                | 1            | 900.00        | 21.500000    | 101.500000    | terrestrial, fen           | 1               |                               | Gu et al., 2007                     |
| Xujianan                     | 1            | 1620.00       | 35.500000    | 106.000000    | -777777                    | 0               |                               | Huang et al., 2006                  |
| Xujiannian                   | 1            | 1620.00       | 35.400000    | 105.800000    | archaeological site        |                 | -999999                       | Huang et al., 2006                  |
| Yacata Pond                  | 1            | 2.00          | -17.150000   | -179.510000   | terrestrial, bog           | 0.5             | -999999                       | Hope et al., 2009                   |
| Yaguaru                      | 1            | 195.00        | -15.600000   | -63.210000    | lacustrine                 | 1.1             |                               | Taylor et al., 2010; Taylor, 2005   |
| Yahoo Lake                   | 1            | 710.00        | 47.683333    | -124.016667   | lacustrine                 | 18              | 0.037                         | Gavin et al., 2013                  |
| Yaila-Crimea                 | 1            | 1205.00       | 44.480000    | 34.050000     | terrestrial                | 0               |                               | Cordova and Lehman, 2005            |
| Yaksha2                      | 2            | 140.00        | 61.700000    | 55.570000     | terrestrial, mire          |                 | 0.04                          | Barhoumi et al., 2019               |
| Yaksha3                      | 2            | 130.00        | 61.730000    | 55.490000     | terrestrial, mire          |                 | 0.024                         | Barhoumi et al., 2019               |
| Yamaska                      | 1            | 265.00        | 45.457800    | -72.871900    | lacustrine                 | 3.5             | 0.002                         | Carcaillet and Richard, 2000        |
| Yangjiawan paleosoil         | 1            | 1219.00       | 39.460000    | 110.170000    | other                      | 0               |                               | Xu et al., 2002                     |
| Yano                         | 1            | 40.00         | 7.380000     | 134.540000    | terrestrial                | 0               |                               | Athens and Ward, 2005               |
| Yao He Cun, Guanzhong Basin  | 1            | 850.00        | 35.450000    | 109.750000    | terrestrial, loess         |                 | -999999                       | Tan et al., 2013                    |
| Yaouk Swamp                  | 1            | 1100.00       | -35.490000   | 148.500000    | lacustrine, drained lake   | 0               | 2.55                          | Keaney and Hope, 2003               |
| Yawi Ti                      | 1            | 1150.00       | -6.610000    | 143.880000    | terrestrial, bog           | 0               |                               | Haberle, 2007                       |
| Yelle                        | 1            | 356.00        | 48.503900    | -79.637800    | lacustrine                 | -999999         | 0.032                         | Carcaillet and Richard, 2000        |
| Ylimmainen Kuivajarvi        | 1            | 255.00        | 66.350000    | 29.616700     | lacustrine                 | 1.5             | 0.18                          | Sarmaja-Korjonen, 1998              |
| Yuanchi (Changbai Mountains) | 1            | 1282.00       | 42.000000    | 128.400000    | terrestrial, bog           |                 | 4.04                          | Gao et al., 2016                    |
| Yucheng village              | 1            | -999999.00    | 29.670000    | 111.660000    | terrestrial                |                 | -999999                       | Tan et al., 2017                    |
| Zadeikiai Bog                | 1            | 120.00        | 56.170000    | 21.980000     | terrestrial, bog           | -888888         | 1.92                          | Stančikaitė et al., 2003            |
| Zagas Nuur                   | 1            | 2376.00       | 48.506100    | 90.609900     | lacustrine                 | 15.9            | 0.64                          | Umbanhowar Jr et al., 2009          |
| Zahaji                       | 1            | 232.00        | 50.379444    | 14.115556     | terrestrial, fen           | -888888         | -999999                       | Pokorný et al., 2010; Pokorný, 2005 |
| Zeller See                   | 1            | 577.00        | 48.002222    | 9.646667      | lacustrine, glacial origin | 3.6             | 0.033                         | Rösch and Marinova, 2020            |
| Zhongzhouzi Lake             | 1            | -999999.00    | 29.800000    | 112.750000    | lacustrine, fluvial origin | 4               | -999999                       | Gao, 2017                           |
| Zhouyuan Qishan Mountain     | 1            | -999999.00    | 34.430000    | 107.750000    | terrestrial, loess         |                 | -999999                       | Han, 2000                           |
| Zofinsky prales              | 1            | 785.00        | 48.664442    | 14.705347     | terrestrial, small hollow  | -888888         | 0.009                         | Bobek et al., 2018                  |
| Zoige Basin                  | 1            | 3467.00       | 33.450000    | 102.630000    | terrestrial, bog           |                 | 4500                          | Zhao et al., 2017b                  |
| Zurath Islet Swamp           | 2            | 3.00          | -10.160000   | 142.060000    | terrestrial, bog           | -888888         | -999999                       | Rowe, 2006a; Rowe, 2007             |

SI Table 2. List of pre-defined valid choices for restricted fields in the Reading Palaeofire Database version 1 (RPDv1).

| Table     | Field     | Valid choices                                                                                                                                                                                                                                                                                                                                                                                                      |
|-----------|-----------|--------------------------------------------------------------------------------------------------------------------------------------------------------------------------------------------------------------------------------------------------------------------------------------------------------------------------------------------------------------------------------------------------------------------|
| date_info | age_used  | no<br>yes<br>not known<br>not recorded                                                                                                                                                                                                                                                                                                                                                                             |
|           | date_type | AMS<br>Radiocarbon date<br>Annual laminations<br>Cs<br>IRSL<br>Liquid Scintillation Counting<br>OSL<br>Palaeomagnetic date<br>Pb<br>TL<br>Uranium Thorium dating<br>Other<br>Top of core known<br>Publication date used as estimate of top of core age<br>(1950 AD = 0)<br>Archaeological dating<br>Pollen correlation<br>Stratigraphic correlation<br>Tephra<br>Known Fire<br>Hiatus<br>not known<br>not recorded |

|  |                |                                                                                                                                                                                                                                                                                                                                                                                                                                                                 |
|--|----------------|-----------------------------------------------------------------------------------------------------------------------------------------------------------------------------------------------------------------------------------------------------------------------------------------------------------------------------------------------------------------------------------------------------------------------------------------------------------------|
|  | material_dated | archaeological artifact<br>bulk sediment<br>bulk sediment, calcareous deposits<br>bulk sediment, diatomaceous<br>bulk sediment, gyttja<br>bulk sediment, organic lake deposits<br>bulk sediment, peat<br>charcoal<br>feldspar<br>foraminifera<br>organic matter<br>pollen<br>shells<br>soil<br>aquatic plant macrofossil<br>terrestrial plant macrofossil<br>undifferentiated plant macrofossil<br>wood<br>other<br>not applicable<br>not known<br>not recorded |
|--|----------------|-----------------------------------------------------------------------------------------------------------------------------------------------------------------------------------------------------------------------------------------------------------------------------------------------------------------------------------------------------------------------------------------------------------------------------------------------------------------|

|        |                      |                                                                                                                                                                                                                                           |
|--------|----------------------|-------------------------------------------------------------------------------------------------------------------------------------------------------------------------------------------------------------------------------------------|
|        | reason_age_not_used  | <empty><br>age too old<br>age too young<br>contamination suspected<br>inconsistent with other dates<br>infinite age<br>probably reworked<br>reworked<br>small sample<br>other<br>not applicable<br>not known<br>not recorded              |
| entity | core_location        | central core<br>marginal core<br>not applicable<br>not known<br>not recorded                                                                                                                                                              |
|        | depositional_context | archaeological<br>bog sediment<br>buried organic sediment<br>buried surface<br>estuarine sediment<br>fluvial/alluvial sediment<br>lake sediment<br>loess<br>marine sediment<br>small hollow<br>soil<br>other<br>not known<br>not recorded |

|  |                    |                                                                                                                                                                                                                                                                                                                                                                                                                                                                                                                                                                          |
|--|--------------------|--------------------------------------------------------------------------------------------------------------------------------------------------------------------------------------------------------------------------------------------------------------------------------------------------------------------------------------------------------------------------------------------------------------------------------------------------------------------------------------------------------------------------------------------------------------------------|
|  | measurement_method | <p>Acidification of sample using gas chromatography to measure elemental carbon (Verardo et al., 1990)</p> <p>Charcoal particles identified by imaging software</p> <p>Charcoal particles identified in thin slides (soil micromorphology)</p> <p>Charcoal separated by heavy liquid preparation</p> <p>Cumulative probability (95% confidence interval) alluvial soil charcoal</p> <p>GRAVIMETRIC chemical assay (Winkler method)</p> <p>Hand picked charcoal from soil samples</p> <p>Pollen slide</p> <p>Sieved</p> <p>Other</p> <p>not known</p> <p>not recorded</p> |
|  | source             | <p>author</p> <p>Arctic Data Center</p> <p>EPD</p> <p>Global Charcoal Database Version 3</p> <p>Global Charcoal Database Version 4</p> <p>Global Charcoal Database Web version</p> <p>IMPD</p> <p>Neotoma</p> <p>NOAA</p> <p>Pangaea</p> <p>digitized from publication</p>                                                                                                                                                                                                                                                                                               |
|  | TYPE               | <p>charcoal area</p> <p>concentration</p> <p>count</p> <p>raw count</p> <p>influx</p> <p>per unit weight</p> <p>pollen concentration</p> <p>other</p>                                                                                                                                                                                                                                                                                                                                                                                                                    |

|            |                  |                                                                                                                                                                                                                          |
|------------|------------------|--------------------------------------------------------------------------------------------------------------------------------------------------------------------------------------------------------------------------|
| model_name | model_name       | BACON_INTCAL13<br>calib 5.0.2<br>calpal 2007 hulu curve<br>fairbanks0107<br>linear interpolation<br>OxCal P_Sequence<br>polynomial interpolation<br>smoothing spline interpolation<br>other<br>not known<br>not recorded |
| site       | basin_size_class | very large (more than 500 km2)<br>large (50.1-500 km2)<br>medium (1.1-50 km2)<br>small (0.01-1 km2)<br>very small (less than 0.01 km2)<br>not applicable<br>not known<br>not recorded                                    |
|            | catch_size_class | large (more than 500 km2)<br>medium (10.1-500 km2)<br>small (less than 10 km2)<br>not applicable<br>not known<br>not recorded                                                                                            |
|            | flow_type        | closed - no inflow or outflow<br>in and out flow<br>inflow only<br>outflow only<br>not applicable<br>not known<br>not recorded                                                                                           |

|  |           |                                                                                                                                                                                                                                                                                                                                                                                                                                                                                                                                                                                                                                                 |
|--|-----------|-------------------------------------------------------------------------------------------------------------------------------------------------------------------------------------------------------------------------------------------------------------------------------------------------------------------------------------------------------------------------------------------------------------------------------------------------------------------------------------------------------------------------------------------------------------------------------------------------------------------------------------------------|
|  | site_type | archaeological site<br>coastal<br>coastal, estuarine<br>coastal, salt marsh<br>fluvial<br>lacustrine<br>lacustrine, drained lake<br>lacustrine, fluvial origin<br>lacustrine, glacial origin<br>lacustrine, playa<br>lacustrine, salt lake, permanent<br>lacustrine, tectonic origin<br>lacustrine, thermokarst origin<br>lacustrine, volcanic lake<br>marine<br>terrestrial<br>terrestrial, bog<br>terrestrial, buried fen<br>terrestrial, fen<br>terrestrial, loess<br>terrestrial, marsh<br>terrestrial, mire<br>terrestrial, mound spring or spring<br>terrestrial, small hollow<br>terrestrial, soil<br>other<br>not known<br>not recorded |
|--|-----------|-------------------------------------------------------------------------------------------------------------------------------------------------------------------------------------------------------------------------------------------------------------------------------------------------------------------------------------------------------------------------------------------------------------------------------------------------------------------------------------------------------------------------------------------------------------------------------------------------------------------------------------------------|

SI Table 3: List of charcoal measurement units currently used in the reading Palaeofire Database version 1

| <b>UNIT</b>                                               |
|-----------------------------------------------------------|
| % BC concentration                                        |
| % concentration of pollen sum <40µm                       |
| % concentration of pollen sum >20µm                       |
| % dry weight                                              |
| % of pollen sum                                           |
| % of pollen sum <125µm                                    |
| % of pollen sum <25µm                                     |
| % of pollen sum >120µm                                    |
| % of pollen sum >25µm                                     |
| % of pollen sum 25-80µm                                   |
| % of pollen sum 5-150µm                                   |
| % of pollen sum 5-50µm                                    |
| % of pollen sum 50-200µm                                  |
| % of sample >125µm                                        |
| % total organic fraction                                  |
| <180µm x 10 <sup>4</sup> relective graminoid cuticle area |
| >100 µm                                                   |
| 25-50 µm/ml                                               |
| 50-100 µm/ml                                              |
| area >180µm mm <sup>-2</sup> cm <sup>-3</sup>             |
| area >180µm mm <sup>-2</sup> ml <sup>-1</sup>             |
| area 10-150µm µm <sup>-2</sup> cm <sup>-3</sup>           |
| area 45-95µm µm <sup>-2</sup> cm <sup>-3</sup>            |
| area cm <sup>-2</sup> yr <sup>-1</sup>                    |
| area cm <sup>-3</sup>                                     |
| area ml <sup>-1</sup> *1000                               |
| area mm <sup>-2</sup> g <sup>-1</sup>                     |
| charcoal concentration *1000                              |
| charcoal concentration *10000                             |
| charcoal probability*100                                  |
| cm <sup>-2</sup> cm <sup>-3</sup>                         |
| cm <sup>-2</sup> cm <sup>-3</sup> *10                     |



|                                                                 |
|-----------------------------------------------------------------|
| cm-2 ml-1                                                       |
| concentration                                                   |
| cumulative probability (95 % CI) for alluvial fan soil charcoal |
| Delta 13C soil charcoal                                         |
| frag/cm3 (conc)                                                 |
| fragments                                                       |
| fragments 10-125µm                                              |
| fragments 10-150µm                                              |
| fragments 10-150µm cm-3                                         |
| fragments 10-50µm cm-3                                          |
| fragments 5-150µm                                               |
| fragments 5-200µm cm-3                                          |
| fragments <100µm                                                |
| fragments <100µm cm-3                                           |
| fragments <120µm cm-2 yr-1                                      |
| fragments <120µm cm-3                                           |
| fragments <125µm                                                |
| fragments <125µm cm-2 cm-3                                      |
| fragments <125µm cm-2 yr-1                                      |
| fragments <150µm                                                |
| fragments <150µm cm-3                                           |
| fragments <25µm cm-2                                            |
| fragments <25µm*0.1                                             |
| fragments <40µm                                                 |
| fragments <40µm (concentration)                                 |
| fragments <50µm (concentration)                                 |
| fragments <50µm cm-2 yr-1                                       |
| fragments <50µm g-1                                             |
| fragments <50µm*0.1 (concentration)                             |
| fragments >1000µm                                               |
| fragments >1000µm cm-2 yr-1                                     |
| fragments >1000µm cm-3                                          |
| fragments >100µm                                                |
| fragments >100µm cm-2                                           |
| fragments >100µm cm-2 yr-1                                      |

|                                         |
|-----------------------------------------|
| fragments >100µm cm-2 yr-1              |
| fragments >100µm cm-3                   |
| fragments >100µm g-1                    |
| fragments >10µm                         |
| fragments >10µm (concentration)         |
| fragments >10µm cm-2 yr-1               |
| fragments >10µm cm-3                    |
| fragments >10µm g-1*1000                |
| fragments >125µm                        |
| fragments >125µm cm-2 yr-1              |
| fragments >125µm cm-3                   |
| fragments >125µm g-1                    |
| fragments >125µm ml-1                   |
| fragments >125µm normalized             |
| fragments >150µm                        |
| fragments >150µm (ordinal scale 0 to 8) |
| fragments >150µm cm-2 yr-1              |
| fragments >150µm cm-3                   |
| fragments >150µm g-1                    |
| fragments >150µm influx                 |
| fragments >15µm                         |
| fragments >15µm cm-3                    |
| fragments >160µm cm-2 yr-1              |
| fragments >180µm                        |
| fragments >180µm cm-2 yr-1              |
| fragments >180µm cm-3                   |
| fragments >180µm ml-1                   |
| fragments >1mm                          |
| fragments >200µm                        |
| fragments >200µm cm-3                   |
| fragments >20µm g-1*1000                |
| fragments >24µm                         |
| fragments >250µm                        |
| fragments >250µm cm-2 yr-1              |
| fragments >250µm cm-3                   |
| fragments >250µm ml-1                   |

|                                     |
|-------------------------------------|
| fragments >25cm-3                   |
| fragments >25µm                     |
| fragments >25µm %pollen sum         |
| fragments >25µm*0.1                 |
| fragments >30µm                     |
| fragments >30µm cm-2 yr-1           |
| fragments >35µm                     |
| fragments >37µm                     |
| fragments >40µm (concentration)     |
| fragments >500µm                    |
| fragments >500µm cm-2 yr-1          |
| fragments >50µm                     |
| fragments >53µm                     |
| fragments >5µm (concentration)      |
| fragments >5µm g-1                  |
| fragments >6µm                      |
| fragments >8µm ml-1                 |
| fragments 0-25µm ml-1               |
| fragments 0.5cm-3                   |
| fragments 10-100µm cm-2 yr-1        |
| fragments 10-100µm cm-3             |
| fragments 10-150µm cm-2 yr-1        |
| fragments 10-150µm ml-1             |
| fragments 10-160µm cm-2 yr-1        |
| fragments 100-150µm cm-2 yr-1       |
| fragments 100-150µm ml-1            |
| fragments 100-200µm (concentration) |
| fragments 12-20µm                   |
| fragments 120-250µm cm-2 yr-1       |
| fragments 125-250µm                 |
| fragments 125-250µm cm-2 yr-1       |
| fragments 125-250µm cm-3            |
| fragments 125-250µm ml-1            |
| fragments 14-24µm                   |
| fragments 150-500µm (concentration) |
| fragments 2-150µm cm-2 yr-1         |

|                                             |
|---------------------------------------------|
| fragments 20-60 $\mu$ m ml-1                |
| fragments 25-50 $\mu$ m (concentration)     |
| fragments 25-50 $\mu$ m ml-1                |
| fragments 30-100 $\mu$ m (concentration)    |
| fragments 30-100 $\mu$ m cm-2 yr-1          |
| fragments 38-63 $\mu$ m cm-2 yr-1           |
| fragments 5-50 $\mu$ m (concentration)      |
| fragments 50-100 $\mu$ m cm-2 yr-1          |
| fragments 50-100 $\mu$ m g-1                |
| fragments 50-100 $\mu$ m ml-1               |
| fragments 50-125 $\mu$ m g-1                |
| fragments 50-150 $\mu$ m cm-3               |
| fragments 50-250 $\mu$ m cm-3               |
| fragments abundance scale                   |
| fragments cm-2                              |
| fragments cm-2 g-1                          |
| fragments cm-2 yr-1                         |
| fragments cm-2 yr-1*100                     |
| fragments cm-3                              |
| fragments cm-3*1000                         |
| fragments g-1                               |
| fragments g-1 m-2 yr-1                      |
| fragments g-1 yr-1                          |
| fragments g-1*0.001                         |
| fragments ml-1                              |
| fragments:pollen (C:P ratio)                |
| fragments:pollen (C:P ratio) *1000          |
| fragments:pollen (C:P ratio) >20 $\mu$ m    |
| fragments:pollen (C:P ratio) 10-180 $\mu$ m |
| g-1 100g-1                                  |
| g-1 cm-2 yr-1                               |
| g-1 m-2 yr-1                                |
| mg-1 g-1                                    |
| mm-2                                        |
| mm-2 100g-1                                 |
| mm-2 cm-2 kyr-1                             |

|                                                           |
|-----------------------------------------------------------|
| mm-2 cm-2 yr-1                                            |
| mm-2 cm-3                                                 |
| mm-2 g-1                                                  |
| mm-2 ml-1                                                 |
| ordinal scale (Oz charcoal standardized)                  |
| other                                                     |
| Oxidation Resistant Elemental Carbon OREC % of dry weight |
| particles >125 μm cm-3                                    |
| parts per million                                         |
| point count <50μm cm-2 cm-3                               |
| point count >20μm cm-2 cm-3                               |
| point count >20μm cm-2 cm-3 *1000                         |
| point count >50μm                                         |
| point count cm-2 cm-3                                     |
| point count cm-3 yr-1                                     |
| point count mm-2 cm-3                                     |
| pollen concentration μm-2 (area:pollen ratio)             |
| presence absence                                          |
| Total Charcoal when multiple fragment size counts exist   |
| weight >2mm kg-1                                          |
| μm-1 cm-2 yr-1                                            |
| μm-2 cm-2 yr-1                                            |
| μm-2 cm-3                                                 |
| μm-2 g-1                                                  |
| μm-2 ml-1                                                 |

SI Figure 1. Summary of the stages used to select the optimum RBacon age models for from ageR. Plots A.-C. show the modelling output from ageR for an example entity from the RPD (Geral core), where the optimum age model selected by ageR A. is a table ranking the age model scenarios by the lowest area between the prior and posterior accumulation rate curves. Note that only the top 5 model scenarios of a total of 25 run for this entity are listed B. Shows the plots for the prior and posterior accumulation rates and the area between curves for the top 5 model scenarios. C. Is the top ranked RBacon age model (Accumulation rate = 15, thickness = 10) which was visually checked to verify that the interpolation through the dates was valid and consistent with the dates. In this example, the top ranked model scenario selected by ageR (Accumulation rate = 15, thickness= 10) was accepted as the chosen model scenario as the interpolation through the dates is valid.

A. Models ranked by AgeR using the area between prior and posterior accumulation rate curves (top 5 models of 25 shown)

| AgeR model ranking | acc. Rate | thickness | area between curves |
|--------------------|-----------|-----------|---------------------|
| 1                  | 15        | 10        | 0.1037              |
| 2                  | 15        | 15        | 0.1296              |
| 3                  | 15        | 20        | 0.1760              |
| 4                  | 15        | 30        | 0.2241              |
| 5                  | 15        | 40        | 0.4412              |

C. Final visual inspection of selected model to assess validity of interpolation against date information.

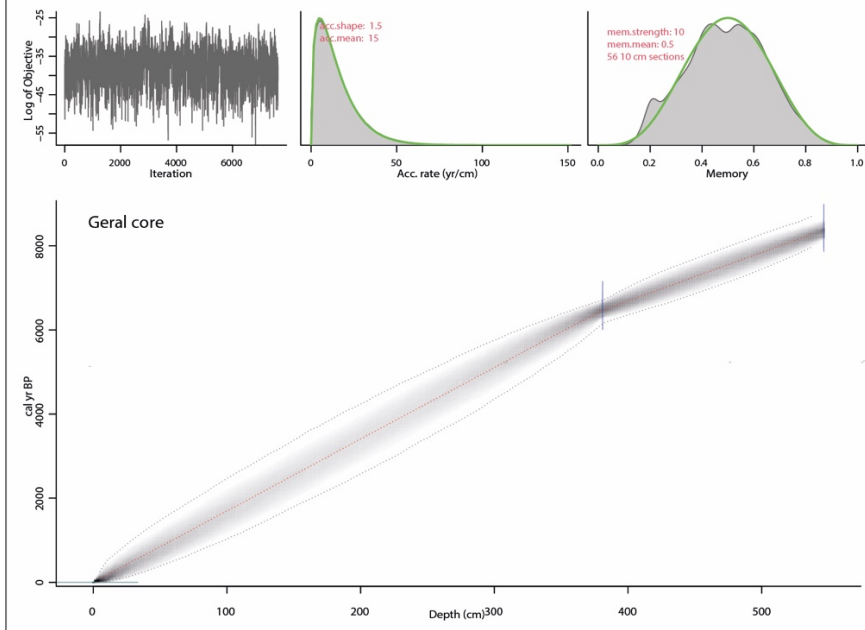

B. Plots showing the area between prior and posterior accumulation rate curves (abc).

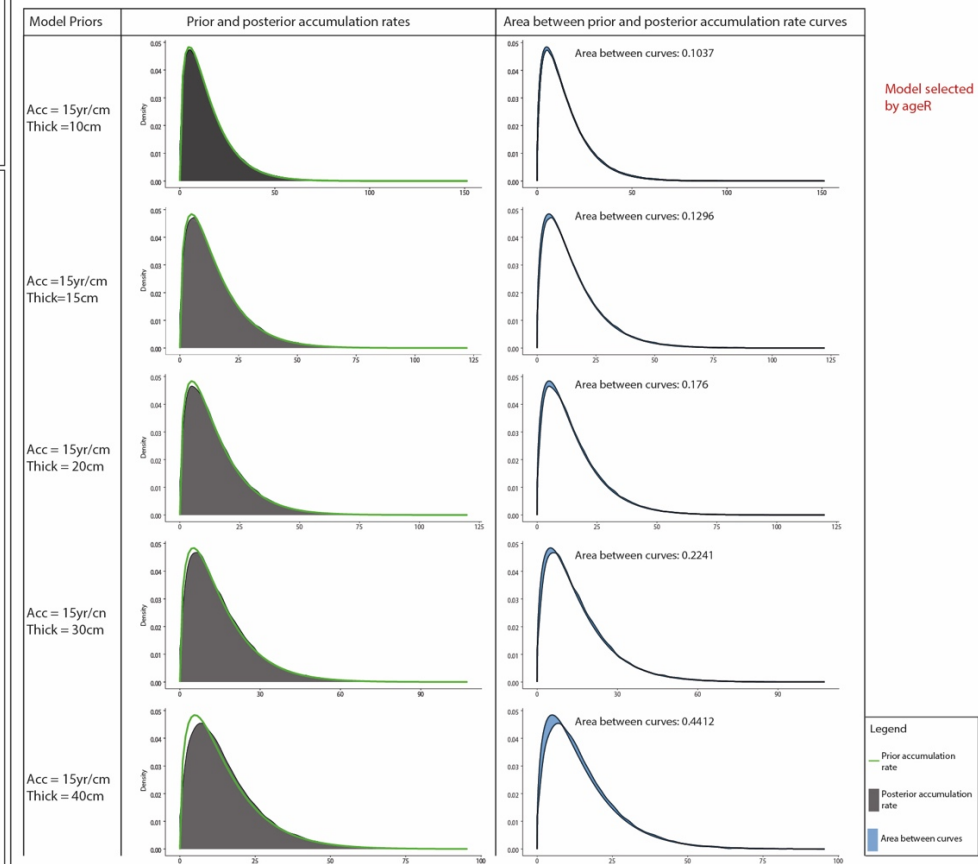

SI Figure 2. An example of alternative model scenario selection where the top ranked ageR model scenario is deemed to be inaccurate. In this example, the top ranked model scenario from King Tableland Swamp (accumulation rate = 45, thickness = 5)(A.) with the lowest area between the prior and posterior accumulation rate curves (B.) does not accurately represent the date at 157.5cm. This age was included by the original authors and lies in stratigraphic order with the other dates. Therefore, this model is rejected in favour of the model with the next lowest abc score which accurately reflects the dates included (ageR model ranking 3 in A.). The RBacon plot for this age model scenario is shown in D. (accumulation rate = 90, thickness = 5) and is more accurately and precisely modelled through the dates than the model selected by ageR.

A. Model scenarios ranked by AgeR using area between prior and posterior accumulation rate curves (top 5 models of 33 shown)

| AgeR model ranking | acc. Rate | thickness | abc    | Model selection  |
|--------------------|-----------|-----------|--------|------------------|
| 1                  | 45        | 5         | 0.1187 | ageR selection   |
| 2                  | 40        | 5         | 0.1319 |                  |
| 3                  | 90        | 5         | 0.1387 | manual selection |
| 4                  | 35        | 5         | 0.1581 |                  |
| 5                  | 60        | 5         | 0.1586 |                  |

B. abc in the scenario chosen by ageR (left) and the scenario manually selected

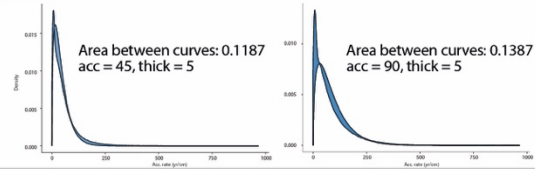

C. RBacon model for ageR selected model (acc=45, thick = 5).

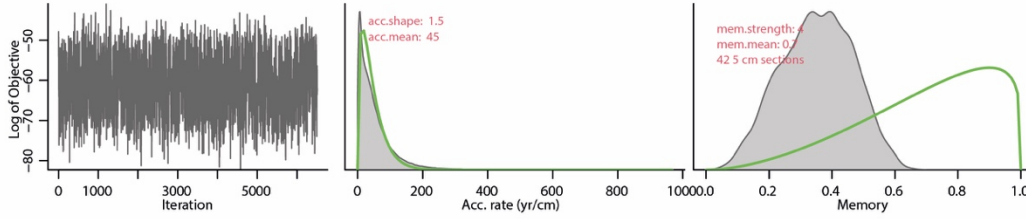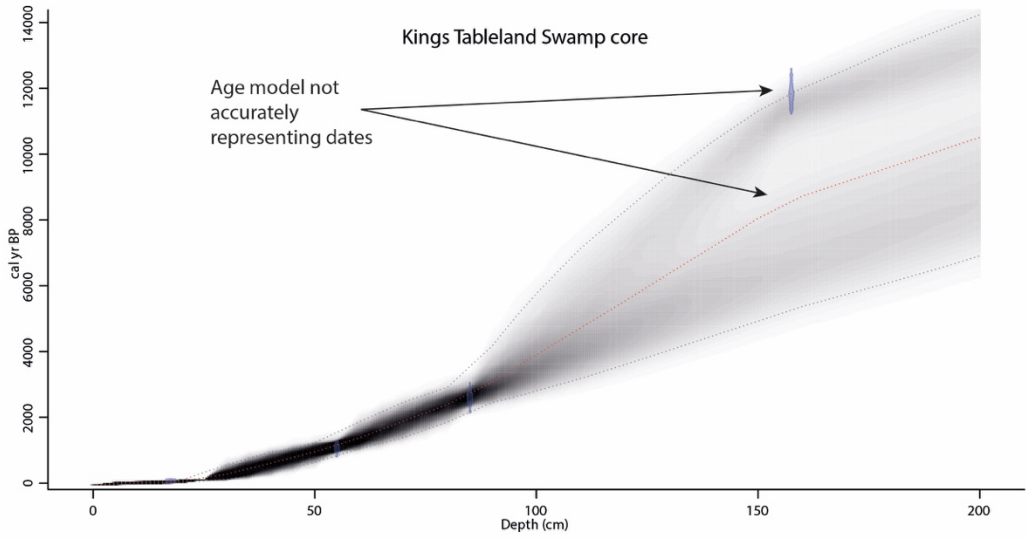

D. RBacon model for manually selected model (acc=90, thick = 5).

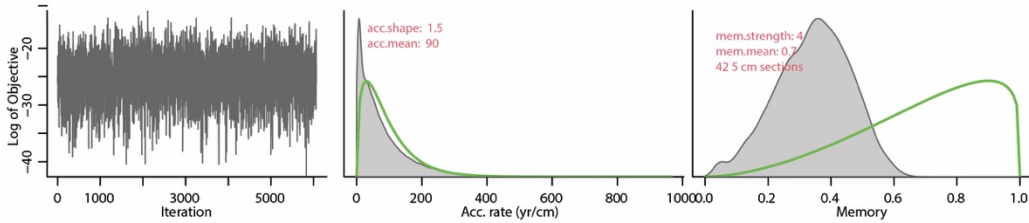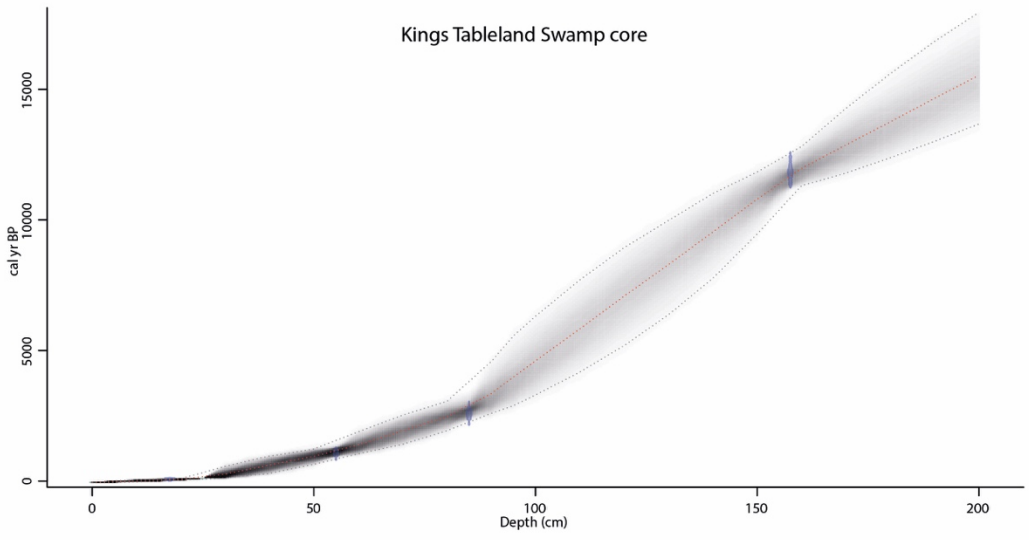



## Supplementary References

- Abarzúa, A.M., Moreno, P.I., 2008. Changing fire regimes in the temperate rainforest region of southern Chile over the last 16,000 yr. *Quaternary Research* 69, 62–71. <https://doi.org/10.1016/j.yqres.2007.09.004>
- Abel-Schaad, D., López-Sáez, J.A., 2012. Vegetation changes in relation to fire history and human activities at the Peña Negra mire (Bejar Range, Iberian Central Mountain System, Spain) during the past 4,000 years. *Vegetation History and Archaeobotany* 22, 199–214. <https://doi.org/10.1007/s00334-012-0368-9>
- Abraham, V., 2006. Přírozená vegetace a její změny v důsledku kolonizace a lesnického hospodaření v Českém Švýcarsku – The natural vegetation of Bohemian Switzerland and its changes as an impact of habitation and forest management (MSc thesis). Charles University, Prague, Czech Republic.
- Abraham, V., Pokorný, P., 2008. Vegetační změny v Českém Švýcarsku jako důsledek lesnického hospodaření – pokus o kvantitativní rekonstrukci (Vegetation changes in Czech Switzerland as a result of forestry management – An attempt at quantitative reconstruction on the basis of pollen analyses and historical sources), in: Beneš, J., Pokorný, P., Budějovice, C. (Eds.), *Bioarchaeologie v České Republice – Bioarchaeology in the Czech Republic*. Jihočeská univerzita v Českých Budějovicích, Archeologický ústav Akademie věd České republiky, Praha, Czech Republic, pp. 443–470. <https://doi.org/10.13140/RG.2.1.1742.8889>
- Abrook, A.M., Matthews, I.P., Milner, A.M., Candy, I., Palmer, A.P., Timms, R.G.O., 2020. Environmental variability in response to abrupt climatic change during the Last Glacial–Interglacial Transition (16–8 cal ka BP): evidence from Mainland, Orkney. *Scottish Journal of Geology* 56, 30–46. <https://doi.org/10.1144/sjg2019-006>
- Aitken, D.L., Kershaw, A.P., 1993. Holocene vegetation and environmental history of Cranbourne Botanic Garden, Victoria. *Proceedings of the Royal Society of Victoria* 67–80.
- Alba-Sánchez, F., López-Sáez, J.A., Abel-Schaad, D., Sabariego Ruiz, S., Pérez-Díaz, S., González-Hernández, A., Linares, J.C., 2019. The impact of climate and land-use changes on the most southerly fir forests (*Abies pinsapo*) in Europe. *The Holocene* 29, 1176–1188.
- Aleman, J.C., Blarquez, O., Bentaleb, I., Bonté, P., Brossier, B., Carcaillet, C., Gond, V., Gourlet-Fleury, S., Kpolita, A., Lefèvre, I., Oslisly, R., Power, M.J., Yongo, O., Bremond, L., Favier, C., 2013. Tracking land-cover changes with sedimentary charcoal in the Afrotropics. *The Holocene* 23, 1853–1862. <https://doi.org/10.1177/0959683613508159>
- Alenius, T., Grönlund, E., Simola, H., Saksala, A., 2004. Land-use history of Riekkalansaari Island in the northern archipelago of Lake Ladoga, Karelian Republic, Russia. *Vegetation History and Archaeobotany* 13, 23–31. <https://doi.org/10.1007/s00334-003-0030-7>
- Alenius, T., Mikkola, E., Ojala, A.E.K., 2007. History of agriculture in Mikkeli Orijärvi, eastern Finland as reflected by palynological and archaeological data. *Vegetation History and Archaeobotany* 17, 171–183. <https://doi.org/10.1007/s00334-007-0099-5>
- Alessio, M., Allegri, L., Bella, F., Calderoni, G., Cortesi, C., Dai Pra, G., de Rita, D., Esu, D., Follieri, M., Improta, S., Magri, D., Narcisi, B., Petrone, V., Sadori, L., 1986.  $^{14}\text{C}$  dating, geochemical features, faunistic and pollen analyses of the uppermost 10 m core from Valle di Castiglione (Rome, Italy). *Geologica Romana* 25, 287–308. <https://doi.org/10.1007/10013/epic.51621.d001>
- Ali, A.A., n.d. Unpublished data.
- Ali, A.A., Asselin, H., Larouche, A.C., Bergeron, Y., Carcaillet, C., Richard, P.J.H., 2008. Changes in fire regime explain the Holocene rise and fall of *Abies balsamea* in the coniferous forests of western Québec, Canada. *The Holocene* 18, 693–703. <https://doi.org/10.1177/0959683608091780>
- Ali, A.A., Blarquez, O., Girardin, M.P., Hély, C., Tinquaut, F., El-Guellab, A., Valsecchi, V., Terrier, A., Bremond, L., Genies, A., Gauthier, S., Bergeron, Y., 2012. Control of the multimillennial wildfire size

- in boreal North America by spring climatic conditions. *Proceedings of the National Academy of Sciences* 109, 20966–20970. <https://doi.org/10.1073/pnas.1203467109>
- Ali, A.A., Carcaillet, C., Bergeron, Y., 2009. Long-term fire frequency variability in the eastern Canadian boreal forest: the influences of climate vs. local factors. *Global Change Biology* 15, 1230–1241. <https://doi.org/10.1111/j.1365-2486.2009.01842.x>
- Allen, C.D., Anderson, R.S., Brunner Jass, R.M., Toney, J.L., Baisan, C.H., 2008. Paired charcoal and tree-ring records of high-frequency Holocene fire from two New Mexico bog sites. *International Journal of Wildland Fire* 17, 115–130. <https://doi.org/10.1071/wf07165>
- Alloway, B.V., Moreno, P.I., Pearce, N.J.G., De Pol-Holz, R., Henríquez, W.I., Pesce, O.H., Sagredo, E., Villarosa, G., Outes, V., 2017. Stratigraphy, age and correlation of Lepué Tephra: a widespread c. 11 000 cal a BP marker horizon sourced from the Chaitén Sector of southern Chile. *Journal of Quaternary Science* 32, 795–829. <https://doi.org/10.1002/jqs.2976>
- Almquist-Jacobson, H., 1994. Interaction of the Holocene Climate, Water Balance, Vegetation, and Fire, and the Cultural Land-Use in Swedish Borderland (MSc thesis). Lund University, Lund, Sweden.
- Almquist-Jacobson, H., Sanger, D., 1995. Holocene climate and vegetation in the Milford drainage basin, Maine, U.S.A., and their implications for human history. *Vegetation History and Archaeobotany* 4, 211–222. <https://doi.org/10.1007/bf00235752>
- Ammann, B., 1989. Late-Quaternary palynology at Lobsigensee: regional vegetation history and local lake development. *Dissertationes Botanicae* 137, 1–157.
- Amon, L., Veski, S., Heinsalu, A., Saarse, L., 2011. Timing of Lateglacial vegetation dynamics and respective palaeoenvironmental conditions in southern Estonia: evidence from the sediment record of Lake Nakri. *Journal of Quaternary Science* 27, 169–180. <https://doi.org/10.1002/jqs.1530>
- Anchukaitis, K.J., Horn, S.P., 2005. A 2000-year reconstruction of forest disturbance from southern Pacific Costa Rica. *Palaeogeography, Palaeoclimatology, Palaeoecology* 221, 35–54. <https://doi.org/10.1016/j.palaeo.2005.02.003>
- Anderson, L., Abbott, M.B., Finney, B.P., Edwards, M.E., 2005. Palaeohydrology of the Southwest Yukon Territory, Canada, based on multiproxy analyses of lake sediment cores from a depth transect. *The Holocene* 15, 1172–1183. <https://doi.org/10.1191/0959683605hl889rp>
- Anderson, L., Edwards, M.E., Shapley, M.D., Finney, B.P., Langdon, C., 2019. Holocene thermokarst lake dynamics in northern interior Alaska: the interplay of climate, fire, and subsurface hydrology. *Frontiers in Earth Science* 7. <https://doi.org/10.3389/feart.2019.00053>
- Anderson, R.S., n.d. Unpublished data.
- Anderson, R.S., 2005. Contrasting vegetation and fire histories on the Point Reyes Peninsula during the pre-settlement and settlement periods. Final report to the Point Reyes National Seashore, National Park Service.
- Anderson, R.S., Allen, C.D., Toney, J.L., Brunner Jass, R.M., Bair, A.N., 2008. Holocene vegetation and fire regimes in subalpine and mixed conifer forests, southern Rocky Mountains, USA. *International Journal of Wildland Fire* 17, 96. <https://doi.org/10.1071/wf07028>
- Anderson, R.S., Brunner Jass, R.M., Toney, J.L., Allen, C.D., Cisneros-Dozal, L.M., Hess, M., Heikoop, J., Fessenden, J., 2008. Development of the mixed conifer forest in northern New Mexico and its relationship to Holocene environmental change. *Quaternary Research* 69, 263–275. <https://doi.org/10.1016/j.yqres.2007.12.002>
- Anderson, R.S., Hallett, D.J., Berg, E., Brunner Jass, R.M., Toney, J.L., de Fontaine, C.S., DeVolder, A., 2006. Holocene development of boreal forests and fire regimes on the Kenai Lowlands of Alaska. *The Holocene* 16, 791–803. <https://doi.org/10.1191/0959683606hol966rp>
- Anderson, R.S., Jiménez-Moreno, G., Carrión, J.S., Pérez-Martínez, C., 2011. Postglacial history of alpine vegetation, fire, and climate from Laguna de Río Seco, Sierra Nevada, southern Spain. *Quaternary Science Reviews* 30, 1615–1629. <https://doi.org/10.1016/j.quascirev.2011.03.005>

- Andreev, A.A., Pierau, R., Kalugin, I.A., Daryin, A.V., Smolyaninova, L.G., Diekmann, B., 2007. Environmental changes in the northern Altai during the last millennium documented in Lake Teletskoye pollen record. *Quaternary Research* 67, 394–399. <https://doi.org/10.1016/j.yqres.2006.11.004>
- Andrič, M., n.d. Unpublished data.
- Andrič, M., 2011. Poznoglacialna vegetacija v okolici Blejskega jezera in Gribelj (Bela krajina): primerjava v zadnjem stadialu poledenele in nepoledenele pokrajine. Lateglacial vegetation at Lake Bled and Griblje Marsh (Slovenia): a comparison of (in Last Glacial Maximum) glaciated and non-glaciated landscapes, in: Drobci Ledenodobnega Okolja: Zbornik Ob Življenjskem Jubileju Ivana Turka - Proceedings in Honour of Ivan Turk's Jubilee. Opera Instituti Archaeologici Sloveniae - Inštitut za arheologijo ZRC SAZU, Ljubljana, pp. 235–249.
- Andrič, M., 2007. Holocene vegetation development in Bela krajina (Slovenia) and the impact of first farmers on the landscape. *The Holocene* 17, 763–776. <https://doi.org/10.1177/0959683607080516>
- Andrič, M., 2006a. Ali lahko analiza pelodnega zapisa v kulturni plasti arheološkega najdišča pove, kakšna vegetacija je rasla v okolici? Primer: Resnikov prekop – Does pollen record in archaeological 'cultural layer' tell us what vegetation was growing around the settlement? Case study: 'Resnikov Prekop', in: Velušček, A. (Ed.), Resnikov prekop. Najstarejša koliščarska naselbina na Ljubljanskem barju – The oldest pile-dwelling settlement in the Ljubljansko barje. Opera Instituti Archaeologici Sloveniae - Inštitut za arheologijo ZRC SAZU, pp. 103–113. <https://doi.org/10.3986/9789612545154>
- Andrič, M., 2006b. Prapoče pollen core and Holocene vegetation change in northern Istria, in: Prehistoric Herders in Istria (Croatia): the Archaeology of Pupičina Cave, Monografije I Katalozi - Arheološki Muzej Istre. Archaeological Museum of Istria. Arheološki muzej Istre, Pula, pp. 31–62.
- Andrič, M., 2004. Paleokolje v Sloveniji in severnemu delu hrvaške Istre poznih prazgodovini. The vegetation of Slovenia and northern Istria in late prehistory. *Arheološki vestnik* 55, 509–525.
- Andrič, M., Kroflič, B., Toman, M.J., Ogrinc, N., Dolenc, T., Dobnikar, M., Čermelj, B., 2008. Late Quaternary vegetation and hydrological change at Ljubljansko barje (Slovenia). *Palaeogeography, Palaeoclimatology, Palaeoecology* 270, 150–165. <https://doi.org/10.1016/j.palaeo.2008.09.008>
- Andrič, M., Massaferrero, J., Eicher, U., Ammann, B., Leuenberger, M.C., Martinčič, A., Marinova, E., Brancelj, A., 2009. A multi-proxy Late-glacial palaeoenvironmental record from Lake Bled, Slovenia. *Hydrobiologia* 631, 121–141. <https://doi.org/10.1007/s10750-009-9806-9>
- Andrič, M., Willis, K.J., 2003. The phytogeographical regions of Slovenia: a consequence of natural environmental variation or prehistoric human activity? *Journal of Ecology* 91, 807–821.
- Anker, S.A., Colhoun, E.A., Barton, C.E., Peterson, M., Barbetti, M., 2001. Holocene vegetation and paleoclimatic and paleomagnetic history from Lake Johnston, Tasmania. *Quaternary Research* 56, 264–274. <https://doi.org/10.1006/qres.2001.2233>
- Anshari, G., Kershaw, A.P., van der Kaars, S., 2001. A Late Pleistocene and Holocene pollen and charcoal record from peat swamp forest, Lake Sentarum Wildlife Reserve, west Kalimantan, Indonesia. *Palaeogeography, Palaeoclimatology, Palaeoecology* 171, 213–228. [https://doi.org/10.1016/s0031-0182\(01\)00246-2](https://doi.org/10.1016/s0031-0182(01)00246-2)
- Apolinarska, K., Woszczyk, M., Obremaska, M., 2012. Late Weichselian and Holocene palaeoenvironmental changes in northern Poland based on the Lake Skrzyńka record. *Boreas* 41, 292–307. <https://doi.org/10.1111/j.1502-3885.2011.00235.x>
- Asnong, H., 2000. Histoire Postglaciaire de la Végétation, des Feux et des Niveaux Lacustres en Gaspésie, Québec (MSc thesis). Département de Géographie, Université de Montréal, Montréal, Canada.
- Asnong, H., Richard, P.J.H., 2003. La végétation et le climat postglaciaires du centre et de l'est de la Gaspésie, au Québec. *Géographie physique et Quaternaire* 57, 37–63. <https://doi.org/10.7202/010330ar>
- Atanassova, J., Stefanova, I., 2005. Studien zur jüngeren postglazialen vegetations- und siedlungsgeschichte im östlichen Schleswig-Holstein. *Geologica Carpathica* 56, 447–453.

- Athens, J.S., Ward, J.V., 2005. Palau Compact Road Archaeological Investigations, Babeldaob Island, Republic of Palau.
- Athens, J.S., Ward, J.V., 1999. The Late Quaternary of the Western Amazon: climate, vegetation and humans. *Antiquity* 73, 287–302. <https://doi.org/10.1017/s0003598x00088256>
- Atherden, M.A., Hall, J.A., 1999. Human impact on vegetation in the White Mountains of Crete since AD 500. *The Holocene* 9, 183–193. <https://doi.org/10.1191/095968399673523574>
- Aucour, A.-M., Hillaire-Marcel, C., Bonnefille, R., 1994. Late Quaternary biomass changes from <sup>13</sup>C measurements in a highland peatbog from Equatorial Africa (Burundi). *Quaternary Research* 41, 225–233. <https://doi.org/10.1006/qres.1994.1024>
- Avnery, S., Dull, R.A., Keitt, T.H., 2011. Human versus climatic influences on late-Holocene fire regimes in southwestern Nicaragua. *The Holocene* 21, 699–706. <https://doi.org/10.1177/0959683610391314>
- Axelsson, 1995. Unpublished MS thesis.
- Åkesson, C.M., McMichael, C.N.H., Raczka, M.F., Huisman, S.N., Palmeira, M., Vogel, J., Neill, D., Veizaj, J., Bush, M.B., 2021. Long-term ecological legacies in western Amazonia. *Journal of Ecology* 109, 432–446. <https://doi.org/10.1111/1365-2745.13501>
- Bair, A.N., 2004. A 15,000 Year Vegetation and Fire History Record from the Southern Sangre de Cristo Mountains of Northern New Mexico (MSc thesis). Northern Arizona University, Flagstaff, Arizona, USA.
- Bal, M.-C., Pelachs, A., Perez-Obiol, R., Julia, R., Cunill, R., 2011. Fire history and human activities during the last 3300 cal yr BP in Spain's Central Pyrenees: The case of the Estany de Burg. *Palaeogeography, Palaeoclimatology, Palaeoecology* 300, 179–190. <https://doi.org/10.1016/j.palaeo.2010.12.023>
- Balbo, A.L., n.d. Unpublished data.
- Balbo, A.L., Andrič, M., Rubinić, J., Moscariello, A., Miracle, P.T., 2006. Palaeoenvironmental and archaeological implications of a sediment core from Polje Čepić, Istria, Croatia. *Geologia Croatica* 59, 109–124.
- Ballard, J., 2009. A Lateglacial Paleofire Record for East-central Michigan (MSc thesis). University of Cincinnati, Cincinnati, Ohio, USA.
- Barber, K.E., Chambers, F.M., Maddy, D., 2003. Holocene palaeoclimates from peat stratigraphy: macrofossil proxy climate records from three oceanic raised bogs in England and Ireland. *Quaternary Science Reviews* 22, 521–539. [https://doi.org/10.1016/S0277-3791\(02\)00185-3](https://doi.org/10.1016/S0277-3791(02)00185-3)
- Barber, V.A., Finney, B.P., 2000. Late Quaternary paleoclimatic reconstructions for interior Alaska based on paleolake-level data and hydrologic models. *Journal of Paleolimnology* 24, 29–41. <https://doi.org/10.1023/A:1008113715703>
- Bard, E., Ménot, G., Rostek, F., Licari, L., Böning, P., Edwards, R.L., Cheng, H., Wang, Y., Heaton, T.J., 2013. Radiocarbon calibration/comparison records based on marine sediments from the Pakistan and Iberian margins. *Radiocarbon* 55, 1999–2019. [https://doi.org/10.2458/azu\\_js\\_rc.55.17114](https://doi.org/10.2458/azu_js_rc.55.17114)
- Barhoumi, C., Peyron, O., Joannin, S., Subetto, D., Kryshen, A., Drobyshev, I., Girardin, M.P., Brossier, B., Paradis, L., Pastor, T., Alleaume, S., Ali, A.A., 2019. Gradually increasing forest fire activity during the Holocene in the northern Ural region (Komi Republic, Russia). *The Holocene* 29, 1906–1920. <https://doi.org/10.1177/0959683619865593>
- Barrett, C.M., Kelly, R., Higuera, P.E., Hu, F.S., 2013. Climatic and land cover influences on the spatiotemporal dynamics of Holocene boreal fire regimes. *Ecology* 94, 389–402. <https://doi.org/10.1890/12-0840.1>
- Beaudoin, A.B., 1984. Holocene Environmental Change in the Sunwapta Pass Area, Jasper National Park (PhD thesis). University of Western Ontario, London, Ontario, Canada.
- Beaudoin, A.B., King, R.H., 1990. Late Quaternary vegetation history of Wilcox Pass, Jasper National Park, Alberta. *Palaeogeography, Palaeoclimatology, Palaeoecology* 80, 129–144. [https://doi.org/10.1016/0031-0182\(90\)90125-q](https://doi.org/10.1016/0031-0182(90)90125-q)



- Beaudoin, A.B., King, R.H., 1986. Using discriminant function analysis to identify Holocene tephras based on magnetite composition: a case study from the Sunwapta Pass area, Jasper National Park. *Canadian Journal of Earth Sciences* 23, 804–812. <https://doi.org/10.1139/e86-082>
- Beaulne, J., Garneau, M., Magnan, G., Boucher, 2021. Peat deposits store more carbon than trees in forested peatlands of the boreal biome. *Scientific Reports* 11, 1–11. <https://doi.org/10.1038/s41598-021-82004-x>
- Beer, R., n.d. Unpublished data.
- Beer, R., Tinner, W., 2008. Four thousand years of vegetation and fire history in the spruce forests of northern Kyrgyzstan (Kungey Alatau, Central Asia). *Vegetation History and Archaeobotany* 17, 629–638. <https://doi.org/10.1007/s00334-008-0142-1>
- Behling, H., 2007. Late Quaternary vegetation, fire and climate dynamics of Serra do Araçatuba in the Atlantic coastal mountains of Paraná State, southern Brazil. *Vegetation History and Archaeobotany* 16, 77–85. <https://doi.org/10.1007/s00334-006-0078-2>
- Behling, H., 2003. Late Glacial and Holocene vegetation, climate and fire history inferred from Lagoa Nova in the southeastern Brazilian lowland. *Vegetation History and Archaeobotany* 12, 263–270. <https://doi.org/10.1007/s00334-003-0020-9>
- Behling, H., 2001. Late Quaternary environmental changes in the Lagoa da Curuçã region (eastern Amazonia, Brazil) and evidence of Podocarpus in the Amazon lowland. *Vegetation History and Archaeobotany* 10, 175–183. <https://doi.org/10.1007/PL00006929>
- Behling, H., 2000. A 2860-year high-resolution pollen and charcoal record from the Cordillera de Talamanca in Panama: a history of human and volcanic forest disturbance. *The Holocene* 10, 387–393. <https://doi.org/10.1191/095968300668797683>
- Behling, H., 1997a. Late Quaternary vegetation, climate and fire history from the tropical mountain region of Morro de Itapeva, SE Brazil. *Palaeogeography, Palaeoclimatology, Palaeoecology* 129, 407–422. [https://doi.org/10.1016/s0031-0182\(97\)88177-1](https://doi.org/10.1016/s0031-0182(97)88177-1)
- Behling, H., 1997b. Late Quaternary vegetation, climate and fire history of the Araucaria forest and campos region from Serra Campos Gerais, Paraná State (South Brazil). *Review of Palaeobotany and Palynology* 97, 109–121. [https://doi.org/10.1016/s0034-6667\(96\)00065-6](https://doi.org/10.1016/s0034-6667(96)00065-6)
- Behling, H., 1995. A high resolution Holocene pollen record from Lago do Pires, SE Brazil: vegetation, climate and fire history. *Journal of Paleolimnology* 14, 253–268. <https://doi.org/10.1007/BF00682427>
- Behling, H., da Costa, M.L., 2001. Holocene vegetational and coastal environmental changes from the Lago Crispim record in northeastern Pará State, eastern Amazonia. *Review of Palaeobotany and Palynology* 114, 145–155. [https://doi.org/10.1016/S0034-6667\(01\)00044-6](https://doi.org/10.1016/S0034-6667(01)00044-6)
- Behling, H., da Costa, M.L., 2000. Holocene environmental changes from the Rio Curuá record in the Caxiuanã region, eastern Amazon Basin. *Quaternary Research* 53, 369–377. <https://doi.org/10.1006/qres.1999.2117>
- Behling, H., Dupont, L., Safford, H.D., Wefer, G., 2007. Late Quaternary vegetation and climate dynamics in the Serra da Bocaina, southeastern Brazil. *Quaternary International* 161, 22–31. <https://doi.org/10.1016/j.quaint.2006.10.021>
- Behling, H., Girardi Bauermann, S., Pereira Neves, P.C., 2001. Holocene environmental changes in the São Francisco de Paula region, southern Brazil. *Journal of South American Earth Sciences* 14, 631–639. [https://doi.org/10.1016/S0895-9811\(01\)00040-2](https://doi.org/10.1016/S0895-9811(01)00040-2)
- Behling, H., Jantz, N., Safford, H.D., 2020. Mid-and late Holocene vegetation, climate and fire dynamics in the Serra do Itatiaia, Rio de Janeiro State, southeastern Brazil. *Review of Palaeobotany and Palynology* 274, 104152. <https://doi.org/10.1016/j.revpalbo.2019.104152>
- Behling, H., Lichte, M., 1997. Evidence of dry and cold climatic conditions at glacial times in tropical southeastern Brazil. *Quaternary Research* 48, 348–358. <https://doi.org/10.1006/qres.1997.1932>

- Behling, H., Pillar, V.D., Girardi Bauermann, S., 2005. Late Quaternary grassland (Campos), gallery forest, fire and climate dynamics, studied by pollen, charcoal and multivariate analysis of the São Francisco de Assis core in western Rio Grande do Sul (southern Brazil). *Review of Palaeobotany and Palynology* 133, 235–248. <https://doi.org/10.1016/j.revpalbo.2004.10.004>
- Behling, H., Pillar, V.D., Orlóci, L., Girardi Bauermann, S., 2004. Late Quaternary Araucaria forest, grassland (Campos), fire and climate dynamics, studied by high-resolution pollen, charcoal and multivariate analysis of the Cambará do Sul core in southern Brazil. *Palaeogeography, Palaeoclimatology, Palaeoecology* 203, 277–297. [https://doi.org/10.1016/s0031-0182\(03\)00687-4](https://doi.org/10.1016/s0031-0182(03)00687-4)
- Bennett, K.D., Boreham, S., Sharp, M.J., Switsur, V.R., 1992. Holocene history of environment, vegetation and human settlement on Catta Ness, Lunnasting, Shetland. *The Journal of Ecology* 80, 241–273. <https://doi.org/10.2307/2261010>
- Benson, L.V., Mensing, S.A., n.d. Unpublished data.
- Berrío, J.C., Hooghiemstra, H., Marchant, R., Rangel, O., 2002. Late-glacial and Holocene history of the dry forest area in the south Colombian Cauca Valley. *Journal of Quaternary Science* 17, 667–682. <https://doi.org/10.1002/jqs.701>
- Beuning, K.R.M., Talbot, M.R., Kelts, K., 1997. A revised 30,000-year paleoclimatic and paleohydrologic history of Lake Albert, East Africa. *Palaeogeography, Palaeoclimatology, Palaeoecology* 136, 259–279. [https://doi.org/10.1016/s0031-0182\(97\)00034-5](https://doi.org/10.1016/s0031-0182(97)00034-5)
- Bhattacharya, T., Byrne, R., 2016. Late Holocene anthropogenic and climatic influences on the regional vegetation of Mexico's Cuenca Oriental. *Global and Planetary Change* 138, 56–69. <https://doi.org/10.1016/j.gloplacha.2015.12.005>
- Bigler, C., Larocque, I., Peglar, S.M., Birks, H.J.B., Hall, R.I., 2002. Quantitative multiproxy assessment of long-term patterns of Holocene environmental change from a small lake near Abisko, northern Sweden. *The Holocene* 12, 481–496. <https://doi.org/10.1191/0959683602h1559rp>
- Bird, M.I., Cali, J.A., 2002. A revised high-resolution oxygen-isotope chronology for ODP-668B: implications for Quaternary biomass burning in Africa. *Global and Planetary Change* 33, 73–76. [https://doi.org/10.1016/s0921-8181\(02\)00062-0](https://doi.org/10.1016/s0921-8181(02)00062-0)
- Birks, H.H., Birks, H.J.B., Bjune, A.E., Felde, V.A., 2012. Internal report. XXXVI international bog ('moor') excursion of the Institute of Plant Sciences, University of Bern, southern and south-eastern Norway, 8-13 September 2012, Excursion Guide. Bjerknes Centre for Climate Research, University of Bergen, Bergen, Norway.
- Birks, H.J.B., 2006. Estimating the amount of compositional change in late-Quaternary pollen-stratigraphical data. *Vegetation History and Archaeobotany* 16, 197–202. <https://doi.org/10.1007/s00334-006-0079-1>
- Bisculm, M., Colombaroli, D., Vescovi, E., van Leeuwen, J.F.N., Henne, P.D., Rothen, J., Procacci, G., Pasta, S., La Mantia, T., Tinner, W., 2012. Holocene vegetation and fire dynamics in the supra-mediterranean belt of the Nebrodi Mountains (Sicily, Italy). *Journal of Quaternary Science* 27, 687–698. <https://doi.org/10.1002/jqs.2551>
- Bjerring, R., Olsen, J., Jeppesen, E., Buchardt, B., Heinemeier, J., McGowan, S., Leavitt, P.R., Enevold, R., Odgaard, B.V., 2012. Climate-driven changes in water level: a decadal scale multi-proxy study recording the 8.2-ka event and ecosystem responses in Lake Sarup (Denmark). *Journal of Paleolimnology* 49, 267–285. <https://doi.org/10.1007/s10933-012-9673-7>
- Björkman, L., Feurdean, A., Wohlfarth, B., 2003. Late-glacial and Holocene forest dynamics at Steregoiu in the Gutaiului Mountains, Northwest Romania. *Review of Palaeobotany and Palynology* 124, 79–111. [https://doi.org/10.1016/S0034-6667\(02\)00249-X](https://doi.org/10.1016/S0034-6667(02)00249-X)
- Bjune, A.E., 2005. Holocene vegetation history and tree-line changes on a north–south transect crossing major climate gradients in southern Norway—evidence from pollen and plant macrofossils in lake sediments. *Review of Palaeobotany and Palynology* 133, 249–275. <https://doi.org/10.1016/j.revpalbo.2004.10.005>

- Bjune, A.E., Bakke, J., Nesje, A., Birks, H.J.B., 2005. Holocene mean July temperature and winter precipitation in western Norway inferred from palynological and glaciological lake-sediment proxies. *The Holocene* 15, 177–189. <https://doi.org/10.1191/0959683605hl798rp>
- Bjune, A.E., Birks, H.J.B., Seppä, H., 2004. Holocene vegetation and climate history on a continental-oceanic transect in northern Fennoscandia based on pollen and plant macrofossils. *Boreas* 33, 211–223. <https://doi.org/10.1080/03009480410001244>
- Bjune, A.E., Seppä, H., Birks, H.J.B., 2008. Quantitative summer-temperature reconstructions for the last 2000 years based on pollen-stratigraphical data from northern Fennoscandia. *Journal of Paleolimnology* 41, 43–56. <https://doi.org/10.1007/s10933-008-9254-y>
- Black, M.P., 2001. Fire, vegetation, humans and climate: A record of change during the past millennium from the Kings Tablelands (BSc (Hons) thesis). School of Geography, University of New South Wales, Sydney, Australia.
- Black, M.P., Mooney, S.D., 2006. Holocene fire history from the Greater Blue Mountains World Heritage Area, New South Wales, Australia: the climate, humans and fire nexus. *Regional Environmental Change* 6, 41–51. <https://doi.org/10.1007/s10113-005-0003-8>
- Black, M.P., Mooney, S.D., Martin, H.A., 2006. A >43,000-year vegetation and fire history from Lake Baraba, New South Wales, Australia. *Quaternary Science Reviews* 25, 3003–3016. <https://doi.org/10.1016/j.quascirev.2006.04.006>
- Blarquez, O., Ali, A.A., Girardin, M.P., Grondin, P., Fréchette, B., Bergeron, Y., Hély, C., 2015. Regional paleofire regimes affected by non-uniform climate, vegetation and human drivers. *Scientific Reports* 5, 1–13. <https://doi.org/10.1038/srep13356>
- Blarquez, O., Bremond, L., Carcaillet, C., 2010. Holocene fires and a herb-dominated understorey track wetter climates in subalpine forests. *Journal of Ecology* 98, 1358–1368. <https://doi.org/10.1111/j.1365-2745.2010.01721.x>
- Blarquez, O., Talbot, J., Paillard, J., Lapointe-Elmrabti, L., Pelletier, N., St-Pierre, C.G., 2018. Late Holocene influence of societies on the fire regime in southern Québec temperate forests. *Quaternary Science Reviews* 180, 63–74. <https://doi.org/10.1016/j.quascirev.2017.11.022>
- Blyakharchuk, T.A., n.d. Unpublished data.
- Blyakharchuk, T.A., Eirikh, A., Mitrofanova, E., Li, H.-C., Kang, S.-C., 2017. High resolution palaeoecological records for climatic and environmental changes during the last 1350 years from Manzherok Lake, western foothills of the Altai Mountains, Russia. *Quaternary International* 447, 59–74. <https://doi.org/10.1016/j.quaint.2017.06.014>
- Blyakharchuk, T.A., Kurina, I.V., Pologova, N.N., 2019. Late-Holocene dynamics of vegetation cover and humidity of climate in the southeastern sector of the West Siberian Plain according to the data of palynological and rhizopod research of peat deposits. *Tomsk State University Journal of Biology* 45, 164–189. <https://doi.org/10.17223/19988591/45/9>
- Blyakharchuk, T.A., Prikhodko, V., Kilunovskaya, M., Li, H.-C., 2019. Vegetation and climate reconstruction based on pollen and microbial records derived from burial mounds soil in Tuva Republic, Central Asia. *Quaternary International* 507, 108–123. <https://doi.org/10.1016/j.quaint.2018.09.028>
- Blyakharchuk, T.A., Wright, H.E., Borodavko, P.S., van der Knaap, W.O., Ammann, B., 2007. Late Glacial and Holocene vegetational history of the Altai Mountains (southwestern Tuva Republic, Siberia). *Palaeogeography, Palaeoclimatology, Palaeoecology* 245, 518–534. <https://doi.org/10.1016/j.palaeo.2006.09.010>
- Blyakharchuk, T.A., Wright, H.E., Borodavko, P.S., van der Knaap, W.O., Ammann, B., 2004. Late Glacial and Holocene vegetational changes on the Ulagan high-mountain plateau, Altai Mountains, southern Siberia. *Palaeogeography, Palaeoclimatology, Palaeoecology* 209, 259–279. <https://doi.org/10.1016/j.palaeo.2004.02.011>

- Bobek, P., Svobodová, H.S., Werchan, B., Švarcová, M.G., Kuneš, P., 2017. Human-induced changes in fire regime and subsequent alteration of the sandstone landscape of Northern Bohemia (Czech Republic). *The Holocene* 28, 427–443. <https://doi.org/10.1177/0959683617729443>
- Bobek, P., Svobodová-Svitavská, H., Pokorný, P., Šamonil, P., Kuneš, P., Kozáková, R., Abraham, V., Klinerová, T., Švarcová, M.G., Jamrichová, E., Krauseová, E., Wild, J., 2019. Divergent fire history trajectories in Central European temperate forests revealed a pronounced influence of broadleaved trees on fire dynamics. *Quaternary Science Reviews* 222, 105865. <https://doi.org/10.1016/j.quascirev.2019.105865>
- Bobek, P., Šamonil, P., Jamrichová, E., 2018. Biotic controls on Holocene fire frequency in a temperate mountain forest, Czech Republic. *Journal of Quaternary Science* 33, 892–904. <https://doi.org/10.1002/jqs.3067>
- Bonnefille, R., Riollet, G., Buchet, G., Icole, M., Lafont, R., Arnold, M., Jolly, D., 1995. Glacial/Interglacial record from intertropical Africa, high resolution pollen and carbon data at Rusaka, Burundi. *Quaternary Science Reviews* 14, 917–936. [https://doi.org/10.1016/0277-3791\(95\)00071-2](https://doi.org/10.1016/0277-3791(95)00071-2)
- Boyd, W.E., 1990. Quaternary pollen analysis in the arid zone of Australia: Dalhousie Springs, Central Australia. *Review of Palaeobotany and Palynology* 64, 331–341. [https://doi.org/10.1016/0034-6667\(90\)90149-d](https://doi.org/10.1016/0034-6667(90)90149-d)
- Bradshaw, E.G., Rasmussen, P., Odgaard, B.V., 2005. Mid-to late-Holocene land-use change and lake development at Dallund So, Denmark: synthesis of multiproxy data, linking land and lake. *The Holocene* 15, 1152–1162. <https://doi.org/10.1191/0959683605hl887rp>
- Bradshaw, R.H.W., Zackrisson, O., 1990. A two thousand year history of a northern Swedish boreal forest stand. *Journal of Vegetation Science* 1, 519–528. <https://doi.org/10.2307/3235786>
- Briles, C.E., Whitlock, C., Bartlein, P.J., 2005. Postglacial vegetation, fire, and climate history of the Siskiyou Mountains, Oregon, USA. *Quaternary Research* 64, 44–56. <https://doi.org/10.1016/j.yqres.2005.03.001>
- Briles, C.E., Whitlock, C., Bartlein, P.J., Higuera, P.E., 2008. Regional and local controls on postglacial vegetation and fire in the Siskiyou Mountains, northern California, USA. *Palaeogeography, Palaeoclimatology, Palaeoecology* 265, 159–169. <https://doi.org/10.1016/j.palaeo.2008.05.007>
- Briles, C.E., Whitlock, C., Skinner, C.N., Mohr, J., 2011. Holocene forest development and maintenance on different substrates in the Klamath Mountains, northern California, USA. *Ecology* 92, 590–601. <https://doi.org/10.1890/09-1772.1>
- Brown, A.G., Hatton, J., O'Brien, C.E., Selby, K.A., Langdon, P.G., Stuijts, I., Caseldine, C.J., 2005. Vegetation, landscape and human activity in Midland Ireland: mire and lake records from the Lough Kinale-Derragh Lough area, central Ireland. *Vegetation History and Archaeobotany* 14, 81–98. <https://doi.org/10.1007/s00334-005-0063-1>
- Brown, K.J., Clark, J.S., Grimm, E.C., Donovan, J.J., Mueller, P.G., Hansen, B.C.S., Stefanova, I., 2005. Fire cycles in North American interior grasslands and their relation to prairie drought. *Proceedings of the National Academy of Sciences* 102, 8865–8870. <https://doi.org/10.1073/pnas.0503621102>
- Brown, K.J., Fitton, R.J., Schoups, G., Allen, G.B., Wahl, K.A., Hebda, R.J., 2006. Holocene precipitation in the coastal temperate rainforest complex of southern British Columbia, Canada. *Quaternary Science Reviews* 25, 2762–2779. <https://doi.org/10.1016/j.quascirev.2006.02.020>
- Brown, K.J., Giesecke, T., 2014. Holocene fire disturbance in the boreal forest of central Sweden. *Boreas* 43, 639–651. <https://doi.org/10.1111/bor.12056>
- Brown, K.J., Hebda, R.J., 2003. Coastal rainforest connections disclosed through a Late Quaternary vegetation, climate, and fire history investigation from the mountain hemlock zone on southern Vancouver Island, British Columbia, Canada. *Review of Palaeobotany and Palynology* 123, 247–269. [https://doi.org/10.1016/s0034-6667\(02\)00195-1](https://doi.org/10.1016/s0034-6667(02)00195-1)



- Brown, K.J., Hebda, R.J., 2002. Origin, development, and dynamics of coastal temperate conifer rainforests of southern Vancouver Island, Canada. *Canadian Journal of Forest Research* 32, 353–372. <https://doi.org/10.1139/x01-197>
- Brugger, S.O., Gobet, E., van Leeuwen, J.F.N., Ledru, M.-P., Colombaroli, D., van der Knaap, W.O., Lombardo, U., Escobar-Torrez, K., Finsinger, W., Rodrigues, L., Giesche, A., 2016. Long-term man–environment interactions in the Bolivian Amazon: 8000 years of vegetation dynamics. *Quaternary Science Reviews* 132, 114–128. <https://doi.org/10.1016/j.quascirev.2015.11.001>
- Brunelle, A., Anderson, R.S., 2003. Sedimentary charcoal as an indicator of late-Holocene drought in the Sierra Nevada, California, and its relevance to the future. *The Holocene* 13, 21–28. <https://doi.org/10.1191/0959683603h1591rp>
- Brunelle, A., Whitlock, C., 2003. Postglacial fire, vegetation, and climate history in the Clearwater Range, Northern Idaho, USA. *Quaternary Research* 60, 307–318. <https://doi.org/10.1016/j.yqres.2003.07.009>
- Brunelle, A., Whitlock, C., Bartlein, P.J., Kipfmüller, K., 2005. Holocene fire and vegetation along environmental gradients in the Northern Rocky Mountains. *Quaternary Science Reviews* 24, 2281–2300. <https://doi.org/10.1016/j.quascirev.2004.11.010>
- Brunelle-Daines, A.R., 2002. Holocene Changes in Fire, Climate and Vegetation in the Northern Rocky Mountains of Idaho and Western Montana (PhD thesis). University of Oregon, Eugene, Oregon, USA.
- Brunner Jass, R.M., 1999. Fire occurrence and paleoecology at Alamo Bog and Chihuahueños Bog, Jemez Mountains, New Mexico, USA (PhD thesis). Northern Arizona University, Flagstaff, Arizona, USA.
- Brunschön, C., Behling, H., 2009. Late Quaternary vegetation, fire and climate history reconstructed from two cores at Cerro Toledo, Podocarpus National Park, southeastern Ecuadorian Andes. *Quaternary Research* 72, 388–399. <https://doi.org/10.1016/j.yqres.2009.07.001>
- Buckman, S., Brownlie, K.C., Bourman, R.P., Murray-Wallace, C.V., Morris, R.H., Lachlan, T.J., Roberts, R.G., Arnold, L.J., Cann, J.H., 2009. Holocene palaeofire records in a high-level, proximal valley-fill (Wilson Bog), Mount Lofty Ranges, South Australia. *The Holocene* 19, 1017–1029. <https://doi.org/10.1177/0959683609340998>
- Builth, H., Kershaw, A.P., White, C., Roach, A., Hartney, L., McKenzie, M., Lewis, T., Jacobsen, G., 2008. Environmental and cultural change on the Mt Eccles lava-flow landscapes of southwest Victoria, Australia. *The Holocene* 18, 413–424. <https://doi.org/10.1177/0959683607087931>
- Bunting, M.J., 1996. The development of heathland in Orkney, Scotland: pollen records from Loch of Knitchen (Rousay) and Loch of Torness (Hoy). *The Holocene* 6, 193–212. <https://doi.org/10.1177/095968369600600206>
- Bunting, M.J., 1994. Vegetation history of Orkney, Scotland; pollen records from two small basins in west Mainland. *New Phytologist* 128, 771–792. <https://doi.org/10.1111/j.1469-8137.1994.tb04039.x>
- Burbridge, R.E., Mayle, F.E., Killeen, T.J., 2004. Fifty-thousand-year vegetation and climate history of Noel Kempff Mercado National Park, Bolivian Amazon. *Quaternary Research* 61, 215–230. <https://doi.org/10.1016/j.yqres.2003.12.004>
- Burney, D.A., 1987. Late Quaternary stratigraphic charcoal records from Madagascar. *Quaternary Research* 28, 274–280. [https://doi.org/10.1016/0033-5894\(87\)90065-2](https://doi.org/10.1016/0033-5894(87)90065-2)
- Bush, M.B., n.d. Unpublished data.
- Bush, M.B., Colinvaux, P.A., 1994. Tropical forest disturbance: paleoecological records from Darien, Panama. *Ecology* 75, 1761–1768. <https://doi.org/10.2307/1939635>
- Bush, M.B., de Oliveira, P.E., 2006. The rise and fall of the Refugial Hypothesis of Amazonian speciation: a paleoecological perspective. *Biota Neotropica* 6. <https://doi.org/10.1590/s1676-06032006000100002>

- Bush, M.B., Hansen, B.C.S., Rodbell, D.T., Seltzer, G.O., Young, K.R., León, B., Abbott, M.B., Silman, M.R., Gosling, W.D., 2005. A 17 000-year history of Andean climate and vegetation change from Laguna de Chochos, Peru. *Journal of Quaternary Science* 20, 703–714. <https://doi.org/10.1002/jqs.983>
- Bush, M.B., Miller, M.C., de Oliveira, P.E., Colinvaux, P.A., 2000. Two histories of environmental change and human disturbance in eastern lowland Amazonia. *The Holocene* 10, 543–553. <https://doi.org/10.1191/095968300672647521>
- Bush, M.B., Silman, M.R., de Toledo, M.B., Listopad, C., Gosling, W.D., Williams, C., de Oliveira, P.E., Krisel, C., 2007. Holocene fire and occupation in Amazonia: records from two lake districts. *Philosophical Transactions of the Royal Society B: Biological Sciences* 362, 209–218. <https://doi.org/10.1098/rstb.2006.1980>
- Bush, M.B., Silman, M.R., Listopad, C.M.C.S., 2007. A regional study of Holocene climate change and human occupation in Peruvian Amazonia. *Journal of Biogeography* 34, 1342–1356. <https://doi.org/10.1111/j.1365-2699.2007.01704.x>
- Bussières, B., 1992. La Déforestation Subalpine au Mont du Lac a l’Empeche, Charlevoix, Québec (PhD thesis). Université Laval, Québec, Canada.
- Byrne, R., Horn, S.P., 1989. Prehistoric agriculture and forest clearance in the Sierra de los Tuxtles, Veracruz, Mexico. *Palynology* 13, 181–193. <https://doi.org/10.1080/01916122.1989.9989360>
- Caballero, M., Vázquez, G., Lozano-García, M. d.S., Rodríguez, A., Sosa-Nájera, S., Ruiz-Fernández, A.C., Ortega, B., 2006. Present limnological conditions and recent (ca. 340 yr) palaeolimnology of a tropical lake in the Sierra de Los Tuxtles, eastern Mexico. *Journal of Paleolimnology* 35, 83–97. <https://doi.org/10.1007/s10933-005-7427-5>
- Cai, Y.F., Miao, X.M., Jin, H.L., Bing, L., Yan, Y., 2015. Mid-Holocene charcoal records and fire history in the east edge of the Mu Us Sandy Land, China. *Journal of Desert Research* 35, 1156–1162.
- Calder, W.J., Parker, D., Stopka, C.J., Jiménez-Moreno, G., Shuman, B.N., 2015. Medieval warming initiated exceptionally large wildfire outbreaks in the Rocky Mountains. *Proceedings of the National Academy of Sciences* 112, 13261–13266. <https://doi.org/10.1073/pnas.1500796112>
- Camarero, J.J., Sangüesa-Barreda, G., Pérez-Díaz, S., Montiel-Molina, C., Seijo, F., López-Sáez, J.A., 2019. Abrupt regime shifts in post-fire resilience of Mediterranean mountain pinewoods are fuelled by land use. *International Journal of Wildland Fire* 28, 329–341. <https://doi.org/10.1071/WF18160>
- Camill, P., Umbanhowar Jr, C.E., Geiss, C., Hobbs, W.O., Edlund, M.B., Shinneman, A.L.C., Dorale, J.A., Lynch, J., 2012. Holocene climate change and landscape development from a low-Arctic tundra lake in the western Hudson Bay region of Manitoba, Canada. *Journal of Paleolimnology* 48, 175–192. <https://doi.org/10.1007/s10933-012-9619-0>
- Camill, P., Umbanhowar Jr, C.E., Teed, R., Geiss, C.E., Aldinger, J., Dvorak, L., Kenning, J., Limmer, J., Walkup, K., 2003. Late-glacial and Holocene climatic effects on fire and vegetation dynamics at the prairie–forest ecotone in south-central Minnesota. *Journal of Ecology* 91, 822–836. <https://doi.org/10.1046/j.1365-2745.2003.00812.x>
- Campbell, J.F.E., Fletcher, W.J., Joannin, S., Hughes, P.D., Rhanem, M., Zielhofer, C., 2017. Environmental drivers of Holocene forest development in the Middle Atlas, Morocco. *Frontiers in Ecology and Evolution* 5. <https://doi.org/10.3389/fevo.2017.00113>
- Cao, X.Y., 2008. Sediment Records on Environment Changes and Human Activities Since the Holocene in Huanhe Valley, Henan Province, China (PhD thesis). Hebei Normal University, Shijiazhuang, China.
- Carcaillet, C., 1998. A spatially precise study of Holocene fire history, climate and human impact within the Maurienne valley, North French Alps. *Journal of Ecology* 86, 384–396. <https://doi.org/10.1046/j.1365-2745.1998.00267.x>
- Carcaillet, C., Ali, A.A., Blarquez, O., Genries, A., Mourier, B., Bremond, L., 2009. Spatial variability of fire history in subalpine forests: from natural to cultural regimes. *Ecoscience* 16, 1–12. <https://doi.org/10.2980/16-1-3189>

- Carcaillet, C., Almquist, H., Asnong, H., Bradshaw, R.H.W., Carrión, J.S., Gaillard, M.-J., Gajewski, K., Haas, J.N., Haberle, S.G., Hadorn, P., Müller, S.D., Richard, P.J.H., Richoz, I., Rösch, M., Sánchez-Goñi, M.F., von Stedingk, H., Stevenson, A.C., Talon, B., Tardy, C., Tinner, W., Tryterud, E., Wick, L., Willis, K.J., 2002. Holocene biomass burning and global dynamics of the carbon cycle. *Chemosphere* 49, 845–863. [https://doi.org/10.1016/S0045-6535\(02\)00385-5](https://doi.org/10.1016/S0045-6535(02)00385-5)
- Carcaillet, C., Bergeron, Y., Richard, P.J.H., Fréchette, B., Gauthier, S., Prairie, Y.T., 2001. Change of fire frequency in the eastern Canadian boreal forests during the Holocene: does vegetation composition or climate trigger the fire regime? *Journal of Ecology* 89, 930–946. <https://doi.org/10.1111/j.1365-2745.2001.00614.x>
- Carcaillet, C., Bergman, I., Delorme, S., Hornberg, G., Zackrisson, O., 2007. Long-term fire frequency not linked to prehistoric occupations in northern Swedish boreal forest. *Ecology* 88, 465–477. [https://doi.org/10.1890/0012-9658\(2007\)88\[465:Lffnlt\]2.0.Co;2](https://doi.org/10.1890/0012-9658(2007)88[465:Lffnlt]2.0.Co;2)
- Carcaillet, C., Blarquez, O., 2017. Fire ecology of a tree glacial refugium on a nunatak with a view on Alpine glaciers. *New Phytologist* 216, 1281–1290. <https://doi.org/10.1111/nph.14721>
- Carcaillet, C., Richard, P.J.H., 2000. Holocene changes in seasonal precipitation highlighted by fire incidence in eastern Canada. *Climate Dynamics* 16, 549–559. <https://doi.org/10.1007/s003820000062>
- Carcaillet, C., Richard, P.J.H., Asnong, H., Capece, L., Bergeron, Y., 2006. Fire and soil erosion history in East Canadian boreal and temperate forests. *Quaternary Science Reviews* 25, 1489–1500. <https://doi.org/10.1016/j.quascirev.2006.01.004>
- Carlson, L.J., Finney, B.P., 2004. A 1300-year history of vegetation and environmental change at Jan Lake, east-central Alaska. *The Holocene* 14, 818–827. <https://doi.org/10.1191/0959683604hl762rp>
- Caroli, I., Caldara, M., 2006. Vegetation history of Lago Battaglia (eastern Gargano coast, Apulia, Italy) during the middle-late Holocene. *Vegetation History and Archaeobotany* 16, 317–327. <https://doi.org/10.1007/s00334-006-0045-y>
- Carrión, J.S., 2002. Patterns and processes of Late Quaternary environmental change in a montane region of southwestern Europe. *Quaternary Science Reviews* 21, 2047–2066. [https://doi.org/10.1016/s0277-3791\(02\)00010-0](https://doi.org/10.1016/s0277-3791(02)00010-0)
- Carrión, J.S., Andrade, A., Bennett, K.D., Navarro, C., Munuera, M., 2001. Crossing forest thresholds: inertia and collapse in a Holocene sequence from south-central Spain. *The Holocene* 11, 635–653. <https://doi.org/10.1191/09596830195672>
- Carrión, J.S., Fuentes, N., González-Sampériz, P., Sánchez Quirante, L., Finlayson, J.C., Fernández, S., Andrade, A., 2007. Holocene environmental change in a montane region of southern Europe with a long history of human settlement. *Quaternary Science Reviews* 26, 1455–1475. <https://doi.org/10.1016/j.quascirev.2007.03.013>
- Carrión, J.S., Munuera, M., Dupre, M., Andrade, A., 2001. Abrupt vegetation changes in the Segura Mountains of southern Spain throughout the Holocene. *Journal of Ecology* 89, 783–797. <https://doi.org/10.1046/j.0022-0477.2001.00601.x>
- Carrión, J.S., Sánchez-Gómez, P., Mota, J.F., Yll, R., Chaín, C., 2003. Holocene vegetation dynamics, fire and grazing in the Sierra de Gádor, southern Spain. *The Holocene* 13, 839–849. <https://doi.org/10.1191/0959683603hl662rp>
- Carrión, J.S., Van Geel, B., 1999. Fine-resolution Upper Weichselian and Holocene palynological record from Navarrés (Valencia, Spain) and a discussion about factors of Mediterranean forest succession. *Review of Palaeobotany and Palynology* 106, 209–236. [https://doi.org/10.1016/s0034-6667\(99\)00009-3](https://doi.org/10.1016/s0034-6667(99)00009-3)
- Carter, V.A., Moravcová, A., Chiverrell, R.C., Clear, J.L., Finsinger, W., Dreslerová, D., Halsall, K., Kuneš, P., 2018. Holocene-scale fire dynamics of central European temperate spruce-beech forests. *Quaternary Science Reviews* 191, 15–30. <https://doi.org/10.1016/j.quascirev.2018.05.001>
- Cedric, P., 2008. Dynamique des marges forestières de milieux tourbeux du Haut-Boreal, Quebec nordique (PhD thesis). Université Laval, Quebec, Canada.

- Chabaud, L., Sánchez-Goñi, M.F., Desprat, S., Rossignol, L., 2014. Land–sea climatic variability in the eastern North Atlantic subtropical region over the last 14,200 years: atmospheric and oceanic processes at different timescales. *The Holocene* 24, 787–797. <https://doi.org/10.1177/0959683614530439>
- Chalson, J.M., 1991. The Late Quaternary Vegetation and Climatic History of the Blue Mountains, N.S.W. Australia (PhD thesis). University of New South Wales, Sydney, Australia.
- Chalson, J.M., Martin, H.A., 2009. A Holocene history of the vegetation of the Blue Mountains, New South Wales, in: *Proceedings of the Linnean Society of New South Wales*. pp. 77–109.
- Chen, B., Zheng, Z., Huang, K., Zheng, Y., Zhang, G., Zhang, Q., Huang, X., 2014. Radionuclide dating of recent sediment and the validation of pollen–environment reconstruction in a small watershed reservoir in southeastern China. *Catena* 115, 29–38. <https://doi.org/10.1016/j.catena.2013.11.010>
- Chen, J.R., 2017. Holocene Fire History and Environmental Evolution in Subei Basin. Nanjing (PhD thesis). Nanjing Normal University, Nanjing, China.
- Chepstow-Lusty, A.J., Bennett, K.D., Fjeldså, J., Kendall, A., Galiano, W., Tupayachi Herrera, A., 1998. Tracing 4,000 Years of environmental history in the Cuzco area, Peru, from the pollen record. *Mountain Research and Development* 18, 159. <https://doi.org/10.2307/3673971>
- Chiarugi, A., 1936. Ricerche sulla vegetazione dell’Etruria Marittima: I.—Cicli forestali postglaciali nell’Appennino Etrusco Attraverso l’analisi pollinica di torbe e depositi lacustri presso L’Alpe Delle Tre Potenze E Il M. Rondinaio. *Plant Biosystem* 43, 3–61. <https://doi.org/10.1080/11263503609438721>
- Chipman, M.L., Hu, F.S., 2017. Linkages among climate, fire, and thermoerosion in Alaskan tundra over the past three millennia. *Journal of Geophysical Research: Biogeosciences* 122, 3362–3377. <https://doi.org/10.1002/2017jg004027>
- Chipman, M.L., Hudspith, V., Higuera, P.E., Duffy, P.A., Kelly, R., Oswald, W.W., Hu, F.S., 2015. Spatiotemporal patterns of tundra fires: late-Quaternary charcoal records from Alaska. *Biogeosciences* 12, 4017–4027. <https://doi.org/10.5194/bg-12-4017-2015>
- Chu, G.Q., 2001. Sediment flux change of charcoal and human activities over 2000 years in the Huguangyan Maar Lake. *Quaternary Sciences* 21, 183.
- Clark, D.J., 1997. A Palaeoenvironmental Study of Thirlmere Lakes: Applications to Contemporary Vegetation Management (BSc (Hons) thesis). School of Geography, University of New South Wales, Sydney, Australia.
- Clark, G., Hope, G.S., 1997. Preliminary report on archaeological and palaeoenvironmental investigations in northern Lau (Mago, Yacata-Kaibu and Vatuvara). Report to the Fiji Museum, Suva.
- Clark, J.S., Grimm, E.C., Lynch, J., Mueller, P.G., 2001. Effects of Holocene climate change on the C4 grassland/woodland boundary in the Northern Plains, USA. *Ecology* 82, 620–636. <https://doi.org/10.2307/2680184>
- Clark, J.S., Hussey, T.C., 1996. Estimating the mass flux of charcoal from sedimentary records: effects of particle size, morphology, and orientation. *The Holocene* 6, 129–144. <https://doi.org/10.1177/095968369600600201>
- Clark, J.S., Royall, P.D., 1996. Local and regional sediment charcoal evidence for fire regimes in presettlement north-eastern North America. *The Journal of Ecology* 84, 365–382. <https://doi.org/10.2307/2261199>
- Clark, J.S., Stocks, B.J., Richard, P.J.H., 1996. Climate implications of biomass burning since the 19th century in eastern North America. *Global Change Biology* 2, 433–442. <https://doi.org/10.1111/j.1365-2486.1996.tb00093.x>
- Clark, R.L., 1986. The Fire History of Rotten Swamp (Unpublished Report). ACT Parks; Conservation Service, CSIRO, Canberra, Australia.
- Clark, R.L., 1983. Pollen and charcoal evidence for the effects of Aboriginal burning on the vegetation of Australia. *Archaeology in Oceania* 18, 32–37. <https://doi.org/10.1002/arco.1983.18.1.32>



- Clear, J.L., Seppä, H., Kuosmanen, N., Bradshaw, R.H.W., 2015. Holocene stand-scale vegetation dynamics and fire history of an old-growth spruce forest in southern Finland. *Vegetation History and Archaeobotany* 24, 731–741. <https://doi.org/10.1007/s00334-015-0533-z>
- Clear, J.L., Seppä, H., Kuosmanen, N., Bradshaw, R.H.W., 2013. Holocene fire frequency variability in Vesijako, Strict Nature Reserve, Finland, and its application to conservation and management. *Biological Conservation* 166, 90–97. <https://doi.org/10.1016/j.biocon.2013.06.008>
- Clement, R.M., Horn, S.P., 2001. Pre-Columbian land-use history in Costa Rica: a 3000-year record of forest clearance, agriculture and fires from Laguna Zoncho. *The Holocene* 11, 419–426. <https://doi.org/10.1191/095968301678302850>
- Cole, K.L., Liu, G.-W., 1994. Holocene paleoecology of an estuary on Santa Rosa Island, California. *Quaternary Research* 41, 326–335. <https://doi.org/10.1006/qres.1994.1037>
- Cole, K.L., Taylor, R.S., 1995. Past and current trends of change in a dune prairie/oak savanna reconstructed through a multiple-scale history. *Journal of Vegetation Science* 6, 399–410. <https://doi.org/10.2307/3236239>
- Colhoun, E.A., 1992. Late Glacial and Holocene vegetation history at Poets Hill lake, western Tasmania. *Australian Geographer* 23, 11–23. <https://doi.org/10.1080/00049189208703049>
- Colhoun, E.A., 1985. Pre-last glaciation maximum vegetation history at Henty Bridge, western Tasmania. *New Phytologist* 100, 681–690. <https://doi.org/10.1111/j.1469-8137.1985.tb02812.x>
- Colhoun, E.A., Pola, J.S., Barton, C.E., Heijnis, H., 1999. Late Pleistocene vegetation and climate history of Lake Selina, western Tasmania. *Quaternary International* 57-58, 5–23. [https://doi.org/10.1016/s1040-6182\(98\)00046-9](https://doi.org/10.1016/s1040-6182(98)00046-9)
- Colhoun, E.A., van de Geer, G., Hannan, D., 1991. Late Glacial and Holocene vegetation history at Dublin Bog north-central Tasmania. *Australian Geographical Studies* 29, 337–354. <https://doi.org/10.1111/j.1467-8470.1991.tb00724.x>
- Colinvaux, P.A., Bush, M.B., Steinitz-Kannan, M., Miller, M.C., 1997. Glacial and postglacial pollen records from the Ecuadorian Andes and Amazon. *Quaternary Research* 48, 69–78. <https://doi.org/10.1006/qres.1997.1908>
- Colinvaux, P.A., de Oliveira, P.E., Moreno, J.E., Miller, M.C., Bush, M.B., 1996. A long pollen record from lowland Amazonia: Forest and cooling in glacial times. *Science* 274, 85–88. <https://doi.org/10.1126/science.274.5284.85>
- Colombaroli, D., Gavin, D.G., 2010. Highly episodic fire and erosion regime over the past 2,000 y in the Siskiyou Mountains, Oregon. *Proceedings of the National Academy of Sciences* 107, 18909–18914. <https://doi.org/10.1073/pnas.1007692107>
- Colombaroli, D., Marchetto, A., Tinner, W., 2007. Long-term interactions between Mediterranean climate, vegetation and fire regime at Lago di Massaciuccoli (Tuscany, Italy). *Journal of Ecology* 95, 755–770. <https://doi.org/10.1111/j.1365-2745.2007.01240.x>
- Colombaroli, D., Tinner, W., van Leeuwen, J.F.N., Noti, R., Vescovi, E., Vannièrè, B., Magny, M., Schmidt, R., Bugmann, H., 2009. Response of broadleaved evergreen Mediterranean forest vegetation to fire disturbance during the Holocene: insights from the peri-Adriatic region. *Journal of Biogeography* 36, 314–326. <https://doi.org/10.1111/j.1365-2699.2008.01987.x>
- Connor, S.E., n.d. Unpublished data.
- Connor, S.E., 2006. A promethean legacy: late quaternary vegetation history of southern Georgia, Caucasus (PhD thesis). Faculty of Arts, Social and Environmental Enquiry, University of Melbourne, Victoria, Australia. <https://doi.org/11343/39418>
- Connor, S.E., Araújo, J., van der Knaap, W.O., van Leeuwen, J.F.N., 2012. A long-term perspective on biomass burning in the Serra da Estrela, Portugal. *Quaternary Science Reviews* 55, 114–124. <https://doi.org/10.1016/j.quascirev.2012.08.007>

- Connor, S.E., Kvavadze, E.V., 2005. Climatic and human influences on vegetation dynamics around Tbilisi over the past 6000 years. *Proceedings of the Georgian Academy of Sciences: Biological series B* 3, 64–76.
- Connor, S.E., Sagona, A., 2007. Environment and society in the late prehistory of southern Georgia, Caucasus. *Les Cultures du Caucase: leurs relations avec le Proche-Orient* 21–36.
- Connor, S.E., Thomas, I., Kvavadze, E.V., 2007. A 5600-yr history of changing vegetation, sea levels and human impacts from the Black Sea coast of Georgia. *The Holocene* 17, 25–36. <https://doi.org/10.1177/0959683607073270>
- Connor, S.E., Thomas, I., Kvavadze, E.V., Arabuli, G.J., Avakov, G.S., Sagona, A., 2004. A survey of modern pollen and vegetation along an altitudinal transect in southern Georgia, Caucasus region. *Review of Palaeobotany and Palynology* 129, 229–250. <https://doi.org/10.1016/j.revpalbo.2004.02.003>
- Cordeiro, R.C., Turcq, B., Suguio, K., Oliveira da Silva, A., Sifeddine, A., Volkmer-Ribeiro, C., 2008. Holocene fires in East Amazonia (Carajás), new evidences, chronology and relation with paleoclimate. *Global and Planetary Change* 61, 49–62. <https://doi.org/10.1016/j.gloplacha.2007.08.005>
- Cordova, C.E., 2008. Floodplain degradation and settlement history in Wadi al-Wala and Wadi ash-Shallalah, Jordan. *Geomorphology* 101, 443–457. <https://doi.org/10.1016/j.geomorph.2007.04.026>
- Cordova, C.E., Lehman, P.H., 2005. Holocene environmental change in southwestern Crimea (Ukraine) in pollen and soil records. *The Holocene* 15, 263–277. <https://doi.org/10.1191/0959683605hl791rp>
- Couillard, P.-L., Payette, S., Grondin, P., 2013. Long-term impact of fire on high-altitude balsam fir (*Abies balsamea*) forests in south-central Quebec deduced from soil charcoal. *Canadian Journal of Forest Research* 43, 188–199. <https://doi.org/10.1139/cjfr-2012-0414>
- Courtney-Mustaphi, C.J., Shoemaker, A.C., Githumbi, E.N., Kariuki, R., Muriuki, R.M., Rucina, S., Marchant, R., 2015. Historical ecology perspectives of changes in Amboseli, Kenya. *GLP News* 12, 26–29.
- Court-Picon, M., 2007. Mise en place du paysage dans un milieu de moyenne et haute montagne du tardiglaciaire à l'époque actuelle: analyse du signal palynologique en Champsaur (Hautes-Alpes, France) à l'interface des dynamiques naturelles et des dynamiques sociales (PhD thesis). Université de Franche-Comté, Besançon, France.
- Cridlebaugh, P.A., 1984. American Indian and Euro-American Impact upon Holocene Vegetation in the Lower Little Tennessee River Valley, East Tennessee (PhD thesis). Department of Anthropology, University of Tennessee, Knoxville, Tennessee, USA.
- Cupper, M.L., 2006. Luminescence and radiocarbon chronologies of playa sedimentation in the Murray Basin, southeastern Australia. *Quaternary Science Reviews* 25, 2594–2607. <https://doi.org/10.1016/j.quascirev.2005.09.011>
- Cupper, M.L., 2005. Last Glacial to Holocene evolution of semi-arid rangelands in southeastern Australia. *The Holocene* 15, 541–553. <https://doi.org/10.1191/0959683605hl829rp>
- Czerwiński, S., Guzowski, P., Karpińska-Kończek, M., Lamentowicz, M., Gałka, M., Kończek, P., Izdebski, A., Poniat, R., 2019. Znaczenie wspólnych badań historycznych i paleoekologicznych nad wpływem człowieka na środowisko. Przykład ze stanowiska Kazanie we wschodniej Wielkopolsce - The Importance of Collaborative Historical and Palaeoecological Research on Human Impact on the Environment: The Case of the Kazanie Site in Eastern Greater Poland (Eastern Wielkopolska). *Studia Geohistorica* 56–74.
- Czerwiński, S., Guzowski, P., Lamentowicz, M., Gałka, M., Karpińska-Kończek, M., Poniat, R., Lokas, E., Diaconu, A.-C., Schwarzer, J., Miecznik, M., Kończek, P., 2021. Environmental implications of past socioeconomic events in Greater Poland during the last 1200 years. Synthesis of paleoecological and historical data. *Quaternary Science Reviews* 259, 106902. <https://doi.org/10.1016/j.quascirev.2021.106902>
- Czerwiński, S., Margielewski, W., Gałka, M., Kończek, P., 2020. Late Holocene transformations of lower montane forest in the Beskid Wyspowy Mountains (Western Carpathians, Central Europe): a case

- study from Mount Mogielica. *Palynology* 44, 355–368.  
<https://doi.org/10.1080/01916122.2019.1617207>
- Damblon, F., 1991. Contribution pollenanalytique à l'histoire des forêts de chêne liège au Maroc: La subéraie de Krinda, in: *Proceedings of the Symposium on African Palynology*. pp. 171–183.
- Damnati, B., Reddad, H., 2017. Les microcharbons dans les sédiments du lac Ifrah moyen atlas (Maroc): significations climatiques depuis 24 000 ans cal. bp. *Quaternaire* 28, 225–229.  
<https://doi.org/10.4000/quaternaire.8082>
- Daniau, A.-L., Sánchez-Goñi, M.F., Beaufort, L., Laggoun-Défarge, F., Loutre, M.-F., Duprat, J., 2007. Dansgaard–Oeschger climatic variability revealed by fire emissions in southwestern Iberia. *Quaternary Science Reviews* 26, 1369–1383. <https://doi.org/10.1016/j.quascirev.2007.02.005>
- Daniau, A.-L., Sánchez-Goñi, M.F., Duprat, J., 2009. Last glacial fire regime variability in western France inferred from microcharcoal preserved in core MD04-2845, Bay of Biscay. *Quaternary Research* 71, 385–396. <https://doi.org/10.1016/j.yqres.2009.01.007>
- Daniau, A.-L., Sánchez-Goñi, M.F., Martínez, P., Urrego, D.H., Bout-Roumazeilles, V., Desprat, S., Marlon, J.R., 2013. Orbital-scale climate forcing of grassland burning in southern Africa. *Proceedings of the National Academy of Sciences* 110, 5069–5073. <https://doi.org/10.1073/pnas.1214292110>
- Daniels, M.L., Anderson, S., Whitlock, C., 2005. Vegetation and fire history since the Late Pleistocene from the Trinity Mountains, northwestern California, USA. *The Holocene* 15, 1062–1071.  
<https://doi.org/10.1191/0959683605hl878ra>
- Dark, P., 2005. Mid- to late-Holocene vegetational and land-use change in the Hadrian's Wall region: a radiocarbon-dated pollen sequence from Crag Lough, Northumberland, England. *Journal of Archaeological Science* 32, 601–618. <https://doi.org/10.1016/j.jas.2004.11.009>
- Davis, B.A.S., n.d. Unpublished data.
- Davis, B.A.S., Stevenson, A.C., 2007. The 8.2ka event and early–mid Holocene forests, fires and flooding in the Central Ebro Desert, NE Spain. *Quaternary Science Reviews* 26, 1695–1712.  
<https://doi.org/10.1016/j.quascirev.2007.04.007>
- Davis, O.K., 1992. Rapid climatic change in coastal southern California inferred from pollen analysis of San Joaquin Marsh. *Quaternary Research* 37, 89–100. [https://doi.org/10.1016/0033-5894\(92\)90008-7](https://doi.org/10.1016/0033-5894(92)90008-7)
- Davis, O.K., Shafer, D.S., 1992. A Holocene climatic record for the Sonoran Desert from pollen analysis of Montezuma Well, Arizona, USA. *Palaeogeography, Palaeoclimatology, Palaeoecology* 92, 107–119.  
[https://doi.org/10.1016/0031-0182\(92\)90137-t](https://doi.org/10.1016/0031-0182(92)90137-t)
- Day, S.P., 1991. Post-glacial vegetational history of the Oxford region. *New Phytologist* 119, 445–470.  
<https://doi.org/10.1111/j.1469-8137.1991.tb00045.x>
- D'Costa, D.M., 1997. The Reconstruction of Quaternary Vegetation and Climate on King Island, Bass Strait, Australia (PhD thesis). Monash University, Australia.
- D'Costa, D.M., Edney, P., Kershaw, A.P., de Deckker, P., 1989. Late Quaternary palaeoecology of Tower Hill, Victoria, Australia. *Journal of Biogeography* 16, 461–482. <https://doi.org/10.2307/2845109>
- D'Costa, D.M., Grindrod, J., Ogden, R., 1993. Preliminary environmental reconstructions from late Quaternary pollen and mollusc assemblages at Egg Lagoon, King Island, Bass Strait. *Austral Ecology* 18, 351–366. <https://doi.org/10.1111/j.1442-9993.1993.tb00462.x>
- de Beaulieu, J.-L., Brugiapaglia, E., Joannin, S., Guiter, F., Zanchetta, G., Wulf, S., Peyron, O., Bernardo, L., Didier, J., Stock, A., Magny, D.R.M., 2017. Lateglacial-Holocene abrupt vegetation changes at Lago Trifoglietti in Calabria, Southern Italy: The setting of ecosystems in a refugial zone. *Quaternary Science Reviews* 158, 44–57. <https://doi.org/10.1016/j.quascirev.2016.12.013>
- Deforce, K., 2011. Middle and late Holocene vegetation and landscape evolution of the Scheldt estuary: a palynological study of a peat deposit from Doel (Belgium). *Geologica Belgica* 14, 277–288.
- de Freitas, H.A., Ruiz Pessenda, L.C., Aravena, R., Marques Gouveia, S.E., de Souza Ribeiro, A., Boulet, R., 2001. Late Quaternary vegetation dynamics in the southern Amazon basin inferred from carbon

- isotopes in soil organic matter. *Quaternary Research* 55, 39–46.  
<https://doi.org/10.1006/qres.2000.2192>
- Delcourt, H.R., Delcourt, P.A., 1997. Pre-Columbian Native American use of fire on Southern Appalachian landscapes. *Conservation Biology* 11, 1010–1014. <https://doi.org/10.1046/j.1523-1739.1997.96338.x>
- Delcourt, H.R., Delcourt, P.A., Spiker, E.C., 1983. A 12 000-year record of forest history from Cahaba Pond, St. Clair County, Alabama. *Ecology* 64, 874–887. <https://doi.org/10.2307/1937210>
- Delcourt, P.A., Delcourt, H.R., 1998. Forest Dynamics and Fire History at Curt Pond, Pulaski County, Kentucky. USDA Forest Service, Daniel Boone National Forest, Winchester, Kentucky, USA.
- Delcourt, P.A., Delcourt, H.R., 1997. Report of Paleoecological Investigations, Cliff Palace Pond, Jackson County, Kentucky. USDA Forest Service, Daniel Boone National Forest, Winchester, Kentucky, USA.
- Delcourt, P.A., Delcourt, H.R., Cridlebaugh, P.A., Chapman, J., 1986. Holocene ethnobotanical and paleoecological record of human impact on vegetation in the Little Tennessee River Valley, Tennessee. *Quaternary Research* 25, 330–349. [https://doi.org/10.1016/0033-5894\(86\)90005-0](https://doi.org/10.1016/0033-5894(86)90005-0)
- Delcourt, P.A., Delcourt, H.R., Ison, C.R., Sharp, W.E., Gremillion, K.J., 1998. Prehistoric human use of fire, the Eastern Agricultural Complex, and Appalachian oak-chestnut forests: Paleoecology of Cliff Palace Pond, Kentucky. *American Antiquity* 63, 263–278. <https://doi.org/10.2307/2694697>
- de Montford, M., 2008. Late Holocene Fire History: Human Impacts and Climate Variability at Wingecarribee Swamp (BSc (Hons) thesis). School of Biological, Earth & Environmental Sciences, University of New South Wales, Sydney, Australia.
- de Nascimento, L., Nogué, S., Criado, C., Ravazzi, C., Whittaker, R.J., Willis, K.J., Fernández-Palacios, J.M., 2016. Reconstructing Holocene vegetation on the island of Gran Canaria before and after human colonization. *The Holocene* 26, 113–125. <https://doi.org/10.1177/0959683615596836>
- de Nascimento, L., Willis, K.J., Fernández-Palacios, J.M., Criado, C., Whittaker, R.J., 2009. The long-term ecology of the lost forests of La Laguna, Tenerife (Canary Islands). *Journal of Biogeography* 36, 499–514. <https://doi.org/10.1111/j.1365-2699.2008.02012.x>
- de Oliveira, P.E., Barreto, A.M.F., Suguio, K., 1999. Late Pleistocene/Holocene climatic and vegetational history of the Brazilian caatinga: the fossil dunes of the middle São Francisco River. *Palaeogeography, Palaeoclimatology, Palaeoecology* 152, 319–337. [https://doi.org/10.1016/S0031-0182\(99\)00061-9](https://doi.org/10.1016/S0031-0182(99)00061-9)
- de Vleeschouwer, F., Piotrowska, N., Sikorski, J., Pawlyta, J., Cheburkin, A., Roux, G., Lamentowicz, M., Fagel, N., Mauquoy, D., 2009. Multiproxy evidence of ‘Little Ice Age’ palaeoenvironmental changes in a peat bog from northern Poland. *The Holocene* 19, 625–637.  
<https://doi.org/10.1177/0959683609104027>
- Devoy, R.J., Dodson, J.R., Thom, B.G., Nichol, S., 1994. Holocene environments in the Hawkesbury valley, New South Wales: a comparison of terrestrial and marine records. *Quaternary Science Reviews* 13, 241–256. [https://doi.org/10.1016/0277-3791\(94\)90028-0](https://doi.org/10.1016/0277-3791(94)90028-0)
- Dickinson, W.R., Burley, D.V., Nunn, P.D., Anderson, A., Hope, G.S., De Biran, A., Burke, C., Matararaba, S., 1998. Geomorphic and archaeological landscapes of the Sigatoka dune site, Viti Levu, Fiji: interdisciplinary investigations. *Asian Perspectives* 37, 1–31.
- Dietze, E., Brykała, D., Schreuder, L.T., Jażdżewski, K., Blarquez, O., Brauer, A., Dietze, M., Obremska, M., Ott, F., Pieńczewska, A., Schouten, S., Hopmans, E.C., Slowinski, M., 2019. Human-induced fire regime shifts during 19th century industrialization: A robust fire regime reconstruction using northern Polish lake sediments. *PLOS ONE* 14, e0222011.
- di Rita, F., Magri, D., 2009. Holocene drought, deforestation and evergreen vegetation development in the central Mediterranean: a 5500 year record from Lago Alimini Piccolo, Apulia, southeast Italy. *The Holocene* 19, 295–306. <https://doi.org/10.1177/0959683608100574>
- Djamali, M., de Beaulieu, J.-L., Andrieu-Ponel, V., Berberian, M., Miller, N.F., Gandouin, E., Lahijani, H., Shah-Hosseini, M., Ponel, P., Salimian, M., Guitter, F., 2009. A late Holocene pollen record from Lake



- Almalou in NW Iran: evidence for changing land-use in relation to some historical events during the last 3700 years. *Journal of Archaeological Science* 36, 1364–1375.  
<https://doi.org/10.1016/j.jas.2009.01.022>
- Djamali, M., de Beaulieu, J.-L., Shah-hosseini, M., Andrieu-Ponel, V., Ponel, P., Amini, A., Akhiani, H., Leroy, S.A.G., Stevens, L., Lahijani, H., Brewer, S., 2008. A late Pleistocene long pollen record from Lake Urmia, NW Iran. *Quaternary Research* 69, 413–420. <https://doi.org/10.1016/j.yqres.2008.03.004>
- Djamali, M., Jones, M.D., Migliore, J., Balatti, S., Fader, M., Contreras, D., Gondet, S., Hosseini, Z., Lahijani, H., Naderi, A., Shumilovskikh, L.S., 2016. Olive cultivation in the heart of the Persian Achaemenid Empire: new insights into agricultural practices and environmental changes reflected in a late Holocene pollen record from Lake Parishan, SW Iran. *Vegetation History and Archaeobotany* 25, 255–269. <https://doi.org/10.1007/s00334-015-0545-8>
- Djamali, M., Ponel, P., Andrieu-Ponel, V., Jacques-Louis Beaulieu, Guibal, F., Miller, N.F., Ramezani, E., Berberian, M., Lahijani, H., Lak, R., 2010. Notes on arboricultural and agricultural practices in ancient Iran based on new pollen evidence. *Paléorient* 36, 175–188.  
<https://doi.org/10013/epic.44366.d088>
- Dodson, J., Li, J., Lu, F., Zhang, W., Yan, H., Cao, S., 2019. A Late Pleistocene and Holocene vegetation and environmental record from Shuangchi Maar, Hainan Province, South China. *Palaeogeography, Palaeoclimatology, Palaeoecology* 523, 89–96. <https://doi.org/10.1016/j.palaeo.2019.03.026>
- Dodson, J.R., 2001. A vegetation and fire history in a subalpine woodland and rain-forest region, Solomons Jewel Lake, Tasmania. *The Holocene* 11, 111–116. <https://doi.org/10.1191/095968301670253295>
- Dodson, J.R., 1986. Holocene vegetation and environments near Goulburn, New South Wales. *Australian Journal of Botany* 34, 231–249. <https://doi.org/10.1071/bt9860231>
- Dodson, J.R., de Salis, T., Myers, C.A., Sharp, A.J., 1994. A thousand years of environmental change and human impact in the alpine zone at Mt Kosciusko, New South Wales. *Australian Geographer* 25, 77–87. <https://doi.org/10.1080/00049189408703100>
- Dodson, J.R., Frank, K., Fromme, M., Hickson, D., McRae, V., Mooney, S.D., Smith, J.D., 1994. Environmental systems and human impact at Cobrico Crater, south-western Victoria. *Australian Geographical Studies* 32, 27–40. <https://doi.org/10.1111/j.1467-8470.1994.tb00658.x>
- Dodson, J.R., Greenwood, P.W., Jones, R.L., 1986. Holocene forest and wetland vegetation dynamics at Barrington Tops, New South Wales. *Journal of Biogeography* 13, 561–585.  
<https://doi.org/10.2307/2844819>
- Dodson, J.R., Hickson, S., Khoo, R., Li, X.-Q., Toia, J., Zhou, W.-J., 2006. Vegetation and environment history for the past 14 000 yr BP from Dingnan, Jiangxi Province, South China. *Journal of Integrative Plant Biology* 48, 1018–1027. <https://doi.org/10.1111/j.1744-7909.2006.00274.x>
- Dodson, J.R., Lu, J.J., 2000. A Late Holocene vegetation and environment record from Byenup Lagoon, south-western Australia. *Australian Geographer* 31, 41–54.  
<https://doi.org/10.1080/00049180093529>
- Dodson, J.R., McRae, V.M., Molloy, K., Roberts, F., Smith, J.D., 1993. Late Holocene human impact on two coastal environments in New South Wales, Australia: a comparison of Aboriginal and European impacts. *Vegetation History and Archaeobotany* 2, 89–100. <https://doi.org/10.1007/bf00202186>
- Dodson, J.R., Mitchell, F.J.G., Bogeholz, H., Julian, N., 1998. Dynamics of temperate rainforest from fine resolution pollen analysis, Upper Ringarooma River, northeastern Tasmania. *Austral Ecology* 23, 550–561. <https://doi.org/10.1111/j.1442-9993.1998.tb00765.x>
- Dodson, J.R., Roberts, F.K., de Salis, T., 1994. Palaeoenvironments and human impact at Burruga Swamp in montane rainforest, Barrington Tops National Park, New South Wales, Australia. *Australian Geographer* 25, 161–169. <https://doi.org/10.1080/00049189408703115>
- Dodson, J., Shi, G., Lu, F., Yan, H., 2021. A 40,000 year record of vegetation, environment and climate change from Chongqing, Central China. *Palaeogeography, Palaeoclimatology, Palaeoecology* 573, 110441.0. <https://doi.org/10.1016/j.palaeo.2021.110441>

- Donders, T.H., Wagner, F., Visscher, H., 2006. Late Pleistocene and Holocene subtropical vegetation dynamics recorded in perched lake deposits on Fraser Island, Queensland, Australia. *Palaeogeography, Palaeoclimatology, Palaeoecology* 241, 417–439. <https://doi.org/10.1016/j.palaeo.2006.04.008>
- Dörfler, W., Feeser, I., van den Bogaard, C., Dreibrodt, S., Erlenkeuser, H., Kleinmann, A., Merkt, J., Wiethold, J., 2012. A high-quality annually laminated sequence from Lake Belau, northern Germany: revised chronology and its implications for palynological and tephrochronological studies. *The Holocene* 22, 1413–1426. <https://doi.org/10.1177/0959683612449756>
- Dreslerová, D., Břízová, E., Růžičková, E., Zeman, A., 2004. Holocene environmental processes and alluvial archaeology in the middle Labe (Elbe) valley, in: Gojda, M. (Ed.), *Ancient Landscape, Settlement Dynamics and Non-destructive Archaeology*. Academia, Praha, Czech Republic, p. 484.0.
- Dull, R.A., 2004a. A Holocene record of Neotropical savanna dynamics from El Salvador. *Journal of Paleolimnology* 32, 219–231. <https://doi.org/10.1023/B:JOPL.0000042906.46791.9c>
- Dull, R.A., 2004b. An 8000-year record of vegetation, climate, and human disturbance from the Sierra de Apaneca, El Salvador. *Quaternary Research* 61, 159–167. <https://doi.org/10.1016/j.yqres.2004.01.002>
- Dull, R.A., 2001. *El Bosque Perdido: A Cultural-Ecological History of Holocene Environmental Change in Western El Salvador* (PhD thesis). University of California–Berkeley, Berkeley, California, USA.
- Dull, R.A., Nevle, R.J., Woods, W.I., Bird, D.K., Avnery, S., Denevan, W.M., 2010. The Columbian Encounter and the Little Ice Age: abrupt land use change, fire, and greenhouse forcing. *Annals of the Association of American Geographers* 100, 755–771. <https://doi.org/10.1080/00045608.2010.502432>
- Dunnette, P.V., Higuera, P.E., McLauchlan, K.K., Derr, K.M., Briles, C.E., Keefe, M.H., 2014. Biogeochemical impacts of wildfires over four millennia in a Rocky Mountain subalpine watershed. *New Phytologist* 203, 900–912. <https://doi.org/10.1111/nph.12828>
- Dupont, L.M., Behling, H., Kim, J.H., 2008. Thirty thousand years of vegetation development and climate change in Angola (Ocean Drilling Program Site 1078). *Climate of the Past* 4, 107–124. <https://doi.org/10.5194/cp-4-107-2008>
- Dyson, W.D., 1995. *A Pollen and Vegetation History from Lake Dove, Western Tasmania* (BSc (Hons) thesis). Department of Geography, University of New South Wales, Sydney, Australia.
- Edwards, K.J., Berridge, J.M.A., 1994. The Late-Quaternary vegetational history of Loch a’Bhogaidh, Rinns of Islay SSSI, Scotland. *New Phytologist* 128, 749–769. <https://doi.org/10.1111/j.1469-8137.1994.tb04038.x>
- Edwards, K.J., Langdon, P.G., Sugden, H., 2007. Separating climatic and possible human impacts in the early Holocene: biotic response around the time of the 8200 cal. yr BP event. *Journal of Quaternary Science* 22, 77–84. <https://doi.org/10.1002/jqs.1018>
- Edwards, K.J., Whittington, G., 2000. Multiple charcoal profiles in a Scottish lake: taphonomy, fire ecology, human impact and inference. *Palaeogeography, Palaeoclimatology, Palaeoecology* 164, 67–86. [https://doi.org/10.1016/S0031-0182\(00\)00176-0](https://doi.org/10.1016/S0031-0182(00)00176-0)
- Edwards, K.J., Whittington, G., 1997. A 12 000-year record of environmental change in the Lomond Hills, Fife, Scotland: vegetational and climatic variability. *Vegetation History and Archaeobotany* 6, 133–152. <https://doi.org/10.1007/BF01372567>
- Edwards, K.J., Whittington, G., Robinson, M., Richter, D., 2005. Palaeoenvironments, the archaeological record and cereal pollen detection at Clickimin, Shetland, Scotland. *Journal of Archaeological Science* 32, 1741–1756. <https://doi.org/10.1016/j.jas.2005.06.004>
- Edwards, K.J., Whittington, G., Tipping, R., 2000. The incidence of microscopic charcoal in late glacial deposits. *Palaeogeography, Palaeoclimatology, Palaeoecology* 164, 247–262. [https://doi.org/10.1016/S0031-0182\(00\)00189-9](https://doi.org/10.1016/S0031-0182(00)00189-9)
- Edwards, M.E., n.d. Unpublished data.

- Edwards, M., Franklin-Smith, L., Clarke, C., Baker, J., Hill, S., Gallagher, K., 2015. The role of fire in the mid-Holocene arrival and expansion of lodgepole pine (*Pinus contorta* var. *latifolia* Engelm. ex S. Watson) in Yukon, Canada. *The Holocene* 25, 64–78. <https://doi.org/10.1177/0959683614556389>
- Eide, W., Birks, H.H., Bigelow, N.H., Peglar, S.M., Birks, H.J.B., 2005. Holocene forest development along the Setesdal valley, southern Norway, reconstructed from macrofossil and pollen evidence. *Vegetation History and Archaeobotany* 15, 65–85. <https://doi.org/10.1007/s00334-005-0025-7>
- Ejarque, A., Julià, R., Reed, J.M., Mesquita-Joanes, F., Marco-Barba, J., Riera, S., 2016. Coastal evolution in a Mediterranean microtidal zone: mid to late Holocene natural dynamics and human management of the Castelló lagoon, NE Spain. *PLOS ONE* 11, e0155446. <https://doi.org/10.1371/journal.pone.0155446>
- El-Guellab, A., Asselin, H., Gauthier, S., Bergeron, Y., Ali, A.A., 2015. Holocene variations of wildfire occurrence as a guide for sustainable management of the northeastern Canadian boreal forest. *Forest Ecosystems* 2, 1–7. <https://doi.org/10.1186/s40663-015-0039-2>
- Ellis, C.J., Tallis, J.H., 2001. Climatic control of peat erosion in a North Wales blanket mire. *New Phytologist* 152, 313–324. <https://doi.org/10.1046/j.0028-646x.2001.00259.x>
- Ellis, C.J., Tallis, J.H., 2000. Climatic control of blanket mire development at Kentra Moss, north-west Scotland. *Journal of Ecology* 88, 869–889. <https://doi.org/10.1046/j.1365-2745.2000.00495.x>
- Ellison, J., 2005. Holocene palynology and sea-level change in two estuaries in Southern Irian Jaya. *Palaeogeography, Palaeoclimatology, Palaeoecology* 220, 291–309. <https://doi.org/10.1016/j.palaeo.2005.01.008>
- Fan, B., Zhang, W., Zhang, R., Yang, X., Li, Y., Li, B., Ding, G., 2019. Characteristics of dry-wet changes and human activities in the North China Plain since the Little Ice Age. *Quaternary Sciences* 39, 483–496. <https://doi.org/10.11928/j.issn.1001-7410.2019.02.20>
- Feurdean, A., 2005. Long-term forest fires reconstruction and vegetation dynamics in the Gutaiului Mountains. *Studia Universitatis Văsiile GoldisĂrad. Seria Stiintele Vietii (Life Sciences Series)* 15, 99–104.
- Feurdean, A., Florescu, G., Tanțău, I., Vanni ere, B., Diaconu, A.-C., Pfeiffer, M., Warren, D., Hutchinson, S.M., Gorina, N., Gařka, M., Kirpotin, S., 2020. Recent fire regime in the southern boreal forests of western Siberia is unprecedented in the last five millennia. *Quaternary Science Reviews* 244, 106495. <https://doi.org/10.1016/j.quascirev.2020.106495>
- Feurdean, A., Florescu, G., Vanni ere, B., Tanțău, I., O’Hara, R.B., Pfeiffer, M., Hutchinson, S.M., Gařka, M., Moskal-del Hoyo, M., Hickler, T., 2017. Fire has been an important driver of forest dynamics in the Carpathian Mountains during the Holocene. *Forest Ecology and Management* 389, 15–26. <https://doi.org/10.1016/j.foreco.2016.11.046>
- Feurdean, A., Gařka, M., Florescu, G., Diaconu, A.-C., Tanțău, I., Kirpotin, S., Hutchinson, S.M., 2019. 2000 years of variability in hydroclimate and carbon accumulation in western Siberia and the relationship with large-scale atmospheric circulation: a multi-proxy peat record. *Quaternary Science Reviews* 226, 105948. <https://doi.org/10.1016/j.quascirev.2019.105948>
- Feurdean, A., Gařka, M., Kuske, E., Tanțău, I.I., Lamentowicz, M., Florescu, G., Liakka, J., Hutchinson, S.M., Mulch, A., Hickler, T., 2015. Last millennium hydro-climate variability in central–eastern Europe (northern Carpathians, Romania). *The Holocene* 25, 1179–1192. <https://doi.org/10.1177/0959683615580197>
- Feurdean, A., Grindean, R., Florescu, G., Tanțău, I., Niedermeyer, E.M., Diaconu, A.-C., Hutchinson, S.M., Nielsen, A.B., Sava, T., Panait, A., Braun, M., Hickler, T., 2021. The transformation of the forest steppe in the lower Danube Plain of southeastern Europe: 6000 years of vegetation and land use dynamics. *Biogeosciences* 18, 1081–1103. <https://doi.org/10.5194/bg-18-1081-2021>
- Feurdean, A., Liakka, J., Vanni ere, B., Marinova, E., Hutchinson, S.M., Mosburgger, V., Hickler, T., 2013. 12,000-Years of fire regime drivers in the lowlands of Transylvania (Central-Eastern Europe): a data-

- model approach. *Quaternary Science Reviews* 81, 48–61.  
<https://doi.org/10.1016/j.quascirev.2013.09.014>
- Feurdean, A., Mosbrugger, V., Onac, B.P., Polyak, V., Veres, D., 2007. Younger Dryas to mid-Holocene environmental history of the lowlands of NW Transylvania, Romania. *Quaternary Research* 68, 364–378. <https://doi.org/10.1016/j.yqres.2007.08.003>
- Feurdean, A.N., Willis, K.J., Astaloş, C., 2009. Legacy of the past land-use changes and management on the 'natural' upland forest composition in the Apuseni Natural Park, Romania. *The Holocene* 19, 967–981. <https://doi.org/10.1177/0959683609337358>
- Feurdean, A., Tonkov, S., Pfeiffer, M., Panait, A., Warren, D., Vanni ere, B., Marinova, E., 2019. Fire frequency and intensity associated with functional traits of dominant forest type in the Balkans during the Holocene. *European Journal of Forest Research* 138, 1049–1066.  
<https://doi.org/10.1007/s10342-019-01223-0>
- Feurdean, A., Vanni ere, B., Finsinger, W., Warren, D., Connor, S.C., Forrest, M., Liakka, J., Panait, A., Werner, C., Andri c, M., Bobek, P., Carter, V.A., Davis, B., Diaconu, A.-C., Dietze, E., Feeser, I., Florescu, G., Ga ka, M., Giesecke, T., Jahns, S., Jamrichova, E., Kajuka o, K., Kaplan, J., Karpi nska-Ko aczek, M., Ko aczek, P., Kuneš, P., Kupriyanov, D., Lamentowicz, M., Lemmen, C., Magyari, E.K., Marcisz, K., Marinova, E., Niamir, A., Novenko, E., Obremaska, M., P edziszewska, A., Pfeiffer, M., Poska, A., R osch, M., S łowi nski, M., Stan cikait e, M., Szal, M., Świ ęta-Musznicka, J., Tan ţau, I., Theuerkauf, M., Tonkov, S., Valk o, O., Vassiljev, J., Veski, S., Vincze, I., Wacnik, A., Wiethold, J., Hickler, T., 2020. Fire hazard modulation by long-term dynamics in land cover and dominant forest type in eastern and central Europe. *Biogeosciences* 17, 1213–1230. <https://doi.org/10.5194/bg-17-1213-2020>
- Feurdean, A., Veski, S., Florescu, G., Vanni ere, B., Pfeiffer, M., O'Hara, R.B., Stivrins, N., Amon, L., Heinsalu, A., Vassiljev, J., Hickler, T., 2017. Broadleaf deciduous forest counterbalanced the direct effect of climate on Holocene fire regime in hemiboreal/boreal region (NE Europe). *Quaternary Science Reviews* 169, 378–390. <https://doi.org/10.1016/j.quascirev.2017.05.024>
- Feurdean, A., Willis, K.J., 2008. The usefulness of a long-term perspective in assessing current forest conservation management in the Apuseni Natural Park, Romania. *Forest Ecology and Management* 256, 421–430. <https://doi.org/10.1016/j.foreco.2008.04.050>
- Field, J.H., Dodson, J.R., Prosser, I.P., 2002. A Late Pleistocene vegetation history from the Australian semi-arid zone. *Quaternary Science Reviews* 21, 1023–1037. [https://doi.org/10.1016/s0277-3791\(01\)00057-9](https://doi.org/10.1016/s0277-3791(01)00057-9)
- Finch, J., Marchant, R., Mustaphi, C.J.C., 2016. Ecosystem change in the South Pare Mountain bloc, Eastern Arc Mountains of Tanzania. *The Holocene* 27, 796–810.  
<https://doi.org/10.1177/0959683616675937>
- Finney, B.P., Krumhardt, A.P., 2004. Sediment, pollen, and charcoal analyses of an unnamed lake in the White Mountains recreational area, interior Alaska of Land Management northern field office, Fairbanks, Alaska. The Bureau.
- Finsinger, W., Fevre, J., Orban, I., Pal, I., Vincze, I., Hubay, K., Birks, H.H., Braun, M., Toth, M., Magyari, E.K., 2018. Holocene fire-regime changes near the treeline in the Retezat Mts. (Southern Carpathians, Romania). *Quaternary International* 477, 94–105. <https://doi.org/10.1016/j.quaint.2016.04.029>
- Finsinger, W., Tinner, W., 2007. Pollen and plant macrofossils at Lac de Fully (2135 m a.s.l.): Holocene forest dynamics on a highland plateau in the Valais, Switzerland. *The Holocene* 17, 1119–1127.  
<https://doi.org/10.1177/0959683607082552>
- Finsinger, W., Tinner, W., 2006. Holocene vegetation and land-use changes in response to climatic changes in the forelands of the southwestern Alps, Italy. *Journal of Quaternary Science* 21, 243–258.  
<https://doi.org/10.1002/jqs.971>



- Flannigan, M., Campbell, I., Wotton, M., Carcaillet, C., Richard, P.J.H., Bergeron, Y., 2001. Future fire in Canada's boreal forest: paleoecology results and general circulation model - regional climate model simulations. *Canadian Journal of Forest Research* 31, 854–864. <https://doi.org/10.1139/x01-010>
- Florescu, G., Hutchinson, S.M., Kern, Z., Mîndrescu, M., Cristea, I.A., Mihăilă, D., Lokas, E., Feurdean, A., 2017. Last 1000 years of environmental history in southern Bucovina, Romania: A high resolution multi-proxy lacustrine archive. *Palaeogeography, Palaeoclimatology, Palaeoecology* 473, 26–40. <https://doi.org/10.1016/j.palaeo.2017.01.047>
- Florescu, G., Vanni ere, B., Feurdean, A., 2018. Exploring the influence of local controls on fire activity using multiple charcoal records from northern Romanian Carpathians. *Quaternary International* 488, 41–57. <https://doi.org/10.1016/j.quaint.2018.03.042>
- Fossitt, J.A., 1996. Late Quaternary vegetation history of the Western Isles of Scotland. *New Phytologist* 132, 171–196. <https://doi.org/10.1111/j.1469-8137.1996.tb04522.x>
- Fossitt, J.A., 1994. Late-glacial and Holocene vegetation history of western Donegal, Ireland, in: *Biology and Environment: Proceedings of the Royal Irish Academy*. JSTOR, pp. 1–31.
- Foster, D.R., Clayden, S., Orwig, D.A., Hall, B., Barry, S., 2002. Oak, chestnut and fire: climatic and cultural controls of long-term forest dynamics in New England, USA. *Journal of Biogeography* 29, 1359–1379. <https://doi.org/10.1046/j.1365-2699.2002.00760.x>
- Foster, D.R., Hall, B., Barry, S., Clayden, S., Parshall, T., 2002. Cultural, environmental and historical controls of vegetation patterns and the modern conservation setting on the island of Martha's Vineyard, USA. *Journal of Biogeography* 29, 1381–1400. <https://doi.org/10.1046/j.1365-2699.2002.00761.x>
- Francis, D.R., Foster, D.R., 2001. Response of small New England ponds to historic land use. *The Holocene* 11, 301–312. <https://doi.org/10.1191/095968301666282469>
- Franco-M ugica, F., Garc ıa-Ant on, M., Maldonado-Ruiz, J., Morla-Juaristi, C., Sainz-Ollero, H., 2005. Ancient pine forest on inland dunes in the Spanish northern meseta. *Quaternary Research* 63, 1–14. <https://doi.org/10.1016/j.yqres.2004.08.004>
- Fran ois, n.d. Unpublished data.
- Franklin-Smith, L., 2007. Boreal Forest Fire History in Alaska and the Yukon (PhD thesis). University of Southampton, Southampton, UK.
- Frechette, J.D., 2007. Millennial-Scale Changes in Fan Deposition and Fire Severity in Ponderosa Pine Forests, Sacramento Mountains, New Mexico (MSc thesis). Department of Earth; Planetary Sciences, University of New Mexico, Albuquerque, New Mexico, USA.
- Froyd, C.A., 2006. Holocene fire in the Scottish Highlands: evidence from macroscopic charcoal records. *The Holocene* 16, 235–249. <https://doi.org/10.1191/0959683606hl910rp>
- Fuller, J.L., 1997. Holocene forest dynamics in southern Ontario, Canada: fine-resolution pollen data. *Canadian Journal of Botany* 75, 1714–1727. <https://doi.org/10.1139/b97-886>
- Fuller, J.L., Foster, D.R., McLachlan, J.S., Drake, N., 1998. Impact of human activity on regional forest composition and dynamics in central New England. *Ecosystems* 1, 76–95. <https://doi.org/10.1007/s100219900007>
- Fyfe, R.M., Brown, A.G., Rippon, S.J., 2003. Mid-to late-Holocene vegetation history of Greater Exmoor, UK: estimating the spatial extent of human-induced vegetation change. *Vegetation History and Archaeobotany* 12, 215–232. <https://doi.org/10.1007/s00334-003-0018-3>
- Gajewski, K., 2019. Environmental history of the northwestern Qu ebec treeline. *Quaternary Science Reviews* 206, 29–43. <https://doi.org/10.1016/j.quascirev.2018.12.025>
- Gajewski, K., Bunbury, J., Vetter, M., Kroeker, N., Khan, A.H., 2014. Paleoenvironmental studies in southwestern Yukon. *Arctic* 67, 58–70. <https://doi.org/10.14430/arctic.2012.12-105>
- Gajewski, K., Swain, A.M., Peterson, G.M., 1987. Late Holocene pollen stratigraphy in four northeastern United States lakes. *G ographie physique et Quaternaire* 41, 377–386. <https://doi.org/10.7202/032693ar>

- Gajewski, K., Winkler, M.G., Swain, A.M., 1985. Vegetation and fire history from three lakes with varved sediments in northwestern Wisconsin (U.S.A.). *Review of Palaeobotany and Palynology* 44, 277–292. [https://doi.org/10.1016/0034-6667\(85\)90021-1](https://doi.org/10.1016/0034-6667(85)90021-1)
- Galop, D., Carozza, L., Marembert, F., Bal, M.-C., 2004. Activités agropastorales et climat durant l'Âge du Bronze dans les Pyrénées: l'état de la question à la lumière des données environnementales et archéologiques, in: *Eclipse 2èmes prises et déprises agricoles, expansion et régression des sociétés entre 3500 et 2500 BP*. CTHS, pp. 107–119.
- Gao, C., Knorr, K.-H., Yu, Z., He, J., Zhang, S., Lu, X., Wang, G., 2016. Black carbon deposition and storage in peat soils of the Changbai Mountain, China. *Geoderma* 273, 98–105. <https://doi.org/10.1016/j.geoderma.2016.03.021>
- Gao, C., Lin, Q., Zhang, S., He, J., Lu, X., Wang, G., 2014. Historical trends of atmospheric black carbon on Sanjiang Plain as reconstructed from a 150-year peat record. *Scientific Reports* 4, 1–7. <https://doi.org/10.1038/srep05723>
- Gao, X., 2017. Recent 100-yr Environmental Evolution in Oxbow Lake of Yangtze River Recorded by Pollen and Charcoal: a Case Study in Oxbow Lakes of the Middle Yangtze River Located in Jingzhou City, Hubei Province (PhD thesis). Shanghai Normal University, Shanghai, China.
- Gardner, A.R., 2002. Neolithic to Copper Age woodland impacts in northeast Hungary? Evidence from the pollen and sediment chemistry records. *The Holocene* 12, 541–553. <https://doi.org/10.1191/0959683602h1561rp>
- Gauthier, R., 1981. Histoire de la Colonisation Végétale des Montérégiennes: Deux Sites du Mont Saint-Bruno (MSc thesis). Université de Montréal, Montreal, Quebec, Canada.
- Gavin, D.G., Brubaker, L.B., 2015. Late Quaternary vegetation and fire history of the Olympic Peninsula, in: Gavin, D.G., Brubaker, L.B. (Eds.), *Late Pleistocene and Holocene Environmental Change on the Olympic Peninsula*, Washington, Ecological Studies. Springer International Publishing, Cham, Switzerland, pp. 61–106. [https://doi.org/10.1007/978-3-319-11014-1\\_4](https://doi.org/10.1007/978-3-319-11014-1_4)
- Gavin, D.G., Brubaker, L.B., Greenwald, D.N., 2013. Postglacial climate and fire-mediated vegetation change on the western Olympic Peninsula, Washington (USA). *Ecological Monographs* 83, 471–489. <https://doi.org/10.1890/12-1742.1>
- Gavin, D.G., Brubaker, L.B., Lertzman, K.P., 2003. An 1800-year record of the spatial and temporal distribution of fire from the west coast of Vancouver Island, Canada. *Canadian Journal of Forest Research* 33, 573–586. <https://doi.org/10.1139/x02-196>
- Gavin, D.G., Hu, F.S., Lertzman, K., Corbett, P., 2006. Weak climatic control of stand-scale fire history during the late Holocene. *Ecology* 87, 1722–1732. [https://doi.org/10.1890/0012-9658\(2006\)87\[1722:wccosf\]2.0.co;2](https://doi.org/10.1890/0012-9658(2006)87[1722:wccosf]2.0.co;2)
- Gavin, D.G., McLachlan, J.S., Brubaker, L.B., Young, K.A., 2001. Postglacial history of subalpine forests, Olympic Peninsula, Washington, USA. *The Holocene* 11, 177–188. <https://doi.org/10.1191/095968301670879949>
- Gałka, M., Aunina, L., Feurdean, A., Hutchinson, S., Kołaczek, P., Apolinarska, K., 2017. Rich fen development in CE Europe, resilience to climate change and human impact over the last ca. 3500 years. *Palaeogeography, Palaeoclimatology, Palaeoecology* 473, 57–72. <https://doi.org/10.1016/j.palaeo.2017.02.030>
- Gałka, M., Aunina, L., Tobolski, K., Feurdean, A., 2016. Development of rich fen on the SE Baltic Coast, Latvia, during the last 7500 years, using paleoecological proxies: implications for plant community development and paleoclimatic research. *Wetlands* 36, 689–703. <https://doi.org/10.1007/s13157-016-0779-y>
- Gałka, M., Miotk-Szpiganowicz, G., Goslar, T., Jęśko, M., van der Knaap, W.O., Lamentowicz, M., 2013. Palaeohydrology, fires and vegetation succession in the southern Baltic during the last 7500 years reconstructed from a raised bog based on multi-proxy data. *Palaeogeography, Palaeoclimatology, Palaeoecology* 370, 209–221. <https://doi.org/10.1016/j.palaeo.2012.12.011>

- Gałka, M., Obremska, M., n.d. Unpublished data.
- Gałka, M., Szal, M., Broder, T., Loisel, J., Knorr, K.-H., 2019. Peatbog resilience to pollution and climate change over the past 2700 years in the Harz Mountains, Germany. *Ecological Indicators* 97, 183–193. <https://doi.org/10.1016/j.ecolind.2018.10.015>
- Geantă, A., Gałka, M., Tanțău, I., Hutchinson, S.M., Mîndrescu, M., Feurdean, A., 2014. High mountain region of the Northern Romanian Carpathians responded sensitively to Holocene climate and land use changes: a multi-proxy analysis. *The Holocene* 24, 944–956. <https://doi.org/10.1177/0959683614534747>
- Gearey, B.R., Charman, D.J., Kent, M., 2000. Palaeoecological evidence for the prehistoric settlement of Bodmin Moor, Cornwall, southwest England. Part I: The status of woodland and early human impacts. *Journal of Archaeological Science* 27, 423–438. <https://doi.org/10.1006/jasc.1999.0472>
- Gebru, T., Eshetu, Z., Huang, Y., Woldemariam, T., Strong, N., Umer, M., DiBlasi, M., Terwilliger, V.J., 2009. Holocene palaeovegetation of the Tigray Plateau in northern Ethiopia from charcoal and stable organic carbon isotopic analyses of gully sediments. *Palaeogeography, Palaeoclimatology, Palaeoecology* 282, 67–80. <https://doi.org/10.1016/j.palaeo.2009.08.011>
- Geiss, C.E., Umbanhowar Jr, C.E., Camill, P., Banerjee, S.K., 2003. Sediment magnetic properties reveal Holocene climate change along the Minnesota prairie-forest ecotone. *Journal of Paleolimnology* 30, 151–166. <https://doi.org/10.1023/A:1025574100319>
- Gell, P.A., Stuart, I.-M., Smith, J.D., 1993. The response of vegetation to changing fire regimes and human activity in East Gippsland, Victoria, Australia. *The Holocene* 3, 150–160. <https://doi.org/10.1177/095968369300300206>
- Genever, M., Grindrod, J., Barker, B., 2003. Holocene palynology of Whitehaven Swamp, Whitsunday Island, Queensland, and implications for the regional archaeological record. *Palaeogeography, Palaeoclimatology, Palaeoecology* 201, 141–156. [https://doi.org/10.1016/S0031-0182\(03\)00542-X](https://doi.org/10.1016/S0031-0182(03)00542-X)
- Genries, A., Finsinger, W., Asnong, H., Bergeron, Y., Carcaillet, C., Garneau, M., Hély, C., Ali, A.A., 2012. Local versus regional processes: can soil characteristics overcome climate and fire regimes by modifying vegetation trajectories? *Journal of Quaternary Science* 27, 745–756. <https://doi.org/10.1002/jqs.2560>
- Genries, A., Mercier, L., Lavoie, M., Muller, S.D., Radakovitch, O., Carcaillet, C., 2009. The effect of fire frequency on local cembra pine populations. *Ecology* 90, 476–486. <https://doi.org/10.1890/07-1740.1>
- Genries, A., Muller, S., Bircker, L., Mercier, L., Carcaillet, C., 2009. Local-scale processes control spatial variability of subalpine vegetation trajectories during the Holocene in the Maurienne valley (French Alps). *Ecoscience* 16, 13–24.
- Giesecke, T., 2005a. Holocene dynamics of the southern boreal forest in Sweden. *The Holocene* 15, 858–872. <https://doi.org/10.1191/0959683605hl859ra>
- Giesecke, T., 2005b. Holocene forest development in the central Scandes Mountains, Sweden. *Vegetation History and Archaeobotany* 14, 133–147. <https://doi.org/10.1007/s00334-005-0070-2>
- Giesecke, T., 2001. Pollenanalytische und sedimentchemische Untersuchungen zur natürlichen und anthropogenen Geschichte im Schlaubetal. *Sitz Naturforsch Freunde Berlin* 39, 89–112.
- Gill, J.L., Williams, J.W., Jackson, S.T., Lininger, K.B., Robinson, G.S., 2009. Pleistocene megafaunal collapse, novel plant communities, and enhanced fire regimes in North America. *Science* 326, 1100–1103. <https://doi.org/10.1126/science.1179504>
- Gillespie, R., Magee, J.W., Luly, J.G., Dlugokencky, E., Sparks, R.J., Wallace, G., 1991. AMS radiocarbon dating in the study of arid environments: examples from Lake Eyre, South Australia. *Palaeogeography, Palaeoclimatology, Palaeoecology* 84, 333–338. [https://doi.org/10.1016/0031-0182\(91\)90052-S](https://doi.org/10.1016/0031-0182(91)90052-S)

- Gil-Romera, G., Adolf, C., Benito, B.M., Bittner, L., Johansson, M.U., Grady, D.A., Lamb, H.F., Lemma, B., Fekadu, M., Glaser, B., Mekonnen, B., Sevilla-Callejo, M., Zech, M., Zech, W., Miede, G., 2019. Long-term fire resilience of the Ericaceous belt, Bale Mountains, Ethiopia. *Biology Letters* 15, 20190357.
- Githumbi, E.N., Kariuki, R., Shoemaker, A., Courtney-Mustaphi, C.J., Chuhilla, M., Richer, S., Lane, P., Marchant, R., 2018. Pollen, people and place: multidisciplinary perspectives on ecosystem change at Amboseli, Kenya. *Frontiers in Earth Science* 5. <https://doi.org/10.3389/feart.2017.00113>
- Githumbi, E.N., Mustaphi, C.J.C., Yun, K.J., Muiruri, V., Rucina, S.M., Marchant, R., 2018. Late Holocene wetland transgression and 500 years of vegetation and fire variability in the semi-arid Amboseli landscape, southern Kenya. *Ambio* 47, 682–696. <https://doi.org/10.1007/s13280-018-1014-2>
- Glückler, R., Herzschuh, U., Kruse, S., Andreev, A., Vyse, S.A., Winkler, B., Biskaborn, B.K., Pestryakova, L., Dietze, E., 2021. Wildfire history of the boreal forest of southwestern Yakutia (Siberia) over the last two millennia documented by a lake-sedimentary charcoal record. *Biogeosciences* 18, 4185–4209. <https://doi.org/10.5194/bg-18-4185-2021>
- Glückler, R., Herzschuh, U., Kruse, S., Andreev, A., Vyse, S.A., Winkler, B., Biskaborn, B.K., Pestryakova, L., Dietze, E., 2020. Macroscopic charcoal record from Lake Khamra, Yakutia, Russia. <https://doi.org/10.1594/PANGAEA.923773>
- Glückler, R., Herzschuh, U., Vyse, S.A., Dietze, E., 2020a. Macroscopic charcoal counts from Lake Khamra, Yakutia, Russia. <https://doi.org/10.1594/PANGAEA.923769>
- Glückler, R., Herzschuh, U., Vyse, S.A., Dietze, E., 2020b. Radiocarbon age dating results from Lake Khamra, Yakutia, Russia. <https://doi.org/10.1594/PANGAEA.923772>
- Glückler, R., Herzschuh, U., Vyse, S.A., Dietze, E., 2020c. Radiometric age dating results for 210Pb and 137Cs from Lake Khamra, Yakutia, Russia. <https://doi.org/10.1594/PANGAEA.923770>
- Gobet, E., Tinner, W., Hochuli, P.A., van Leeuwen, J.F.N., Ammann, B., 2003. Middle to Late Holocene vegetation history of the Upper Engadine (Swiss Alps): the role of man and fire. *Vegetation History and Archaeobotany* 12, 143–163. <https://doi.org/10.1007/s00334-003-0017-4>
- Goman, M., Byrne, R., 1998. A 5000-year record of agriculture and tropical forest clearance in the Tuxtlas, Veracruz, Mexico. *The Holocene* 8, 83–89. <https://doi.org/10.1191/095968398670396093>
- González-Sampériz, P., Valero-Garcés, B.L., Moreno, A., Jalut, G., García-Ruiz, J.M., Martí-Bono, C., Delgado-Huertas, A., Navas, A., Otto, T., Dedoubat, J.J., 2006. Climate variability in the Spanish Pyrenees during the last 30,000 yr revealed by the El Portalet sequence. *Quaternary Research* 66, 38–52. <https://doi.org/10.1016/j.yqres.2006.02.004>
- Gosling, W.D., de Kruif, J., Norder, S.J., de Boer, E.J., Hooghiemstra, H., Rijdsdijk, K.F., McMichael, C.N.H., 2017. Mauritius on fire: tracking historical human impacts on biodiversity loss. *Biotropica* 49, 778–783. <https://doi.org/10.1111/btp.12490>
- Greisman, A., Gaillard, M.-J., 2009. The role of climate variability and fire in early and mid Holocene forest dynamics of southern Sweden. *Journal of Quaternary Science* 24, 593–611. <https://doi.org/10.1002/jqs.1241>
- Grigg, L.D., Whitlock, C., 1998. Late-glacial vegetation and climate change in western Oregon. *Quaternary Research* 49, 287–298. <https://doi.org/10.1006/qres.1998.1966>
- Grimm, E.C., 2011. High-resolution age model based on AMS radiocarbon ages for Kettle Lake, North Dakota, USA. *Radiocarbon* 53, 39–53. <https://doi.org/10.1017/s0033822200034342>
- Grimm, E.C., Donovan, J.J., Brown, K.J., 2011. A high-resolution record of climate variability and landscape response from Kettle Lake, northern Great Plains, North America. *Quaternary Science Reviews* 30, 2626–2650. <https://doi.org/10.1016/j.quascirev.2011.05.015>
- Grimm, E.C., Jacobson, G.L., Watts, W.A., Hansen, B.C.S., Maasch, K.A., 1993. A 50,000-year record of climate oscillations from Florida and its temporal correlation with the Heinrich events. *Science* 261, 198–200. <https://doi.org/10.1126/science.261.5118.198>



- Grimm, E.C., Watts, W.A., Jacobson Jr., G.L., Hansen, B.C.S., Almquist, H.R., Dieffenbacher-Krall, A.C., 2006. Evidence for warm wet Heinrich events in Florida. *Quaternary Science Reviews* 25, 2197–2211. <https://doi.org/10.1016/j.quascirev.2006.04.008>
- Grudzinska, I., Vassiljev, J., Saarse, L., Reitalu, T., Veski, S., 2017. Past environmental change and seawater intrusion into coastal Lake Lilaste, Latvia. *Journal of Paleolimnology* 57, 257–271. <https://doi.org/10.1007/s10933-017-9945-3>
- Gu, Y., Pearsall, D.M., Xie, S., Yu, J., 2007. Vegetation and fire history of a Chinese site in southern tropical Xishuangbanna derived from phytolith and charcoal records from Holocene sediments. *Journal of Biogeography* 0, 070821084123002–???. <https://doi.org/10.1111/j.1365-2699.2007.01763.x>
- Haas, J.N., Hadorn, P., 1998. Die vegetations-und kulturlandschaftsgeschichte des Seebachtals von der Mittelsteinzeit bis zum frühmittelalter anhand von pollenanalysen. *Das Seebachtal—Eine archäologische und paläoökologische bestandesaufnahme*. *Archäologie im Thurgau* 221–255.
- Haberle, S.G., 2007. Was the early Holocene characterised by El Niño-like or La Niña-like conditions? Evidence from terrestrial archives in the Western Pacific Warm Pool region, in: XVII INQUA Congress. Quaternary International, Cairns, Queensland, Australia, p. 150.
- Haberle, S.G., 2005. A 23,000-yr pollen record from Lake Euramoo, wet tropics of NE Queensland, Australia. *Quaternary Research* 64, 343–356. <https://doi.org/10.1016/j.yqres.2005.08.013>
- Haberle, S.G., 1996. Explanations for palaeoecological changes on the northern plains of Guadalcanal, Solomon Islands: the last 3200 years. *The Holocene* 6, 333–338. <https://doi.org/10.1177/095968369600600307>
- Haberle, S.G., Bennett, K.D., 2004. Postglacial formation and dynamics of North Patagonian rainforest in the Chonos Archipelago, Southern Chile. *Quaternary Science Reviews* 23, 2433–2452. <https://doi.org/10.1016/j.quascirev.2004.03.001>
- Haberle, S.G., Hope, G.S., DeFretes, Y., 1991. Environmental change in the Baliem Valley, montane Irian Jaya, Republic of Indonesia. *Journal of Biogeography* 18, 25–40. <https://doi.org/10.2307/2845242>
- Haberle, S.G., Hope, G.S., van der Kaars, S., 2001. Biomass burning in Indonesia and Papua New Guinea: natural and human induced fire events in the fossil record. *Palaeogeography, Palaeoclimatology, Palaeoecology* 171, 259–268. [https://doi.org/10.1016/S0031-0182\(01\)00248-6](https://doi.org/10.1016/S0031-0182(01)00248-6)
- Haberle, S.G., Ledru, M.-P., 2001. Correlations among charcoal records of fires from the past 16,000 years in Indonesia, Papua New Guinea, and Central and South America. *Quaternary Research* 55, 97–104. <https://doi.org/10.1006/qres.2000.2188>
- Haberle, S.G., Stevenson, J., Black, M.P., Mooney, S.D., Sniderman, J.M.K., Willis, K.J., Bennett, K.D., 2005. Fire in the Tropics: a paleoclimatic assessment of charcoal records from the Western Pacific Warm Pool region, in: Prog. abstr. of the AGU Chapman Conference on Tropical-Extratropical Climate Teleconnections, A Long-Term Perspective. University of Hawaii, Honolulu, Hawaii, USA.
- Haberzettl, T., Fey, M., Lücke, A., Maidana, N., Mayr, C., Ohlendorf, C., Schäbitz, F., Schleser, G.H., Wille, M., Zolitschka, B., 2005. Climatically induced lake level changes during the last two millennia as reflected in sediments of Laguna Potrok Aike, southern Patagonia (Santa Cruz, Argentina). *Journal of Paleolimnology* 33, 283–302. <https://doi.org/10.1007/s10933-004-5331-z>
- Haberzettl, T., Wille, M., Fey, M., Janssen, S., Lücke, A., Mayr, C., Ohlendorf, C., Schäbitz, F., Schleser, G.H., Zolitschka, B., 2006. Environmental change and fire history of southern Patagonia (Argentina) during the last five centuries. *Quaternary international* 158, 72–82. <https://doi.org/10.1016/j.quaint.2006.05.029>
- Hajdas, I., Lowe, D.J., Newnham, R.M., Bonani, G., 2006. Timing of the late-glacial climate reversal in the Southern Hemisphere using high-resolution radiocarbon chronology for Kaipo Bog, New Zealand. *Quaternary Research* 65, 340–345. <https://doi.org/10.1016/j.yqres.2005.08.028>
- Haliuc, A., Hutchinson, S.M., Florescu, G., Feurdean, A., 2016. The role of fire in landscape dynamics: an example of two sediment records from the Rodna Mountains, northern Romanian Carpathians. *Catena* 137, 432–440. <https://doi.org/10.1016/j.catena.2015.10.021>

- Hallett, D.J., Anderson, R.S., 2010. Paleofire reconstruction for high-elevation forests in the Sierra Nevada, California, with implications for wildfire synchrony and climate variability in the late Holocene. *Quaternary Research* 73, 180–190. <https://doi.org/10.1016/j.yqres.2009.11.008>
- Hallett, D.J., Lepofsky, D.S., Mathewes, R.W., Lertzman, K.P., 2003. 11,000 years of fire history and climate in the mountain hemlock rain forests of southwestern British Columbia based on sedimentary charcoal. *Canadian Journal of Forest Research* 33, 292–312. <https://doi.org/10.1139/x02-177>
- Hallett, D., Walker, R., 2000. Paleoecology and its application to fire and vegetation management in Kootenay National Park, British Columbia. *Journal of Paleolimnology* 24, 401–414. <https://doi.org/10.1023/A:1008110804909>
- Han, Y.P., 2000. Vegetation and Environment Change During Holocene in Zhouyuan (Qishan) Region (PhD thesis). Shanxi Normal University, Xi'an, China.
- Hansen, B.C.S., Rodbell, D.T., Seltzer, G.O., León, B., Young, K.R., Abbott, M., 2003. Late-glacial and Holocene vegetational history from two sites in the western Cordillera of southwestern Ecuador. *Palaeogeography, Palaeoclimatology, Palaeoecology* 194, 79–108. [https://doi.org/10.1016/S0031-0182\(03\)00272-4](https://doi.org/10.1016/S0031-0182(03)00272-4)
- Hapsari, K.A., Biagioni, S., Jennerjahn, T.C., Reimer, P., Saad, A., Sabiham, S., Behling, H., 2018. Resilience of a peatland in Central Sumatra, Indonesia to past anthropogenic disturbance: Improving conservation and restoration designs using palaeoecology. *Journal of Ecology* 106, 2473–2490. <https://doi.org/10.1111/1365-2745.13000>
- Harle, K.J., Heijnis, H., Chisari, R., Kershaw, A.P., Zoppi, U., Jacobsen, G., 2002. A chronology for the long pollen record from Lake Wangoom, western Victoria (Australia) as derived from uranium/thorium disequilibrium dating. *Journal of Quaternary Science* 17, 707–720. <https://doi.org/10.1002/jqs.684>
- Harvey, W.J., Nogué, S., Stansell, N., Petrokofsky, G., Steinman, B., Willis, K.J., 2019. The legacy of Pre-Columbian fire on the pine–oak forests of upland Guatemala. *Frontiers in Forests and Global Change* 2, 34. <https://doi.org/10.3389/ffgc.2019.00034>
- Hayashi, R., Inoue, J., Makino, M., Takahara, H., 2012. Vegetation history during the last 17,000 years around Sonenuma Swamp in the eastern shore area of Lake Biwa, western Japan: With special reference to changes in species composition of *Quercus* subgenus *Lepidobalanus* trees based on SEM pollen morphology. *Quaternary International* 254, 99–106. <https://doi.org/10.1016/j.quaint.2010.08.011>
- Hayashida, A., Ali, M., Kuniko, Y., Kitagawa, H., Torii, M., Takemura, K., 2007. Environmental magnetic record and paleosecular variation data for the last 40 kyrs from the Lake Biwa sediments, Central Japan. *Earth, Planets and Space* 59, 807–814. <https://doi.org/10.1186/BF03352743>
- Hájková, P., Jamrichová, E., Horsák, M., Hájek, M., 2013. Holocene history of a *Cladium mariscus*-dominated calcareous fen in Slovakia: vegetation stability and landscape development. *Preslia* 85, 289–315.
- Håkansson, S., 1984. University of Lund Radiocarbon Dates XVII. *Radiocarbon* 26, 392–411. <https://doi.org/10.1017/s0033822200006767>
- He, J., Gao, C., Cong, J., Zhong, J., Han, D., Wang, G., 2017. Historical pyrogenic sources of black carbon during the last 150 years in the Great Hinggan Mountains, northeast China. *Journal of Soils and Sediments* 18, 708–717. <https://doi.org/10.1007/s11368-017-1825-y>
- He, J., Gao, C., Lin, Q., Zhang, S., Zhao, W., Lu, X., Wang, G., 2015. Temporal and spatial changes in black carbon sedimentary processes in wetlands of Songnen Plain, northeast of China. *PLOS ONE* 10, e0140834. <https://doi.org/10.1371/journal.pone.0140834>
- Head, L., 1988. Holocene vegetation, fire and environmental history of the Discovery Bay region, southwestern Victoria. *Austral Ecology* 13, 21–49. <https://doi.org/10.1111/j.1442-9993.1988.tb01415.x>
- Head, L., Stuart, I.-M.F., 1980. Change in the Aire - Palaeoecology and prehistory in the Aire Basin, southwestern Victoria. *Monash Publications in Geography* 1–97.

- Herrmann, M., Lu, X., Berking, J., Schütt, B., Yao, T., Mosbrugger, V., 2010. Reconstructing Holocene vegetation and climate history of Nam Co area (Tibet), using pollen and other palynomorphs. *Quaternary International* 218, 45–57. <https://doi.org/10.1016/j.quaint.2009.05.007>
- Heusser, C.J., 1995. Three Late Quaternary pollen diagrams from Southern Patagonia and their palaeoecological implications. *Palaeogeography, Palaeoclimatology, Palaeoecology* 118, 1–24. [https://doi.org/10.1016/0031-0182\(94\)00138-X](https://doi.org/10.1016/0031-0182(94)00138-X)
- Heusser, C.J., 1990a. Ice age vegetation and climate of subtropical Chile. *Palaeogeography, Palaeoclimatology, Palaeoecology* 80, 107–127. [https://doi.org/10.1016/0031-0182\(90\)90124-P](https://doi.org/10.1016/0031-0182(90)90124-P)
- Heusser, C.J., 1990b. Late-glacial and Holocene vegetation and climate of subantarctic South America. *Review of Palaeobotany and Palynology* 65, 9–15. [https://doi.org/10.1016/0034-6667\(90\)90051-J](https://doi.org/10.1016/0034-6667(90)90051-J)
- Heusser, L.E., n.d. Unpublished data.
- Heusser, L.E., 2000. Rapid oscillations in western North America vegetation and climate during Oxygen Isotope Stage 5 inferred from pollen data from Santa Barbara Basin (Hole 893A). *Palaeogeography, Palaeoclimatology, Palaeoecology* 161, 407–421. [https://doi.org/10.1016/S0031-0182\(00\)00096-1](https://doi.org/10.1016/S0031-0182(00)00096-1)
- Heusser, L.E., 1998. Direct correlation of millennial-scale changes in western North American vegetation and climate with changes in the California Current system over the past 60 kyr. *Paleoceanography* 13, 252–262. <https://doi.org/10.1029/98PA00670>
- Heusser, L.E., Shackleton, N.J., 1994. Tropical climatic variation on the Pacific slopes of the Ecuadorian Andes based on a 25,000-year pollen record from deep-sea sediment core Tri 163-31B. *Quaternary Research* 42, 222–225. <https://doi.org/10.1006/qres.1994.1072>
- Higuera, P.E., n.d. Unpublished data.
- Higuera, P.E., 2006. Late Glacial and Holocene Fire History in the Southcentral Brooks Range, Alaska: Direct and Indirect Impacts of Climatic Change on Fire Regimes (PhD thesis). University of Washington, Seattle, Washington.
- Higuera, P.E., Briles, C.E., Whitlock, C., 2014. Fire-regime complacency and sensitivity to centennial-through millennial-scale climate change in Rocky Mountain subalpine forests, Colorado, USA. *Journal of Ecology* 102, 1429–1441. <https://doi.org/10.1111/1365-2745.12296>
- Higuera, P.E., Brubaker, L.B., Anderson, P.M., Hu, F.S., Brown, T.A., 2009. Vegetation mediated the impacts of postglacial climate change on fire regimes in the south-central Brooks Range, Alaska. *Ecological Monographs* 79, 201–219. <https://doi.org/10.1890/07-2019.1>
- Higuera, P.E., Chipman, M.L., Barnes, J.L., Urban, M.A., Hu, F.S., 2011. Variability of tundra fire regimes in Arctic Alaska: millennial-scale patterns and ecological implications. *Ecological Applications* 21, 3211–3226. <https://doi.org/10.1890/11-0387.1>
- Higuera, P.E., Sprugel, D.G., Brubaker, L.B., 2005. Reconstructing fire regimes with charcoal from small-hollow sediments: a calibration with tree-ring records of fire. *The Holocene* 15, 238–251. <https://doi.org/10.1191/0959683605hl789rp>
- Higuera-Gundy, A., Brenner, M., Hodell, D.A., Curtis, J.H., Leyden, B.W., Binford, M.W., 1999. A 10,300 <sup>14</sup>C yr record of climate and vegetation change from Haiti. *Quaternary Research* 52, 159–170. <https://doi.org/10.1006/qres.1999.2062>
- Hillyer, R., Valencia, B.G., Bush, M.B., Silman, M.R., Steinitz-Kannan, M., 2009. A 24,700-yr paleolimnological history from the Peruvian Andes. *Quaternary Research* 71, 71–82. <https://doi.org/10.1016/j.yqres.2008.06.006>
- Hirons, K.R., Edwards, K.J., 1990. Pollen and related studies at Kinloch, Isle of Rhum, Scotland, with particular reference to possible early human impacts on vegetation. *New Phytologist* 116, 715–727. <https://doi.org/10.1111/j.1469-8137.1990.tb00558.x>
- Hirons, K.R., Edwards, K.J., 1986. Events at and around the first and second *Ulmus* declines: palaeoecological investigations in Co. Tyrone, Northern Ireland. *New Phytologist* 104, 131–153. <https://doi.org/10.1111/j.1469-8137.1986.tb00641.x>

- Hooley, A.D., Southern, W., Kershaw, A.P., 1980. Holocene vegetation and environments of Sperm Whale Head, Victoria, Australia. *Journal of Biogeography* 7, 349. <https://doi.org/10.2307/2844655>
- Hope, G.S., n.d. Unpublished data.
- Hope, G.S., 2010. Fire histories from charcoal and palaeoecology in sedge and shrub bogs, in: Balmer, J. (Ed.), *Proceedings of the 2007 Buttongrass Moorland Management Workshop*. Nature Conservation Report 2010/4. Department of Primary Industries, Parks, Water; Environment, Hobart, Tasmania, pp. 36–41.
- Hope, G.S., 2009. Environmental change and fire in the Owen Stanley ranges, Papua New Guinea. *Quaternary Science Reviews* 28, 2261–2276. <https://doi.org/10.1016/j.quascirev.2009.04.012>
- Hope, G.S., 2007a. Palaeoecology and palaeoenvironments of Papua, in: Marshall, A.J., Beehler, B.M. (Eds.), *The Ecology of Papua*. Periplus, Singapore, pp. 255–266.
- Hope, G.S., 2007b. The history of human impact on New Guinea, in: Marshall, A.J., Beehler, B.M. (Eds.), *The Ecology of Papua Part Two*. Periplus, Singapore, pp. 1087–1097.
- Hope, G.S., 2005. Tom Gregory Bog, an infilled meander of the upper Cotter River, Australian Capital Territory. Unpublished report to ECOWISE ACT and Environment ACT.
- Hope, G.S., 2001. Environmental change in the Late Pleistocene and later Holocene at Wanda site, Soroako, South Sulawesi, Indonesia. *Palaeogeography, Palaeoclimatology, Palaeoecology* 171, 129–145. [https://doi.org/10.1016/s0031-0182\(01\)00243-7](https://doi.org/10.1016/s0031-0182(01)00243-7)
- Hope, G.S., 1999. Vegetation and fire response to late Holocene human occupation in island and mainland north west Tasmania. *Quaternary International* 59, 47–60. [https://doi.org/10.1016/S1040-6182\(98\)00071-8](https://doi.org/10.1016/S1040-6182(98)00071-8)
- Hope, G.S., 1998. Early fire and forest change in the Baliem Valley, Irian Jaya, Indonesia. *Journal of Biogeography* 25, 453–461. <https://doi.org/10.1046/j.1365-2699.1998.2530453.x>
- Hope, G.S., 1996a. A reconnaissance survey of potential sites for pollen analysis on Aneityum Island, southern Vanuatu. Unpublished report to the Vanuatu Cultural Centre, Vanuatu.
- Hope, G.S., 1996b. Quaternary change and historical biogeography of the Pacific Islands, in: Keast, A., Miller, S.E. (Eds.), *The Origin and Evolution of Pacific Island Biotas, New Guinea to Eastern Polynesia: Patterns and Processes*. SPB Academic Publishing, Amsterdam, pp. 165–190.
- Hope, G.S., Aplin, K., 2005. Environmental change in the Aru Islands, in: Spriggs, M., O'Connor, S., Veth, P. (Eds.), *The Archaeology of the Aru Islands, Eastern Indonesia*, *Terra Australis* 22. Pandanus Press, Canberra, pp. 25–40.
- Hope, G.S., Clark, R., 2008. A tale of two swamps: sub-alpine peatlands in the Kelly-Scabby area of Namadgi National Park, in: McCue, K., Lenz, S. (Eds.), *Corridors for Survival in a Changing World Proceedings of the NPA ACT Symposium*. National Parks Association of the ACT Inc., Canberra, pp. 61–76.
- Hope, G.S., Coddington, J., O'Dea, D., 2006. Estuarine development and human occupation at Bobundara Swamp, Tilba Tilba, New South Wales, Australia, in: Lillie, M., Ellis, S. (Eds.), *Wetland Archaeology & Environments: Regional Issues, Global Perspectives*. Oxbow Books Limited, pp. 258–274.
- Hope, G.S., Macphail, M., 2005. Rock Arch and Gallaher's Swamps: Core Samples Collected In The Avon/Robertson Catchments 17 March 2005.
- Hope, G.S., Macphail, M., Keaney, B., 2005. Snowy Flat and Ginini Bogs, Brindabella Range, Australian Capital Territory. Unpublished report to Environment ACT and Ecowise Services.
- Hope, G.S., O'Dea, D., Southern, W., 1999. Holocene vegetation histories in the Western Pacific: alternative records of human impact, in: Lilley, I., Galipaud, J.-C. (Eds.), *Colonisation of the Pacific 3000-2000 BP*. ORSTOM, Port Vila, pp. 387–406.
- Hope, G.S., Pask, J., 1998. Tropical vegetational change in the late Pleistocene of New Caledonia. *Palaeogeography, Palaeoclimatology, Palaeoecology* 142, 1–21. [https://doi.org/10.1016/S0031-0182\(97\)00140-5](https://doi.org/10.1016/S0031-0182(97)00140-5)
- Hope, G.S., Stevenson, J., Haberle, S.G., 2006. Palaeoecology of Blundells Flat, Australian Capital Territory. Unpublished report to Ecowise Services and ACT Forests.



- Hope, G.S., Stevenson, J., Southern, W., 2009. Vegetation histories from the Fijian Islands: alternative records of human impact, in: Clark, G., Anderson, A. (Eds.), *The Early Prehistory of Fiji*, Terra Australis 31. ANU ePress, Canberra, Australia, pp. 63–86.  
<https://doi.org/10.22459/TA31.12.2009.04>
- Hope, G.S., Tulip, J., 1994. A long vegetation history from lowland Irian Jaya, Indonesia. *Palaeogeography, Palaeoclimatology, Palaeoecology* 109, 385–398. [https://doi.org/10.1016/0031-0182\(94\)90187-2](https://doi.org/10.1016/0031-0182(94)90187-2)
- Horn, D., 2005. *The Fire History of Broughton Island* (BSc (Hons) thesis). School of Biological, Earth & Environmental Sciences, University of New South Wales, Sydney, Australia.
- Horn, S.P., 1993. Postglacial vegetation and fire history in the Chirripó Páramo of Costa Rica. *Quaternary Research* 40, 107–116. <https://doi.org/10.1006/qres.1993.1061>
- Horn, S.P., 1989. Prehistoric fires in the Chirripó highlands of Costa Rica: Sedimentary charcoal evidence. *Revista de Biología Tropical* 37, 139–148.
- Horn, S.P., Boehm, M.S., Ballard, J.P., 2019. An improved chronology for the microscopic charcoal and pollen records from Anderson Pond, Tennessee, USA. *Palynology* 43, 517–522.  
<https://doi.org/10.1080/01916122.2018.1509150>
- <https://www.ncdc.noaa.gov/paleo-search/study/21050>, n.d.
- <https://www.ncdc.noaa.gov/paleo-search/study/21051>, n.d.
- <https://www.ncdc.noaa.gov/paleo/study/21017>, n.d.
- <https://www.ncdc.noaa.gov/paleo/study/21054>, n.d.
- <https://www.ncdc.noaa.gov/paleo/study/21055>, n.d.
- <https://www.ncdc.noaa.gov/paleo/study/21056>, n.d.
- <https://www.ncdc.noaa.gov/paleo/study/21058>, n.d.
- <https://www.ncdc.noaa.gov/paleo/study/21064>, n.d.
- <https://www.ncdc.noaa.gov/paleo/study/21066>, n.d.
- <https://www.ncdc.noaa.gov/paleo/study/21067>, n.d.
- <https://www.ncdc.noaa.gov/paleo/study/21069>, n.d.
- <https://www.ncdc.noaa.gov/paleo/study/21070>, n.d.
- <https://www.ncdc.noaa.gov/paleo/study/21071>, n.d.
- <https://www.ncdc.noaa.gov/paleo/study/21072>, n.d.
- <https://www.ncdc.noaa.gov/paleo/study/21073>, n.d.
- <https://www.ncdc.noaa.gov/paleo/study/21074>, n.d.
- <http://www.ncdc.noaa.gov/paleo/study/20513>, n.d.
- <http://www.ncdc.noaa.gov/paleo/study/20514>, n.d.
- <http://www.ncdc.noaa.gov/paleo/study/20515>, n.d.
- <http://www.ncdc.noaa.gov/paleo/study/20516>, n.d.
- <http://www.ncdc.noaa.gov/paleo/study/21057>, n.d.
- Hu, F.S., 2015. Lake-sediment charcoal counts and chronological data from Alaskan tundra ecosystems: Erethizon, Fox, Red, and Tempest lakes. <https://doi.org/10.18739/A2G05D>
- Hu, F.S., Chipman, M.L., n.d. Unpublished data.
- Hu, F.S., Chipman, M.L., 2016. Charcoal, geochemical, and isotope records from Alaskan tundra lakes.  
<https://doi.org/10.18739/A2G05D>
- Hu, F.S., Higuera, P.E., Walsh, J.E., Chapman, W.L., Duffy, P.A., Brubaker, L.B., Chipman, M.L., 2010. Tundra burning in Alaska: linkages to climatic change and sea ice retreat. *Journal of Geophysical Research: Biogeosciences* 115. <https://doi.org/10.1029/2009JG001270>
- Hu, Y.N., Xu, Q.H., Zhang, S.R., Mu, H.S., Li, Y., Li, M.Y., 2015. Environmental changes and human impact since 6400 cal. a BP from Jijitan profile in Nihewan Basin. *Quaternary Sciences* 35, 946–959.  
<https://doi.org/10.11928/j.issn.1001-7410.2015.04.16>

- Huang, C.-C., 2002. Holocene landscape development and human impact in the Connemara Uplands, western Ireland. *Journal of Biogeography* 29, 153–165. <https://doi.org/10.1046/j.1365-2699.2002.00661.x>
- Huang, C.-C., Pang, J., Chen, S., Su, H., Han, J., Cao, Y., Zhao, W., Tan, Z., 2006. Charcoal records of fire history in the Holocene loess–soil sequences over the southern Loess Plateau of China. *Palaeogeography, Palaeoclimatology, Palaeoecology* 239, 28–44. <https://doi.org/10.1016/j.palaeo.2006.01.004>
- Huang, C., Kong, Z., Min, L., Pang, Q., Pu, Q., Ji, C., Liu, C., Mao, Y., Yang, A., Yin, Z., 1994. Natural environmental changes since 3ka BP reflected by bottom sediments in Kunming lake of Summer Palace, Beijing. *Marine Geology & Quaternary Geology* 14, 39–46.
- Huang, C.Y., 1996. *Studies on Sediments of the Last 3500 Years in Kunming Lake of Summer Palace*. China Ocean Press 91–160.
- Huang, K., Zheng, Z., Liao, W., Cao, L., Zheng, Y., Zhang, H., Zhu, G., Zhang, Z., Cheddadi, R., 2014. Reconstructing late Holocene vegetation and fire histories in monsoonal region of southeastern China. *Palaeogeography, Palaeoclimatology, Palaeoecology* 393, 102–110. <https://doi.org/10.1016/j.palaeo.2013.11.005>
- Huang, Z., Ma, C., Chyi, S.-J., Tang, L., Zhao, L., 2020a. Charcoal in the Toushe Basin (Fig2A). <https://doi.org/10.1594/PANGAEA.911581>
- Huang, Z., Ma, C., Chyi, S.-J., Tang, L., Zhao, L., 2020b. Data of Paleofire, Vegetation, and Climate Reconstructions of the Middle to Late Holocene From Lacustrine Sediments of the Toushe Basin, Taiwan. <https://doi.org/10.1594/PANGAEA.911595>
- Huang, Z., Ma, C., Chyi, S.-J., Tang, L., Zhao, L., 2020c. Paleofire, vegetation, and climate reconstructions of the middle to late Holocene from lacustrine sediments of the Toushe Basin, Taiwan. *Geophysical Research Letters* 47, e2020GL090401. <https://doi.org/10.1029/2020GL090401>
- Huber, U.M., Markgraf, V., 2003. European impact on fire regimes and vegetation dynamics at the steppe-forest ecotone of southern Patagonia. *The Holocene* 13, 567–579. <https://doi.org/10.1191/0959683603hl647rp>
- Huber, U.M., Markgraf, V., Schäbitz, F., 2004. Geographical and temporal trends in Late Quaternary fire histories of Fuego-Patagonia, South America. *Quaternary Science Reviews* 23, 1079–1097. <https://doi.org/10.1016/j.quascirev.2003.11.002>
- Iglesias, V., Markgraf, V., Whitlock, C., 2016. 17,000 years of vegetation, fire and climate change in the eastern foothills of the Andes (lat. 44°S). *Palaeogeography, Palaeoclimatology, Palaeoecology* 457, 195–208. <https://doi.org/10.1016/j.palaeo.2016.06.008>
- Iglesias, V., Whitlock, C., Bianchi, M.M., Villarosa, G., Outes, V., 2012. Climate and local controls of long-term vegetation dynamics in northern Patagonia (lat. 41°S). *Quaternary Research* 78, 502–512. <https://doi.org/10.1016/j.yqres.2012.07.004>
- Iglesias, V., Whitlock, C., Bianchi, M.M., Villarosa, G., Outes, V., 2011. Holocene climate variability and environmental history at the Patagonian forest/steppe ecotone: Lago Mosquito (42°29′37.89″S, 71°24′14.57″W) and Laguna del Cóndor (42°20′47.22″S, 71°17′07.62″W). *The Holocene* 22, 1297–1307. <https://doi.org/10.1177/0959683611427330>
- Iglesias, V., Whitlock, C., Markgraf, V., Bianchi, M.M., 2014. Postglacial history of the Patagonian forest/steppe ecotone (41–43°S). *Quaternary Science Reviews* 94, 120–135. <https://doi.org/10.1016/j.quascirev.2014.04.014>
- Innes, J.B., Blackford, J.J., Davey, P.J., 2003. Dating the introduction of cereal cultivation to the British Isles: early palaeoecological evidence from the Isle of Man. *Journal of Quaternary Science* 18, 603–613. <https://doi.org/10.1002/jqs.792>
- Inoue, J., Nishimura, R., Takahara, H., 2012. A 7500-year history of intentional fires and changing vegetation on the Soni Plateau, Central Japan, reconstructed from macroscopic charcoal and pollen

- records within mire sediment. *Quaternary International* 254, 12–17.  
<https://doi.org/10.1016/j.quaint.2010.08.012>
- Inoue, J., Okuyama, C., Hayashi, R., Inouchi, Y., 2021. Postglacial anthropogenic fires related to cultural changes in central Japan, inferred from sedimentary charcoal records spanning glacial–interglacial cycles. *Journal of Quaternary Science* 36, 628–637. <https://doi.org/10.1002/jqs.3308>
- Inoue, J., Okuyama, C., Takemura, K., 2018. Long-term fire activity under the East Asian monsoon responding to spring insolation, vegetation type, global climate, and human impact inferred from charcoal records in Lake Biwa sediments in central Japan. *Quaternary Science Reviews* 179, 59–68. <https://doi.org/10.1016/j.quascirev.2017.11.007>
- Inoue, J., Takahara, H., Chijiwa, K., Yoshikawa, S., 2005. Fire history since 17,000 yr BP reconstructed from charcoal particles analysis of the Sonenuma Swamp sediments, Shiga Prefecture, Japan. *Japanese Journal of Historical Botany* 13, 47–54.
- Inoue, J., Takahara, H., Yoshikawa, S., Inouchi, Y., 2001. Reconstruction of fire history during the last 130ka by analysis of microscopic charcoal in Lake Biwa sediment. *The Quaternary Research (Daiyonki-Kenkyu)* 40, 97–104. <https://doi.org/10.4116/jaqua.40.9>
- Inoue, J., Yoshikawa, S., 2005. Research on black plant particles in ando-soils distributed around Lake Biwa, Central Japan, with a new avenue of research on charcoal particles in ando-soils. *The Quaternary Research (Daiyonki-Kenkyu)* 44, 289–296. <https://doi.org/10.4116/jaqua.44.289>
- Itzstein-Davey, F., Atahan, P., Dodson, J., Taylor, D., Zheng, H., 2007. Environmental and cultural changes during the terminal Neolithic: Qingpu, Yangtze delta, eastern China. *The Holocene* 17, 875–887. <https://doi.org/10.1177/0959683607080517>
- Jahns, S., 2005. The later Holocene history of vegetation, land-use and settlements around the Ahlequellmoor in the Solling area, Germany. *Vegetation History and Archaeobotany* 15, 57–63. <https://doi.org/10.1007/s00334-004-0055-6>
- Jahns, S., 2002. An improved time scale for the Holocene history of vegetation and environment on the South Dalmatian Island of Mljet. *Vegetation History and Archaeobotany* 11, 315–316. <https://doi.org/10.1007/s003340200043>
- Jahns, S., 2000. Late-glacial and Holocene woodland dynamics and land-use history of the Lower Oder valley, north-eastern Germany, based on two AMS<sup>14</sup>C-dated pollen profiles. *Vegetation History and Archaeobotany* 9, 111–123. <https://doi.org/10.1007/bf01300061>
- Jahns, S., van den Bogaard, C., 1998. New palynological and tephrostratigraphical investigations of two salt lagoons on the island of Mljet, south Dalmatia, Croatia. *Vegetation History and Archaeobotany* 7, 219–234. <https://doi.org/10.1007/bf01146195>
- Jamrichová, E., n.d. Unpublished data.
- Jamrichová, E., Bobek, P., Šolcová, A., Tkáč, P., Hédl, R., Valachovič, M., 2019. Lowland pine forests in the northwestern Pannonian Basin: between natural vegetation and modern plantations. *Regional Environmental Change* 19, 2395–2409. <https://doi.org/10.1007/s10113-019-01555-y>
- Jamrichová, E., Gálová, A., Gašpar, A., Horsák, M., Frodlová, J., Hájek, M., Hajnalová, M., Hájková, P., 2018. Holocene development of two calcareous spring fens at the Carpathian-Pannonian interface controlled by climate and human impact. *Folia Geobotanica* 53, 243–263. <https://doi.org/10.1007/s12224-018-9324-5>
- Jamrichová, E., Hédl, R., Kolář, J., Tóth, P., Bobek, P., Hajnalová, M., Procházka, J., Kadlec, J., Szabó, P., 2017. Human impact on open temperate woodlands during the middle Holocene in Central Europe. *Review of Palaeobotany and Palynology* 245, 55–68. <https://doi.org/10.1016/j.revpalbo.2017.06.002>
- Jamrichová, E., Potůčková, A., Horsák, M., Hajnalová, M., Barta, P., Tóth, P., Kuneš, P., 2014. Early occurrence of temperate oak-dominated forest in the northern part of the Little Hungarian Plain, SW Slovakia. *The Holocene* 24, 1810–1824. <https://doi.org/10.1177/0959683614551225>

- Jara, I.A., Moreno, P.I., 2014. Climatic and disturbance influences on the temperate rainforests of northwestern Patagonia (40 °S) since ~14,500 cal yr BP. *Quaternary Science Reviews* 90, 217–228. <https://doi.org/10.1016/j.quascirev.2014.01.024>
- Jasinski, J.P.P., Warner, B.G., Andreev, A.A., Aravena, R., Gilbert, S.E., Zeeb, B.A., Smol, J.P., Velichko, A.A., 1998. Holocene environmental history of a peatland in the Lena River valley, Siberia. *Canadian Journal of Earth Sciences* 35, 637–648. <https://doi.org/10.1139/e98-015>
- Jeličić, L., O’Connell, M., 1992. History of vegetation and land use from 3200 B.P. to the present in the north-west Burren, a karstic region of western Ireland. *Vegetation History and Archaeobotany* 1, 119–140. <https://doi.org/10.1007/bf00191553>
- Jenkins, M.A., 1992. A Late Holocene Vegetation Record From an Interdunal Swamp, Mornington Peninsula, Victoria (M.Env.Sci thesis). Department of Geography; Environmental Science, Monash University, Melbourne, Australia.
- Jensen, C., 2004. The vegetation history of a coastal stone-age and iron-age settlement at 70°N, Norway. *Vegetation History and Archaeobotany* 13, 269–284. <https://doi.org/10.1007/s00334-004-0046-7>
- Jensen, K., Lynch, E.A., Calcote, R., Hotchkiss, S.C., 2007. Interpretation of charcoal morphotypes in sediments from Ferry Lake, Wisconsin, USA: do different plant fuel sources produce distinctive charcoal morphotypes? *The Holocene* 17, 907–915. <https://doi.org/10.1177/0959683607082405>
- Jetté, Richard, P.J.H., 1992. Contribution à l’histoire postglaciaire de la végétation en Gaspésie méridionale, Québec. *Géographie physique et Quaternaire* 46, 273–284. <https://doi.org/10.7202/032914ar>
- Ji, M., Shen, J., Zhang, E.L., 2018. Biomass burning patterns around Lake Xingyun during the last 137 years based on a high-resolution analysis of macroscopic charcoal of lake sediment. *Quaternary Sciences* 38, 963–970. <https://doi.org/10.11928/j.issn.1001-7410.2018.04.14>
- Jiang, Q., Ji, J., Shen, J., Matsumoto, R., Tong, G., Qian, P., Ren, X., Yan, D., 2012. Holocene vegetational and climatic variation in westerly-dominated areas of Central Asia inferred from the Sayram Lake in northern Xinjiang, China. *Science China Earth Sciences* 56, 339–353. <https://doi.org/10.1007/s11430-012-4550-9>
- Jiang, W., Leroy, S.A.G., Ogle, N., Chu, G., Wang, L., Liu, J., 2008. Natural and anthropogenic forest fires recorded in the Holocene pollen record from a Jinchuan peat bog, northeastern China. *Palaeogeography, Palaeoclimatology, Palaeoecology* 261, 47–57. <https://doi.org/10.1016/j.palaeo.2008.01.007>
- Jiang, Y.-y., E, C.-y., Hou, G.-l., Sun, Y.-j., Fan, L., Zhao, Y.-j., Yang, L., 2015. Charcoal concentration reflect of environment change and human activities in Qinghai-Lake JXG2 relic. *Journal of Earth Environment* 98–105.
- Jiménez-Moreno, G., García-Alix, A., Hernández-Corbalán, M.D., Anderson, R.S., Delgado-Huertas, A., 2013. Vegetation, fire, climate and human disturbance history in the southwestern Mediterranean area during the late Holocene. *Quaternary Research* 79, 110–122. <https://doi.org/10.1016/j.yqres.2012.11.008>
- Jing, Z., Sumin, W., Jing, L.V., 2003. Climatic and environmental changes from the sediment record of Erhai Lake over the past 10000 years. *Journal of Lake Sciences* 15, 105–111. <https://doi.org/10.18307/2003.0202>
- Jodry, M.A., Shafer, D.S., Stanford, D.J., Davis, O.K., 1989. Late Quaternary environments and human adaptation in the San Luis Valley, south-central Colorado, in: Harmon, E.J. (Ed.), *Water in the Valley, A 1989 Perspective on Water Supplies, Issues, & Solutions in the San Luis Valley, Colorado*, 8th Annual Field Trip. Colorado Ground-Water Association, pp. 189–208.
- Jones, R.L., 1990. Late Holocene vegetational changes on the Illawarra coastal plain, New South Wales, Australia. *Review of Palaeobotany and Palynology* 65, 37–46. [https://doi.org/10.1016/0034-6667\(90\)90054-M](https://doi.org/10.1016/0034-6667(90)90054-M)
- Jones, V.J., Solovieva, N., Self, A.E., McGowan, S., Rosén, P., Salonen, J.S., Seppä, H., Väiliranta, M., Parrott, E., Brooks, S.J., 2011. The influence of Holocene tree-line advance and retreat on an Arctic lake



- ecosystem: a multi-proxy study from Kharinei Lake, North Eastern European Russia. *Journal of Paleolimnology* 46, 123–137. <https://doi.org/10.1007/s10933-011-9528-7>
- Jouffroy-Bapicot, I., 2010. *Évolution de la Végétation du Massif du Morvan (Bourgogne-France) depuis la Dernière Glaciation à partir de L'analyse Pollinique. Variations Climatiques et Impact des Activités Anthropiques* (PhD thesis). Université de Franche-Comté, Besançon, France.
- Jouffroy-Bapicot, I., Vannièrè, B., Gauthier, Richard, H., Monna, F., Petit, C., 2013. 7000 years of vegetation history and land-use changes in the Morvan Mountains (France): a regional synthesis. *The Holocene* 23, 1888–1902. <https://doi.org/10.1177/0959683613508161>
- Jouffroy-Bapicot, I., Vannièrè, B., Iglesias, V., Debret, M., Delarras, J.-F., 2016. 2000 years of grazing history and the making of the Cretan mountain landscape, Greece. *PLOS ONE* 11, e0156875. <https://doi.org/10.1371/journal.pone.0156875>
- Juutinen, S., Väiliranta, M., Kuutti, V., Laine, A.M., Virtanen, T., Seppä, H., Weckström, J., Tuittila, E.-S., 2013. Short-term and long-term carbon dynamics in a northern peatland-stream-lake continuum: a catchment approach. *Journal of Geophysical Research: Biogeosciences* 118, 171–183. <https://doi.org/10.1002/jgrg.20028>
- Juvigné, E.H., 1986. Late-Quaternary sediments at Battle Ground Lake, Southern Puget Trough, Washington. *Northwest Science* 60, 210–217.
- Kaakinen, A., Salonen, V.-P., Artimo, A., Saraperä, S., 2010. Holocene groundwater table fluctuations in a small perched aquifer inferred from sediment record of Kankaanjärvi, SW Finland. *Boreal Environment Research* 58–68.
- Kaal, J., Carrión Marco, Y., Asouti, E., Martín Seijo, M., Martínez Cortizas, A., Costa-Casáis, M., Criado-Boado, F., 2011. Long-term deforestation in NW Spain: linking the Holocene fire history to vegetation change and human activities. *Quaternary Science Reviews* 30, 161–175. <https://doi.org/10.1016/j.quascirev.2010.10.006>
- Kaal, J., Costa-Casais, M., Ferro-Vázquez, C., Pontevedra-Pombal, X., Martínez Cortizas, A., 2008. Soil formation of “Atlantic Rankers” from NW Spain — A high resolution aluminium and iron fractionation study. *Pedosphere* 18, 441–453. [https://doi.org/10.1016/s1002-0160\(08\)60035-1](https://doi.org/10.1016/s1002-0160(08)60035-1)
- Kaal, J., Criado-Boado, F., Costa-Casais, M., López-Sáez, J.A., López-Merino, L., Mighall, T., Carrión, Y., Silva Sánchez, N., Martínez Cortizas, A., 2013. Prehistoric land use at an archaeological hot-spot (the rock art park of Campo Lameiro, NW Spain) inferred from charcoal, synanthropic pollen and non-pollen palynomorph proxies. *Journal of Archaeological Science* 40, 1518–1527. <https://doi.org/10.1016/j.jas.2012.09.024>
- Kajukalo, K., Fiałkiewicz-Kozieł, B., Gałka, M., Kołaczek, P., Lamentowicz, M., 2016. Abrupt ecological changes in the last 800 years inferred from a mountainous bog using testate amoebae traits and multi-proxy data. *European Journal of Protistology* 55, 165–180. <https://doi.org/10.1016/j.ejop.2016.04.003>
- Kaltenrieder, P., Belis, C.A., Hofstetter, S., Ammann, B., Ravazzi, C., Tinner, W., 2009. Environmental and climatic conditions at a potential glacial refugial site of tree species near the Southern Alpine glaciers. New insights from multiproxy sedimentary studies at Lago della Costa (Euganean Hills, Northeastern Italy). *Quaternary Science Reviews* 28, 2647–2662. <https://doi.org/10.1016/j.quascirev.2009.05.025>
- Kaltenrieder, P., Procacci, G., Vannièrè, B., Tinner, W., 2010. Vegetation and fire history of the Euganean Hills (Colli Euganei) as recorded by Lateglacial and Holocene sedimentary series from Lago della Costa (northeastern Italy). *The Holocene* 20, 679–695. <https://doi.org/10.1177/0959683609358911>
- Kaltenrieder, P., Tinner, W., Ammann, B., Ravazzi, C., 2004. Did temperate European trees survive the full glacial (LGM) near the Alps? First palynological evidences from Colli Euganei near Padova, Northern Italy, in: *Proceedings of the 2nd Swiss Geoscience Meeting*. Lausanne, Switzerland.

- Kalugin, I., Selegei, V., Goldberg, E., Seret, G., 2005. Rhythmic fine-grained sediment deposition in Lake Teletskoye, Altai, Siberia, in relation to regional climate change. *Quaternary International* 136, 5–13. <https://doi.org/10.1016/j.quaint.2004.11.003>
- Kangur, M., 2009. Spatio-temporal distribution of pollen in Lake Väike-Juusa (South Estonia) sediments. *Review of Palaeobotany and Palynology* 153, 354–359. <https://doi.org/10.1016/j.revpalbo.2008.10.003>
- Kaniewski, D., Paulissen, E., de Laet, V., Waelkens, M., 2008. Late Holocene fire impact and post-fire regeneration from the Bereket Basin, Taurus Mountains, southwest Turkey. *Quaternary Research* 70, 228–239. <https://doi.org/10.1016/j.yqres.2008.04.002>
- Karpińska-Kończak, M., Kończak, P., Stachowicz-Rybka, R., 2014. Pathways of woodland succession under low human impact during the last 13,000 years in northeastern Poland. *Quaternary International* 328–329, 196–212. <https://doi.org/10.1016/j.quaint.2013.11.038>
- Karpińska-Kończak, M., Stachowicz-Rybka, R., Obidowicz, A., Woszczyk, M., Kończak, P., 2016. A lake-bog succession vs. climate changes from 13,300 to 5900 cal. BP in NE Poland in the light of palaeobotanical and geochemical proxies. *Review of Palaeobotany and Palynology* 233, 199–215. <https://doi.org/10.1016/j.revpalbo.2016.06.001>
- Katamura, F., Fukuda, M., Bosikov, N.P., Desyatkin, R.V., 2009. Charcoal records from thermokarst deposits in central Yakutia, eastern Siberia: implications for forest fire history and thermokarst development. *Quaternary Research* 71, 36–40. <https://doi.org/10.1016/j.yqres.2008.08.003>
- Katamura, F., Fukuda, M., Bosikov, N.P., Desyatkin, R.V., 2009. Forest fires and vegetation during the Holocene in central Yakutia, eastern Siberia. *Journal of Forest Research* 14, 30–36. <https://doi.org/10.1007/s10310-008-0099-z>
- Katamura, F., Fukuda, M., Bosikov, N.P., Desyatkin, R.V., Nakamura, T., Moriizumi, J., 2006. Thermokarst formation and vegetation dynamics inferred from a palynological study in central Yakutia, Eastern Siberia, Russia. *Arctic, Antarctic, and Alpine Research* 38, 561–570. [https://doi.org/10.1657/1523-0430\(2006\)38\[561:tfavdj\]2.0.co;2](https://doi.org/10.1657/1523-0430(2006)38[561:tfavdj]2.0.co;2)
- Kdster, D., Pienitz, R., 2006a. Late-Holocene environmental history of two New England ponds: natural dynamics versus human impacts. *The Holocene* 16, 519–532. <https://doi.org/10.1191/0959683606hl947rp>
- Kdster, D., Pienitz, R., 2006b. Seasonal diatom variability and paleolimnological inferences – a case study. *Journal of Paleolimnology* 35, 395–416. <https://doi.org/10.1007/s10933-005-1334-7>
- Keaney, B., Hope, G.S., 2003. The Holocene vegetation history of Yaouk Swamp, New South Wales. Unpublished manuscript.
- Kearney, M.S., Luckman, B.H., 1987. A mid-Holocene vegetational and climatic record from the subalpine zone of the Maligne Valley, Jasper National Park, Alberta (Canada). *Palaeogeography, Palaeoclimatology, Palaeoecology* 59, 227–242. [https://doi.org/10.1016/0031-0182\(87\)90082-4](https://doi.org/10.1016/0031-0182(87)90082-4)
- Kearney, M.S., Luckman, B.H., 1983a. Holocene timberline fluctuations in Jasper National Park, Alberta. *Science* 221, 261–263. <https://doi.org/10.1126/science.221.4607.261>
- Kearney, M.S., Luckman, B.H., 1983b. Postglacial vegetational history of Tonquin Pass, British Columbia. *Canadian Journal of Earth Sciences* 20, 776–786. <https://doi.org/10.1139/e83-069>
- Keizer, P.S., Gajewski, K., McLeman, R., 2015. Forest dynamics in relation to multi-decadal late-Holocene climatic variability, eastern Ontario, Canada. *Review of Palaeobotany and Palynology* 219, 106–115. <https://doi.org/10.1016/j.revpalbo.2015.04.001>
- Kelly, R., Chipman, M.L., Higuera, P.E., Stefanova, I., Brubaker, L.B., Hu, F.S., 2013. Recent burning of boreal forests exceeds fire regime limits of the past 10,000 years. *Proceedings of the National Academy of Sciences* 110, 13055–13060. <https://doi.org/10.1073/pnas.1305069110>
- Kemp, J., 1993. The end of the Pleistocene in the Southern Tablelands, Southeastern Australia (BSc thesis). Department of Geography, The Australian National University, Canberra, Australia.

- Kemp, J., Hope, G.S., 2014. Vegetation and environments since the Last Glacial Maximum in the Southern Tablelands, New South Wales. *Journal of Quaternary Science* 29, 778–788. <https://doi.org/10.1002/jqs.2749>
- Kennedy, L.M., Horn, S.P., 2007. A late Holocene pollen and charcoal record from La Selva Biological Station, Costa Rica. *Biotropica* 40, 11–19. <https://doi.org/10.1111/j.1744-7429.2007.00334.x>
- Kennedy, L.M., Horn, S.P., Orvis, K.H., 2006. A 4000-year record of fire and forest history from Valle de Bao, Cordillera Central, Dominican Republic. *Palaeogeography, Palaeoclimatology, Palaeoecology* 231, 279–290. <https://doi.org/10.1016/j.palaeo.2005.08.002>
- Kenyon, C.E., 1989. A Late Pleistocene and Holocene Palaeoecological Record from Boulder Flat, East Gippsland (BSc (Hons) thesis). Department of Botany; Zoology, Monash University, Melbourne, Australia.
- Kershaw, A.P., 1983. A Holocene pollen diagram from Lynch’s Crater, north-eastern Queensland, Australia. *New Phytologist* 94, 669–682. <https://doi.org/10.1111/j.1469-8137.1983.tb04875.x>
- Kershaw, A.P., Bretherton, S.C., van der Kaars, S., 2007. A complete pollen record of the last 230 ka from Lynch’s Crater, north-eastern Australia. *Palaeogeography, Palaeoclimatology, Palaeoecology* 251, 23–45. <https://doi.org/10.1016/j.palaeo.2007.02.015>
- Kershaw, A.P., McKenzie, G.M., Porch, N., Roberts, R.G., Brown, J., Heijnis, H., Orr, M.L., Jacobsen, G., Newall, P.R., 2007. A high-resolution record of vegetation and climate through the last glacial cycle from Caledonia Fen, southeastern highlands of Australia. *Journal of Quaternary Science* 22, 481–500. <https://doi.org/10.1002/jqs.1127>
- Kitagawa, H., Stein, M., Goldstein, S.L., Nakamura, T., Lazar, B., 2017. Radiocarbon chronology of the DSDDP core at the deepest floor of the Dead Sea. *Radiocarbon* 59, 383–394. <https://doi.org/10.1017/RDC.2016.120>
- Kodala, P.G., 1996. The Vegetation of the Robertson Plateau, New South Wales: Historical and Contemporary Issues (PhD thesis). University of New South Wales, Sydney, Australia.
- Kodala, P.G., Dodson, J.R., 1988. Late Holocene vegetation and fire record from Ku-ring-gai Chase National Park, New South Wales, in: *Proceedings of the Linnean Society of New South Wales*. pp. 317–326.
- Kozáková, R., Bobek, P., Dreslerová, D., Abraham, V., Svobodová-Svitavská, H., 2021. The prehistory and early history of the Šumava Mountains (Czech Republic) as seen through anthropogenic pollen indicators and charcoal data. *The Holocene* 31, 145–159. <https://doi.org/10.1177/0959683620961484>
- Kořaczek, P., Gałka, M., Apolinarska, K., Płóciennik, M., Gąsiorowski, M., Brooks, S.J., Hutchinson, S.M., Karpińska-Kořaczek, M., 2018. A multi-proxy view of exceptionally early postglacial development of riparian woodlands with *Ulmus* in the Dniester River valley, western Ukraine. *Review of Palaeobotany and Palynology* 250, 27–43. <https://doi.org/10.1016/j.revpalbo.2017.12.001>
- Kořaczek, P., Karpińska-Kořaczek, M., Madeja, J., Kalinowych, N., Szczepanek, K., Gębica, P., Harmata, K., 2016. Interplay of climate–human–vegetation on the north-eastern edge of the Carpathians (Western Ukraine) between 7500 and 3500 calibrated years BP. *Biological Journal of the Linnean Society* 119, 609–629. <https://doi.org/10.1111/bij.12732>
- Kořaczek, P., Margielewski, W., Gałka, M., Apolinarska, K., Płóciennik, M., Gąsiorowski, M., Buczek, K., Karpińska-Kořaczek, M., 2017. Five centuries of the Early Holocene forest development and its interactions with palaeoecosystem of small landslide lake in the Beskid Makowski Mountains (Western Carpathians, Poland)—high resolution multi-proxy study. *Review of Palaeobotany and Palynology* 244, 113–127. <https://doi.org/10.1016/j.revpalbo.2017.05.002>
- Kořaczek, P., Margielewski, W., Gałka, M., Karpińska-Kořaczek, M., Buczek, K., Lamentowicz, M., Borek, A., Zernitskaya, V., Marcisz, K., 2020. Towards the understanding the impact of fire on the lower montane forest in the Polish Western Carpathians during the Holocene. *Quaternary Science Reviews* 229, 106137. <https://doi.org/10.1016/j.quascirev.2019.106137>

- Kořaczek, P., Płóciennik, M., Gařka, M., Apolinarska, K., Tosik, K., Gařiorowski, M., Brooks, S.J., Karpińska-Kořaczek, M., 2018. Persist or take advantage of global warming: a development of Early Holocene riparian forest and oxbow lake ecosystems in Central Europe. *Quaternary Science Reviews* 200, 191–211. <https://doi.org/10.1016/j.quascirev.2018.09.031>
- Königsson, L.K., Saarse, L., Veski, S., 1998. Holocene history of vegetation and landscape on the Kõpu Peninsula, Hiiumaa Island, Estonia. *Proceedings of the Estonian Academy of Sciences, Geology* 47, 3–19.
- Kramer, A., Herzsuh, U., Mischke, S., Zhang, C., 2010. Holocene treeline shifts and monsoon variability in the Hengduan Mountains (southeastern Tibetan Plateau), implications from palynological investigations. *Palaeogeography, Palaeoclimatology, Palaeoecology* 286, 23–41. <https://doi.org/10.1016/j.palaeo.2009.12.001>
- Krivanogov, S.K., Takahara, H., Kuzmin, Y.V., Orlova, L.A., Jull, A.J.T., Nakamura, T., Miyoshi, N., Kawamuro, K., Bezrukova, E.V., 2004. Radiocarbon chronology of the Late Pleistocene–Holocene paleogeographic events in Lake Baikal region (Siberia). *Radiocarbon* 46, 745–754. <https://doi.org/10.1017/s0033822200035785>
- Kultti, S., Oksanen, P., Väiliranta, M., 2004. Holocene tree line, permafrost, and climate dynamics in the Nenets Region, East European Arctic. *Canadian Journal of Earth Sciences* 41, 1141–1158. <https://doi.org/10.1139/e04-058>
- Kuneř, P., Pokorný, P., Jankovská, V., 2007. Post-glacial vegetation development in sandstone areas of the Czech Republic, in: Härtel, H., Cílek, V., Herben, T., Jackson, A., Williams, R. (Eds.), *Sandstone Landscapes*. Academia, Praha, Czech Republic, pp. 244–257.
- Kuosmanen, N., Fang, K., Bradshaw, R.H.W., Clear, J.L., Seppä, H., 2014. Role of forest fires in Holocene stand-scale dynamics in the unmanaged taiga forest of northwestern Russia. *The Holocene* 24, 1503–1514. <https://doi.org/10.1177/0959683614544065>
- Kuosmanen, N., Seppä, H., Alenius, T., Bradshaw, R.H.W., Clear, J. I., Filimonova, L., Heikkilä, M., Renssen, H., Tallavaara, M., Reitalu, T., 2016. Importance of climate, forest fires and human population size in the Holocene boreal forest composition change in northern Europe. *Boreas* 45, 688–702. <https://doi.org/10.1111/bor.12183>
- Kuosmanen, N., Seppä, H., Reitalu, T., Alenius, T., Bradshaw, R.H.W., Clear, J.L., Filimonova, L., Kuznetsov, O., Zaretskaya, N., 2015. Long-term forest composition and its drivers in taiga forest in NW Russia. *Vegetation History and Archaeobotany* 25, 221–236. <https://doi.org/10.1007/s00334-015-0542-y>
- Kupriyanov, D.A., Novenko, E.Y., 2019. Reconstruction of the Holocene dynamics of forest fires in the central part of Meshcherskaya lowlands according to antracological analysis. *Contemporary Problems of Ecology* 12, 204–212. <https://doi.org/10.1134/S1995425519030065>
- Labelle, C., Richard, P.J.H., 1984. Histoire postglaciaire de la végétation dans la région de Mont-Saint-Pierre, Gaspésie, Québec. *Géographie physique et Quaternaire* 38, 257–274. <https://doi.org/10.7202/032567ar>
- Ladd, P.G., 1978. Vegetation history at Lake Curlip in lowland eastern Victoria, from 5200 B.P. to present. *Australian Journal of Botany* 26, 393–414. <https://doi.org/10.1071/bt9780393>
- Ladd, P.G., Orchiston, D.W., Joyce, E.B., 1992. Holocene vegetation history of Flinders Island. *New Phytologist* 122, 757–767. <https://doi.org/10.1111/j.1469-8137.1992.tb00104.x>
- Lafontaine-Boyer, K., Gajewski, K., 2014. Vegetation dynamics in relation to late Holocene climate variability and disturbance, Outaouais, Québec, Canada. *The Holocene* 24, 1515–1526. <https://doi.org/10.1177/0959683614544054>
- Lamentowicz, M., Kořaczek, P., Mauquoy, D., Kittel, P., Lokas, E., Słowiński, M., Jassey, V.E.J., Niedziółka, K., Kajukařo-Drygalska, K., Marcisz, K., 2019. Always on the tipping point—a search for signals of past societies and related peatland ecosystem critical transitions during the last 6500 years in N Poland. *Quaternary Science Reviews* 225, 105954. <https://doi.org/10.1016/j.quascirev.2019.105954>



- Lamentowicz, M., Słowiński, M., Marcisz, K., Zielińska, M., Kaliszan, K., Lapshina, E., Gilbert, D., Buttler, A., Fiałkiewicz-Kozieł, B., Jasse, V.E.J., Laggoun-Defarge, F., Kotaczek, P., 2015. Hydrological dynamics and fire history of the last 1300 years in western Siberia reconstructed from a high-resolution, ombrotrophic peat archive. *Quaternary Research* 84, 312–325.  
<https://doi.org/10.1016/j.yqres.2015.09.002>
- Lane, C.S., Andrič, M., Cullen, V.L., Blockley, S.P.E., 2011. The occurrence of distal Icelandic and Italian tephra in the Lateglacial of Lake Bled, Slovenia. *Quaternary Science Reviews* 30, 1013–1018.  
<https://doi.org/10.1016/j.quascirev.2011.02.014>
- Lane, C.S., Horn, S.P., Mora, C.I., Orvis, K.H., 2009. Late-Holocene paleoenvironmental change at mid-elevation on the Caribbean slope of the Cordillera Central, Dominican Republic: a multi-site, multi-proxy analysis. *Quaternary Science Reviews* 28, 2239–2260.  
<https://doi.org/10.1016/j.quascirev.2009.04.013>
- Larmon, J.T., 2013. The Pacific Coast of Guatemala: a Palynological Investigation of Climate Change and Human Occupation (MSc thesis). Washington State University, Pullman, Washington, USA.
- Larsen, C.P.S., 1994. Spatial and Temporal Variations in Fire Frequency in the Boreal Forest of Northern Alberta (PhD thesis). Department of Geography, McMaster University, Hamilton, Ontario, Canada.
- Larsen, C.P.S., MacDonald, G.M., 1998. Fire and vegetation dynamics in a jack pine and black spruce forest reconstructed using fossil pollen and charcoal. *Journal of Ecology* 86, 815–828.  
<https://doi.org/10.1046/j.1365-2745.1998.8650815.x>
- Larsen, C.P.S., Morris, W.A., MacDonald, G.M., 2000. Records of geomagnetic secular variation since 1200 AD and the potential for chronological control of lake sediments in northern Alberta. *Canadian Journal of Earth Sciences* 37, 1711–1722. <https://doi.org/10.1139/e00-052>
- Latałowa, M., Pędziszewska, A., Maciejewska, E., Święta-Musznicka, J., 2013. Tilia forest dynamics, Kretzschmaria deusta attack, and mire hydrology as palaeoecological proxies for mid-Holocene climate reconstruction in the Kashubian Lake District (N Poland). *The Holocene* 23, 667–677.  
<https://doi.org/10.1177/0959683612467484>
- Latham, M., Hughes, P.J., Hope, G.S., Brookfield, H.C., 1983. Sedimentation in the swamps of Lakeba and its implications for erosion and human occupation of the island, in: Latham, M., Brookfield, H.C. (Eds.), *The Eastern Islands of Fiji, a Study of the Natural Environment, Its Use, and Man's Influence on Its Evolution*. ORSTOM, Paris, pp. 103–120.
- Laul, S., Kihno, K., 1999. Prehistoric land use and settlement history on the Haanja Heights, southeastern Estonia, with special reference to the Siksali-Hino area, in: Miller, U., Hackens, T., Lang, V., Raukas, A., Hicks, S. (Eds.), *Environmental and Cultural History of the Eastern Baltic Region*. PACT (Rixensart), pp. 239–254.
- Laumets, L., Kalm, V., Poska, A., Kele, S., Lasberg, K., Amon, L., 2013. Palaeoclimate inferred from  $\delta^{18}\text{O}$  and palaeobotanical indicators in freshwater tufa of Lake Äntu Sinijärv, Estonia. *Journal of Paleolimnology* 51, 99–111. <https://doi.org/10.1007/s10933-013-9758-y>
- Lazarova, M., Marinova, E., Tonkov, S., Snowball, I., 2015. A 5000-year pollen and plant macrofossil record from the Osogovo Mountain, Southwestern Bulgaria: Vegetation history and human impact. *Review of Palaeobotany and Palynology* 223, 1–9. <https://doi.org/10.1016/j.revpalbo.2015.08.005>
- Leahy, P.J., Tibby, J., Kershaw, A.P., Heijnis, H., Kershaw, J.S., 2005. The impact of European settlement on Bolin Billabong, a Yarra River floodplain lake, Melbourne, Australia. *River Research and Applications* 21, 131–149. <https://doi.org/10.1002/rra.837>
- Ledru, M.-P., Ceccantini, G., Marques Gouveia, S.E., López-Sáez, J.A., Ruiz Pessenda, L.C., de Souza Ribeiro, A., 2006. Millennial-scale climatic and vegetation changes in a northern Cerrado (Northeast, Brazil) since the Last Glacial Maximum. *Quaternary Science Reviews* 25, 1110–1126.  
<https://doi.org/10.1016/j.quascirev.2005.10.005>

- Ledru, M.-P., Cordeiro, R.C., Dominguez, J.M.L., Martin, L., Mourguiart, P., Sifeddine, A., Turcq, B., 2001. Late-Glacial cooling in Amazonia inferred from pollen at Lagoa do Caçó, Northern Brazil. *Quaternary Research* 55, 47–56. <https://doi.org/10.1006/qres.2000.2187>
- Ledru, M.-P., Mourguiart, P., Ceccantini, G., Turcq, B., Sifeddine, A., 2002. Tropical climates in the game of two hemispheres revealed by abrupt climatic change. *Geology* 30, 275–278. [https://doi.org/10.1130/0091-7613\(2002\)030<0275:TCITGO>2.0.CO;2](https://doi.org/10.1130/0091-7613(2002)030<0275:TCITGO>2.0.CO;2)
- Leunda, M., González-Sampériz, P., Gil-Romera, G., Aranbarri, J., Moreno, A., Oliva-Urcia, B., Sevilla-Callejo, M., Valero-Garcés, B., 2017. The Late-Glacial and Holocene Marboré Lake sequence (2612 m a.s.l., Central Pyrenees, Spain): Testing high altitude sites sensitivity to millennial scale vegetation and climate variability. *Global and Planetary Change* 157, 214–231. <https://doi.org/10.1016/j.gloplacha.2017.08.008>
- Li, B., 2014. Environmental Evolution of Eastern Taihu Plain During the Holocene Achived by Pingwang Core (PhD thesis). Nangjing University, Nanjing, China.
- Li, J., Mackay, A.W., Zhang, Y., Li, J., 2013. A 1000-year record of vegetation change and wildfire from maar lake Erlongwan in northeast China. *Quaternary International* 290-291, 313–321. <https://doi.org/10.1016/j.quaint.2012.08.2104>
- Li, J., Wang, N., 2020. Holocene grassland fire dynamics and forcing factors in continental interior of China. *Geophysical Research Letters* 47, 1–9. <https://doi.org/10.1029/2020GL088049>
- Li, X.Q., Shang, X., Dodson, J., Zhou, X.Y., 2009. Holocene agriculture in the Guanzhong Basin in NW China indicated by pollen and charcoal evidence. *The Holocene* 19, 1213–1220. <https://doi.org/10.1177/0959683609345083>
- Li, X.Q., Zhao, H.L., Yan, M.H., Wang, S.Z., 2005. Fire variations and relationship on fire and vegetation and climate during Holocene at Sanjiang Plain, northeast China. *Scientia Geographica Sinica* 25, 177–182.
- Li, Y.H., Yin, H.N., Zhang, X.Y., Chen, Z.J., 2003. The environment disaster events and the evolution of man-land relation in the west Liaoning during 5000 aBP. *Journal of Glaciology and Geocryology* 25, 19–26.
- Li, Y., Zhang, Y., Wang, J., Wang, L., Li, Y., Chen, L., Zhao, L., Kong, Z., 2019. Preliminary study on pollen, charcoal records and environmental evolution of Alahake Saline Lake in Xinjiang since 4,700 cal yr BP. *Quaternary International* 513, 8–17. <https://doi.org/10.1016/j.quaint.2019.01.014>
- Li, Z.X., Wu, G.X., Sun, Y.L., Zhang, M., Gu, L., 2017. Environmental and anthropogenic records of Late Longshan period at the Wadian Site. *Marine Geology and Quaternary Geology* 37, 180–186.
- Liao, J., 2017. Vegetational and Environmental Changes During Last Glacial Maximum (LGM) in Lugu Lake (PhD thesis). Yunnan Normal University, Kunming, China.
- Lindbladh, M., Bradshaw, R., Holmqvist, B.H., 2000. Pattern and process in south Swedish forests during the last 3000 years, sensed at stand and regional scales. *Journal of Ecology* 88, 113–128. <https://doi.org/10.1046/j.1365-2745.2000.00429.x>
- Lindbladh, M., Oswald, W.W., Foster, D.R., Faison, E.K., Hou, J., Huang, Y., 2007. A late-glacial transition from *Picea glauca* to *Picea mariana* in southern New England. *Quaternary Research* 67, 502–508. <https://doi.org/10.1016/j.yqres.2007.01.010>
- Ling, G.J., Jia, Y.L., Ma, C.M., 2016. Mid-late Holocene (3580~1630 cal. a BP) climate and environment records from Huangqi Lake in Inner Mongolia. *Quaternary Sciences* 36, 257–267. <https://doi.org/10.11928/j.issn.1001-7410.2016.02.02>
- Lisitsyna, n.d. Unpublished data.
- Liu, Y., 2014. Environmental Change of Hangzhou Bay Coast since the Mid Holocene – A Highlight to the Formation of Liangzhu City Complex (PhD thesis). East China Normal University, Shanghai, China.
- Liu, Y.L., 2012. Holocene Climate Change and Flood Events Documented by Sedimentary Record in Sanyangzhuang Site (PhD thesis). Hebei Normal University, Shijiazhuang, China.

- Long, C.J., Power, M.J., Bartlein, P.J., 2011. The effects of fire and tephra deposition on forest vegetation in the Central Cascades, Oregon. *Quaternary Research* 75, 151–158. <https://doi.org/10.1016/j.yqres.2010.08.010>
- Long, C.J., Power, M.J., McDonald, B., 2011. Millennial-scale fire and vegetation history from a mesic hardwood forest of southeastern Wisconsin, USA. *Journal of Quaternary Science* 26, 318–325. <https://doi.org/10.1002/jqs.1456>
- Long, C.J., Whitlock, C., 2002. Fire and vegetation history from the coastal rain forest of the western Oregon Coast Range. *Quaternary Research* 58, 215–225. <https://doi.org/10.1006/qres.2002.2378>
- Long, C.J., Whitlock, C., Bartlein, P.J., 2007. Holocene vegetation and fire history of the Coast Range, western Oregon, USA. *The Holocene* 17, 917–926. <https://doi.org/10.1177/0959683607082408>
- Longmore, M.E., 1997. Quaternary palynological records from perched lake sediments, Fraser Island, Queensland, Australia: rainforest, forest history and climatic control. *Australian Journal of Botany* 45, 507–526. <https://doi.org/10.1071/bt96109>
- Longmore, M.E., Heijnis, H., 1999. Aridity in Australia: Pleistocene records of palaeohydrological and palaeoecological change from the perched lake sediments of Fraser Island, Queensland, Australia. *Quaternary International* 57-58, 35–47. [https://doi.org/10.1016/s1040-6182\(98\)00048-2](https://doi.org/10.1016/s1040-6182(98)00048-2)
- Lotter, A.F., 1999. Late-glacial and Holocene vegetation history and dynamics as shown by pollen and plant macrofossil analyses in annually laminated sediments from Soppensee, central Switzerland. *Vegetation History and Archaeobotany* 8, 165–184. <https://doi.org/10.1007/BF02342718>
- Loughlin, N.J.D., Gosling, W.D., Coe, A.L., Gulliver, P., Mothes, P., Montoya, E., 2018. Landscape-scale drivers of glacial ecosystem change in the montane forests of the eastern Andean flank, Ecuador. *Palaeogeography, Palaeoclimatology, Palaeoecology* 489, 198–208. <https://doi.org/10.1016/j.palaeo.2017.10.011>
- Loughlin, N.J.D., Gosling, W.D., Mothes, P., Montoya, E., 2018. Ecological consequences of post-Columbian indigenous depopulation in the Andean–Amazonian corridor. *Nature Ecology & Evolution* 2, 1233–1236. <https://doi.org/10.1038/s41559-018-0602-7>
- Lozano-García, M. d.S., Caballero, M., Ortega, B., Rodríguez, A., Sosa-Nájera, S., 2007. Tracing the effects of the Little Ice Age in the tropical lowlands of eastern Mesoamerica. *Proceedings of the National Academy of Sciences* 104, 16200–16203. <https://doi.org/10.1073/pnas.0707896104>
- Lozano-García, M. d.S., Sosa-Nájera, S., Sugiura, Y., Caballero, M., 2005. 23,000 yr of vegetation history of the Upper Lerma, a tropical high-altitude basin in Central Mexico. *Quaternary Research* 64, 70–82. <https://doi.org/10.1016/j.yqres.2005.02.010>
- López-Merino, L., Silva Sánchez, N., Kaal, J., López-Sáez, J.A., Martínez Cortizas, A., 2012. Post-disturbance vegetation dynamics during the Late Pleistocene and the Holocene: an example from NW Iberia. *Global and Planetary Change* 92-93, 58–70. <https://doi.org/10.1016/j.gloplacha.2012.04.003>
- López-Sáez, J.A., Abel-Schaad, D., Robles-López, S., Pérez-Díaz, S., Alba-Sánchez, F., Nieto-Lugilde, D., 2016. Landscape dynamics and human impact on high-mountain woodlands in the western Spanish Central System during the last three millennia. *Journal of Archaeological Science: Reports* 9, 203–218. <https://doi.org/10.1016/j.jasrep.2016.07.027>
- López-Sáez, J.A., Alba-Sánchez, F., Robles-López, S., Pérez-Díaz, S., Abel-Schaad, D., Sabariego-Ruiz, S., Glais, A., 2016. Exploring seven hundred years of transhumance, climate dynamic, fire and human activity through a historical mountain pass in central Spain. *Journal of Mountain Science* 13, 1139–1153. <https://doi.org/10.1007/s11629-016-3885-7>
- López-Sáez, J.A., Carrasco, R.M., Turu, V., Ruiz-Zapata, B., Gil-García, M.J., Luelmo-Lautenschlaeger, R., Pérez-Díaz, S., Alba-Sánchez, F., Abel-Schaad, D., Ros, X., Pedraza, J., 2020. Late Glacial-early holocene vegetation and environmental changes in the western Iberian Central System inferred from a key site: The Navamuño record, Béjar range (Spain). *Quaternary Science Reviews* 230, 106167. <https://doi.org/10.1016/j.quascirev.2020.106167>

- López-Sáez, J.A., Figueiral, I., Cruz, D., 2017. Palaeoenvironment and vegetation dynamics in Serra da Nave (Alto Paiva, Beira Alta, Portugal) during the Late Pleistocene and the Holocene, in: Cruz, D.J. (Ed.), *Actas da Mesa-Redonda À Pre-história e a Proto-história no Centro de Portugal: Avaliação e Perspectivas de Futuro*, Edition 1. Centro de Estudos Pré-históricos.
- López-Sáez, J.A., Pérez-Díaz, S., Rodríguez-Ramírez, A., Blanco-González, A., Villarías-Robles, J.J.R., Luelmo-Lautenschlaeger, R., Jiménez-Moreno, G., Celestino-Pérez, S., Cerrillo-Cuenca, E., Pérez-Asensio, J.N., León, 2018. Mid-late Holocene environmental and cultural dynamics at the south-west tip of Europe (Doñana National Park, SW Iberia, Spain). *Journal of Archaeological Science: Reports* 22, 58–78. <https://doi.org/10.1016/j.jasrep.2018.09.014>
- López-Sáez, J.A., Vargas, G., Ruiz-Fernández, J., Blarquez, O., Alba-Sánchez, F., Oliva, M., Pérez-Díaz, S., Robles-López, S., Abel-Schaad, D., 2017. Paleofire dynamics in Central Spain during the Late Holocene: The role of climatic and anthropogenic forcing. *Land Degradation & Development* 29, 2045–2059. <https://doi.org/10.1002/ldr.2751>
- Luelmo-Lautenschlaeger, R., Blarquez, O., Pérez-Díaz, S., Morales-Molino, C., López-Sáez, J.A., 2019. The Iberian Peninsula's burning heart — Long-term fire history in the Toledo Mountains (Central Spain). *Fire* 2, 54. <https://doi.org/10.3390/fire2040054>
- Luelmo-Lautenschlaeger, R., Pérez-Díaz, S., Alba-Sánchez, F., Abel-Schaad, D., López-Sáez, J., 2018. Vegetation history in the Toledo Mountains (Central Iberia): human impact during the last 1300 years. *Sustainability* 10, 2575. <https://doi.org/10.3390/su10072575>
- Luelmo-Lautenschlaeger, R., Pérez-Díaz, S., Blarquez, O., Morales-Molino, C., López-Sáez, J.A., 2019. The Toledo Mountains: a resilient landscape and a landscape for resilience? *Hazards and strategies in a mid-elevation mountain region in Central Spain. Quaternary* 2, 35. <https://doi.org/10.3390/quat2040035>
- Luly, J.G., 2001. On the equivocal fate of late Pleistocene *Callitris* Vent. (Cupressaceae) woodlands in arid south Australia. *Quaternary International* 83–85, 155–168. [https://doi.org/10.1016/S1040-6182\(01\)00037-4](https://doi.org/10.1016/S1040-6182(01)00037-4)
- Luly, J.G., 1993. Holocene palaeoenvironments near Lake Tyrrell, semi-arid northwestern Victoria, Australia. *Journal of Biogeography* 587–598. <https://doi.org/10.2307/2845516>
- Luly, J.G., Bowler, J.M., Head, M.J., 1986. A radiocarbon chronology from the playa Lake Tyrrell, northwestern Victoria, Australia. *Palaeogeography, Palaeoclimatology, Palaeoecology* 54, 171–180. [https://doi.org/10.1016/0031-0182\(86\)90123-9](https://doi.org/10.1016/0031-0182(86)90123-9)
- Luly, J.G., Jacobson, G., 2000. Two new AMS radiocarbon dates from Lake Frome, arid South Australia. *Quaternary Australasia* 18, 29–33.
- Luo, Y.L., Chen, H.C., Wu, G.X., Sun, X.J., 2001. Records of natural fire and climate history during the last three glacial-interglacial cycles around the South China Sea – Charcoal record from the ODP 1144. *Science in China Series D: Earth Sciences* 44, 897–904. <https://doi.org/10.1007/bf02907081>
- Lynch, E.A., 1998. Origin of a park–forest vegetation mosaic in the Wind River Range, Wyoming. *Ecology* 79, 1320–1338. [https://doi.org/10.1890/0012-9658\(1998\)079\[1320:ooapfv\]2.0.co;2](https://doi.org/10.1890/0012-9658(1998)079[1320:ooapfv]2.0.co;2)
- Lynch, E.A., 1995. Origin of a Park-Forest Vegetation Mosaic in the Wind River Range, Wyoming (PhD dissertation). University of Minnesota, Minneapolis, Minnesota, USA.
- Lynch, J.A., Clark, J.S., Bigelow, N.H., Edwards, M.E., Finney, B.P., 2002. Geographic and temporal variations in fire history in boreal ecosystems of Alaska. *Journal of Geophysical Research: Atmospheres* 107, FFR 8–1–FFR8–17. <https://doi.org/10.1029/2001JD000332>
- Lynch, J.A., Clark, J.S., Stocks, B.J., 2004. Charcoal production, dispersal, and deposition from the Fort Providence experimental fire: interpreting fire regimes from charcoal records in boreal forests. *Canadian Journal of Forest Research* 34, 1642–1656. <https://doi.org/10.1139/x04-071>
- Ma, C., Wang, B., Liu, Z., Zhao, L., Hu, Z.J., Sun, G.P., Yang, Q., Zhou, Y.S., Zheng, H.B., 2018. A preliminary study on vegetation, environment and human activity of pollen records during middle-late



- Holocene in Tianluoshan site, Ningshao Plain. *Quaternary Sciences* 38, 1304–1312. <https://doi.org/10.11928/j.issn.1001-7410.2018.05.22>
- Ma, T., Zheng, Z., Man, M., Dong, Y., Li, J., Huang, K., 2018. Holocene fire and forest histories in relation to climate change and agriculture development in southeastern China. *Quaternary International* 488, 30–40. <https://doi.org/10.1016/j.quaint.2017.07.035>
- Maenza-Gmelch, T.E., 1997a. Holocene vegetation, climate, and fire history of the Hudson Highlands, southeastern New York, USA. *The Holocene* 7, 25–37. <https://doi.org/10.1177/095968369700700103>
- Maenza-Gmelch, T.E., 1997b. Vegetation, climate, and fire during the late-glacial–Holocene Transition at Spruce Pond, Hudson Highlands, southeastern New York, USA. *Journal of Quaternary Science* 12, 15–24. [https://doi.org/10.1002/\(SICI\)1099-1417\(199701/02\)12:1<15::AID-JQS283>3.0.CO;2-T](https://doi.org/10.1002/(SICI)1099-1417(199701/02)12:1<15::AID-JQS283>3.0.CO;2-T)
- Maezumi, S.Y., Robinson, M., de Souza, J., Urrego, D.H., Schaan, D., Alves, D., Iriarte, J., 2018. New insights from Pre-Columbian land use and fire management in Amazonian dark earth forests. *Frontiers in Ecology and Evolution* 6. <https://doi.org/10.3389/fevo.2018.00111>
- Magnan, G., Garneau, M., Le Stum-Boivin, Grondin, P., Bergeron, Y., 2020. Long-term carbon sequestration in boreal forested peatlands in eastern Canada. *Ecosystems* 1–13. <https://doi.org/10.1007/s10021-020-00483-x>
- Magnan, G., Garneau, M., Payette, S., 2014. Holocene development of maritime ombrotrophic peatlands of the St. Lawrence North Shore in eastern Canada. *Quaternary Research* 82, 96–106. <https://doi.org/10.1016/j.yqres.2014.04.016>
- Magnan, G., Lavoie, M., Payette, S., 2012. Impact of fire on long-term vegetation dynamics of ombrotrophic peatlands in northwestern Québec, Canada. *Quaternary Research* 77, 110–121. <https://doi.org/10.1016/j.yqres.2011.10.006>
- Magnan, G., van Bellen, S., Davies, L., Froese, D., Garneau, M., Mullan-Boudreau, G., Zacccone, C., Shotyk, W., 2018. Impact of the Little Ice Age cooling and 20th century climate change on peatland vegetation dynamics in central and northern Alberta using a multi-proxy approach and high-resolution peat chronologies. *Quaternary Science Reviews* 185, 230–243. <https://doi.org/10.1016/j.quascirev.2018.01.015>
- Magri, D., 2004. Two long micro-charcoal records from central Italy, in: *Charcoals from the Past: Cultural and Palaeoenvironmental Implications*. Proceedings of the Third International Meeting of Anthracology. Cavallino, Lecce, Italy, pp. 265–272.
- Magri, D., 1999. Late Quaternary vegetation history at Lagaccione near Lago di Bolsena (central Italy). *Review of Palaeobotany and Palynology* 106, 171–208. [https://doi.org/10.1016/S0034-6667\(99\)00006-8](https://doi.org/10.1016/S0034-6667(99)00006-8)
- Manabe, T., Takahara, H., n.d. Unpublished data.
- Manzano, S., Carrión, J.S., López-Merino, L., Jiménez-Moreno, G., Toney, J.L., Amstrong, H., Anderson, R.S., García-Alix, A., Guerrero Pérez, J.L., Sánchez-Mata, D., 2019. A palaeoecological approach to understanding the past and present of Sierra Nevada, a southwestern European biodiversity hotspot. *Global and Planetary Change* 175, 238–250. <https://doi.org/10.1016/j.gloplacha.2019.02.006>
- Marchant, R., Taylor, D., Hamilton, A., 1997. Late Pleistocene and Holocene history at Mubwindi Swamp, Southwest Uganda. *Quaternary Research* 47, 316–328. <https://doi.org/10.1006/qres.1997.1887>
- Marcisz, K., Gałka, M., Pietrala, P., Miotk-Szpiganowicz, G., Obremaska, M., Tobolski, K., Lamentowicz, M., 2017. Fire activity and hydrological dynamics in the past 5700 years reconstructed from Sphagnum peatlands along the oceanic–continental climatic gradient in northern Poland. *Quaternary Science Reviews* 177, 145–157. <https://doi.org/10.1016/j.quascirev.2017.10.018>
- Marcisz, K., Kołaczek, P., Gałka, M., Diaconu, A.-C., Lamentowicz, M., 2020. Exceptional hydrological stability of a Sphagnum-dominated peatland over the late Holocene. *Quaternary Science Reviews* 231, 106180. <https://doi.org/10.1016/j.quascirev.2020.106180>

- Marcisz, K., Lamentowicz, M., Gałka, M., Colombaroli, D., Adolf, C., Tinner, W., 2019. Responses of vegetation and testate amoeba trait composition to fire disturbances in and around a bog in central European lowlands (northern Poland). *Quaternary Science Reviews* 208, 129–139. <https://doi.org/10.1016/j.quascirev.2019.02.003>
- Marcisz, K., Tinner, W., Colombaroli, D., Kořaczek, P., Słowiński, M., Fiałkiewicz-Kozieł, B., Lokas, E., Lamentowicz, M., 2015. Long-term hydrological dynamics and fire history over the last 2000 years in CE Europe reconstructed from a high-resolution peat archive. *Quaternary Science Reviews* 112, 138–152. <https://doi.org/10.1016/j.quascirev.2015.01.019>
- Marcoux, N., Richard, P.J.H., 1995. Végétation et fluctuations climatiques postglaciaires sur la côte septentrionale gaspésienne, Québec. *Canadian Journal of Earth Sciences* 32, 79–96. <https://doi.org/10.1139/e95-008>
- Margari, V., Gibbard, P.L., Bryant, C.L., Tzedakis, P.C., 2009. Character of vegetational and environmental changes in southern Europe during the last glacial period; evidence from Lesvos Island, Greece. *Quaternary Science Reviews* 28, 1317–1339. <https://doi.org/10.1016/j.quascirev.2009.01.008>
- Margari, V., Pyle, D.M., Bryant, C., Gibbard, P.L., 2007. Mediterranean tephra stratigraphy revisited: results from a long terrestrial sequence on Lesvos Island, Greece. *Journal of Volcanology and Geothermal Research* 163, 34–54. <https://doi.org/10.1016/j.jvolgeores.2007.02.002>
- Marinova, E., n.d. Unpublished data.
- Marinova, E., Atanassova, J., 2006. Anthropogenic impact on vegetation and environment during the Bronze Age in the area of Lake Durankulak, NE Bulgaria: pollen, microscopic charcoal, non-pollen palynomorphs and plant macrofossils. *Review of Palaeobotany and Palynology* 141, 165–178. <https://doi.org/10.1016/j.revpalbo.2006.03.011>
- Marinova, E., Devos, Y.G., Speleers, L., Modrie, S., 2021. The peat profile of Rue des Boîteux–Rue d’Argent (BR295), Senne valley, Brussels (Belgium). *Grana*.
- Marinova, E., Tonkov, S., 2012. A contribution to the Holocene vegetation history in the Northwestern Pirin Mountain (Bulgaria): the plant macrofossil record from peat-bog Mozgovitsa. *Comptes rendus de l’Académie bulgare des Sciences* 65, 1087–1094.
- Markgraf, V., Whitlock, C., Haberle, S.G., 2007. Vegetation and fire history during the last 18,000 cal yr BP in Southern Patagonia: Mallín Pollux, Coyhaique, Province Aisén (45°41’30S, 71°50’30W, 640 m elevation). *Palaeogeography, Palaeoclimatology, Palaeoecology* 254, 492–507. <https://doi.org/10.1016/j.palaeo.2007.07.008>
- Marques Gouveia, S.E., Ruiz Pessenda, L.C., Aravena, R., Boulet, R., Scheel-Ybert, R., Bendassoli, J.A., de Souza Ribeiro, A., de Freitas, H.A., 2002. Carbon isotopes in charcoal and soils in studies of paleovegetation and climate changes during the late Pleistocene and the Holocene in the southeast and centerwest regions of Brazil. *Global and Planetary Change* 33, 95–106. [https://doi.org/10.1016/S0921-8181\(02\)00064-4](https://doi.org/10.1016/S0921-8181(02)00064-4)
- Martin, A.R.H., 1994. Kurnell Fen: an eastern Australian coastal wetland, its Holocene vegetation, relevant to sea-level change and aboriginal land use. *Review of Palaeobotany and Palynology* 80, 311–332. [https://doi.org/10.1016/0034-6667\(94\)90008-6](https://doi.org/10.1016/0034-6667(94)90008-6)
- Martínez Cortizas, A., García-Rodeja, E., Pontevedra Pombal, X., Nóvoa Muñoz, J.C., Weiss, D., Cheburkin, A., 2002. Atmospheric Pb deposition in Spain during the last 4600 years recorded by two ombrotrophic peat bogs and implications for the use of peat as archive. *Science of The Total Environment* 292, 33–44. [https://doi.org/10.1016/S0048-9697\(02\)00031-1](https://doi.org/10.1016/S0048-9697(02)00031-1)
- Masi, A., Francke, A., Pepe, C., Thienemann, M., Wagner, B., Sadori, L., 2018. Vegetation history and paleoclimate at Lake Dojran (FYROM/Greece) during the Late Glacial and Holocene. *Climate of the Past* 14, 351–367. <https://doi.org/10.5194/cp-14-351-2018>
- Mason, S., 2004. Late Holocene Fire Activity at Melling Swamp, Wollemi National Park, NSW (BSc (Hons) thesis). School of Biological, Earth & Environmental Sciences, University of New South Wales, Sydney, Australia.

- Mayle, F.E., Burbridge, R., Killeen, T.J., 2000. Millennial-scale dynamics of southern Amazonian rain forests. *Science* 290, 2291–2294. <https://doi.org/10.1126/science.290.5500.2291>
- Mayr, C., Fey, M., Haberzettl, T., Janssen, S., Lücke, A., Maidana, N.I., Ohlendorf, C., Schäbitz, F., Schleser, G.H., Struck, U., Wille, M., Zolitschka, B., 2005. Palaeoenvironmental changes in southern Patagonia during the last millennium recorded in lake sediments from Laguna Azul (Argentina). *Palaeogeography, Palaeoclimatology, Palaeoecology* 228, 203–227. <https://doi.org/10.1016/j.palaeo.2005.06.001>
- McCarthy, T.S., Ellery, W.N., Backwell, L., Marren, P., de Klerk, B., Tooth, S., Brandt, D., Woodborne, S., 2010. The character, origin and palaeoenvironmental significance of the Wonderkrater spring mound, South Africa. *Journal of African Earth Sciences* 58, 115–126. <https://doi.org/10.1016/j.jafrearsci.2010.02.004>
- McCulloch, R.D., Davies, S.J., 2001. Late-glacial and Holocene palaeoenvironmental change in the central Strait of Magellan, southern Patagonia. *Palaeogeography, Palaeoclimatology, Palaeoecology* 173, 143–173. [https://doi.org/10.1016/s0031-0182\(01\)00316-9](https://doi.org/10.1016/s0031-0182(01)00316-9)
- McGlone, M.S., 2009. Postglacial history of New Zealand wetlands and implications for their conservation. *New Zealand Journal of Ecology* 33, 1–23.
- McGlone, M.S., 2001. The origin of the indigenous grasslands of southeastern South Island in relation to pre-human woody ecosystems. *New Zealand Journal of Ecology* 25, 1–15.
- McGlone, M.S., Turney, C.S.M., Wilmshurst, J.M., 2004. Late-glacial and Holocene vegetation and climatic history of the Cass Basin, central South Island, New Zealand. *Quaternary Research* 62, 267–279. <https://doi.org/10.1016/j.yqres.2004.09.003>
- McGlone, M.S., Wilmshurst, J.M., 1999. A Holocene record of climate, vegetation change and peat bog development, east Otago, South Island, New Zealand. *Journal of Quaternary Science* 14, 239–254. [https://doi.org/10.1002/\(sici\)1099-1417\(199905\)14:3<239::aid-jqs438>3.0.co;2-9](https://doi.org/10.1002/(sici)1099-1417(199905)14:3<239::aid-jqs438>3.0.co;2-9)
- McKenzie, G.M., 2002. The late Quaternary vegetation history of the south-central highlands of Victoria, Australia. II. Sites below 900 m. *Austral Ecology* 27, 32–54. <https://doi.org/10.1046/j.1442-9993.2002.01155.x>
- McKenzie, G.M., 1997. The late Quaternary vegetation history of the south-central highlands of Victoria, Australia. I. Sites above 900 m. *Australian Journal of Ecology* 22, 19–36. <https://doi.org/10.1111/j.1442-9993.1997.tb00638.x>
- McKenzie, G.M., Kershaw, A.P., 2004. A Holocene pollen record from cool temperate rainforest, Aire crossing, the Otway region of Victoria, Australia. *Review of Palaeobotany and Palynology* 132, 281–290. <https://doi.org/10.1016/j.revpalbo.2004.07.006>
- McKenzie, G.M., Kershaw, A.P., 2000. The last glacial cycle from Wyelangta, the Otway region of Victoria, Australia. *Palaeogeography, Palaeoclimatology, Palaeoecology* 155, 177–193. [https://doi.org/10.1016/S0031-0182\(99\)00100-5](https://doi.org/10.1016/S0031-0182(99)00100-5)
- McKenzie, G.M., Kershaw, A.P., 1997. A vegetation history and quantitative estimate of Holocene climate from Chapple Vale, in the Otway Region of Victoria, Australia. *Australian Journal of Botany* 45, 565–581. <https://doi.org/10.1071/bt96051>
- McWethy, D.B., Wilmshurst, J.M., Whitlock, C., Wood, J.R., McGlone, M.S., 2014. A high-resolution chronology of rapid forest transitions following Polynesian arrival in New Zealand. *PLOS ONE* 9, e111328. <https://doi.org/10.1371/journal.pone.0111328>
- Meeks, S.C., 2005. *Paleoecological Analysis of Sediments from Mound G Pond, Shiloh Indian Mounds, Tennessee*. National Park Service.
- Meeks, S.C., 2004. The Influence of Pre-Euro American Fires on Long Leaf Pine Forests in the Southern Appalachians: Evidence from 10,000-Year Pollen and Charcoal Records from the Cahaba Pond Site, East-Central Alabama.
- Meng, M., Jie, D.M., Li, N.N., 2019. The Holocene fire evolution based on charcoal of Gushantun peatland in the Changbai Mountain, Northeast China. *Acta Micropalaeontologica Sinica* 70–78.

- Meyer, G.A., Wells, S.G., Jull, A.J.T., 1995. Fire and alluvial chronology in Yellowstone National Park: Climatic and intrinsic controls on Holocene geomorphic processes. *Geological Society of America Bulletin* 107, 1211–1230. [https://doi.org/10.1130/0016-7606\(1995\)107<1211:faacy>2.3.co;2](https://doi.org/10.1130/0016-7606(1995)107<1211:faacy>2.3.co;2)
- Miao, Y.F., Zhang, D.J., Cai, X.M., Li, F., Jin, H.L., Wang, Y.P., Liu, B., 2017. Holocene fire on the northeast Tibetan Plateau in relation to climate change and human activity. *Quaternary International* 443, 124–131. <https://doi.org/10.1016/j.quaint.2016.05.029>
- Miebach, A., Stolzenberger, S., Wacker, L., Hense, A., Litt, T., 2019. A new Dead Sea pollen record reveals the last glacial paleoenvironment of the southern Levant. *Quaternary Science Reviews* 214, 98–116. <https://doi.org/10.1016/j.quascirev.2019.04.033>
- Millet, L., Ortu, E., Miras, Y., Heiri, O., Magny, M., de Beaulieu, J.-L., 2008a. Les assemblages de Chironomidae et les cortèges polliniques, outils de reconstitutions quantitatives des changements du climat holocène: une approche croisée au Col du Petit St Bernard, lac Dessus-Verney, 2280 m – Quantitative reconstruction of Holocene climate from Chironomid and pollen assemblages, Lake Dessus-Verney (Col du Petit St Bernard, 2280 m a.s.l) as a case study. *Collection EDYTEM. Cahiers de géographie* 6, 65–76. <https://doi.org/10.3406/edyte.2008.1029>
- Millet, L., Ortu, E., Miras, Y., Heiri, O., Magny, M., de Beaulieu, J.-L., 2008b. Les assemblages de Chironomidae et les cortèges polliniques, outils de reconstitutions quantitatives des changements du climat holocène: une approche croisée au Col du Petit St Bernard, lac guillemotleftDessus-Verneyguillemotright, 2280 m. *Collection EDYTEM. Cahiers de géographie* 6, 65–76.
- Millspaugh, S.H., 1997. Late-Glacial and Holocene Variations in Fire Frequency in the Central Plateau and Yellowstone-Lamar Provinces of Yellowstone National Park (PhD thesis). University of Oregon, Eugene, Oregon, USA.
- Millspaugh, S.H., Whitlock, C., Bartlein, P.J., 2000. Variations in fire frequency and climate over the past 17 000 yr in central Yellowstone National Park. *Geology* 28, 211–214. [https://doi.org/10.1130/0091-7613\(2000\)28<211:viffac>2.0.co;2](https://doi.org/10.1130/0091-7613(2000)28<211:viffac>2.0.co;2)
- Minckley, T.A., Whitlock, C., Bartlein, P.J., 2007. Vegetation, fire, and climate history of the northwestern Great Basin during the last 14,000 years. *Quaternary Science Reviews* 26, 2167–2184. <https://doi.org/10.1016/j.quascirev.2007.04.009>
- Miras, Y., Millet, L., Guiter, F., Ponel, P., de Beaulieu, J.-L., Gozlar, T., 2006. Dynamique des écosystèmes et impact de l’homme dans le secteur du col du Petit Saint Bernard au cours de l’Holocène, in: pp. 31–50. <https://doi.org/10013/epic.44366.d491>
- Miras, Y., Millet, L., Guiter, F., Ponel, P., de Beaulieu, J.-L., Gozlar, T., 2000. Dynamique des écosystèmes et impact de l’homme dans le secteur du col du Petit Saint Bernard au cours de l’Holocène. *Actes Du Séminaire de Clôture Du Programme INTERREG III A ALCOTRA 2006*, 31–50.
- Miras, Y., Surmely, F., Guenet, P., Vannièrè, B., Walter-Simonnet, A.-V., Tzortzis, S., 2006. Dynamiques d’occupation et histoire de l’environnement d’un terroir de moyenne montagne: la tourbière de Peyre (Lacapelle-Barrès, Cantal, Massif Central) et ses alentours, in: Miras, Y., Surmely, F. (Eds.), *Environnement et peuplement de la moyenne montagne du tardiglaciaire à nos jours*. pp. 157–184.
- Miroslaw-Grabowska, J., Zawisza, E., Jaskółka, A., Obremaska, M., 2015. Natural transformation of the Romoty paleolake (NE Poland) during the Late Glacial and Holocene based on isotopic, pollen, cladoceran and geochemical data. *Quaternary International* 386, 171–185. <https://doi.org/10.1016/j.quaint.2015.06.040>
- Mitchell, F.J.G., 1988. The vegetational history of the Killarney oakwoods, SW Ireland: Evidence from fine spatial resolution pollen analysis. *The Journal of Ecology* 76, 415–436. <https://doi.org/10.2307/2260603>
- Mitchell, F.J.G., Cole, E., 1998. Reconstruction of long-term successional dynamics of temperate woodland in Bialowieza Forest, Poland. *Journal of Ecology* 86, 1042–1059. <https://doi.org/10.1046/j.1365-2745.1998.00323.x>
- Miyoshi, S., Takahara, H., n.d. Unpublished data.



- Moeyersons, J., Nyssen, J., Poesen, J., Deckers, J., Haile, M., 2006. Age and backfill/overflow stratigraphy of two tufa dams, Tigray Highlands, Ethiopia: evidence for Late Pleistocene and Holocene wet conditions. *Palaeogeography, Palaeoclimatology, Palaeoecology* 230, 165–181. <https://doi.org/10.1016/j.palaeo.2005.07.013>
- Mohr, J.A., Whitlock, C., Skinner, C.N., 2000. Postglacial vegetation and fire history, eastern Klamath Mountains, California, USA. *The Holocene* 10, 587–601. <https://doi.org/10.1191/095968300675837671>
- Molinari, C., 2002. 2500 Years of Forest Dynamics at Sondre Skog, a Semi-Natural Forest on Hollands Vaddero Island, Southern Sweden (MSc thesis). Turin University, Torino, Italy.
- Molinari, C., Bradshaw, R.H.W., Risbol, O., Lie, M., Ohlson, M., 2005. Long-term vegetational history of a *Picea abies* stand in south-eastern Norway: implications for the conservation of biological values. *Biological Conservation* 126, 155–165. <https://doi.org/10.1016/j.biocon.2005.05.007>
- Mooney, S.D., n.d. Unpublished data.
- Mooney, S.D., Maltby, E.L., 2006. Two proxy records revealing the late Holocene fire history at a site on the central coast of New South Wales, Australia. *Austral Ecology* 31, 682–695. <https://doi.org/10.1111/j.1442-9993.2006.01594.x>
- Mooney, S.D., Watson, J.R., Dodson, J.R., 1997. Late Holocene environmental change in an upper montane area of the Snowy Mountains, New South Wales. *Australian Geographer* 28, 185–200. <https://doi.org/10.1080/00049189708703192>
- Mooney, S.D., Webb, M., Attenbrow, V., 2007. A comparison of charcoal and archaeological information to address the influences on Holocene fire activity in the Sydney Basin. *Australian Geographer* 38, 177–194. <https://doi.org/10.1080/00049180701392774>
- Morales-Molino, C., Colombaroli, D., Tinner, W., Perea, R., Valbuena-Carabaña, M., Carrión, J.S., Gil, L., 2018. Vegetation and fire dynamics during the last 4000 years in the Cabañeros National Park (central Spain). *Review of Palaeobotany and Palynology* 253, 110–122. <https://doi.org/10.1016/j.revpalbo.2018.04.001>
- Morales-Molino, C., Colombaroli, D., Valbuena-Carabaña, M., Tinner, W., Salomón, R.L., Carrión, J.S., Gil, L., 2017. Land-use history as a major driver for long-term forest dynamics in the Sierra de Guadarrama National Park (central Spain) during the last millennia: implications for forest conservation and management. *Global and Planetary Change* 152, 64–75. <https://doi.org/10.1016/j.gloplacha.2017.02.011>
- Morales-Molino, C., Tinner, W., García-Antón, M., Colombaroli, D., 2017. The historical demise of *Pinus nigra* forests in the Northern Iberian Plateau (south-western Europe). *Journal of Ecology* 105, 634–646. <https://doi.org/10.1111/1365-2745.12702>
- Morales-Molino, C., Tinner, W., Perea, R., Carrión, J.S., Colombaroli, D., Valbuena-Carabaña, M., Zafra, E., Gil, L., 2019. Unprecedented herbivory threatens rear-edge populations of *Betula* in southwestern Eurasia. *Ecology* 100, e02833. <https://doi.org/10.1002/ecy.2833>
- Moreno, P.I., 1997. Vegetation and climate near Lago Llanquihue in the Chilean Lake District between 20200 and 9500 <sup>14</sup>C yr BP. *Journal of Quaternary Science* 12, 485–500. [https://doi.org/10.1002/\(sici\)1099-1417\(199711/12\)12:6<485::aid-jqs330>3.3.co;2-w](https://doi.org/10.1002/(sici)1099-1417(199711/12)12:6<485::aid-jqs330>3.3.co;2-w)
- Moreno, P.I., 1993. Vegetation and Climate near Lago Llanquihue in the Chilean Lake District (MSc thesis). University of Maine, Orono, Maine, USA.
- Moreno, P.I., León, A.L., 2003. Abrupt vegetation changes during the Last Glacial to Holocene transition in mid-latitude South America. *Journal of Quaternary Science* 18, 787–800. <https://doi.org/10.1002/jqs.801>
- Moreno, P.I., Lowell, T.V., Jacobson Jr, G.L., Denton, G.H., 1999. Abrupt vegetation and climate changes during the Last Glacial Maximum and Last Termination in the Chilean Lake District: a case study from Canal De La Puntilla (41°S). *Geografiska Annaler, Series A: Physical Geography* 81, 285–311. <https://doi.org/10.1111/j.0435-3676.1999.00059.x>

- Moreno, P.I., Videla, J., 2016. Centennial and millennial-scale hydroclimate changes in northwestern Patagonia since 16,000 yr BP. *Quaternary Science Reviews* 149, 326–337. <https://doi.org/10.1016/j.quascirev.2016.08.008>
- Moss, P.T., Kershaw, A.P., 2000. The last glacial cycle from the humid tropics of northeastern Australia: comparison of a terrestrial and a marine record. *Palaeogeography, Palaeoclimatology, Palaeoecology* 155, 155–176. [https://doi.org/10.1016/s0031-0182\(99\)00099-1](https://doi.org/10.1016/s0031-0182(99)00099-1)
- Moss, P.T., Thomas, I., Macphail, M., 2007. Late Holocene vegetation and environments of the Mersey Valley, Tasmania. *Australian Journal of Botany* 55, 74–82. <https://doi.org/10.1071/bt06010>
- Mourguiart, P., Ledru, M.-P., 2003. Last glacial maximum in an Andean cloud forest environment (Eastern Cordillera, Bolivia). *Geology* 31, 195–198. [https://doi.org/10.1130/0091-7613\(2003\)031<0195:lgmiaa>2.0.co;2](https://doi.org/10.1130/0091-7613(2003)031<0195:lgmiaa>2.0.co;2)
- Mu, Y., Qin, X., Zhang, L., Xu, B., 2017. Link between black carbon, fires, climate change, and human activity during the Holocene period shown in the loess-paleosol sequence from Henan, China. *Quaternary Research* 87, 288–297. <https://doi.org/10.1017/qua.2016.18>
- Mu, Y., Qin, X., Zhang, L., Xu, B., 2016. Holocene climate change evidence from high-resolution loess/paleosol records and the linkage to fire–climate change–human activities in the Horqin dunefield in northern China. *Journal of Asian Earth Sciences* 121, 1–8. <https://doi.org/10.1016/j.jseaes.2016.01.017>
- Neil, K., Gajewski, K., Betts, M., 2014. Human-ecosystem interactions in relation to Holocene environmental change in Port Joli Harbour, southwestern Nova Scotia, Canada. *Quaternary Research* 81, 203–212. <https://doi.org/10.1016/j.yqres.2014.01.001>
- Nelson, D.M., Hu, F.S., Grimm, E.C., Curry, B.B., Slate, J.E., 2006. The influence of aridity and fire on Holocene prairies communities in the eastern Prairie Peninsula. *Ecology* 87, 2523–2536. [https://doi.org/10.1890/0012-9658\(2006\)87\[2523:tioaaf\]2.0.co;2](https://doi.org/10.1890/0012-9658(2006)87[2523:tioaaf]2.0.co;2)
- Nelson, D.M., Hu, F.S., Tian, J., Stefanova, I., Brown, T.A., 2003. Response of C3 and C4 plants to middle-Holocene climatic variation near the prairie-forest ecotone of Minnesota. *Proceedings of the National Academy of Sciences* 101, 562–567. <https://doi.org/10.1073/pnas.0307450100>
- Neumann, F.H., Stager, J.C., Scott, L., Venter, H.J.T., Weyhenmeyer, C., 2008. Holocene vegetation and climate records from lake Sibaya, KwaZulu-Natal (South Africa). *Review of Palaeobotany and Palynology* 152, 113–128. <https://doi.org/10.1016/j.revpalbo.2008.04.006>
- New, J., 2007. Holocene Charcoal-based Alluvial Fire Chronology and Geomorphic Implications in Caballero Canyon, Sacramento Mountains, New Mexico (MSc thesis). Department of Earth; Planetary Sciences, University of New Mexico, Albuquerque, New Mexico, USA.
- Newnham, R.M., Lowe, D.J., 2000. Fine-resolution pollen record of late-glacial climate reversal from New Zealand. *Geology* 28, 759–762. [https://doi.org/10.1130/0091-7613\(2000\)028<0759:frprol>2.3.co;2](https://doi.org/10.1130/0091-7613(2000)028<0759:frprol>2.3.co;2)
- Newnham, R.M., Lowe, D.J., Giles, T., Alloway, B.V., 2007. Vegetation and climate of Auckland, New Zealand, since ca. 32 000 cal. yr ago: support for an extended LGM. *Journal of Quaternary Science* 22, 517–534. <https://doi.org/10.1002/jqs.1137>
- Newnham, R.M., Lowe, D.J., Matthews, B.W., 1998. A late-Holocene and prehistoric record of environmental change from Lake Waikaremoana, New Zealand. *The Holocene* 8, 443–454. <https://doi.org/10.1191/095968398672490834>
- Newnham, R.M., Vandergoes, M.J., Hendy, C.H., Lowe, D.J., Preusser, F., 2007. A terrestrial palynological record for the last two glacial cycles from southwestern New Zealand. *Quaternary Science Reviews* 26, 517–535. <https://doi.org/10.1016/j.quascirev.2006.05.005>
- Niemann, H., Behling, H., 2009a. Late Holocene environmental change and human impact inferred from three soil monoliths and the Laguna Zurita multi-proxi record in the southeastern Ecuadorian Andes. *Vegetation History and Archaeobotany* 19, 1–15. <https://doi.org/10.1007/s00334-009-0226-6>

- Niemann, H., Behling, H., 2009b. Late Pleistocene and Holocene environmental change inferred from the Cocha Caranga sediment and soil records in the southeastern Ecuadorian Andes. *Palaeogeography, Palaeoclimatology, Palaeoecology* 276, 1–14. <https://doi.org/10.1016/j.palaeo.2009.02.018>
- Niemann, H., Behling, H., 2008. Late Quaternary vegetation, climate and fire dynamics inferred from the El Tiro record in the southeastern Ecuadorian Andes. *Journal of Quaternary Science* 23, 203–212. <https://doi.org/10.1002/jqs.1134>
- Niemann, H., Haberzettl, T., Behling, H., 2009. Holocene climate variability and vegetation dynamics inferred from the (11700 cal. yr BP) Laguna Rabadilla de Vaca sediment record, southeastern Ecuadorian Andes. *The Holocene* 19, 307–316. <https://doi.org/10.1177/0959683608100575>
- Niinemets, E., Saarse, L., 2007a. Fine-resolution pollen-based evidences of farming and forest development, south-eastern Estonia. *Polish Journal of Ecology* 55, 283–296.
- Niinemets, E., Saarse, L., 2007b. Mid- and late-Holocene land-use changes inferred from pollen records, in a south-eastern Estonian upland area. *Review of Palaeobotany and Palynology* 146, 51–73. <https://doi.org/10.1016/j.revpalbo.2007.03.004>
- Niinemets, E., Saarse, L., 2006. Holocene forest dynamics and human impact in southeastern Estonia. *Vegetation History and Archaeobotany* 16, 1–13. <https://doi.org/10.1007/s00334-005-0030-x>
- Niinemets, E., Saarse, L., Poska, A., 2002. Vegetation history and human impact in the Parika area, Central Estonia, in: *Proceedings of the Estonian Academy of Sciences, Geology*. pp. 241–258.
- Nishimura, R., n.d. Unpublished data.
- Nogué, S., de Nascimento, L., Fernández-Palacios, J.M., Whittaker, R.J., Willis, K.J., 2013. The ancient forests of La Gomera, Canary Islands, and their sensitivity to environmental change. *Journal of Ecology* 101, 368–377. <https://doi.org/10.1111/1365-2745.12051>
- Nogué, S., Tovar, C., Bhagwat, S.A., Finsinger, W., Willis, K.J., 2017. Exploring the ecological history of a tropical agroforestry landscape using fossil pollen and charcoal analysis from four sites in Western Ghats, India. *Ecosystems* 21, 45–55. <https://doi.org/10.1007/s10021-017-0132-1>
- Norström, E., Scott, L., Partridge, T.C., Risberg, J., Holmgren, K., 2009. Reconstruction of environmental and climate changes at Braamhoek wetland, eastern escarpment South Africa, during the last 16,000 years with emphasis on the Pleistocene–Holocene transition. *Palaeogeography, Palaeoclimatology, Palaeoecology* 271, 240–258. <https://doi.org/10.1016/j.palaeo.2008.10.018>
- Northrop, L.A., Horn, S.P., 1996. PreColumbian agriculture and forest disturbance in Costa Rica: palaeoecological evidence from two lowland rainforest lakes. *The Holocene* 6, 289–299. <https://doi.org/10.1177/095968369600600304>
- Noti, R., van Leeuwen, J.F.N., Colombaroli, D., Vescovi, E., Pasta, S., La Mantia, T., Tinner, W., 2009. Mid- and late-Holocene vegetation and fire history at Biviere di Gela, a coastal lake in southern Sicily, Italy. *Vegetation History and Archaeobotany* 18, 371–387. <https://doi.org/10.1007/s00334-009-0211-0>
- Novenko, E.Y., Tsyganov, A.N., Payne, R.J., Mazei, N.G., Volkova, E.M., Chernyshov, V.A., Kupriyanov, D.A., Mazei, Y.A., 2018. Vegetation dynamics and fire history at the southern boundary of the forest vegetation zone in European Russia during the middle and late Holocene. *The Holocene* 28, 308–322. <https://doi.org/10.1177/0959683617721331>
- Novenko, E.Y., Tsyganov, A.N., Rudenko, O.V., Volkova, E.V., Zuyganova, I.S., Babeshko, K.V., Olchev, A.V., Losbenev, N.I., Payne, R.J., Mazei, Y.A., 2016. Mid- and late-Holocene vegetation history, climate and human impact in the forest-steppe ecotone of European Russia: new data and a regional synthesis. *Biodiversity and Conservation* 25, 2453–2472. <https://doi.org/10.1007/s10531-016-1051-8>
- Novenko, E.Y., Tsyganov, A.N., Volkova, E.M., Kupriyanov, D.A., Mironenko, I.V., Babeshko, K.V., Utkina, A.S., Popov, V., Mazei, Y.A., 2016. Mid- and Late Holocene vegetation dynamics and fire history in the boreal forest of European Russia: A case study from Meshchera Lowlands. *Palaeogeography, Palaeoclimatology, Palaeoecology* 459, 570–584. <https://doi.org/10.1016/j.palaeo.2016.08.004>

- Odgaard, B.V., 1994. The Holocene vegetation history of northern West Jutland, Denmark. *Nordic Journal of Botany* 14, 546.0. <https://doi.org/10.1111/j.1756-1051.1994.tb00649.x>
- Ogden, J., Basher, L., McGlone, M., 1998. Botanical briefing fire, forest regeneration and links with early human habitation: evidence from New Zealand. *Annals of Botany* 81, 687–696. <https://doi.org/10.1006/anbo.1998.0637>
- Ogura, A., Krivonogov, S.K., Takahara, H., n.d. Unpublished data.
- Ogura, J., 2002. A study of microscopic charcoal particles included in the samples used for the pollen analysis of Midoroga-ike Pond. *Journal of Kyoto Seika University* 21, 268–288.
- Olsson, F., Gaillard, M.-J., Lemdahl, G., Greisman, A., Lanos, P., Marguerie, D., Marcoux, N., Skoglund, P., Wäglind, J., 2010. A continuous record of fire covering the last 10,500 calendar years from southern Sweden—The role of climate and human activities. *Palaeogeography, Palaeoclimatology, Palaeoecology* 291, 128–141. <https://doi.org/10.1016/j.palaeo.2009.07.013>
- Olsson, F., Lemdahl, G., 2010. A forest history for the last 10 900 years at the site Storasjö, southern Sweden: implications from beetle assemblages. *Journal of Quaternary Science* 25, 1211–1221. <https://doi.org/10.1002/jqs.1400>
- Oris, F., Asselin, H., Finsinger, W., Hély, C., Blarquez, O., Ferland, M.-E., Bergeron, Y., Ali, A.A., 2014. Long-term fire history in northern Quebec: implications for the northern limit of commercial forests. *Journal of Applied Ecology* 51, 675–683. <https://doi.org/10.1111/1365-2664.12240>
- Ortega, B., Caballero, M., Lozano-García, M. d.S, Vilaclara, G., Rodríguez, A., 2006. Rock magnetic and geochemical proxies for iron mineral diagenesis in a tropical lake: Lago Verde, Los Tuxtlas, East-Central Mexico. *Earth and Planetary Science Letters* 250, 444–458. <https://doi.org/10.1016/j.epsl.2006.08.020>
- Ortu, E., Brewer, S., Peyron, O., 2006. Pollen-inferred palaeoclimate reconstructions in mountain areas: problems and perspectives. *Journal of Quaternary Science* 21, 615–627. <https://doi.org/10.1002/jqs.998>
- Ortu, E., David, F., Caramiello, R., 2005. Effet des paramètres locaux sur le développement de la végétation dans le Vallon de St. Anna di Vinadio (Alpes Maritimes; Italie). *Ecoscience* 12, 122–135. <https://doi.org/10.2980/i1195-6860-12-1-122.1>
- Ortu, E., David, F., Caramiello, R., 2003. Rôle de l'homme dans l'histoire de la végétation de la vallée Ellero (Alpes maritimes, Italie) – Man's role in the vegetation history in the Ellero Valley (Maritime Alps, Italy). *Comptes Rendus Biologies* 326, 631–637. [https://doi.org/10.1016/S1631-0691\(03\)00155-0](https://doi.org/10.1016/S1631-0691(03)00155-0)
- Ortu, E., Peyron, O., Bordon, A., de Beaulieu, J.-L., Siniscalco, C., Caramiello, R., 2008. Lateglacial and Holocene climate oscillations in the South-western Alps: an attempt at quantitative reconstruction. *Quaternary International* 190, 71–88. <https://doi.org/10.1016/j.quaint.2008.04.004>
- Oswald, W.W., n.d. Unpublished data.
- Oswald, W.W., Faison, E.K., Foster, D.R., Doughty, E.D., Hall, B.R., Hansen, B.C.S., 2007. Post-glacial changes in spatial patterns of vegetation across southern New England. *Journal of Biogeography* 34, 900–913. <https://doi.org/10.1111/j.1365-2699.2006.01650.x>
- Oswald, W.W., Foster, D.R., 2013. Lake Sediment Pollen from Blood Pond in Dudley MA from 15000 BP to Present. <https://doi.org/10.6073/pasta/e21028d656c7dad6c50e2b3539825f23>
- Oswald, W.W., Foster, D.R., Doughty, E.D., Macdonald, D., 2010. A record of Holocene environmental and ecological changes from Wildwood Lake, Long Island, New York. *Journal of Quaternary Science* 25, 967–974. <https://doi.org/10.1002/jqs.1381>
- Oswald, W.W., Foster, D.R., Shuman, B.N., Chilton, E.S., Doucette, D.L., Duranleau, D.L., 2020. Conservation implications of limited Native American impacts in pre-contact New England. *Nature Sustainability* 3, 241–246. <https://doi.org/10.1038/s41893-019-0466-0>
- Oswald, W.W., Foster, D.R., Shuman, B.N., Doughty, E.D., Faison, E.K., Hall, B.R., Hansen, B.C.S., Lindbladh, M., Marroquin, A., Truebe, S.A., 2018. Subregional variability in the response of New England



- vegetation to postglacial climate change. *Journal of Biogeography* 45, 2375–2388.  
<https://doi.org/10.1111/jbi.13407>
- Paduano, G.M., Bush, M.B., Baker, P.A., Fritz, S.C., Seltzer, G.O., 2003. A vegetation and fire history of Lake Titicaca since the Last Glacial Maximum. *Palaeogeography, Palaeoclimatology, Palaeoecology* 194, 259–279. [https://doi.org/10.1016/S0031-0182\(03\)00281-5](https://doi.org/10.1016/S0031-0182(03)00281-5)
- Paillard, J., n.d. Unpublished data.
- Paquette, N., Gajewski, K., 2013. Climatic change causes abrupt changes in forest composition, inferred from a high-resolution pollen record, southwestern Quebec, Canada. *Quaternary Science Reviews* 75, 169–180. <https://doi.org/10.1016/j.quascirev.2013.06.007>
- Parshall, T., Foster, D.R., 2002. Fire on the New England landscape: regional and temporal variation, cultural and environmental controls. *Journal of Biogeography* 29, 1305–1317.  
<https://doi.org/10.1046/j.1365-2699.2002.00758.x>
- Parshall, T., Foster, D.R., Faison, E., MacDonald, D., Hansen, B.C.S., 2003. Long-term history of vegetation and fire in pitch pine–oak forests on Cape Cod, Massachusetts. *Ecology* 84, 736–748.  
[https://doi.org/10.1890/0012-9658\(2003\)084\[0736:LTHOVA\]2.0.CO;2](https://doi.org/10.1890/0012-9658(2003)084[0736:LTHOVA]2.0.CO;2)
- Partridge, T.C., Demenocal, P.B., Lorentz, S.A., Paiker, M.J., Vogel, J.C., 1997. Orbital forcing of climate over South Africa: a 200,000-year rainfall record from the Pretoria Saltpan. *Quaternary Science Reviews* 16, 1125–1133. [https://doi.org/10.1016/S0277-3791\(97\)00005-X](https://doi.org/10.1016/S0277-3791(97)00005-X)
- Pederson, D.C., Peteet, D.M., Kurdyla, D., Guilderson, T., 2005. Medieval Warming, Little Ice Age, and European impact on the environment during the last millennium in the lower Hudson Valley, New York, USA. *Quaternary Research* 63, 238–249. <https://doi.org/10.1016/j.yqres.2005.01.001>
- Penny, D., Kealhofer, L., 2005. Microfossil evidence of land-use intensification in north Thailand. *Journal of Archaeological Science* 32, 69–82. <https://doi.org/10.1016/j.jas.2004.07.002>
- Pesce, O.H., Moreno, P.I., 2014. Vegetation, fire and climate change in central-east Isla Grande de Chiloé (43°S) since the Last Glacial Maximum, northwestern Patagonia. *Quaternary Science Reviews* 90, 143–157. <https://doi.org/10.1016/j.quascirev.2014.02.021>
- Petersen, K.L., 1988. Climate and the Dolores River Anasazi: A paleoenvironmental reconstruction from a 10,000-Year pollen record, La Plata Mountains, southwestern Colorado. *University of Utah Anthropological Papers* 113, 152.0.
- Petherick, L., McGowan, H., Moss, P., 2008. Climate variability during the Last Glacial Maximum in eastern Australia: evidence of two stadials? *Journal of Quaternary Science* 23, 787–802.  
<https://doi.org/10.1002/jqs.1186>
- Pérez-Díaz, S., López-Sáez, J.A., 2019. The Western Pyrenean (Northern Iberian Peninsula) during the Upper Paleolithic: a palaeoenvironmental approach, in: Schmidt, I., Cascalheira, J., Bicho, N., Weniger, G.-C. (Eds.), *Human Adaptations to the Last Glacial Maximum: The Solutrean and its Neighbors*. Cambridge Scholars Publishing.
- Pérez-Díaz, S., López-Sáez, J.A., 2017. 33. Verdeospesoa mire (Basque Country, Northern Iberian Peninsula, Spain). *Grana* 56, 315–317. <https://doi.org/10.1080/00173134.2016.1271824>
- Pérez-Díaz, S., López-Sáez, J.A., Núñez de la Fuente, S., Ruiz-Alonso, M., 2018. Early farmers, megalithic builders and the shaping of the cultural landscapes during the Holocene in Northern Iberian mountains. A palaeoenvironmental perspective. *Journal of Archaeological Science: Reports* 18, 463–474. <https://doi.org/10.1016/j.jasrep.2018.01.043>
- Pérez-Sanz, A., González-Sampériz, P., Moreno, A., Valero-Garcés, B., Gil-Romera, G., Rieradevall, M., Tarrats, P., Lasheras-Álvarez, L., Morellón, M., Belmonte, A., Sancho, C., Sevilla-Callejo, M., Navas, A., 2013. Holocene climate variability, vegetation dynamics and fire regime in the central Pyrenees: the Basa de la Mora sequence (NE Spain). *Quaternary Science Reviews* 73, 149–169.  
<https://doi.org/10.1016/j.quascirev.2013.05.010>
- Pędziszewska, A., Latałowa, M., 2016. Stand-scale reconstruction of late Holocene forest succession on the Gdańsk Upland (N. Poland) based on integrated palynological and macrofossil data from paired

- sites. *Vegetation History and Archaeobotany* 25, 239–254. <https://doi.org/10.1007/s00334-015-0546-7>
- Pędziszewska, A., Tylmann, W., Witak, M., Piotrowska, N., Maciejewska, E., Latałowa, M., 2015. Holocene environmental changes reflected by pollen, diatoms, and geochemistry of annually laminated sediments of Lake Suminko in the Kashubian Lake District (N Poland). *Review of Palaeobotany and Palynology* 216, 55–75. <https://doi.org/10.1016/j.revpalbo.2015.01.008>
- Pierce, J.L., Meyer, G.A., Jull, A.J.T., 2004. Fire-induced erosion and millennial-scale climate change in northern ponderosa pine forests. *Nature* 432, 87–90. <https://doi.org/10.1038/nature03058>
- Pilote, L.-M., Garneau, M., van Bellen, S., Lamothe, M., 2018. Multiproxy analysis of inception and development of the Lac-à-la-Tortue peatland complex, St Lawrence Lowlands, eastern Canada. *Boreas* 47, 1084–1101. <https://doi.org/10.1111/bor.12337>
- Pini, R., 2002. A high-resolution Late-Glacial–Holocene pollen diagram from Pian di Gembro (Central Alps, Northern Italy). *Vegetation History and Archaeobotany* 11, 251–262. <https://doi.org/10.1007/s003340200038>
- Pini, R., Ravazzi, C., Donegana, M., 2009. Pollen stratigraphy, vegetation and climate history of the last 215ka in the Azzano Decimo core (plain of Friuli, north-eastern Italy). *Quaternary Science Reviews* 28, 1268–1290. <https://doi.org/10.1016/j.quascirev.2008.12.017>
- Pittock, J., 1989. Palaeoenvironments of the Mt. Disappointment Plateau (Kinglake West, Victoria), from the Late Pleistocene (BSc (Hons) thesis). Department of Geography; Environmental Science, Monash University, Melbourne, Australia.
- Pokorný, P., 2016. 29. Vrbka (Czech Republic): Pollen record of secondary steppe vegetation development within the Bronze Age agricultural landscape. *Grana* 55, 246–249. <https://doi.org/10.1080/00173134.2015.1120342>
- Pokorný, P., 2005. Role of man in the development of Holocene vegetation in Central Bohemia. *Preslia* 77, 113–128. <https://doi.org/10013/epic.44114.d007>
- Pokorný, P., 2002. A high-resolution record of Late-Glacial and Early-Holocene climatic and environmental change in the Czech Republic. *Quaternary International* 91, 101–122. [https://doi.org/10.1016/S1040-6182\(01\)00105-7](https://doi.org/10.1016/S1040-6182(01)00105-7)
- Pokorný, P., Jankovská, V., 2000. Long-term vegetation dynamics and the infilling process of a former lake (Švarcenberk, Czech Republic). *Folia Geobotanica* 35, 433–457. <https://doi.org/10.1007/BF02803554>
- Pokorný, P., Klimešová, J., Klimeš, L., 2000. Late Holocene history and vegetation dynamics of a floodplain alder carr: a case study from eastern Bohemia, Czech Republic. *Folia Geobotanica* 35, 43–58. <https://doi.org/10.1007/BF02803086>
- Pokorný, P., Kuneš, P., 2009. 5. Kožlí (S. Bohemia, Czech Republic). *Grana* 48, 77–78. <https://doi.org/10.1080/00173130902759816>
- Pokorný, P., Kuneš, P., 2005. Holocene acidification process recorded in three pollen profiles from Czech sandstone and river terrace environments. *Ferrantia* 44, 107–112. <https://doi.org/10013/epic.44114.d010>
- Pokorný, P., Kuneš, P., Abraham, V., 2008. Holocenní vývoj vegetace v Českém Svýcarsku, in: Bauer, P., Kopecký, V., Smucar, J. (Eds.), *Labské pískovce - historie, příroda a ochrana území*. Agentura ochrany přírody a krajiny České republiky, Správa CHKO Labské pískovce, Děčín, Czech Republic, pp. 35–49.
- Pokorný, P., Sádlo, J., Bernardová, A., 2010. Holocene history of *Cladium mariscus* (L.) Pohl in the Czech Republic. Implications for species population dynamics and palaeoecology. *Acta Palaeobotanica* 50, 65–76.
- Pokorný, P., van der Knaap, W.O., 2011. 15. Brve (Czech Republic): Vegetation development over the last about 2.5 millennia in the Bohemian Lowland close to Prague. *Grana* 50, 311–313. <https://doi.org/10.1080/00173134.2011.645551>

- Pokorný, P., van der Knaap, W.O., 2010. 10. Na Bahně (Czech Republic): Vegetation development over the last 2.5 millennia in the Eastern Bohemian lowland. *Grana* 49, 79–81. <https://doi.org/10.1080/00173130903435846>
- Polach, H., Singh, G., 1980. Contemporary  $^{14}\text{C}$  levels and their significance to sedimentary history of Bega Swamp, New South Wales. *Radiocarbon* 22, 398–409. <https://doi.org/10.1017/s0033822200009693>
- Pompeani, D.P., Cooke, C.A., Abbott, M.B., Drevnick, P.E., 2018. Climate, fire, and vegetation mediate mercury delivery to midlatitude lakes over the Holocene. *Environmental Science & Technology* 52, 8157–8164. <https://doi.org/10.1021/acs.est.8b01523>
- Poska, A., 1994. Three Pollen Diagrams from Coastal Estonia: Sediments, Vegetational Development, Climatic Events and the Environmental Impact of Man. Uppsala universitet.
- Poska, A., Saarse, L., 2006. New evidence of possible crop introduction to north-eastern Europe during the Stone Age. *Vegetation History and Archaeobotany* 15, 169–179. <https://doi.org/10.1007/s00334-005-0024-8>
- Poska, A., Saarse, L., 2002a. Biostratigraphy and  $^{14}\text{C}$  dating of a lake sediment sequence on the north-west Estonian carbonaceous plateau, interpreted in terms of human impact in the surroundings. *Vegetation History and Archaeobotany* 11, 191–200. <https://doi.org/10.1007/s003340200022>
- Poska, A., Saarse, L., 2002b. Vegetation development and introduction of agriculture to Saaremaa Island, Estonia: the human response to shore displacement. *The Holocene* 12, 555–568. <https://doi.org/10.1191/0959683602h1567rp>
- Poska, A., Saarse, L., 1999. Holocene vegetation and land-use history in the environs of Lake Kahala, northern Estonia. *Vegetation History and Archaeobotany* 8, 185–197. <https://doi.org/10.1007/bf02342719>
- Power, M.J., n.d. Unpublished data.
- Power, M.J., 1998. Unpublished data (MSc thesis). Northern Arizona University, Flagstaff, Arizona, USA.
- Power, M.J., Whitlock, C., Bartlein, P.J., Stevens, L.R., 2006. Fire and vegetation history during the last 3800 years in northwestern Montana. *Geomorphology* 75, 420–436. <https://doi.org/10.1016/j.geomorph.2005.07.025>
- Premathilake, R., 2006. Relationship of environmental changes in central Sri Lanka to possible prehistoric land-use and climate changes. *Palaeogeography, Palaeoclimatology, Palaeoecology* 240, 468–496. <https://doi.org/10.1016/j.palaeo.2006.03.001>
- Prichard, S.J., Gedalof, Z., Oswald, W.W., Peterson, D.L., 2009. Holocene fire and vegetation dynamics in a montane forest, North Cascade Range, Washington, USA. *Quaternary Research* 72, 57–67. <https://doi.org/10.1016/j.yqres.2009.03.008>
- Primeau, G., Garneau, M., n.d. Unpublished data.
- Primeau, G., Garneau, M., 2021. Carbon accumulation in peatlands along a boreal to subarctic transect in eastern Canada. *The Holocene* 31, 858–869. <https://doi.org/10.1177/0959683620988031>
- Pulido, M.G., 2006. Conséquences de L’anthropisation sur la Dynamique Postglaciaire de la Végétation dans le sud du Massif Central, France (PhD thesis). Université d’Aix-Marseille, Marseille, France.
- Punning, J.-M., Koff, T., Kadastik, E., Mikomägi, A., 2005. Holocene lake level fluctuations recorded in the sediment composition of Lake Juusa, southeastern Estonia. *Journal of Paleolimnology* 34, 377–390. <https://doi.org/10.1007/s10933-005-6751-0>
- Radclyffe, E., 1993. Fire and People in Jervis Bay: Toward a Fire History in an Occupied Landscape (BSc (Hons) thesis). Department of Geography, The Australian National University, Canberra, Australia.
- Raine, J.I., 1974. Pollen Sedimentation in Relation to Quaternary Vegetation History of the Snowy Mountains of New South Wales (PhD thesis). Australian National University, Canberra.
- Rainville, R.A., Gajewski, K., 2013. Holocene environmental history of the Aishihik Region, Yukon, Canada. *Canadian Journal of Earth Sciences* 50, 397–405. <https://doi.org/10.1139/cjes-2012-0103>
- Ramos-Román, M.J., Jiménez-Moreno, G., Anderson, R.S., García-Alix, A., Toney, J.L., Jiménez-Espejo, F.J., Carrión, J.S., 2016. Centennial-scale vegetation and North Atlantic Oscillation changes during the

- late Holocene in the southern Iberia. *Quaternary Science Reviews* 143, 84–95.  
<https://doi.org/10.1016/j.quascirev.2016.05.007>
- Rasmussen, P., Bradshaw, E.G., 2005. Mid-to late-Holocene land-use change and lake development at Dallund So, Denmark: study aims, natural and cultural setting, chronology and soil erosion history. *The Holocene* 15, 1105–1115. <https://doi.org/10.1191/0959683605hl883rp>
- Rayle, C.M., Franklin, S.B., Lu, Z., 2015. Fire occurrence in relation to bamboo dominance in the Qinling Mountains of China: Evidence from phytolith and charcoal records in Holocene sediments. *Science China Earth Sciences* 58, 1182–1190. <https://doi.org/10.1007/s11430-015-5060-3>
- Reddad, H., Etabaai, I., Rhoujjati, A., Taieb, M., Thevenon, F., Damnati, B., 2013. Fire activity in North West Africa during the last 30,000 cal years BP inferred from a charcoal record from Lake Ifrah (Middle Atlas–Morocco): climatic implications. *Journal of African Earth Sciences* 84, 47–53.  
<https://doi.org/10.1016/j.jafrearsci.2013.03.007>
- Reid, M.A., Sayer, C.D., Kershaw, A.P., Heijnis, H., 2006. Palaeolimnological evidence for submerged plant loss in a floodplain lake associated with accelerated catchment soil erosion (Murray River, Australia). *Journal of Paleolimnology* 38, 191–208. <https://doi.org/10.1007/s10933-006-9067-9>
- Remy, C.C., Fouquemberg, C., Asselin, H., Andrieux, B., Magnan, G., Brossier, B., Grondin, P., Bergeron, Y., Talon, B., Girardin, M.P., Blarquez, O., Bajolle, L., Ali, A.A., 2018. Guidelines for the use and interpretation of palaeofire reconstructions based on various archives and proxies. *Quaternary Science Reviews* 193, 312–322. <https://doi.org/10.1016/j.quascirev.2018.06.010>
- Remy, C.C., Lavoie, M., Girardin, M.P., Hély, C., Bergeron, Y., Grondin, P., Oris, F., Asselin, H., Ali, A.A., 2017. Wildfire size alters long-term vegetation trajectories in boreal forests of eastern North America. *Journal of Biogeography* 44, 1268–1279. <https://doi.org/10.1111/jbi.12921>
- Revelles, J., Cho, S., Iriarte, E., Burjachs, F., van Geel, B., Palomo, A., Piqué, R., Peña-Chocarro, L., Terradas, X., 2015. Mid-Holocene vegetation history and Neolithic land-use in the Lake Banyoles area (Girona, Spain). *Palaeogeography, Palaeoclimatology, Palaeoecology* 435, 70–85.  
<https://doi.org/10.1016/j.palaeo.2015.06.002>
- Richard, P.J.H., n.d. Unpublished data.
- Richard, P.J.H., 1980. Histoire postglaciaire de la végétation au sud du lac Abitibi, Ontario et Québec. *Géographie physique et Quaternaire* 34, 77. <https://doi.org/10.7202/1000385ar>
- Richard, P.J.H., 1977. Histoire Post-Wisconsinienne de la Végétation du Québec Méridional par L’analyse Pollinique. Service de la recherche, Direction générale des forêts, Ministère des Terres et Forêts.
- Richard, P.J.H., Larouche, A., Bouchard, M.A., 1982. Âge de la déglaciation finale et histoire postglaciaire de la végétation dans la partie centrale du Nouveau-Québec. *Géographie physique et Quaternaire* 36, 63. <https://doi.org/10.7202/032470ar>
- Richard, P.J.H., Larouche, A.C., 1994. Histoire postglaciaire de la végétation et du climat dans la région de Rimouski, Québec, in: Chapdelaine, C. (Ed.), *11 y a 8000 ans Q Rimouski: Paleoeologie et Archeologic d’un site de la Culture Piano*. Recherches Amériendiennes au Québec, Coll. Paléo-Québec, pp. 49–89.
- Richard, P.J.H., Larouche, A., Lortie, G., 1992. Paléophytogéographie et paléoclimats postglaciaires dans l’ouest du Bas-Saint-Laurent, Québec. *Géographie physique et Quaternaire* 46, 151–172.  
<https://doi.org/10.7202/032900ar>
- Richoz, I., 1998. Etude paléoécologique du lac de Seedorf (Fribourg, Suisse). Histoire de la végétaion et du Mlieu Durant l’Holocène: le rôle de L’homme et du Climat (Thèse de doctorat). Université de Lausanne, Lausanne, Switzerland.
- Richoz, I., Gaillard, M.-J., Magny, M., 1994. The influence of human activities and climate on the development of vegetation at Seedorf, southern Swiss Plateau, during the Holocene: a case study. *Dissertationes Botanicae* 243, 423–445.



- Riera-Mora, S., Esteban-Amat, A., 1994. Vegetation history and human activity during the last 6000 years on the central Catalan coast (northeastern Iberian Peninsula). *Vegetation History and Archaeobotany* 3, 7–23. <https://doi.org/10.1007/bf00208885>
- Rimantienė, R., 1992. The Neolithic of the eastern Baltic. *Journal of World Prehistory* 6, 97–143. <https://doi.org/10.1007/bf00997586>
- Rius, D., Vanni re, B., Galop, D., 2009. Fire frequency and landscape management in the northwestern Pyrenean piedmont, France, since the early Neolithic (8000 cal. BP). *The Holocene* 19, 847–859. <https://doi.org/10.1177/0959683609105299>
- Robbie, A., 1998. The History of the Vegetation from the Palynology of Mountain Lagoon, Blue Mountains, New South Wales (BSc thesis). University of New South Wales, Sydney, Australia.
- Robertson, M., 1986. Fire Regimes and Vegetation Dynamics: a Case Study Examining the Potential of Fine Resolution Palaeoecological Techniques (BSc (Hons) thesis). Department of Geography; Environmental Science, Monash University, Melbourne, Australia.
- Robinson, G.S., Burney, L.P., Burney, D.A., 2005. Landscape paleoecology and megafaunal extinction in southeastern New York State. *Ecological Monographs* 75, 295–315. <https://doi.org/10.1890/03-4064>
- Robinson, K.D., 2007. A Holistic Paleolimnological Study of North-Central Mongolian Lakes (PhD thesis). University of Pittsburgh, Pittsburgh, Pennsylvania, USA.
- Robitaille, M., Garneau, M., van Bellen, S., Sanderson, N.K., 2021. Long-term and recent ecohydrological dynamics of patterned peatlands in north-central Quebec (Canada). *The Holocene* 31, 844–857. <https://doi.org/10.1177/0959683620988051>
- Robles-L pez, S., Luelmo-Lautenschlaeger, R., P rez-D az, S., Abel-Schaad, D., Alba-S nchez, F., Ruiz-Alonso, M., L pez-S ez, J.A., 2017. Vulnerabilidad y resiliencia de los pinares de alta monta a de la Sierra de Gredos ( vila, Sistema Central): dos mil a os de din mica socioecol gica. *Cuaternario y Geomorfolog a* 31, 51. <https://doi.org/10.17735/cyg.v31i3-4.55594>
- Robles-L pez, S., Mart n-Consuegra, A.F., P rez-D az, S., Alba-S nchez, F., Broothaerts, N., Abel-Schaad, D., L pez-S ez, J.A., 2018. The dialectic between deciduous and coniferous forests in central Iberia: a palaeoenvironmental perspective during the late Holocene in the Gredos range. *Quaternary International* 470, 148–165. <https://doi.org/10.1016/j.quaint.2017.05.012>
- Rodr guez, F., Behling, H., 2012. Late Quaternary vegetation, climate and fire dynamics, and evidence of early to mid-Holocene *Polylepis* forests in the Jimbura region of the southernmost Ecuadorian Andes. *Palaeogeography, Palaeoclimatology, Palaeoecology* 350-352, 247–257. <https://doi.org/10.1016/j.palaeo.2012.07.004>
- Rodr guez, F., Behling, H., 2010. Late Holocene vegetation, fire, climate and upper forest line dynamics in the Podocarpus National Park, southeastern Ecuador. *Vegetation History and Archaeobotany* 20, 1–14. <https://doi.org/10.1007/s00334-010-0252-4>
- Rodr guez-Zorro, P.A., da Costa, M.L., Behling, H., 2017. Mid-Holocene vegetation dynamics with an early expansion of *Mauritia flexuosa* palm trees inferred from the Serra do Tepequ m in the savannas of Roraima State in Amazonia, northwestern Brazil. *Vegetation History and Archaeobotany* 26, 455–468. <https://doi.org/10.1007/s00334-017-0605-3>
- Rodr guez-Zorro, P.A., Ledru, M.-P., Bard, E., Aquino-Alfonso, O., Camejo, A., Daniau, A.-L., Favier, C., Garcia, M., Mineli, T.D., Rostek, F., Ricardi-Branco, F., 2020. Shut down of the South American summer monsoon during the penultimate glacial. *Scientific Reports* 10, 1–11. <https://doi.org/10.1038/s41598-020-62888-x>
- Rodr guez-Zorro, P.A., Turcq, B., Cordeiro, R.C., Moreira, L.S., Costa, R.L., McMichael, C.H., Behling, H., 2017. Forest stability during the early and late Holocene in the igap  floodplains of the Rio Negro, northwestern Brazil. *Quaternary Research* 89, 75–89. <https://doi.org/10.1017/qua.2017.99>
- Rogers, J., Hope, G.S., 2006. The Holocene infill of Nursery Swamp, a large sedgeland in the Australian Capital Territory. Unpublished report to Environment ACT.

- Roos-Barraclough, F., van der Knaap, W.O., van Leeuwen, J.F.N., Shotyk, W., 2004. A Late-glacial and Holocene record of climatic change from a Swiss peat humification profile. *The Holocene* 14, 7–19. <https://doi.org/10.1191/0959683604hl685rp>
- Rowe, C., 2007. A palynological investigation of Holocene vegetation change in Torres Strait, seasonal tropics of northern Australia. *Palaeogeography, Palaeoclimatology, Palaeoecology* 251, 83–103. <https://doi.org/10.1016/j.palaeo.2007.02.019>
- Rowe, C., 2006a. A Holocene History of Vegetation Change in the Western Torres Strait Region, Queensland, Australia (PhD thesis). School of Geography; Environmental Science, Monash University, Melbourne, Australia.
- Rowe, C., 2006b. Landscapes in western Torres Strait history, in: David, B., Barker, B., McNiven, I. (Eds.), *The Social Archaeology of Australian Indigenous Societies*. Aboriginal Studies Press, Canberra, pp. 270–287.
- Rowe, J.S., Spittlehouse, D., Johnson, E., Jasieniuk, M., 1975. Fire studies in the Upper Mackenzie Valley and adjacent Precambrian uplands. Department of Indian and Northern Affairs; INA Publication QS-8045-000-EE-A1, Ottawa, Ontario, Canada.
- Rösch, M., 2013. Change of land use during the last two millennia as indicated in the pollen record of a profundal core from Mindelsee, Lake Constance Region, Southwest Germany. *Von Sylt bis Kastanas: Festschrift für Helmut Johannes Kroll*. *Offa* 69, 335–370.
- Rösch, M., 2012. Vegetation und Waldnutzung im Nordschwarzwald während sechs Jahrtausenden anhand von Profundalkernen aus dem Herrenwieser See. *Mitt. Ver. für Forstl. Standortkunde und Forstpflanzenzüchtung* 47, 43–64. <https://doi.org/10013/epic.44366.d024>
- Rösch, M., 2009. Zur vorgeschichtlichen Besiedlung und Landnutzung im nördlichen Schwarzwald aufgrund vegetationsgeschichtlicher Untersuchungen in zwei Karseen - Prehistoric settlement and land use history of the Northern Black Forest as indicated by pollenanalytical investigations in two cirque lakes. *Mitt. Ver. für Forstl. Standortkunde und Forstpflanzenzüchtung* 46, 15–24.
- Rösch, M., 2007. Botanical evidence for prehistoric and medieval land use in the Black Forest, in: *Medieval Rural Settlement in Marginal Landscapes: Peuplement rural dans les territoires marginaux au Moyen Âge. Mittelalterliche Siedlung in ländlichen Randgebieten*. Brepols Publishers, Cardiff, Wales, UK, pp. 335–343. <https://doi.org/10.1484/M.RURALIA-EB.3.1181>
- Rösch, M., 2005. Zur Vegetationsgeschichte des südlichen Kraichgau – Botanische Untersuchungen bei Grossvillars, Gemeinde Oberderdingen, Landkreis Karlsruhe. *Fundberichte aus Baden-Württemberg* 28, 839–870.
- Rösch, M., 2000. Long-term human impact as registered in an upland pollen profile from the southern Black Forest, south-western Germany. *Vegetation History and Archaeobotany* 9, 205–218. <https://doi.org/10.1007/BF01294635>
- Rösch, M., 1997. Holocene sediment accumulation in the shallow water zone of Lower Lake Constance. *Archiv für Hydrobiologie. Supplementband. Monographische Beiträge* 107, 541–562.
- Rösch, M., 1993. Prehistoric land use as recorded in a lake-shore core at Lake Constance. *Vegetation History and Archaeobotany* 2, 213–232. <https://doi.org/10.1007/BF00198163>
- Rösch, M., 1992. Human impact as registered in the pollen record: some results from the western Lake Constance region, southern Germany. *Vegetation History and Archaeobotany* 1, 101–109. <https://doi.org/10.1007/bf00206090>
- Rösch, M., 1986. Zwei Moore im westlichen Bodenseegebiet als Zeugen prähistorischer Landschaftsveränderungen. *Telma* 16, 83–111.
- Rösch, M., Fischer, E., 2000. A radiocarbon dated Holocene pollen profile from the Banat mountains (Southwestern Carpathians, Romania). *Flora* 195, 277–286. [https://doi.org/10.1016/S0367-2530\(17\)30981-7](https://doi.org/10.1016/S0367-2530(17)30981-7)

- Rösch, M., Kleinmann, A., Lechterbeck, J., Wick, L., 2014. Botanical off-site and on-site data as indicators of different land use systems: a discussion with examples from Southwest Germany. *Vegetation history and archaeobotany* 23, 121–133. <https://doi.org/10.1007/s00334-014-0437-3>
- Rösch, M., Lechterbeck, J., 2016. Seven millennia of human impact as reflected in a high resolution pollen profile from the profundal sediments of Litzelsee, Lake Constance region, Germany. *Vegetation History and Archaeobotany* 25, 339–358. <https://doi.org/10.1007/s00334-015-0552-9>
- Rösch, M., Marinova, E., 2020. 51. Zeller See. Grana 1–3. <https://doi.org/10.1080/00173134.2020.1821765>
- Rösch, M., Tserendorj, G., 2011a. Der Nordschwarzwald—früher besiedelt als gedacht? Pollenprofile belegen ausgedehnte vor-geschichtliche Besiedlung und Landnutzung. *Denkmalpflege in Baden-Württemberg* 40, 66–73.
- Rösch, M., Tserendorj, G., 2011b. Florengeschichtliche Beobachtungen im Nordschwarzwald (Südwestdeutschland). *Hercynia N.F.* 44, 53–71.
- Rösch, M., Volk, H., Wieland, G., 2005. Frühe Waldnutzung und das Alter des Naturwaldes im Schwarzwald. *AFZ (Allgemeine Forstzeitschrift)*.-Der Wald 12, 636–638.
- Rucina, S.M., Muiruri, V.M., Kinyanjui, R.N., McGuinness, K., Marchant, R., 2009. Late Quaternary vegetation and fire dynamics on Mount Kenya. *Palaeogeography, Palaeoclimatology, Palaeoecology* 283, 1–14. <https://doi.org/10.1016/j.palaeo.2009.08.008>
- Rue, D., Webster, D., Traverse, A., 2002. Late Holocene fire and agriculture in the Copan Valley, Honduras. *Ancient Mesoamerica* 13, 267–272. <https://doi.org/10.1017/S095653610213210X>
- Ruiz Pessenda, L.C., Gomes, B.M., Aravena, R., de Souza Ribeiro, A., Boulet, R., Marques Gouveia, S.E., 1998. The carbon isotope record in soils along a forest-cerrado ecosystem transect: implications for vegetation changes in the Rondonia state, southwestern Brazilian Amazon region. *The Holocene* 8, 599–603. <https://doi.org/10.1191/095968398673187182>
- Ruiz Pessenda, L.C., Marques Gouveia, S.E., Aravena, R., 2001. Radiocarbon dating of total soil organic matter and humin fraction and its comparison with <sup>14</sup>C ages of fossil charcoal. *Radiocarbon* 43, 595–601. <https://doi.org/10.1017/S0033822200041242>
- Ruiz Pessenda, L.C., Marques Gouveia, S.E., Aravena, R., Boulet, R., Valencia, E.P.E., 2004. Holocene fire and vegetation changes in southeastern Brazil as deduced from fossil charcoal and soil carbon isotopes. *Quaternary International* 114, 35–43. [https://doi.org/10.1016/S1040-6182\(03\)00040-5](https://doi.org/10.1016/S1040-6182(03)00040-5)
- Rypins, S., Reneau, S.L., Byrne, R., Montgomery, D.R., 1989. Palynologic and geomorphic evidence for environmental change during the Pleistocene-Holocene transition at Point Reyes Peninsula, central coastal California. *Quaternary Research* 32, 72–87. [https://doi.org/10.1016/0033-5894\(89\)90033-1](https://doi.org/10.1016/0033-5894(89)90033-1)
- Saarse, L., Poska, A., Kaup, E., Heinsalu, A., 1998. Holocene environmental events in the Viitna area, North Estonia, in: *Proceedings of the Estonian Academy of Sciences, Geology*. Estonian Academy Publishers, pp. 31–44.
- Sadori, L., Zanchetta, G., Giardini, M., 2008. Last Glacial to Holocene palaeoenvironmental evolution at Lago di Pergusa (Sicily, Southern Italy) as inferred by pollen, microcharcoal, and stable isotopes. *Quaternary International* 181, 4–14. <https://doi.org/10.1016/j.quaint.2007.02.024>
- Sae-Lim, J., Russell, J.M., Vachula, R.S., Holmes, R.M., Mann, P.J., Schade, J.D., Natali, S.M., 2019. Temperature-controlled tundra fire severity and frequency during the last millennium in the Yukon-Kuskokwim Delta, Alaska. *The Holocene* 29, 1223–1233.
- Salgado-Labouriau, M.L., Casetti, V., Ferraz-Vicentini, K.R., Martin, L., Soubiès, F., Suguio, K., Turcq, B., 1997. Late Quaternary vegetational and climatic changes in cerrado and palm swamp from Central Brazil. *Palaeogeography, Palaeoclimatology, Palaeoecology* 128, 215–226. [https://doi.org/10.1016/S0031-0182\(96\)00018-1](https://doi.org/10.1016/S0031-0182(96)00018-1)
- Salonen, J.S., Seppä, H., Väliranta, M., Jones, V.J., Self, A., Heikkilä, M., Kultti, S., Yang, H., 2011. The Holocene thermal maximum and late-Holocene cooling in the tundra of NE European Russia. *Quaternary Research* 75, 501–511. <https://doi.org/10.1016/j.yqres.2011.01.007>

- Salzmann, U., Hoelzmann, P., Morczinek, I., 2002. Late Quaternary climate and vegetation of the Sudanian zone of northeast Nigeria. *Quaternary Research* 58, 73–83. <https://doi.org/10.1006/qres.2002.2356>
- Sarmaja-Korjonen, K., 1998. Latitudinal differences in the influx of microscopic charred particles to lake sediments in Finland. *The Holocene* 8, 589–597. <https://doi.org/10.1191/095968398666296639>
- Sasaki, N., Takahara, H., n.d. Unpublished data.
- Sasaki, N., Takahara, H., 2012. Fire and human impact on the vegetation of the western Tamba Highlands, Kyoto, Japan during the late Holocene. *Quaternary International* 254, 3–11. <https://doi.org/10.1016/j.quaint.2010.12.003>
- Sasaki, N., Takahara, H., 2011. Late Holocene human impact on the vegetation around Mizorogaike Pond in northern Kyoto Basin, Japan: a comparison of pollen and charcoal records with archaeological and historical data. *Journal of Archaeological Science* 38, 1199–1208. <https://doi.org/10.1016/j.jas.2010.12.013>
- Sánchez-Goñi, M.F., Hannon, G.E., 1999. High-altitude vegetational pattern on the Iberian Mountain Chain (north-central Spain) during the Holocene. *The Holocene* 9, 39–57. <https://doi.org/10.1191/095968399671230625>
- Scharf, E.A., 2010. A statistical evaluation of the relative influences of climate, vegetation, and prehistoric human population on the charcoal record of Five Lakes, Washington (USA). *Quaternary International* 215, 74–86. <https://doi.org/10.1016/j.quaint.2009.09.021>
- Schneider, H., Höfer, D., Trog, C., Busch, S., Schneider, M., Baade, J., Daut, G., Mäusbacher, R., 2010. Holocene estuary development in the Algarve Region (Southern Portugal) – A reconstruction of sedimentological and ecological evolution. *Quaternary International* 221, 141–158. <https://doi.org/10.1016/j.quaint.2009.10.004>
- Schneider, H., Höfer, D., Trog, C., Mäusbacher, R., 2016. Holocene landscape development along the Portuguese Algarve coast – A high resolution palynological approach. *Quaternary International* 407, 47–63. <https://doi.org/10.1016/j.quaint.2016.02.039>
- Scott, L., n.d. Unpublished data.
- Scott, L., 2002. Microscopic charcoal in sediments: Quaternary fire history of the grassland and savanna regions in South Africa. *Journal of Quaternary Science* 17, 77–86. <https://doi.org/10.1002/jqs.641>
- Scott, L., Holmgren, K., Partridge, T.C., 2008. Reconciliation of vegetation and climatic interpretations of pollen profiles and other regional records from the last 60 thousand years in the savanna biome of southern Africa. *Palaeogeography, Palaeoclimatology, Palaeoecology* 257, 198–206. <https://doi.org/10.1016/j.palaeo.2007.10.018>
- Scott, L., Holmgren, K., Talma, A.S., Woodborne, S., Vogel, J.C., 2003. Age interpretation of the Wonderkrater spring sediments and vegetation change in the Savanna Biome, Limpopo province, South Africa. *South African Journal of Science* 99, 484–488.
- Scott, L., Vogel, J.C., 1983. Late Quaternary pollen profile from the Transvaal highveld South Africa. *South African Journal of Science* 79, 266–272.
- Scott, L., Woodborne, S., 2007. Pollen analysis and dating of Late Quaternary faecal deposits (hyraceum) in the Cederberg, Western Cape, South Africa. *Review of Palaeobotany and Palynology* 144, 123–134. <https://doi.org/10.1016/j.revpalbo.2006.07.004>
- Segerström, U., 1997. Long-term dynamics of vegetation and disturbance of a southern boreal spruce swamp forest. *Journal of Vegetation Science* 8, 295–306. <https://doi.org/10.2307/3237359>
- Senici, D., Chen, H.Y.H., Bergeron, Y., Ali, A.A., 2015. The effects of forest fuel connectivity on spatiotemporal dynamics of Holocene fire regimes in the central boreal forest of North America. *Journal of Quaternary Science* 30, 365–375. <https://doi.org/10.1002/jqs.2790>
- Senici, D., Lucas, A., Chen, H.Y.H., Bergeron, Y., Larouche, A., Brossier, B., Blarquez, O., Ali, A.A., 2013. Multi-millennial fire frequency and tree abundance differ between xeric and mesic boreal forests in central Canada. *Journal of Ecology* 101, 356–367. <https://doi.org/10.1111/1365-2745.12047>



- Shafer, D.S., 1989. The Timing of Late Quaternary Monsoon Precipitation Maxima in the Southwest United States (PhD thesis). The University of Arizona, Tucson, Arizona.
- Shaw, H., Tipping, R., 2006. Recent pine woodland dynamics in east Glen Affric, northern Scotland, from highly resolved palaeoecological analyses. *Forestry* 79, 331–340. <https://doi.org/10.1093/forestry/cpl020>
- Shi, N., Dupont, L.M., Beug, H.-J., Schneider, R., 1998. Vegetation and climate changes during the last 21 000 years in S.W. Africa based on a marine pollen record. *Vegetation History and Archaeobotany* 7, 127–140. <https://doi.org/10.1007/BF01374001>
- Shichi, K., Takahara, H., Krivonogov, S.K., Bezrukova, E.V., Kashiwaya, K., Takehara, A., Nakamura, T., 2009. Late Pleistocene and Holocene vegetation and climate records from Lake Kotokel, central Baikal region. *Quaternary International* 205, 98–110. <https://doi.org/10.1016/j.quaint.2009.02.005>
- Shu, J., Wang, W., Jiang, L., Takahara, H., 2010. Early Neolithic vegetation history, fire regime and human activity at Kuahuqiao, Lower Yangtze River, East China: new and improved insight. *Quaternary International* 227, 10–21. <https://doi.org/10.1016/j.quaint.2010.04.010>
- Shuman, B., Bravo, J., Kaye, J., Lynch, J.A., Newby, P., Webb III, T., 2001. Late Quaternary water-level variations and vegetation history at Crooked Pond, southeastern Massachusetts. *Quaternary Research* 56, 401–410. <https://doi.org/10.1006/qres.2001.2273>
- Shuman, B., Henderson, A., Mechenich, M.F., Stefanova, V., 2006. Late-Holocene moisture and fire history in the Park Range, northern Colorado, in: *Proceedings of the 2006 American Quaternary Association Bi-annual Meeting, Bozeman Program*.
- Shumilovskikh, L.S., Schlütz, F., Achterberg, I., Bauerochse, A., Leuschner, H.H., 2015. Non-pollen palynomorphs from mid-Holocene peat of the raised bog Borsteler Moor (Lower Saxony, Germany). *Studia Quaternaria* 32, 5–18. <https://doi.org/10.1515/squa-2015-0001>
- Shuyun, W., Duowen, M., Guoping, S., Chenxi, S., Minglin, L., Yunfei, Z., Longjiang, M., 2010. Environmental context of ancient human activity in Tianluoshan Site, Yuyao City, Zhejiang Province: fossil evidence of phytolith and diatom. *Quaternary Sciences* 30, 326–334. <https://doi.org/10.3969/j.issn.1001-7410.2010.02.09>
- Sillasoo, Mauquoy, D., Blundell, A., Charman, D., Blaauw, M., Daniell, J.R.G., Toms, P., Newberry, J., Chambers, F.M., Karofeld, E., 2007. Peat multi-proxy data from Männikjärve bog as indicators of late Holocene climate changes in Estonia. *Boreas* 36, 20–37. <https://doi.org/10.1111/j.1502-3885.2007.tb01177.x>
- Sillasoo, Väiliranta, M., Tuittila, E.-S., 2011. Fire history and vegetation recovery in two raised bogs at the Baltic Sea. *Journal of Vegetation Science* 22, 1084–1093. <https://doi.org/10.1111/j.1654-1103.2011.01307.x>
- Silva Sánchez, N., Martínez Cortizas, A., Abel-Schaad, D., López-Sáez, J.A., Mighall, T.M., 2016. Influence of climate change and human activities on the organic and inorganic composition of peat during the “Little Ice Age” (El Payo mire, W Spain). *The Holocene* 26, 1290–1303. <https://doi.org/10.1177/0959683616638439>
- Simard, I., Morin, H., Lavoie, C., 2006. A millennial-scale reconstruction of spruce budworm abundance in Saguenay, Québec, Canada. *The Holocene* 16, 31–37. <https://doi.org/10.1191/0959683606h1904rp>
- Singh, G., Geissler, E.A., 1985. Late Cainozoic history of vegetation, fire, lake levels and climate at Lake George, New South Wales, Australia. *Philosophical Transactions of the Royal Society B: Biological Sciences* 311, 379–447. <https://doi.org/10.1098/rstb.1985.0156>
- Singh, G., Kershaw, A.P., Clark, R., 1981. Quaternary vegetation and fire history in Australia, in: Gill, A.M., Groves, R.A., Noble, I.R. (Eds.), *Fire and the Australian Biota*. Australian Academy of Science, Canberra, pp. 23–54.
- Singh, G., Luly, J.G., 1991. Changes in vegetation and seasonal climate since the last full glacial at Lake Frome, south Australia. *Palaeogeography, Palaeoclimatology, Palaeoecology* 84, 75–86. [https://doi.org/10.1016/0031-0182\(91\)90036-Q](https://doi.org/10.1016/0031-0182(91)90036-Q)

- Sjögren, P., Lamentowicz, M., 2008. Human and climatic impact on mires: a case study of Les Amburnex mire, Swiss Jura Mountains. *Vegetation History and Archaeobotany* 17, 185–197. <https://doi.org/10.1007/s00334-007-0095-9>
- Smeulders, D.M., 1999. A Late Holocene Environmental Reconstruction Using Lake Sediments From Hopwood's Lagoon, NSW. (BSc (Hons) thesis). School of Geography, University of New South Wales, Sydney, Australia.
- Smith, S.J., Anderson, R.S., 1992. Late Wisconsin paleoecologic record from Swamp Lake, Yosemite National Park, California. *Quaternary Research* 38, 91–102. [https://doi.org/10.1016/0033-5894\(92\)90032-e](https://doi.org/10.1016/0033-5894(92)90032-e)
- Speranza, A., Hanke, J., van Geel, B., Fanta, J., 2000. Late-Holocene human impact and peat development in the Černá Hora bog, Krkonoše Mountains, Czech Republic. *The Holocene* 10, 575–585. <https://doi.org/10.1191/095968300668946885>
- Stahli, M., Finsinger, W., Tinner, W., Allgower, B., 2006. Wildfire history and fire ecology of the Swiss National Park (Central Alps): new evidence from charcoal, pollen and plant macrofossils. *The Holocene* 16, 805–817. <https://doi.org/10.1191/0959683606hol967rp>
- Stančikaitė, M., Baltrūnas, V., Šinkūnas, P., Kisielienė, D., Ostrauskas, T., 2006. Human response to the Holocene environmental changes in the Biržulis Lake region, NW Lithuania. *Quaternary International* 150, 113–129. <https://doi.org/10.1016/j.quaint.2006.01.010>
- Stančikaitė, M., Gedminienė, L., Edvardsson, J., Stoffel, M., Corona, C., Gryguc, G., Uogintas, D., Zinkutė, R., Skuratovič, Taraškevičius, R., 2019. Holocene vegetation and hydroclimatic dynamics in SE Lithuania – implications from a multi-proxy study of the Čepkeliai bog. *Quaternary International* 501, 219–239. <https://doi.org/10.1016/j.quaint.2017.08.039>
- Stančikaitė, M., Kisielienė, D., Moe, D., Vaikutienė, G., 2009. Lateglacial and early Holocene environmental changes in northeastern Lithuania. *Quaternary International* 207, 80–92. <https://doi.org/10.1016/j.quaint.2008.10.009>
- Stančikaitė, M., Kisielienė, D., Strimaitienė, A., 2004. Vegetation response to the climatic and human impact changes during the Late Glacial and Holocene: case study of the marginal area of Baltija Upland, NE Lithuania. *Baltica* 17, 17–33.
- Stančikaitė, M., Milkevičius, M., Kisielienė, D., 2003. Palaeoenvironmental changes in the environs of Žadeikiai Bog, NW Lithuania, during the Late Glacial and the Holocene according to palaeobotanical and <sup>14</sup>C data. *Geologija Vilnius* 43, 47–60.
- Stančikaitė, M., Simniškytė, A., Skuratovič, Gedminienė, L., Kazakauskas, V., Uogintas, D., 2019. Reconstruction of the mid-to Late- Holocene history of vegetation and land-use in Petrešiūnai, north-east Lithuania: implications from palaeobotanical and archaeological data. *Quaternary International* 516, 5–20. <https://doi.org/10.1016/j.quaint.2018.09.029>
- Stančikaitė, M., Šeirienė, V., Kisielienė, D., Martma, T., Gryguc, G., Zinkutė, R., Mažeika, J., Šinkūnas, P., 2015. Lateglacial and early Holocene environmental dynamics in northern Lithuania: a multi-proxy record from Ginkūnai Lake. *Quaternary International* 357, 44–57. <https://doi.org/10.1016/j.quaint.2014.08.036>
- Stefanova, I., van Leeuwen, J.F.N., van der Knaap, W.O., 2008. 2. Loch Laxford (north-west Scotland, UK). *Grana* 47, 78–79. <https://doi.org/10.1080/00173130801987740>
- Steinberga, D., Stivrins, N., 2021. Fire frequency during the Holocene in central Latvia, northeastern Europe. *Estonian Journal of Earth Sciences* 70, 127–139. <https://doi.org/10.3176/earth.2021.09>
- Stevenson, A.C., 2000. The Holocene forest history of the Montes Universales, Teruel, Spain. *The Holocene* 10, 603–610. <https://doi.org/10.1191/095968300670543500>
- Stevenson, J., n.d. Unpublished data.
- Stevenson, J., 2004. A late-Holocene record of human impact from the southwest coast of New Caledonia. *The Holocene* 14, 888–898. <https://doi.org/10.1191/0959-683604hl755rp>

- Stevenson, J., 1998. Late Quaternary Environmental Change and the Impact of Melanesian Colonisation in New Caledonia (PhD thesis). Department of Geography, University of New South Wales, Sydney, Australia.
- Stevenson, J., Gillespie, R., Hope, G.S., Jacobsen, G., Fallon, S., Levchenko, V., 2010. The archaic and puzzling record of Lake Xere Wapo, New Caledonia, in: Stevenson, J., Haberle, S.G., Prebble, M. (Eds.), *Altered Ecologies: Fire, Climate and Human Influence on Terrestrial Landscapes*, Terra Australis 32. ANU Press, pp. 381–393.
- Stevenson, J., Hope, G.S., 2005. A comparison of late Quaternary forest changes in New Caledonia and northeastern Australia. *Quaternary Research* 64, 372–383.  
<https://doi.org/10.1016/j.yqres.2005.08.011>
- Stevenson, J., Siringan, F., Finn, J., Madulid, D., Heijnis, H., 2009. Paoay Lake, northern Luzon, the Philippines: a record of Holocene environmental change. *Global Change Biology* 16, 1672–1688.  
<https://doi.org/10.1111/j.1365-2486.2009.02039.x>
- Stivrins, N., n.d. Unpublished data.
- Stivrins, N., Aakala, T., Ilvonen, L., Pasanen, L., Kuuluvainen, T., Vasander, H., Gałka, M., Disbrey, H.R., Liepins, J., Holmström, L., Seppä, H., 2019. Integrating fire-scar, charcoal and fungal spore data to study fire events in the boreal forest of northern Europe. *The Holocene* 29, 1480–1490.  
<https://doi.org/10.1177/0959683619854524>
- Stivrins, N., Brown, A., Reitalu, T., Veski, S., Heinsalu, A., Banerjea, R.Y., Elmi, K., 2014. Landscape change in central Latvia since the Iron Age: multi-proxy analysis of the vegetation impact of conflict, colonization and economic expansion during the last 2,000 years. *Vegetation History and Archaeobotany* 24, 377–391. <https://doi.org/10.1007/s00334-014-0502-y>
- Stivrins, N., Brown, A., Veski, S., Ratniece, V., Heinsalu, A., Austin, J., Liiv, M., Ceriņa, A., 2015. Palaeoenvironmental evidence for the impact of the crusades on the local and regional environment of medieval (13th–16th century) northern Latvia, eastern Baltic. *The Holocene* 26, 61–69. <https://doi.org/10.1177/0959683615596821>
- Stivrins, N., Buchan, M.S., Disbrey, H.R., Kuosmanen, N., Latałowa, M., Lempinen, J., Muukkonen, P., Słowiński, M., Veski, S., Seppä, H., 2017. Widespread, episodic decline of alder (*Alnus*) during the medieval period in the boreal forest of Europe. *Journal of Quaternary Science* 32, 903–907.  
<https://doi.org/10.1002/jqs.2984>
- Stivrins, N., Kołaczek, P., Reitalu, T., Seppä, H., Veski, S., 2015. Phytoplankton response to the environmental and climatic variability in a temperate lake over the last 14,500 years in eastern Latvia. *Journal of Paleolimnology* 54, 103–119. <https://doi.org/10.1007/s10933-015-9840-8>
- Stivrins, N., Ozola, I., Gałka, M., Kuske, E., Alliksaar, T., Andersen, T.J., Lamentowicz, M., Wulf, S., Reitalu, T., 2017. Drivers of peat accumulation rate in a raised bog: impact of drainage, climate, and local vegetation composition. *Mires and Peat* 19, 1–19. <https://doi.org/10.19189/MaP.2016.OMB.262>
- Stivrins, N., Wulf, S., Wastegård, S., Lind, E.M., Alliksaar, T., Gałka, M., Andersen, T.J., Heinsalu, A., Seppä, H., Veski, S., 2016. Detection of the Askja AD 1875 cryptotephra in Latvia, eastern Europe. *Journal of Quaternary Science* 31, 437–441. <https://doi.org/10.1002/jqs.2868>
- Sugimura, W.Y., Sprugel, D.G., Brubaker, L.B., Higuera, P.E., 2008. Millennial-scale changes in local vegetation and fire regimes on Mount Constitution, Orcas Island, Washington, USA, using small hollow sediments. *Canadian Journal of Forest Research* 38, 539–552. <https://doi.org/10.1139/x07-186>
- Sun, Q.F., Shen, C.M., Wang, M., Meng, H., Zhang, H., 2018. Pollen/charcoal record over the past 13,300 years from Fuxian Lake in the Yunnan-Guizhou Plateau. *Acta Palaeontologica Sinica* 249–259.
- Sun, X.J., Li, X., Chen, H.C., 2000. Evidence for natural fire and climate history since 37 ka BP in the northern part of the South China Sea. *Science in China Series D: Earth Sciences* 43, 487–493.  
<https://doi.org/10.1007/bf02875310>

- Svobodová, H., Reille, M., Goeury, C., 2001. Past vegetation dynamics of Vltavský luh, upper Vltava river valley in the Šumava mountains. Czech Republic. *Vegetation History and Archaeobotany* 10, 185–199. <https://doi.org/10.1007/pl00006930>
- Swain, A.M., 1978. Environmental changes during the past 2000 years in north-central Wisconsin: analysis of pollen, charcoal, and seeds from varved lake sediments. *Quaternary Research* 10, 55–68. [https://doi.org/10.1016/0033-5894\(78\)90013-3](https://doi.org/10.1016/0033-5894(78)90013-3)
- Swain, A.M., 1973. A history of fire and vegetation in northeastern Minnesota as recorded in lake sediments. *Quaternary Research* 3, 383–396. [https://doi.org/10.1016/0033-5894\(73\)90004-5](https://doi.org/10.1016/0033-5894(73)90004-5)
- Szabó, P., Kuneš, P., Svobodová-Svitavská, H., Švarcová, M.G., Křížová, L., Suchánková, S., Müllerová, J., Hédl, R., 2017. Using historical ecology to reassess the conservation status of coniferous forests in Central Europe. *Conservation Biology* 31, 150–160. <https://doi.org/10.1111/cobi.12763>
- Szal, M., Kupryjanowicz, M., Tylmann, W., Piotrowska, N., 2017. Was it “terra desolata”? Conquering and colonizing the medieval Prussian wilderness in the context of climate change. *The Holocene* 27, 465–480. <https://doi.org/10.1177/09596836166660167>
- Szal, M., Kupryjanowicz, M., Wyczółkowski, M., Tylmann, W., 2014. The Iron Age in the Mrągowo Lake District, Masuria, NE Poland: the Sałęt settlement microregion as an example of long-lasting human impact on vegetation. *Vegetation History and Archaeobotany* 23, 419–437. <https://doi.org/10.1007/s00334-014-0465-z>
- Szeicz, J.M., Haberle, S.G., Bennett, K.D., 2003. Dynamics of North Patagonian rainforests from fine-resolution pollen, charcoal and tree-ring analysis, Chonos Archipelago, Southern Chile. *Austral Ecology* 28, 413–422. <https://doi.org/10.1046/j.1442-9993.2003.01299.x>
- Szeicz, J.M., Zeeb, B.A., Bennett, K.D., Smol, J.P., 1998. High-resolution paleoecological analysis of recent disturbance in a southern Chilean *Nothofagus* forest. *Journal of Paleolimnology* 20, 235–252. <https://doi.org/10.1023/A:1007950905200>
- Święta-Musznicka, J., Badura, M., Pędziszewska, A., Latałowa, M., 2021. Environmental changes and plant use during the 5th–14th centuries in medieval Gdańsk, northern Poland. *Vegetation History and Archaeobotany* 30, 363–381. <https://doi.org/10.1007/s00334-020-00789-9>
- Takahara, H., Krivonogov, S., n.d. Unpublished data.
- Takemura, K., Hayashida, A., Okamura, M., Matsuoka, H., Ali, M., Kuniko, Y., Torii, M., 2000. Stratigraphy of multiple piston-core sediments for the last 30,000 years from Lake Biwa, Japan. *Journal of Paleolimnology* 23, 185–199. <https://doi.org/10.1023/A:1008079418715>
- Tan, Z., Han, Y., Cao, J., Huang, C.-C., Mao, L., Liu, Z., An, Z., 2018. The linkages with fires, vegetation composition and human activity in response to climate changes in the Chinese Loess Plateau during the Holocene. *Quaternary International* 488, 18–29. <https://doi.org/10.1016/j.quaint.2018.03.041>
- Tan, Z.-H., Huang, C.-C., Pang, J.-L., Zhang, Z.-P., 2010. Charcoal records of Holocene loess-soil sequences and its palaeoenvironmental significance in Weihe River Drainage. *Chinese Journal of Eco-Agriculture* 18, 25–30. <https://doi.org/10.3724/sp.j.1011.2010.00025>
- Tan, Z.H., Long, Y.X., Mao, L.J., Mo, D.W., Bin, L., Liu, Z., 2017. Records of the dark brown soil profile by charcoal and black carbon (char and soot) sedimentary archives from Dongting Basin since the Middle-late Last Glacial Period. *Journal of Capital Normal University (Natural Science Edition)* 38, 77–84.
- Tan, Z., Huang, C.-C., Pang, J., Zhou, Y., 2013. Wildfire history and climatic change in the semi-arid loess tableland in the middle reaches of the Yellow River of China during the Holocene: evidence from charcoal records. *The Holocene* 23, 1466–1476. <https://doi.org/10.1177/0959683613493936>
- Taylor, D., Marchant, R.A., Robertshaw, P., 1999. A sediment-based history of medium altitude forest in central Africa: a record from Kabata Swamp, Ndale volcanic field, Uganda. *Journal of Ecology* 87, 303–315. <https://doi.org/10.1046/j.1365-2745.1999.00347.x>



- Taylor, Z.P., 2005. Environmental History at Laguna Yaguarú, Bolivia: Evidence from Pollen, Stable Carbon Isotopes, and an Embedded Mineral Facies (MSc thesis). University of Tennessee, Knoxville, Tennessee, USA.
- Taylor, Z.P., Horn, S.P., Mora, C.I., Orvis, K.H., Cooper, L.W., 2010. A multi-proxy palaeoecological record of late-Holocene forest expansion in lowland Bolivia. *Palaeogeography, Palaeoclimatology, Palaeoecology* 293, 98–107. <https://doi.org/10.1016/j.palaeo.2010.05.004>
- Teed, R., Umbanhower Jr, C.E., Camill, P., 2009. Multiproxy lake sediment records at the northern and southern boundaries of the Aspen Parkland region of Manitoba, Canada. *The Holocene* 19, 937–948. <https://doi.org/10.1177/0959683609336569>
- Thevenon, F., Anselmetti, F.S., 2007. Charcoal and fly-ash particles from Lake Lucerne sediments (Central Switzerland) characterized by image analysis: anthropologic, stratigraphic and environmental implications. *Quaternary Science Reviews* 26, 2631–2643. <https://doi.org/10.1016/j.quascirev.2007.05.007>
- Thevenon, F., Bard, E., Williamson, D., Beaufort, L., 2004. A biomass burning record from the West Equatorial Pacific over the last 360 ky: methodological, climatic and anthropic implications. *Palaeogeography, Palaeoclimatology, Palaeoecology* 213, 83–99. [https://doi.org/10.1016/s0031-0182\(04\)00364-5](https://doi.org/10.1016/s0031-0182(04)00364-5)
- Thevenon, F., Williamson, D., Vincens, A., Taieb, M., Merdaci, O., Decobert, M., Buchet, G., 2003. A late-Holocene charcoal record from Lake Masoko, SW Tanzania: climatic and anthropologic implications. *The Holocene* 13, 785–792. <https://doi.org/10.1191/0959683603hl665rr>
- Thomas, I., Hope, G.S., 1994. An example of Holocene vegetation stability from Camerons Lagoon, a near treeline site on the Central Plateau, Tasmania. *Australian Journal of Ecology* 19, 150–158. <https://doi.org/10.1111/j.1442-9993.1994.tb00478.x>
- Tierney, J.E., Mayes, M.T., Meyer, N., Johnson, C., Swarzenski, P.W., Cohen, A.S., Russell, J.M., 2010. Late-twentieth-century warming in Lake Tanganyika unprecedented since AD 500. *Nature Geoscience* 3, 422–425. <https://doi.org/10.1038/ngeo865>
- Timms, R.G.O., Matthews, I.P., Lowe, J.J., Palmer, A.P., Weston, D.J., MacLeod, A., Blockley, S.P.E., 2019. Establishing tephrostratigraphic frameworks to aid the study of abrupt climatic and glacial transitions: a case study of the Last Glacial-Interglacial Transition in the British Isles (c. 16-8 ka BP). *Earth-Science Reviews* 192, 34–64. <https://doi.org/10.1016/j.earscirev.2019.01.003>
- Timms, R.G.O., Matthews, I.P., Palmer, A.P., Candy, I., Abel, L., 2017. A high-resolution tephrostratigraphy from Quoyloo Meadow, Orkney, Scotland: implications for the tephrostratigraphy of NW Europe during the Last Glacial-Interglacial Transition. *Quaternary Geochronology* 40, 67–81. <https://doi.org/10.1016/j.quageo.2016.06.004>
- Tinner, W., 2008. Unpublished data.
- Tinner, W., Conedera, M., Ammann, B., Lotter, A.F., 2005. Fire ecology north and south of the Alps since the last ice age. *The Holocene* 15, 1214–1226. <https://doi.org/10.1191/0959683605hl892rp>
- Tinner, W., Hubschmid, P., Wehrli, M., Ammann, B., Conedera, M., 1999. Long-term forest fire ecology and dynamics in southern Switzerland. *Journal of Ecology* 87, 273–289. <https://doi.org/10.1046/j.1365-2745.1999.00346.x>
- Tinner, W., Lotter, A., 2006. Holocene expansions of *Fagus silvatica* and *Abies alba* in central Europe: where are we after eight decades of debate? *Quaternary Science Reviews* 25, 526–549. <https://doi.org/10.1016/j.quascirev.2005.03.017>
- Tipping, R., Edmonds, M., Sheridan, A., 1993. Palaeoenvironmental investigations directly associated with a Neolithic axe 'quarry' on Beinn Lawers, near Killin, Perthshire, Scotland. *New Phytologist* 123, 585–597. <https://doi.org/10.1111/j.1469-8137.1993.tb03771.x>
- Toney, J.L., Anderson, R.S., 2006. A postglacial palaeoecological record from the San Juan Mountains of Colorado USA: fire, climate and vegetation history. *The Holocene* 16, 505–517. <https://doi.org/10.1191/0959683606hl946rp>

- Tong, X.F., Xiao, X.Y., Yang, X.D., Wang, S.M., Xiao, J.Y., 2009. Climatic changes and human activities revealed by pollen records in Lake Taibai, Hubei Province, the middle and lower reaches of the Yangtze River region over the past 1500 years. *Journal of Lake Sciences* 21, 732–740. <https://doi.org/10.18307/2009.0519>
- Tonkov, S., 2003. Holocene palaeovegetation of the Northwestern Pirin Mountains (Bulgaria) as reconstructed from pollen analysis. *Review of Palaeobotany and Palynology* 124, 51–61. [https://doi.org/10.1016/s0034-6667\(02\)00247-6](https://doi.org/10.1016/s0034-6667(02)00247-6)
- Tonkov, S., Marinova, E., 2005. Pollen and plant macrofossil analyses of radiocarbon dated mid-Holocene profiles from two subalpine lakes in the Rila Mountains, Bulgaria. *The Holocene* 15, 663–671. <https://doi.org/10.1191/0959683605hi842rp>
- Tonkov, S., Possnert, G., 2016. 30. Peat bog Kumata-1, Vitosha Mountain (Bulgaria). *Grana* 55, 250–252. <https://doi.org/10.1080/00173134.2016.1146330>
- Tonkov, S., Possnert, G., 2016. A new late Holocene pollen diagram from Vitosha Mountain. Vegetation history and anthropogenic impact. *Comptes rendus de l'Académie bulgare des Sciences* 69, 327–337.
- Tryterud, E., 2000. Holocene Forest Fire History in South and Central Norway (PhD thesis). Norwegian University of Life Sciences, Ås, Norway.
- Turner, R., Roberts, N., Eastwood, W.J., Jenkins, E., Rosen, A., 2010. Fire, climate and the origins of agriculture: micro-charcoal records of biomass burning during the Last Glacial-Interglacial Transition in Southwest Asia. *Journal of Quaternary Science* 25, 371–386. <https://doi.org/10.1002/jqs.1332>
- Turner, R., Roberts, N., Jones, M.D., 2008. Climatic pacing of Mediterranean fire histories from lake sedimentary microcharcoal. *Global and Planetary Change* 63, 317–324. <https://doi.org/10.1016/j.gloplacha.2008.07.002>
- Umbanhowar Jr, C.E., n.d. Unpublished data.
- Umbanhowar Jr, C.E., 2004. Interactions of climate and fire at two sites in the northern Great Plains, USA. *Palaeogeography, Palaeoclimatology, Palaeoecology* 208, 141–152. <https://doi.org/10.1016/j.palaeo.2004.03.001>
- Umbanhowar Jr, C.E., Camill, P., 2020. Climate and Fire History of the past approximately 10000 years in central Labrador based on sediments from Canoe and 'Big Beer' Lakes. <https://doi.org/10.18739/A2JM23H02>
- Umbanhowar Jr, C.E., Camill, P., Edlund, M., Geiss, C., Hobbs, W., Shinneman, A., Stefanova, I., Lynch, J., 2021. Holocene landscape change at the northern Manitoba tundra-forest border 2003-2009. <https://doi.org/10.18739/A2V11VM5G>
- Umbanhowar Jr, C.E., Camill, P., Geiss, C.E., Teed, R., 2006. Asymmetric vegetation responses to mid-Holocene aridity at the prairie–forest ecotone in south-central Minnesota. *Quaternary Research* 66, 53–66. <https://doi.org/10.1016/j.yqres.2006.03.005>
- Umbanhowar Jr, C.E., Shinneman, A.L.C., Tserenkhand, G., Hammon, E.R., Lor, P., Nail, K., 2009. Regional fire history based on charcoal analysis of sediments from nine lakes in western Mongolia. *The Holocene* 19, 611–624. <https://doi.org/10.1177/0959683609104039>
- Unpublished data, n.d.
- Urrego, D.H., 2006. Long-term Vegetation and Climate Change in Western Amazonia (PhD Dissertation). Biological Sciences. Florida Institute of Technology, Melbourne, FL.
- Urrego, D.H., Niccum, B.A., La Drew, C.F., Silman, M.R., Bush, M.B., 2011. Fire and drought as drivers of early Holocene tree line changes in the Peruvian Andes. *Journal of Quaternary Science* 26, 28–36. <https://doi.org/10.1002/jqs.1422>
- Vachula, R.S., Huang, Y., Longo, W.M., Dee, S.G., Daniels, W.C., Russell, J.M., 2019. Evidence of Ice Age humans in eastern Beringia suggests early migration to North America. *Quaternary Science Reviews* 205, 35–44. <https://doi.org/10.1016/j.quascirev.2018.12.003>

- Valencia, B.G., Urrego, D.H., Silman, M.R., Bush, M.B., 2010. From ice age to modern: a record of landscape change in an Andean cloud forest. *Journal of Biogeography* 37, 1637–1647. <https://doi.org/10.1111/j.1365-2699.2010.02318.x>
- Valsecchi, V., 2005. Holocene Vegetation Dynamics in the Northern Italian Peninsula and in Syria Using Palaeoecological Analyses: Human Impact on Vegetation versus Climate Changes (PhD thesis). University of Milan; University of Bern; Milan, Italy; Bern, Switzerland.
- Valsecchi, V., Carraro, G., Conedera, M., Tinner, W., 2010. Late-Holocene vegetation and land-use dynamics in the Southern Alps (Switzerland) as a basis for nature protection and forest management. *The Holocene* 20, 483–495. <https://doi.org/10.1177/0959683609355178>
- Valsecchi, V., Finsinger, W., Tinner, W., Ammann, B., 2008. Testing the influence of climate, human impact and fire on the Holocene population expansion of *Fagus sylvatica* in the southern Prealps (Italy). *The Holocene* 18, 603–614. <https://doi.org/10.1177/0959683608089213>
- Valsecchi, V., Tinner, W., 2010. Vegetation responses to climatic variability in the Swiss Southern Alps during the Misox event at the early–mid Holocene transition. *Journal of Quaternary Science* 25, 1248–1258. <https://doi.org/10.1002/jqs.1403>
- Valsecchi, V., Tinner, W., Finsinger, W., Ammann, B., 2005. Human impact during the Bronze Age on the vegetation at Lago Lucone (northern Italy). *Vegetation History and Archaeobotany* 15, 99–113. <https://doi.org/10.1007/s00334-005-0026-6>
- van Bellen, S., Garneau, M., Ali, A.A., Bergeron, Y., 2012. Did fires drive Holocene carbon sequestration in boreal ombrotrophic peatlands of eastern Canada? *Quaternary Research* 78, 50–59. <https://doi.org/10.1016/j.yqres.2012.03.009>
- van Bellen, S., Garneau, M., Ali, A.A., Lamarre, A., C. Robert, Magnan, G., Asnong, H., Pratte, S., 2013. Poor fen succession over ombrotrophic peat related to late Holocene increased surface wetness in subarctic Quebec, Canada. *Journal of Quaternary Science* 28, 748–760. <https://doi.org/10.1002/jqs.2670>
- van de Geer, G., Fitzsimons, S.J., Colhoun, E.A., 1989. Holocene to middle last glaciation vegetation history at Newall Creek, western Tasmania. *New Phytologist* 111, 549–558. <https://doi.org/10.1111/j.1469-8137.1989.tb00717.x>
- Vandergoes, M.J., Newnham, R.M., Denton, G.H., Blaauw, M., Barrell, D.J.A., 2013. The anatomy of Last Glacial Maximum climate variations in south Westland, New Zealand, derived from pollen records. *Quaternary Science Reviews* 74, 215–229. <https://doi.org/10.1016/j.quascirev.2013.04.015>
- Vandergoes, M.J., Newnham, R.M., Preusser, F., Hendy, C.H., Lowell, T.V., Fitzsimons, S.J., Hogg, A.G., Kasper, H.U., Schlüchter, C., 2005. Regional insolation forcing of late Quaternary climate change in the Southern Hemisphere. *Nature* 436, 242–245. <https://doi.org/10.1038/nature03826>
- van der Kaars, S., de Deckker, P., 2002. A Late Quaternary pollen record from deep-sea core Fr10/95, GC17 offshore Cape Range Peninsula, northwestern Western Australia. *Review of Palaeobotany and Palynology* 120, 17–39. [https://doi.org/10.1016/s0034-6667\(02\)00075-1](https://doi.org/10.1016/s0034-6667(02)00075-1)
- van der Kaars, S., Penny, D., Tibby, J., Fluin, J., Dam, R.A.C., Suparan, P., 2001. Late Quaternary palaeoecology, palynology and palaeolimnology of a tropical lowland swamp: Rawa Danau, West-Java, Indonesia. *Palaeogeography, Palaeoclimatology, Palaeoecology* 171, 185–212. [https://doi.org/10.1016/s0031-0182\(01\)00245-0](https://doi.org/10.1016/s0031-0182(01)00245-0)
- van der Kaars, S., Wang, X., Kershaw, A.P., Guichard, F., Setiabudi, D.A., 2000. A Late Quaternary palaeoecological record from the Banda Sea, Indonesia: patterns of vegetation, climate and biomass burning in Indonesia and northern Australia. *Palaeogeography, Palaeoclimatology, Palaeoecology* 155, 135–153. [https://doi.org/10.1016/s0031-0182\(99\)00098-x](https://doi.org/10.1016/s0031-0182(99)00098-x)
- van der Knaap, W.O., van Leeuwen, J.F.N., 1997. Late Glacial and early Holocene vegetation succession, altitudinal vegetation zonation, and climatic change in the Serra da Estrela, Portugal. *Review of Palaeobotany and Palynology* 97, 239–285. [https://doi.org/10.1016/s0034-6667\(97\)00008-0](https://doi.org/10.1016/s0034-6667(97)00008-0)

- van der Knaap, W.O., van Leeuwen, J.F.N., 1995. Holocene vegetation succession and degradation as responses to climatic change and human activity in the Serra de Estrela, Portugal. *Review of Palaeobotany and Palynology* 89, 153–211. [https://doi.org/10.1016/0034-6667\(95\)00048-0](https://doi.org/10.1016/0034-6667(95)00048-0)
- van Leeuwen, J.F.N., van der Knaap, W.O., 2008. 3. Fleck's Loch Bog (Foula, Shetland, Scotland, UK). *Grana* 47, 171–173. <https://doi.org/10.1080/00173130802113809>
- Vannière, B., 2001. *Fire, Agropastoralism and Environmental Dynamics in France during the Holocene* (PhD thesis). National Agronomic Institute of Paris, Paris, France.
- Vannière, B., Bossuet, G., Walter-Simonnet, A.-V., Gauthier, E., Barral, P., Petit, C., Buatier, M., Daubigney, A., 2003. Land use change, soil erosion and alluvial dynamic in the lower Doubs Valley over the 1st millennium AD (Neublans, Jura, France). *Journal of Archaeological Science* 30, 1283–1299. [https://doi.org/10.1016/S0305-4403\(03\)00017-7](https://doi.org/10.1016/S0305-4403(03)00017-7)
- Vannière, B., Colombaroli, D., Chapron, E., Leroux, A., Tinner, W., Magny, M., 2008. Climate versus human-driven fire regimes in Mediterranean landscapes: the Holocene record of Lago dell'Accesa (Tuscany, Italy). *Quaternary Science Reviews* 27, 1181–1196. <https://doi.org/10.1016/j.quascirev.2008.02.011>
- Vannière, B., Galop, D., Rendu, C., Davasse, B., 2001. Feu et pratiques agro-pastorales dans les Pyrénées-Orientales: le cas de la montagne d'Enveitg (Cerdagne, Pyrénées-Orientales, France). *Sud-Ouest Européen* 11, 29–42.
- Vannière, B., Laggoun-Déferge, F., 2002. Première contribution à l'étude des évolutions paléohydrologiques et à l'histoire des feux en Champagne berrichonne durant l'Holocène. Le cas du Marais du Grand-Chaumet (Indre, France). *Histoire des rivières et des lacs de Lascaux à nos jours* 101–124.
- Vannière, B., Martineau, R., 2005. Histoire des feux et pratiques agraires du Néolithique à l'âge du Fer en région Centre : implications territoriales, démographiques et environnementales. *Gallia préhistoire* 47, 167–186. <https://doi.org/10.3406/galip.2005.2049>
- Vannière, B., Rius, D., n.d. Unpublished data.
- Väliranta, M., Kaakinen, A., Kuhry, P., 2003. Holocene climate and landscape evolution east of the Pechora Delta, East-European Russian Arctic. *Quaternary Research* 59, 335–344. [https://doi.org/10.1016/S0033-5894\(03\)00041-3](https://doi.org/10.1016/S0033-5894(03)00041-3)
- Väliranta, M., Korhola, A., Seppä, H., Tuittila, E.-S., Sarmaja-Korjonen, K., Laine, J., Alm, J., 2007. High-resolution reconstruction of wetness dynamics in a southern boreal raised bog, Finland, during the late Holocene: a quantitative approach. *The Holocene* 17, 1093–1107. <https://doi.org/10.1177/0959683607082550>
- Väliranta, M., Kultti, S., Nyman, M., Sarmaja-Korjonen, K., 2005. Holocene development of aquatic vegetation in shallow Lake Njargajavri, Finnish Lapland, with evidence of water-level fluctuations and drying. *Journal of Paleolimnology* 34, 203–215. <https://doi.org/10.1007/s10933-005-1840-7>
- Väliranta, M., Kultti, S., Seppä, H., 2006. Vegetation dynamics during the Younger Dryas-Holocene transition in the extreme northern taiga zone, northeastern European Russia. *Boreas* 35, 202–212. <https://doi.org/10.1111/j.1502-3885.2006.tb01150.x>
- Väliranta, M., Piilo, S., n.d. Unpublished data.
- Väliranta, M., Piilo, S., Kuosmanen, N., n.d. Unpublished data.
- Väliranta, M., Weckström, J., Siitonen, S., Seppä, H., Alkio, J., Juutinen, S., Tuittila, E.-S., 2011. Holocene aquatic ecosystem change in the boreal vegetation zone of northern Finland. *Journal of Paleolimnology* 45, 339–352. <https://doi.org/10.1007/s10933-011-9501-5>
- Velle, G., Larsen, J., Eide, W., Peglar, S.M., Birks, H.J.B., 2005. Holocene environmental history and climate of Råtåsjoen, a low-alpine lake in south-central Norway. *Journal of Paleolimnology* 33, 129–153. <https://doi.org/10.1007/s10933-004-2689-x>
- Verardo, D.J., Ruddiman, W.F., 1996. Late Pleistocene charcoal in tropical Atlantic deep-sea sediments: climatic and geochemical significance. *Geology* 24, 855–857. [https://doi.org/10.1130/0091-7613\(1996\)024<0855:lpcita>2.3.co;2](https://doi.org/10.1130/0091-7613(1996)024<0855:lpcita>2.3.co;2)



- Vescovi, E., Ammann, B., Ravazzi, C., Tinner, W., 2010. A new Late-glacial and Holocene record of vegetation and fire history from Lago del Greppo, northern Apennines, Italy. *Vegetation History and Archaeobotany* 19, 219–233. <https://doi.org/10.1007/s00334-010-0243-5>
- Veski, S., 1998. *Vegetation History, Human Impact and Palaeogeography of West Estonia: Pollen Analytical Studies of Lake and Bog Sediments* (PhD thesis). Societas Upsaliensis pro geologia quaternaria [Kvartärgeologiska fören], Uppsala, Sweden.
- Veski, S., Koppel, K., Poska, A., 2005. Integrated palaeoecological and historical data in the service of fine-resolution land use and ecological change assessment during the last 1000 years in Rõuge, southern Estonia. *Journal of Biogeography* 32, 1473–1488. <https://doi.org/10.1111/j.1365-2699.2005.01290.x>
- Vélez, M.I., Berrío, J.C., Hooghiemstra, H., Metcalfe, S., Marchant, R., 2005. Palaeoenvironmental changes during the last ca. 8590 calibrated yr (7800 radiocarbon yr) in the dry forest ecosystem of the Patía Valley, Southern Colombian Andes: a multiproxy approach. *Palaeogeography, Palaeoclimatology, Palaeoecology* 216, 279–302. <https://doi.org/10.1016/j.palaeo.2004.11.006>
- Villa-Martínez, R., Moreno, P.I., 2007. Pollen evidence for variations in the southern margin of the westerly winds in SW Patagonia over the last 12,600 years. *Quaternary Research* 68, 400–409. <https://doi.org/10.1016/j.yqres.2007.07.003>
- Villa-Martínez, R., Moreno, P.I., Valenzuela, M.A., 2012. Deglacial and postglacial vegetation changes on the eastern slopes of the central Patagonian Andes (47°S). *Quaternary Science Reviews* 32, 86–99. <https://doi.org/10.1016/j.quascirev.2011.11.008>
- Villa-Martínez, R., Villagrán, C., Jenny, B., 2004. Pollen evidence for late-Holocene climatic variability at Laguna de Aculeo, Central Chile (lat. 34°S). *The Holocene* 14, 361–367. <https://doi.org/10.1191/0959683604hl712rp>
- Villa-Martínez, R., Villagrán, C., Jenny, B., 2003. The last 7500 cal yr B.P. of westerly rainfall in Central Chile inferred from a high-resolution pollen record from Laguna Aculeo (34°S). *Quaternary Research* 60, 284–293. <https://doi.org/10.1016/j.yqres.2003.07.007>
- Villota, A., Behling, H., 2014. Late Glacial and Holocene environmental change inferred from the Páramo of Cajanuma in the Podocarpus National Park, southern Ecuador: Cambios ambientales durante el Último Glacial y Holoceno inferidos del páramo de Cajanuma en el Parque Nacional Podocarpus, sur del Ecuador. *Caldasia* 36, 345–365. <https://doi.org/10.15446/caldasia/v36n2.47491>
- Villota, A., León-Yáñez, S., Behling, H., 2015. Mid-and late Holocene vegetation and environmental dynamics in the Llanganates National Park, Anteojos Valley, central Ecuadorian Andes. *Palynology* 39, 350–361. <https://doi.org/10.1080/01916122.2014.977404>
- Vincze, I., Orbán, I., Birks, H.H., Pál, I., Finsinger, W., Hubay, K., Marinova, E., Jakab, G., Braun, M., Biró, T., and Tóth, M., 2017. Holocene treeline and timberline changes in the South Carpathians (Romania): Climatic and anthropogenic drivers on the southern slopes of the Retezat Mountains. *The Holocene* 27, 1613–1630. <https://doi.org/10.1177/0959683617702227>
- von Stedingk, H., 1999. *Vegetationsutveckling och brandhistorik i Tyresta under 9000 år: en pollenanalytisk studie av en skvattramtallmyr i Tyresta nationalpark, Södermanland*. Institutionen för skoglig vegetationsekologi.
- Wacnik, A., Ralska-Jasiewiczowa, M., Madeyska, E., 2011. Late Glacial and Holocene history of vegetation in Gostynin area, central Poland. *Acta Palaeobotanica* 51, 249–278.
- Wahl, D., Anderson, L., Estrada-Belli, F., Tokovinine, A., 2019. Palaeoenvironmental, epigraphic and archaeological evidence of total warfare among the Classic Maya. *Nature Human Behaviour* 3, 1049–1054.
- Waito, J., Girardin, M.P., Tardif, J.C., Conciatori, F., Bergeron, Y., Ali, A.A., 2018. Recent fire activity in the boreal eastern interior of North America is below that of the past 2000 yr. *Ecosphere* 9, e02287. <https://doi.org/10.1002/ecs2.2287>

- Walsh, M.K., Pearl, C.A., Whitlock, C., Bartlein, P.J., Worona, M.A., 2010. An 11 000-year-long record of fire and vegetation history at Beaver Lake, Oregon, central Willamette Valley. *Quaternary Science Reviews* 29, 1093–1106. <https://doi.org/10.1016/j.quascirev.2010.02.011>
- Walsh, M.K., Whitlock, C., Bartlein, P.J., 2010. 1200 years of fire and vegetation history in the Willamette Valley, Oregon and Washington, reconstructed using high-resolution macroscopic charcoal and pollen analysis. *Palaeogeography, Palaeoclimatology, Palaeoecology* 297, 273–289. <https://doi.org/10.1016/j.palaeo.2010.08.007>
- Walsh, M.K., Whitlock, C., Bartlein, P.J., 2008. A 14,300-year-long record of fire–vegetation–climate linkages at Battle Ground Lake, southwestern Washington. *Quaternary Research* 70, 251–264. <https://doi.org/10.1016/j.yqres.2008.05.002>
- Wang, X.C., Mo, D.W., Li, C.H., Yu, S.Y., Xue, B., Liu, B., Wang, H., Shi, C.X., 2017. Environmental changes and human activities at a fortified site of the Liangzhu culture in eastern China: evidence from pollen and charcoal records. *Quaternary International* 438, 189–197. <https://doi.org/10.1016/j.quaint.2017.05.001>
- Wang, X.L., He, Y., Jia, T.F., Q., L.R., 2004. Living environment of ancient man since 7000 a B.P. at Xishan Relic Site of Zhengzhou in Henan Province. *Journal of Palaeogeography* 6, 234–240.
- Wang, X., Peng, P.A., Ding, Z.L., 2005. Black carbon records in Chinese Loess Plateau over the last two glacial cycles and implications for paleofires. *Palaeogeography, Palaeoclimatology, Palaeoecology* 223, 9–19. <https://doi.org/10.1016/j.palaeo.2005.03.023>
- Wang, X., van der Kaars, S., Kershaw, A.P., Bird, M., Jansen, F., 1999. A record of fire, vegetation and climate through the last three glacial cycles from Lombok Ridge core G6-4, eastern Indian Ocean, Indonesia. *Palaeogeography, Palaeoclimatology, Palaeoecology* 147, 241–256. [https://doi.org/10.1016/s0031-0182\(98\)00169-2](https://doi.org/10.1016/s0031-0182(98)00169-2)
- Wang, X., Xiao, J., Cui, L., Ding, Z., 2013. Holocene changes in fire frequency in the Daihai Lake region (north-central China): indications and implications for an important role of human activity. *Quaternary Science Reviews* 59, 18–29. <https://doi.org/10.1016/j.quascirev.2012.10.033>
- Wang, Y.J., Liu, D.S., Liu, L.J., Gu, D.Q., 2004. Distinction of human activities from natural processes-with reference to Lijin Profile, Shandong, China. *Acta Oceanologica Sinica* 26, 106–115.
- Wang, Y.J., Xu, X., Li, F.L., 2003. Geologist’s concern over environmental effect of human activities: with reference to charcoal fragment analysis for the Yellow River Delta. *Advances in Marine Science* 21, 251–258.
- Wang, Y.W., 2015. The History of Fire and Human Activities in Taixue Village of Luoyang Basin (PhD thesis). Xi’an Polytechnic University, Xi’an, China.
- Weiss, D., Shotyk, W., Boyle, E.A., Kramers, J.D., Appleby, P.G., Cheburkin, A.K., 2002. Comparative study of the temporal evolution of atmospheric lead deposition in Scotland and eastern Canada using blanket peat bogs. *Science of The Total Environment* 292, 7–18. [https://doi.org/10.1016/s0048-9697\(02\)00025-6](https://doi.org/10.1016/s0048-9697(02)00025-6)
- Wells, C., Huckerby, E., Hall, V., 1997. Mid- and late-Holocene vegetation history and tephra studies at Fenton Cottage, Lancashire, U.K. *Vegetation History and Archaeobotany* 6, 153–166. <https://doi.org/10.1007/bf01372568>
- Werner, K., Andreev, A., Diekmann, B., Kienast, F., Zech, W., 2005. Holocene vegetation history of the Verkhojansk Mountains Foreland, north-eastern Siberia, in: *Proceedings of the 22th International Polar Meeting*. Jena, Germany.
- Whitlock, C., Bartlein, P.J., 1993. Spatial variations of Holocene climatic change in the Yellowstone region. *Quaternary Research* 39, 231–238. <https://doi.org/10.1006/qres.1993.1026>
- Whitlock, C., Bianchi, M.M., Bartlein, P.J., Markgraf, V., Marlon, J., Walsh, M., McCoy, N., 2006. Postglacial vegetation, climate, and fire history along the east side of the Andes (lat 41–42.5°S), Argentina. *Quaternary Research* 66, 187–201. <https://doi.org/10.1016/j.yqres.2006.04.004>

- Whitlock, C., Dean, W., Rosenbaum, J., Stevens, L., Fritz, S., Bracht, B., Power, M., 2008. A 2650-year-long record of environmental change from northern Yellowstone National Park based on a comparison of multiple proxy data. *Quaternary International* 188, 126–138.  
<https://doi.org/10.1016/j.quaint.2007.06.005>
- Whitlock, C., Shafer, S.L., Marlon, J., 2003. The role of climate and vegetation change in shaping past and future fire regimes in the northwestern US and the implications for ecosystem management. *Forest Ecology and Management* 178, 5–21. [https://doi.org/10.1016/s0378-1127\(03\)00051-3](https://doi.org/10.1016/s0378-1127(03)00051-3)
- Whitlock, C., Skinner, C.N., Bartlein, P.J., Minckley, T., Mohr, J.A., 2004. Comparison of charcoal and tree-ring records of recent fires in the eastern Klamath Mountains, California, USA. *Canadian Journal of Forest Research* 34, 2110–2121. <https://doi.org/10.1139/x04-084>
- Whittington, G., Edwards, K.J., Cundill, P.R., 1991. Late-and post-glacial vegetational change at Black Loch, Fife, eastern Scotland—a multiple core approach. *New Phytologist* 118, 147–166.  
<https://doi.org/10.1111/j.1469-8137.1991.tb00575.x>
- Wick, L., 1994. Early-Holocene reforestation and vegetation change at a lake near the alpine forest limit: Lago Basso (2250 m asl), northern Italy. *Dissertationes Botanicae* 234, 555–563.
- Wick, L., Lemcke, G., Sturm, M., 2003. Evidence of Lateglacial and Holocene climatic change and human impact in eastern Anatolia: high-resolution pollen, charcoal, isotopic and geochemical records from the laminated sediments of Lake Van, Turkey. *The Holocene* 13, 665–675.  
<https://doi.org/10.1191/0959683603hl653rp>
- Wick, L., van Leeuwen, J.F.N., van der Knaap, W.O., Lotter, A.F., 2003. Holocene vegetation development in the catchment of Sägistalsee (1935 m asl), a small lake in the Swiss Alps. *Journal of Paleolimnology* 30, 261–272. <https://doi.org/10.1023/A:1026088914129>
- Wieckowska-Lüth, M., Kirleis, W., Doerfler, W., 2017. Holocene history of landscape development in the catchment of Lake Skogstjern, southeastern Norway, based on a high-resolution multi-proxy record. *The Holocene* 27, 1928–1947. <https://doi.org/10.1177/0959683617715691>
- Wiethold, J., 1998. Studien zur jüngeren postglazialen Vegetations- und Siedlungsgeschichte im östlichen Schleswig-Holstein. *Archäologische Informationen* 21, 191–196.
- Wille, M., Hooghiemstra, H., van Geel, B., Behling, H., de Jong, A., van der Borg, K., 2003. Submillennium-scale migrations of the rainforest–savanna boundary in Colombia: <sup>14</sup>C wiggle-matching and pollen analysis of core Las Margaritas. *Palaeogeography, Palaeoclimatology, Palaeoecology* 193, 201–223.  
[https://doi.org/10.1016/S0031-0182\(03\)00226-8](https://doi.org/10.1016/S0031-0182(03)00226-8)
- Williams, N.J., 2005. The Environmental Reconstruction of the Last Glacial Cycle at Redhead Lagoon in Coastal, Eastern Australia (PhD thesis). University of Sydney, Sydney, Australia.
- Willis, K.J., Braun, M., Sumegi, P., Toth, A., 1997. Does soil change cause vegetation change or vice versa? A temporal perspective from Hungary. *Ecology* 78, 740–750. <https://doi.org/10.2307/2266054>
- Willis, K.J., Sümegi, P., Braun, M., Tóth, A., 1995. The late Quaternary environmental history of Bátorliget, N.E. Hungary. *Palaeogeography, Palaeoclimatology, Palaeoecology* 118, 25–47.  
[https://doi.org/10.1016/0031-0182\(95\)00004-6](https://doi.org/10.1016/0031-0182(95)00004-6)
- Winkler, M.G., 1985. A 12,000-year history of vegetation and climate for Cape Cod, Massachusetts. *Quaternary Research* 23, 301–312. [https://doi.org/10.1016/0033-5894\(85\)90037-7](https://doi.org/10.1016/0033-5894(85)90037-7)
- Wohlfarth, B., Luoto, T.P., Muschitiello, F., Väliranta, M., Björck, S., Davies, S.M., Kylander, M., Ljung, K., Reimer, P.J., Smittenberg, R.H., 2018. Climate and environment in southwest Sweden 15.5–11.3 cal. ka BP. *Boreas* 47, 687–710. <https://doi.org/10.1111/bor.12310>
- Wohlfarth, B., Muschitiello, F., Greenwood, S.L., Andersson, A., Kylander, M., Smittenberg, R.H., Steinthorsdottir, M., Watson, J., Whitehouse, N.J., 2017. Åsseldala—a key site for Last Termination climate events in northern Europe. *Boreas* 46, 143–161. <https://doi.org/10.1111/bor.12207>
- Wooller, M.J., Street-Perrott, F.A., Agnew, A.D.Q., 2000. Late Quaternary fires and grassland palaeoecology of Mount Kenya, East Africa: evidence from charred grass cuticles in lake sediments.

- Palaeogeography, Palaeoclimatology, Palaeoecology 164, 207–230. [https://doi.org/10.1016/s0031-0182\(00\)00187-5](https://doi.org/10.1016/s0031-0182(00)00187-5)
- Wooller, M.J., Swain, D.L., Ficken, K.J., Agnew, A.D.Q., Street-Perrott, F.A., Eglinton, G., 2003. Late Quaternary vegetation changes around Lake Rutundu, Mount Kenya, East Africa: evidence from grass cuticles, pollen and stable carbon isotopes. *Journal of Quaternary Science* 18, 3–15. <https://doi.org/10.1002/jqs.725>
- Worona, M.A., Whitlock, C., 1995. Late Quaternary vegetation and climate history near Little Lake, central Coast Range, Oregon. *Geological Society of America Bulletin* 107, 867–876. [https://doi.org/10.1130/0016-7606\(1995\)107<0867:LQVACH>2.3.CO;2](https://doi.org/10.1130/0016-7606(1995)107<0867:LQVACH>2.3.CO;2)
- Worthy, M., 2005. Mountain occupation project mires of the Australian capital territory: environmental change of the alluvial infill of Muellers Rock Creek, Upper Cotter Valley.
- Wu, J., Liu, Q., 2013. Charcoal-recorded climate changes from Moon Lake in late-glacial. *Chinese Journal of Geology* 48, 860–869. <https://doi.org/10.3969/j.issn.0563-5020.2013.03.021>
- Wu, L., Wang, X.Y., Zhang, G.S., Xiao, X.Y., 2008. Vegetation evolution and climate change since the Holocene recorded by pollen-charcoal assemblages from lacustrine sediments of Chaohu Lake in Anhui Province. *Journal of Palaeogeography* 10, 183–192.
- Xia, J., Haskell, B.J., Engstrom, D.R., Ito, E., 1997. Holocene climate reconstructions from tandem trace-element and stable-isotope composition of ostracodes from Coldwater Lake, North Dakota, USA. *Journal of Paleolimnology* 17, 85–100. <https://doi.org/10.1023/A:1007921328712>
- Xiao, X., Haberle, S.G., Li, Y.L., Liu, E., Shen, J., Zhang, E., Yin, J., Wang, S., 2018. Evidence of Holocene climatic change and human impact in northwestern Yunnan Province: high-resolution pollen and charcoal records from Chenghai Lake, southwestern China. *The Holocene* 28, 127–139. <https://doi.org/10.1177/0959683617715692>
- Xiao, X., Haberle, S.G., Shen, J., Xue, B., Burrows, M., Wang, S., 2017. Postglacial fire history and interactions with vegetation and climate in southwestern Yunnan Province of China. *Climate of the Past* 13, 613–627. <https://doi.org/10.5194/cp-13-613-2017>
- Xin, X., Yiyin, L., 2015. Comparison of the fire history reconstructions from three different kinds of charcoal data on the same site, Daxing'an Mountain. *Quaternary Sciences* 35, 960–966. <https://doi.org/10.11928/j.issn.1001-7410.2015.04.17>
- Xu, Q.H., Kong, Z.C., Chen, X.D., Yang, X.L., Liang, W.D., Sun, L.M., 2002. Discussion on the environment changes and the effects of human impacts in the east Ordos Plateau since 4000a B.P. *Quaternary Sciences* 22, 105–112.
- Xue, J., Zhong, W., Xie, L., Unkel, I., 2015. Millennial-scale variability in biomass burning covering the interval ~41,000–7050cal BP in the tropical Leizhou Peninsula (south China). *Palaeogeography, Palaeoclimatology, Palaeoecology* 438, 344–351. <https://doi.org/10.1016/j.palaeo.2015.08.037>
- Yang, X.D., Wang, S., Shen, J., Zhu, Y., Zhang, Z., Wu, Y., 2002. Lacustrine environment responses to human activities in the past 300 years in Longgan Lake catchment, southeast China. *Science in China Series D: Earth Sciences* 45, 709–718. <https://doi.org/10.1007/bf02878428>
- Yasuda, Y., Kitagawa, H., Nakagawa, T., 2000. The earliest record of major anthropogenic deforestation in the Ghab Valley, northwest Syria: a palynological study. *Quaternary International* 73-74, 127–136. [https://doi.org/10.1016/s1040-6182\(00\)00069-0](https://doi.org/10.1016/s1040-6182(00)00069-0)
- Yu, S., 2003. The Littorina Transgression in Southeastern Sweden and its Relation to Mid-Holocene Climate Variability (No. 51) (PhD thesis). Lund University, Lund, Sweden.
- Yu, S.-Y., Andrén, E., Barnekow, L., Berglund, B.E., Sandgren, P., 2008. Holocene palaeoecology and shoreline displacement on the Biskopsmåla Peninsula, southeastern Sweden. *Boreas* 32, 578–589. <https://doi.org/10.1111/j.1502-3885.2003.tb01237.x>
- Yu, S.-Y., Berglund, B.E., Andrén, E., Sandgren, P., 2004. Mid-Holocene Baltic Sea transgression along the coast of Blekinge, SE Sweden – ancient lagoons correlated with beach ridges. *GFF* 126, 257–272. <https://doi.org/10.1080/11035890401263257>



- Yu, S.-Y., Berglund, B.E., Sandgren, P., Fritz, S.C., 2005. Holocene palaeoecology along the Blekinge coast, SE Sweden, and implications for climate and sea-level changes. *The Holocene* 15, 278–292. <https://doi.org/10.1191/0959683605hl792rp>
- Zawisza, E., Zawiska, I., Szeroczynska, K., Correa-Metrio, A., Mirosław-Grabowska, J., Obremaska, M., Rzodkiewicz, M., Słowinski, M., Woszczyk, M., 2019. Dystrophication of lake Suchar IV (NE Poland): an alternative way of lake development. *Limnetica* 38, 391–416. <https://doi.org/10.23818/limn.38.23>
- Zhang, H., Zhang, Y., Kong, Z., Yang, Z., Li, Y., Tarasov, P.E., 2014. Late Holocene climate change and anthropogenic activities in north Xinjiang: Evidence from a peatland archive, the Caotanhu wetland. *The Holocene* 25, 323–332. <https://doi.org/10.1177/0959683614558646>
- Zhang, J.H., Kong, Z.C., Du, N., 1999. Vegetation and environmental changes in the Fangshan area of Beijing from 16000–7000 years B.P. *Acta Micropaleontologica Sinica* 16, 421–430.
- Zhang, J.H., Kong, Z.C., Du, N., 1997. Charcoal analysis and fire changes at Dongganchi of Fangshan in Beijing since 15000 Years BP. *Chinese Journal of Plant Ecology* 21, 161–168.
- Zhang, J.H., Kong, Z.C., Du, N.Q., 1996. Disastrous abrupt climate events of environment change in Beijing in recent 15,000 years. *Journal of Catastrophology* 11, 71–75.
- Zhang, X.Y., Li, Y.H., Liu, G.N., Yin, H.N., 2004. Environmental change in the northwest area of Liaoning Province during the middle Holocene. *Marine Geology & Quaternary Geology* 24, 115–120.
- Zhang, Y., Kong, Z.C., Yang, Z.J., Shun, Y., Ni, J., 2004. Vegetation changes and environmental evolution in the Urumqi River Head, central Tianshan Mountains since 3.6 ka BP: a case study of Daxigou profile. *Journal of Integrative Plant Biology* 46, 655–667.
- Zhang, Z., Zhong, J., Lv, X., Tong, S., Wang, G., 2015. Paleofire, vegetation, and climate reconstructions of the middle to late Holocene from lacustrine sediments of the Toushe Basin, Taiwan. *Palaeogeography, Palaeoclimatology, Palaeoecology* 438, 1–8. <https://doi.org/10.1016/j.palaeo.2015.07.028>
- Zhao, H.L., Li, X.Q., Hall, V.A., 2015. Holocene vegetation change in relation to fire and volcanic events in Jilin, Northeastern China. *Science China Earth Sciences* 58, 1404–1419. <https://doi.org/10.1007/s11430-015-5068-8>
- Zhao, K.L., Li, X.Q., Zhou, X.Y., 2011. Agricultural activities and its impact on the environment in lower Xiajadian culture period of the Chengzishan Site west Liaoning Province. *Quaternary Sciences* 31, 8–15.
- Zhao, L., Ma, C., Leipe, C., Long, T., Liu, K.-b., Lu, H., Tang, L., Zhang, Y., Wagner, M., Tarasov, P.E., 2017. Holocene vegetation dynamics in response to climate change and human activities derived from pollen and charcoal records from southeastern China. *Palaeogeography, Palaeoclimatology, Palaeoecology* 485, 644–660. <https://doi.org/10.1016/j.palaeo.2017.06.035>
- Zhao, P.F., Li, Y.Y., 2012. The records of Sphagnum spore and charcoal in the peatland of Daxing'an Mountain since 1300 years and their paleoenvironment implication. *Quaternary Sciences* 32, 563–564.
- Zhao, W.Y., 2005. Studies on the Wildfire and the Pedogenical Environment Changes of Holocene in the Middle Reaches of the Jinghe River. Xi'an (PhD thesis). Shanxi Normal University, Xi'an, China.
- Zhao, W., Zhao, Y., Qin, F., 2017. Holocene fire, vegetation, and climate dynamics inferred from charcoal and pollen record in the eastern Tibetan Plateau. *Journal of Asian Earth Sciences* 147, 9–16. <https://doi.org/10.1016/j.jseaes.2017.07.017>
- Zhao, Y., Chen, F., Zhou, A., Yu, Z., Zhang, K., 2010. Vegetation history, climate change and human activities over the last 6200 years on the Liupan Mountains in the southwestern Loess Plateau in central China. *Palaeogeography, Palaeoclimatology, Palaeoecology* 293, 197–205. <https://doi.org/10.1016/j.palaeo.2010.05.020>

- Zhao, Y., Hou, G., E, C., Yang, L., Wang, Q., 2016. Charcoal concentration reflect of environment change and human activities in Xiadawu Relic, Qinghai-Tibet Plateau. *Journal of Earth Environment* 1, 19–26. <https://doi.org/10.7515/JEE201601003>
- Zhou, X.Y., Li, X.Q., Zhao, K.L., Dodson, J., Sun, N., Yang, Q., 2011. Early agricultural development and environmental effects in the Neolithic Longdong basin (eastern Gansu). *Chinese Science Bulletin* 56, 762–771. <https://doi.org/10.1007/s11434-010-4286-x>
- Zhu, X.H., Li, B., Ma, C.M., Zhu, C., Wu, L., Liu, H., 2017. Late Neolithic phytolith and charcoal records of human activities and vegetation change in Shijiahe culture, Tanjialing site, China. *PLOS ONE* 12, e0177287. <https://doi.org/10.1371/journal.pone.0177287>
